# Supplementary material for: Synthesis of Gb3 Glycosphingolipids with Labeled Head Groups: Distribution in Phase‐Separated Giant Unilamellar Vesicles
Source: PubMed Central journal article supplement (PMC6899692; doi:10.1002/anie.201910148), 2019-10-21
Supplement: ANIE-58-17805-s001.pdf [file ANIE-58-17805-s001.pdf]

## Supporting Information

### **Synthesis of Gb<sub>3</sub> Glycosphingolipids with Labeled Head Groups: Distribution in Phase-Separated Giant Unilamellar Vesicles**

*Jeremias Sibold<sup>+</sup>, Katharina Kettelhoit<sup>+</sup>, Loan Vuong, Fangyuan Liu, Daniel B. Werz,<sup>\*</sup> and  
Claudia Steinem<sup>\*</sup>*

anie\_201910148\_sm\_miscellaneous\_information.pdf

**Table of Contents**

|                                                                                                                                     |      |
|-------------------------------------------------------------------------------------------------------------------------------------|------|
| General experimental (chemical synthesis) .....                                                                                     | S2   |
| General procedures .....                                                                                                            | S3   |
| Synthesis of fluorescently labeled Gb <sub>3</sub> species .....                                                                    | S4   |
| Synthesis of azidosphingosine <b>10</b> .....                                                                                       | S47  |
| NMR spectra .....                                                                                                                   | S48  |
| Materials .....                                                                                                                     | S123 |
| Preparation of giant unilamellar vesicles (GUVs).....                                                                               | S123 |
| Fluorescence microscopy of GUVs.....                                                                                                | S123 |
| Self-quenching of BODIPY labeled Gb <sub>3</sub> .....                                                                              | S123 |
| <i>l<sub>o</sub></i> distribution of different Gb <sub>3</sub> species with a PEG <sub>3</sub> linker (SM-porc).....                | S124 |
| <i>l<sub>o</sub></i> distribution of different Gb <sub>3</sub> species with a PEG <sub>3</sub> linker (chemically defined SM) ..... | S125 |
| References .....                                                                                                                    | S126 |

**General experimental (chemical synthesis)**

Air and moisture sensitive reactions were carried out in oven-dried or flame-dried glassware, septum-capped under atmospheric pressure or argon. The solvents were dried by standard procedures and distilled prior to use. If necessary, solvents were degassed via freeze-pump-thaw technique. Commercially available compounds were used without further purification unless otherwise stated. Dye **9** was purchased from Lumiprobe/Germany and PEG linker **23** from Broadpharm/USA. Proton ( $^1\text{H}$ ), carbon ( $^{13}\text{C}$ ) and fluorine ( $^{19}\text{F}$ ) NMR spectra were recorded on a 300, 400, 500 or 600 MHz instrument using the residual signals from tetramethyl silane (TMS)  $\delta = 0.00$  ppm as internal references for  $^1\text{H}$  and  $^{13}\text{C}$  chemical shifts, respectively. Mass spectrometry was carried out on a FT-ICR instrument. IR spectra were measured on an ATR spectrometer. Optical rotations were obtained using a common polarimeter. Dialysis was performed in deionized water using cellulose ester tubing with a molecular weight cut-off of 100-500 g/mol. Gel permeation HPLC was performed in chloroform using a recycling type system.

## SUPPORTING INFORMATION

**General procedure 1 (GP1): Synthesis of trichloroacetimidates**

To a solution of the fully protected sugar in dry dichloromethane was added trifluoroacetic acid at 0 °C. The reaction was stopped by adding dichloromethane and water. The organic layer was washed with diluted aq. NaHCO<sub>3</sub> solution (3×) and sat. aq. NaCl solution until pH 7 was reached, dried over Na<sub>2</sub>SO<sub>4</sub>, filtered and the solvent was removed under reduced pressure. The reducing sugar was dissolved in dry dichloromethane, the solution was cooled to 0 °C and trichloroacetonitrile and DBU were added. The reaction mixture was stirred at 0 °C until completion of the reaction and all volatiles were removed under reduced pressure.

**General procedure 2 (GP2): Glycosylation with azidosphingosine 10**

The trichloroacetimidate and alcohol **10** were azeotroped with toluene (3×), dried in high vacuum for at least 1 h and dissolved in dry dichloromethane. Molecular sieves (3 Å) were added and the mixture was stirred at ambient temperature for 20 min. Afterwards, TMSOTf was added dropwise at 0 °C and the reaction mixture was allowed to slowly warm to ambient temperature. The reaction was quenched by adding pyridine, the molecular sieves were filtered off through cotton and the solvent was removed under reduced pressure.

**General procedure 3 (GP3): Staudinger reduction/acylation**

To a solution of the azide in benzene were added triphenylphosphine and water and the suspension was heated to 60 °C (oil bath temperature). The solvents were removed under reduced pressure, the residue was azeotroped with toluene (3×) and dried in high vacuum for at least 1 h. The amine and the fatty acid were dissolved in dry THF and DIPEA was added. Afterwards, a solution of HATU in dry DMF was added dropwise at ambient temperature. The reaction was quenched by adding ethyl acetate and sat. aq. NaCl solution. The organic layer was washed with sat. aq. NaCl solution (2×) and the combined aqueous phases were reextracted with ethyl acetate. The combined organic layers were dried over Na<sub>2</sub>SO<sub>4</sub>, filtered and concentrated under reduced pressure.

**General procedure 4 (GP4): Zemplén deprotection**

To a solution of the protected carbohydrate in methanol/dichloromethane (3:1) a solution of sodium methoxide (5.4 M in MeOH) was added at ambient temperature until a pH value >12 was reached. The reaction was stirred at ambient temperature or at 50 °C, respectively, then neutralized with Amberlite®, filtered and concentrated in vacuo.

**General procedure 5 (GP5): Huisgen cycloaddition**

Glycolipid, dye **9** and Cu were added to a solution of water and *t*-butanol, an aqueous solution of CuSO<sub>4</sub>·5 H<sub>2</sub>O was added, and the reaction mixture was stirred for 2 d at ambient temperature. The suspension was filtered, and the solvent was removed under reduced pressure.

## SUPPORTING INFORMATION

Synthesis of fluorescently labeled Gb<sub>3</sub> species2-(Trimethylsilyl)ethyl-3,6-di-O-benzyl-2-O-(9-fluorenylmethoxycarbonyl)-β-D-galactopyranosyl-(1→4)-2,3,6-tri-O-benzyl-β-D-glucopyranoside (**33**)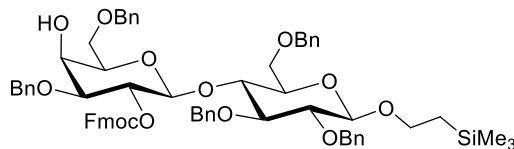

Glucopyranoside **19**<sup>[1]</sup> (100 mg, 0.182 mmol, 1.00 eq.) and galactosyl phosphate **18**<sup>[2]</sup> (195 mg, 0.218 mmol, 1.20 eq.) were azeotroped with toluene (3× 3.0 mL) and dried in high vacuo for 1 h. This mixture was dissolved in anhydrous dichloromethane (3.0 mL) and cooled to −40 °C. Then, TMSOTf (39.5 μL, 48.5 mg, 0.218 mmol, 1.20 eq.) was added dropwise. The reaction mixture was at −40 °C for 2 h. Afterwards the reaction was quenched by the addition of pyridine (0.5 mL), and the solvents were removed under reduced pressure. Column chromatography on silica gel (*n*-pentane/EtOAc, 8:1 → 5:1 → 4:1) afforded disaccharide **33** (132 mg, 0.118 mmol, 65 %) as a colorless foam.

$[\alpha]_{\text{D}}^{23} = +20.7$  (c 1.55, CHCl<sub>3</sub>).

**<sup>1</sup>H-NMR** (600 MHz, CDCl<sub>3</sub>): δ (ppm) = 0.04 (s, 9 H), 0.98–1.10 (m, 2 H), 2.35 (s, 1 H), 3.17 (ddd, *J* = 9.9, 3.7, 1.6 Hz, 1 H), 3.20–3.26 (m, 2 H), 3.33–3.39 (m, 2 H), 3.48–3.55 (m, 2 H), 3.57–3.63 (m, 2 H), 3.65 (dd, *J* = 11.1, 3.8 Hz, 1 H), 3.88 (dd, *J* = 9.9, 8.9 Hz, 1 H), 3.97–3.99 (m, 1 H), 4.02 (ddd, *J* = 11.0, 9.5, 6.8 Hz, 1 H), 4.21 (t, *J* = 6.5 Hz, 1 H), 4.30–4.34 (m, 2 H), 4.34 (d, *J* = 12.0 Hz, 1 H), 4.38 (d, *J* = 12.0 Hz, 1 H), 4.44 (d, *J* = 8.0 Hz, 1 H), 4.49 (dd, *J* = 10.8, 6.5 Hz, 1 H), 4.49 (d, *J* = 11.8 Hz, 1 H), 4.55 (dd, *J* = 10.6, 6.5 Hz, 1 H), 4.59 (d, *J* = 12.1 Hz, 1 H), 4.62 (d, *J* = 11.8 Hz, 1 H), 4.70 (d, *J* = 11.1 Hz, 1 H), 4.73 (d, *J* = 10.9 Hz, 1 H), 4.86–4.93 (m, 2 H), 4.93 (d, *J* = 10.9 Hz, 1 H), 7.13–7.35 (m, 27 H), 7.34–7.44 (m, 2 H), 7.59–7.61 (m, 2 H), 7.77 (ddt, *J* = 7.6, 4.9, 0.9 Hz, 2 H).

**<sup>13</sup>C-NMR** (151 MHz, CDCl<sub>3</sub>): δ (ppm) = −1.4, 18.5, 46.9, 65.5, 67.4, 67.9, 67.9, 69.4, 71.4, 72.8, 73.1, 73.5, 74.6, 74.9, 75.4, 75.8, 77.1, 78.8, 81.9, 82.8, 100.3, 103.1, 120.1, 120.1, 124.8, 124.9, 127.1, 127.1, 127.4, 127.5, 127.5, 127.6, 127.7, 127.8, 127.8, 127.9, 128.0, 128.0, 128.0, 128.2, 128.2, 128.4, 128.5, 137.4, 138.1, 138.3, 138.7, 139.2, 141.3, 141.4, 143.3, 143.5, 154.5.

**IR** (ATR):  $\tilde{\nu}$  (cm<sup>−1</sup>) = 3064, 3030, 2951, 2872, 1754, 1452, 1363, 1248, 1070, 986, 858, 836, 733, 696.

**MS** (ESI): *m/z* (%) = 1137.5 (100) [M+Na]<sup>+</sup>. **HRMS** (ESI): *m/z* calculated for: C<sub>87</sub>H<sub>74</sub>O<sub>13</sub>Si [M+Na]<sup>+</sup>: 1137.4791, found: 1137.4793.

## SUPPORTING INFORMATION

**2-(Trimethylsilyl)ethyl-2,4,3,6-tetra-O-benzyl- $\alpha$ -D-galactopyranosyl-(1 $\rightarrow$ 4)-3,6-di-O-benzyl-2-O-(9-fluorenylmethoxycarbonyl)- $\beta$ -D-galactopyranosyl-(1 $\rightarrow$ 4)-2,3,6-tri-O-benzyl- $\beta$ -D-glucopyranoside (**34**)**

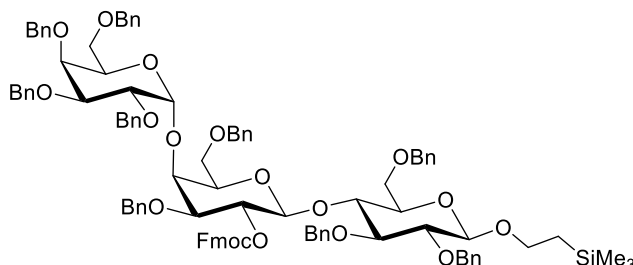

Disaccharide **33** (1.55 g, 1.39 mmol, 1.00 eq.) and trichloroacetimidate **17**<sup>[3]</sup> (1.24 g, 1.81 mmol, 1.30 eq.) were azeotroped with toluene (3 $\times$  20 mL) and dried in high vacuo for 1 h. The mixture was dissolved in anhydrous dichloromethane (44 mL) and diethyl ether (11 mL) and was cooled to  $-20$  °C. TMSOTf (38.0  $\mu$ L, 46.5 mg, 0.209 mmol, 15.0 mol%) was added. The reaction mixture was stirred at this temperature for 3 h. The reaction was stopped by the addition of pyridine (1.0 mL). The solvents were removed under reduced pressure. Column chromatography on silica gel (*n*-pentane/EtOAc, 8:1  $\rightarrow$  6:1  $\rightarrow$  5:1) afforded the target compound **34** (1.69 g, 1.03 mmol, 74 %) and the  $\beta$ -linked diastereomer (338 mg, 0.206 mmol, 15 %) as colorless oils.

$[\alpha]_D^{24} = +26.2$  (c 1.09, CHCl<sub>3</sub>).

**<sup>1</sup>H-NMR** (600 MHz, CDCl<sub>3</sub>):  $\delta$  (ppm) = 0.03 (s, 9 H), 0.99–1.09 (m, 2 H), 3.07 (dd,  $J = 8.9$ , 4.7 Hz, 1 H), 3.19–3.28 (m, 3 H), 3.33–3.40 (m, 2 H), 3.50 (t,  $J = 8.9$  Hz, 1 H), 3.55 (t,  $J = 9.2$  Hz, 1 H), 3.57–3.65 (m, 2 H), 3.73 (dd,  $J = 11.0$ , 4.0 Hz, 1 H), 3.90 (t,  $J = 9.2$  Hz, 1 H), 3.97 (d,  $J = 11.7$  Hz, 1 H), 4.00–4.06 (m, 2 H), 4.05–4.11 (m, 3 H), 4.11–4.18 (m, 3 H), 4.18–4.23 (m, 2 H), 4.29–4.38 (m, 3 H), 4.38–4.46 (m, 3 H), 4.45–4.52 (m, 2 H), 4.53–4.61 (m, 3 H), 4.68 (d,  $J = 11.0$  Hz, 1 H), 4.70–4.79 (m, 4 H), 4.82 (d,  $J = 11.1$  Hz, 1 H), 4.87 (d,  $J = 11.0$  Hz, 1 H), 4.96–5.07 (m, 3 H), 7.08–7.23 (m, 29 H), 7.22–7.33 (m, 16 H), 7.34–7.44 (m, 4 H), 7.54–7.58 (m, 2 H), 7.76–7.80 (m, 2 H).

**<sup>13</sup>C-NMR** (151 MHz, CDCl<sub>3</sub>):  $\delta$  (ppm) =  $-1.4$ , 18.5, 46.8, 67.2, 67.4, 67.6, 68.1, 69.0, 69.4, 71.6, 72.4, 72.9, 72.9, 73.1, 73.4, 73.7, 74.3, 74.7, 74.8, 74.9, 74.9, 75.3, 75.8, 76.2, 77.6, 79.5, 79.6, 81.9, 82.7, 100.8, 101.2, 103.1, 120.1, 120.1, 124.9, 125.0, 127.1, 127.2, 127.2, 127.2, 127.3, 127.4, 127.5, 127.5, 127.6, 127.7, 127.7, 127.9, 128.0, 128.0, 128.1, 128.1, 128.1, 128.1, 128.2, 128.2, 128.4, 138.1, 138.3, 138.3, 138.4, 138.7, 138.7, 138.7, 139.0, 139.1, 141.3, 141.4, 143.3, 143.5, 154.5.

**IR** (ATR):  $\tilde{\nu}$  (cm<sup>-1</sup>) = 3373, 3030, 2949, 2870, 1756, 1730, 1695, 1496, 1384, 1252, 1091, 1048, 833, 734, 695, 619.

**MS** (ESI):  $m/z$  (%) = 841.9 (100) [M+2Na]<sup>2+</sup>, 1660.7 (81) [M+Na]<sup>+</sup>. **HRMS** (ESI):  $m/z$  calculated for: C<sub>101</sub>H<sub>108</sub>O<sub>18</sub>Si [M+Na]<sup>+</sup>: 1659.7197, found: 1659.7195.

## SUPPORTING INFORMATION

**2-(Trimethylsilyl)ethyl-2,4,3,6-tetra-O-benzyl- $\alpha$ -D-galactopyranosyl-(1 $\rightarrow$ 4)-3,6-di-O-benzyl- $\beta$ -D-galactopyranosyl-(1 $\rightarrow$ 4)-2,3,6-tri-O-benzyl- $\beta$ -D-glucopyranoside (20)**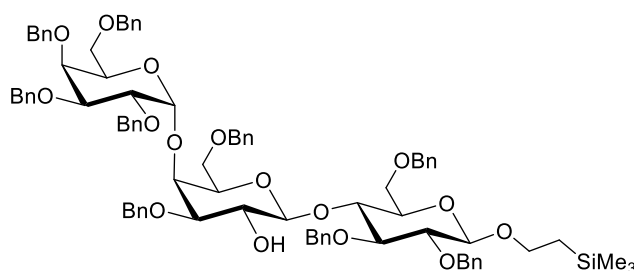

To a solution of fully protected trisaccharide **34** (862 mg, 0.526 mmol, 1.00 eq.) in anhydrous DMF (10.5 mL) was added piperidine (4.15 mL, 3.58 g, 42.1 mmol, 80.0 eq.) at ambient temperature. The reaction mixture was stirred for 20 h. The solvent was removed under reduced pressure. Column chromatography on silica gel (*n*-pentane/EtOAc, 10:1  $\rightarrow$  4:1  $\rightarrow$  3:1) afforded the target compound **20** (719 mg, 0.508 mmol, 97 %) as colorless foam.

$[\alpha]_D^{23} = +41.7$  (c 0.71, CHCl<sub>3</sub>).

**<sup>1</sup>H-NMR** (600 MHz, CDCl<sub>3</sub>):  $\delta$  (ppm) = 0.03 (s, 9 H), 1.03 (m, 2 H), 3.14–3.23 (m, 4 H), 3.25 (dd,  $J = 8.5, 6.1$  Hz, 1 H), 3.38 (dd,  $J = 9.1, 7.9$  Hz, 1 H), 3.47–3.53 (m, 2 H), 3.60 (ddd,  $J = 10.8, 9.5, 5.9$  Hz, 1 H), 3.65 (t,  $J = 9.1$  Hz, 1 H), 3.75 (dd,  $J = 10.0, 7.6$  Hz, 1 H), 3.84 (dd,  $J = 11.5, 1.9$  Hz, 1 H), 3.94–4.03 (m, 5 H), 4.03–4.08 (m, 3 H), 4.08–4.14 (m, 3 H), 4.37 (d,  $J = 7.9$  Hz, 1 H), 4.35–4.41 (m, 1 H), 4.45 (d,  $J = 12.7$  Hz, 1 H), 4.48 (d,  $J = 11.2$  Hz, 1 H), 4.56 (d,  $J = 7.6$  Hz, 1 H), 4.56–4.63 (m, 3 H), 4.65 (d,  $J = 11.0$  Hz, 1 H), 4.68 (d,  $J = 12.1$  Hz, 1 H), 4.68 (d,  $J = 12.0$  Hz, 1 H), 4.77 (d,  $J = 12.0$  Hz, 1 H), 4.78 (d,  $J = 12.7$  Hz, 1 H), 4.84–4.90 (m, 3 H), 4.97 (d,  $J = 11.4$  Hz, 1 H), 4.99 (d,  $J = 3.3$  Hz, 1 H), 7.05–7.40 (m, 45 H).

**<sup>13</sup>C-NMR** (151 MHz, CDCl<sub>3</sub>):  $\delta$  (ppm) = -1.4, 18.5, 67.3, 67.5, 67.8, 68.7, 69.2, 71.8, 72.4, 72.9, 73.1, 73.4, 73.6, 73.8, 73.8, 74.5, 74.9, 74.9, 76.4, 77.4, 79.3, 80.8, 82.3, 83.4, 100.7, 103.3, 104.0, 127.1, 127.2, 127.2, 127.2, 127.3, 127.4, 127.4, 127.5, 127.5, 127.6, 127.6, 127.8, 127.9, 128.0, 128.1, 128.1, 128.2, 128.2, 128.2, 128.2, 128.3, 128.3, 128.3, 128.4, 138.0, 138.1, 138.2, 138.5, 138.5, 138.7, 138.8, 139.0, 139.2.

**IR** (ATR):  $\tilde{\nu}$  (cm<sup>-1</sup>) = 3478, 3063, 2922, 2870, 1496, 1453, 1361, 1248, 1208, 1086, 1052, 910, 858, 733, 695.

**MS** (ESI):  $m/z$  (%) = 730.3 (85) [M+2Na]<sup>2+</sup>, 1438.7 (100) [M+Na]<sup>+</sup>. **HRMS** (ESI):  $m/z$  calculated for: C<sub>86</sub>H<sub>98</sub>SiO<sub>16</sub> [M+Na]<sup>+</sup>: 1437.6516, found: 1437.6516.

## SUPPORTING INFORMATION

**2-(Trimethylsilyl)ethyl-2,4,3,6-tetra-O-benzyl- $\alpha$ -D-galactopyranosyl-(1 $\rightarrow$ 4)-3,6-di-O-benzyl-2-O-pent-4-ene-1-yl- $\beta$ -D-galactopyranosyl-(1 $\rightarrow$ 4)-2,3,6-tri-O-benzyl- $\beta$ -D-glucopyranoside (35)**

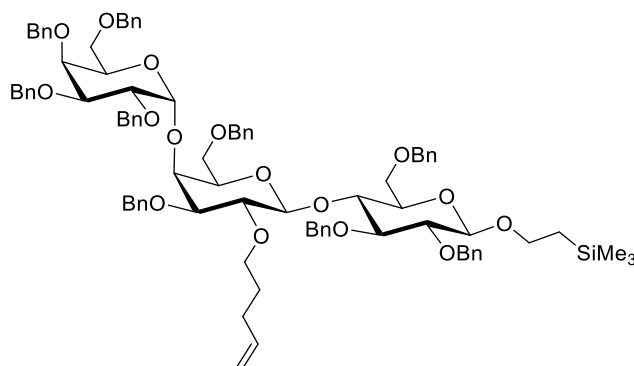

Sodium hydride (60 % in mineral oil, 178 mg, 4.45 mmol, 5.00 eq.) was washed with anhydrous cyclohexane (2 $\times$  10 mL). A solution of trisaccharide **20** (1.26 g, 0.890 mmol, 1.00 eq.) in anhydrous DMF (37.0 mL) which had been cooled to 0 °C was added. After 30 min 5-bromo-1-pentene (527  $\mu$ L, 663 mg, 4.45 mmol, 5.00 eq.) was added dropwise at 0 °C, a tiny amount of tetrabutylammonium iodide was added and the reaction mixture was stirred for 22 h at ambient temperature. The reaction was quenched by the addition of ethyl acetate (100 mL) and water (100 mL); the organic phase was washed with brine (2 $\times$  100 mL), dried over Na<sub>2</sub>SO<sub>4</sub>, filtered and concentrated in vacuo. The crude product was purified by column chromatography on silica gel (*n*-pentane/EtOAc, 5:1  $\rightarrow$  3:1) and the target compound **35** (1.17 g, 0.788 mmol, 89 %) was obtained as a colorless oil.

$[\alpha]_D^{23} = +35.2$  (c 0.91, CHCl<sub>3</sub>).

**<sup>1</sup>H-NMR** (600 MHz, CDCl<sub>3</sub>):  $\delta$  (ppm) = 0.02 (s, 9 H), 0.93–1.08 (m, 2 H), 1.59–1.68 (m, 2 H), 1.99–2.11 (m, 2 H), 3.13 (dd,  $J = 8.3, 4.6$  Hz, 1 H), 3.20 (dd,  $J = 10.0, 2.8$  Hz, 1 H), 3.28 (dd,  $J = 8.4, 5.2$  Hz, 1 H), 3.36 (dd,  $J = 9.3, 7.9$  Hz, 1 H), 3.37–3.42 (m, 2 H), 3.44–3.51 (m, 2 H), 3.51–3.61 (m, 2 H), 3.69 (dt,  $J = 9.2, 6.8$  Hz, 1 H), 3.75 (dt,  $J = 8.9, 6.8$  Hz, 1 H), 3.84–3.93 (m, 3 H), 3.93–4.02 (m, 4 H), 4.02–4.06 (m, 2 H), 4.10 (d,  $J = 11.5$  Hz, 1 H), 4.11–4.18 (m, 1 H), 4.22 (d,  $J = 11.8$  Hz, 1 H), 4.26 (d,  $J = 11.8$  Hz, 1 H), 4.33 (dd,  $J = 9.3, 4.6$  Hz, 1 H), 4.37 (d,  $J = 7.9$  Hz, 1 H), 4.39 (d,  $J = 7.7$  Hz, 1 H), 4.43 (d,  $J = 11.5$  Hz, 1 H), 4.43–4.51 (m, 4 H), 4.67 (d,  $J = 12.0$  Hz, 1 H), 4.68 (d,  $J = 11.0$  Hz, 1 H), 4.69–4.77 (m, 4 H), 4.84 (d,  $J = 11.3$  Hz, 1 H), 4.87 (d,  $J = 11.0$  Hz, 1 H), 4.89–4.95 (m, 1 H), 5.00 (ddd,  $J = 17.2, 3.4, 1.6$  Hz, 1 H), 5.03 (d,  $J = 3.4$  Hz, 1 H), 5.06 (d,  $J = 11.0$  Hz, 1 H), 5.73–5.83 (m, 1 H), 7.03–7.42 (m, 45 H).

**<sup>13</sup>C-NMR** (151 MHz, CDCl<sub>3</sub>):  $\delta$  (ppm) = -1.6, 18.3, 29.4, 29.5, 30.1, 67.2, 67.5, 67.6, 68.2, 69.1, 71.9, 72.2, 72.7, 72.8, 72.9, 73.0, 73.4, 74.6, 74.6, 74.7, 74.8, 75.0, 75.1, 76.4, 77.0, 77.0, 79.1, 79.5, 81.4, 81.6, 82.5, 100.5, 102.7, 102.9, 114.4, 126.9, 127.1, 127.1, 127.2, 127.2, 127.2, 127.2, 127.3, 127.3, 127.4, 127.6, 127.9, 127.9, 127.9, 127.9, 127.9, 128.0, 128.0, 128.0, 128.0, 128.1, 128.1, 128.2, 137.9, 138.2, 138.2, 138.3, 138.5, 138.6, 138.6, 138.7, 138.9.



## SUPPORTING INFORMATION

**IR** (ATR):  $\tilde{\nu}$  (cm<sup>-1</sup>) = 3063, 2921, 2868, 1496, 1453, 1361, 1091, 1072, 1051, 859, 836, 732, 696.

**MS** (ESI):  $m/z$  (%) = 764.9 (67) [M+2Na]<sup>2+</sup>, 1506.7 (100) [M+Na]<sup>+</sup>. **HRMS** (ESI):  $m/z$  calculated for: C<sub>91</sub>H<sub>106</sub>O<sub>16</sub>Si [M+Na]<sup>+</sup>: 1505.7142, found: 1505.7143.

**2-(Trimethylsilyl)ethyl-2,4,3,6-tetra-O-benzoyl- $\alpha$ -D-galactopyranosyl-(1 $\rightarrow$ 4)-3,6-di-O-benzoyl-2-O-pent-4-ene-1-yl- $\beta$ -D-galactopyranosyl-(1 $\rightarrow$ 4)-2,3,6-tri-O-benzoyl- $\beta$ -D-glucopyranoside (36)**

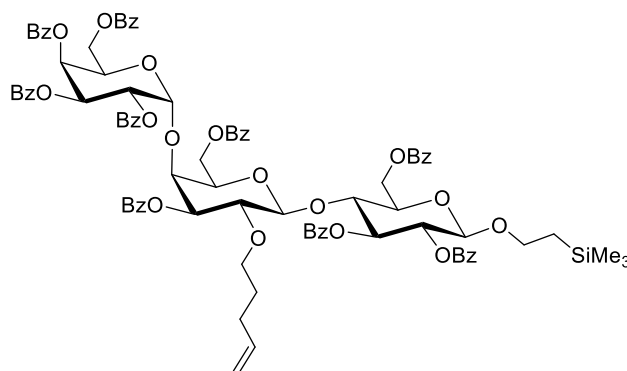

Into a three-necked round bottom flask equipped with dry ice reflux condenser and stirring bar covered with glass ammonia was condensed at  $-60$  °C. Tiny pieces of sodium (ACROS, 99.8 %) which had been washed before with *n*-pentane were added until the blue color of the solution remained. By careful and slow warming the pre-dried ammonia was transferred (evaporation and condensation) into the reaction vessel and cooled to  $-60$  °C. Again, tiny pieces of sodium were added until the blue color remained. Then a solution of trisaccharide **35** (85.0 mg, 57.3  $\mu$ mol, 1.00 eq.) in anhydrous THF (12.0 mL) was added dropwise. In the case of disappearing color more sodium was added. After 15 min methanol was added dropwise until the blue color disappeared. After that sodium was added again (until the blue color remained); the reaction was stopped by the slow addition of methanol (several mL). The cooling bath and the dry ice cooling funnel were removed. The reaction was first placed in an ice bath; after most of the ammonia was evaporated, the ice bath was substituted by warm water to remove all traces of ammonia. The solution was neutralized with Amberlite® and filtered. Amberlite® was carefully washed with methanol. The solvents were removed under reduced pressure and the crude product was azeotroped with toluene (3 $\times$  5 mL) and dried in high vacuo for at least 1 h.

The deprotected trisaccharide was dissolved in anhydrous pyridine (1.2 mL), benzoyl chloride (99.2  $\mu$ L, 121 mg, 0.860 mmol, 15.0 eq.) and DMAP (63.1 mg, 0.516 mmol, 9.00 eq.) were added at ambient temperature. After 24 h another portion benzoyl chloride (99.2  $\mu$ L, 121 mg, 0.860 mmol, 15.0 eq.) was added and the reaction mixture was stirred for another 4 d. The reaction was stopped by adding EtOAc (25 mL) and brine (25 mL). The aqueous phase was extracted with EtOAc (25 mL), the combined organic phases were dried over Na<sub>2</sub>SO<sub>4</sub>, filtered and concentrated in vacuo. Gel permeation HPLC followed by subsequent purification by

## SUPPORTING INFORMATION

column chromatography on silica gel (*n*-pentane/EtOAc, 3:1) yielded the target compound **36** (77.5 mg, 48.1 mmol, 84 %) as a colorless oil.

$[\alpha]_D^{24} = +60.0$  (*c* 1.06, CHCl<sub>3</sub>).

**<sup>1</sup>H-NMR** (600 MHz, CDCl<sub>3</sub>):  $\delta$  (ppm) = -0.11 (s, 9 H), 0.79–0.93 (m, 2 H), 1.31–1.43 (m, 2 H), 1.67–1.77 (m, 1 H), 1.78–1.88 (m, 1 H), 3.49–3.55 (m, 1 H), 3.54–3.59 (m, 2 H), 3.65 (dd, *J* = 10.3, 7.5 Hz, 1 H), 3.69–3.74 (m, 1 H), 3.95 (ddd, *J* = 10.6, 9.6, 5.7 Hz, 1 H), 3.99 (ddd, *J* = 9.6, 5.4, 2.1 Hz, 1 H), 4.05–4.15 (m, 3 H), 4.18 (d, *J* = 3.0 Hz, 1 H), 4.24 (t, *J* = 9.6 Hz, 1 H), 4.40 (dd, *J* = 11.1, 5.6 Hz, 1 H), 4.57 (d, *J* = 7.5 Hz, 1 H), 4.59 (dd, *J* = 11.9, 5.4 Hz, 1 H), 4.58 (dd, *J* = 9.6, 7.0 Hz, 1 H), 4.63–4.69 (mc, 1 H), 4.68–4.74 (m, 1 H), 4.75 (d, *J* = 7.9 Hz, 1 H), 4.92 (dd, *J* = 11.9, 2.1 Hz, 1 H), 5.04 (dd, *J* = 10.3, 3.0 Hz, 1 H), 5.42 (dd, *J* = 9.5, 7.9 Hz, 1 H), 5.46 (d, *J* = 3.6 Hz, 1 H), 5.45–5.55 (m, 1 H), 5.65 (dd, *J* = 10.9, 3.6 Hz, 1 H), 5.79 (t, *J* = 9.6 Hz, 1 H), 5.83 (dd, *J* = 10.9, 3.4 Hz, 1 H), 6.02 (dd, *J* = 3.4, 1.6 Hz, 1 H), 7.18–7.25 (m, 2 H), 7.30–7.45 (m, 18 H), 7.45–7.55 (m, 6 H), 7.71–7.85 (m, 6 H), 7.91–8.15 (m, 13 H)

**<sup>13</sup>C-NMR** (75 MHz, CDCl<sub>3</sub>):  $\delta$  (ppm) = -1.4, 18.0, 29.3, 29.9, 61.5, 61.9, 63.0, 67.5, 67.7, 68.1, 69.2, 70.1, 72.4, 72.5, 73.1, 73.3, 73.6, 75.2, 75.5, 77.4, 77.7, 98.1, 100.5, 103.1, 114.6, 128.4, 128.5, 128.5, 128.5, 128.7, 128.8, 129.3, 129.3, 129.4, 129.5, 129.6, 129.7, 129.7, 129.8, 129.9, 130.0, 130.0, 130.0, 130.0, 133.1, 133.2, 133.2, 133.3, 133.3, 133.6, 133.7, 138.1, 165.3, 165.3, 165.3, 165.4, 165.7, 165.8, 166.0, 166.2.

**IR** (ATR):  $\tilde{\nu}$  (cm<sup>-1</sup>) = 2952, 2926, 2871, 1723, 1602, 1451, 1315, 1264, 1091, 1066, 1026, 856, 837, 706.

**MS** (ESI): *m/z* (%) = 827.8 (40) [M+2Na]<sup>2+</sup>, 1632.5 (100) [M+Na]<sup>+</sup>. **HRMS** (ESI): *m/z* calculated for: C<sub>91</sub>H<sub>88</sub>O<sub>25</sub>Si [M+Na]<sup>+</sup>: 1631.5276, found: 1631.5276.

**2-(Trimethylsilyl)ethyl-2,4,3,6-tetra-O-benzoyl- $\alpha$ -D-galactopyranosyl-(1 $\rightarrow$ 4)-3,6-di-O-benzoyl-2-O-(5-thioacetyl)pent-1-yl- $\beta$ -D-galactopyranosyl-(1 $\rightarrow$ 4)-2,3,6-tri-O-benzoyl- $\beta$ -D-glucopyranoside (**37**)**

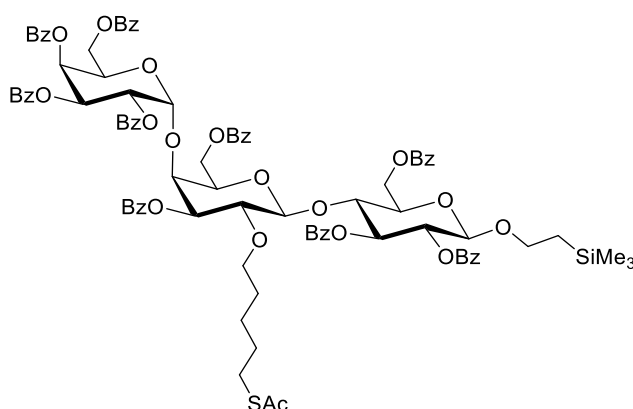

Trisaccharide **36** (99.0 mg, 61.4  $\mu$ mol, 1.00 eq.) was dissolved in degassed THF (20 mL). Thioacetic acid (43.2  $\mu$ L, 46.7 mg, 0.614 mmol, 10.0 eq.) and a tiny amount of recrystallized

## SUPPORTING INFORMATION

AIBN were added. The reaction mixture was heated to reflux in a preheated oil bath (100 °C). After 6 h again a tiny amount of AIBN and thioacetic acid (43.2  $\mu$ L, 46.7 mg, 0.614 mmol, 10.0 eq.) were added. In total the mixture was stirred for 24 h under reflux. Afterwards, the solvent was removed under reduced pressure. Column chromatography on silica gel (*n*-pentane/EtOAc, 3:1  $\rightarrow$  2:1) afforded the target compound **37** (91.7 mg, 54.3  $\mu$ mol, 88 %) as a colorless foam.

$[\alpha]_D^{21} = +44.0$  (c 1.18, CHCl<sub>3</sub>).

**<sup>1</sup>H-NMR** (600 MHz, CDCl<sub>3</sub>):  $\delta$  (ppm) = -0.11 (s, 9 H), 0.80–0.93 (m, 3 H), 1.15–1.37 (m, 5 H), 2.26 (s, 3 H), 2.46–2.58 (m, 2 H), 3.44 (dt,  $J = 9.2, 6.9$  Hz, 1 H), 3.52–3.59 (m, 2 H), 3.62 (dd,  $J = 10.3, 7.5$  Hz, 1 H), 3.70 (dt,  $J = 9.2, 6.1$  Hz, 1 H), 3.95 (ddd,  $J = 10.7, 9.7, 5.6$  Hz, 1 H), 4.00 (ddd,  $J = 9.6, 5.3, 2.2$  Hz, 1 H), 4.06–4.18 (m, 4 H), 4.25 (t,  $J = 9.6$  Hz, 1 H), 4.44 (dd,  $J = 11.2, 5.6$  Hz, 1 H), 4.56 (d,  $J = 7.5$  Hz, 1 H), 4.56 (dd,  $J = 11.9, 5.3$  Hz, 1 H), 4.65 (ddd,  $J = 7.3, 5.6, 1.5$  Hz, 1 H), 4.76 (d,  $J = 7.8$  Hz, 1 H), 4.91 (dd,  $J = 11.9, 2.2$  Hz, 1 H), 5.05 (dd,  $J = 10.3, 2.9$  Hz, 1 H), 5.42 (dd,  $J = 9.5, 7.8$  Hz, 1 H), 5.47 (d,  $J = 3.5$  Hz, 1 H), 5.64 (dd,  $J = 10.9, 3.5$  Hz, 1 H), 5.79 (t,  $J = 9.6$  Hz, 1 H), 5.83 (dd,  $J = 10.9, 3.4$  Hz, 1 H), 6.01 (dd,  $J = 3.4, 1.5$  Hz, 1 H), 7.19–7.26 (m, 3 H), 7.31–7.46 (m, 18 H), 7.47–7.55 (m, 5 H), 7.73–7.87 (m, 6 H), 7.92–8.15 (m, 13 H).

**<sup>13</sup>C-NMR** (151 MHz, CDCl<sub>3</sub>):  $\delta$  (ppm) = -1.5, 17.9, 25.2, 28.8, 29.1, 29.5, 30.6, 61.4, 61.8, 62.9, 67.4, 67.6, 67.9, 69.1, 69.9, 72.3, 72.4, 73.0, 73.4, 73.5, 74.8, 75.3, 76.5, 77.5, 97.9, 100.4, 102.9, 128.3, 128.4, 128.4, 128.4, 128.4, 128.5, 128.6, 128.7, 129.1, 129.2, 129.2, 129.4, 129.5, 129.6, 129.6, 129.6, 129.7, 129.8, 129.8, 129.9, 129.9, 133.0, 133.1, 133.1, 133.2, 133.2, 133.5, 133.6, 165.2, 165.2, 165.6, 165.9, 195.8.

**IR** (ATR):  $\tilde{\nu}$  (cm<sup>-1</sup>) = 3066, 2949, 2869, 1722, 1688, 1602, 1451, 1261, 1091, 1066, 1025, 855, 837, 705.

**MS** (ESI):  $m/z$  (%) = 865.8 (61) [M+2Na]<sup>2+</sup>, 1708.5 (100) [M+Na]<sup>+</sup>. **HRMS** (ESI):  $m/z$  calculated for: C<sub>93</sub>H<sub>92</sub>O<sub>26</sub>SiS [M+Na]<sup>+</sup>: 1707.5259, found: 1707.5271.

## SUPPORTING INFORMATION

**2-(Trimethylsilyl)ethyl-2,4,3,6-tetra-O-benzoyl- $\alpha$ -D-galactopyranosyl-(1 $\rightarrow$ 4)-3,6-di-O-benzoyl-2-O-(9,12,15,18,21,24,27,30,33,36,39,42,45-tridecaoxa-6-thiaoctatetracont-47-yne-1-yl)- $\beta$ -D-galactopyranosyl-(1 $\rightarrow$ 4)-2,3,6-tri-O-benzoyl- $\beta$ -D-glucopyranoside (**38**)**

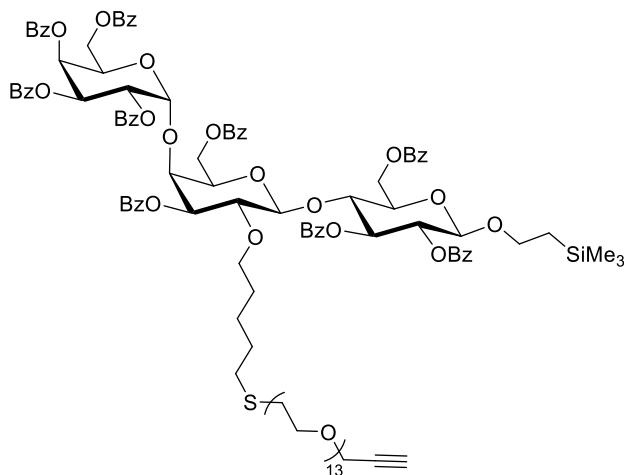

To a solution of thioester **37** (156 mg, 92.5  $\mu$ mol, 1.00 eq.) in a mixture of degassed methanol (3.7 mL) and chloroform (1.2 mL)  $K_2CO_3$  (12.8 mg, 92.5  $\mu$ mol, 1.00 eq.) was added. The reaction mixture was stirred at ambient temperature for 1 h. The solution was neutralized by the addition of Amberlite®, filtered and concentrated in vacuo. The residue was taken up in water (5.8 mL) and a solution of bromide **21** (76.8 mg, 0.111 mmol, 1.20 eq.) in THF (11.6 mL) was added. Sodium hydroxide (0.5 M in  $H_2O$ , 185  $\mu$ L, 92.5  $\mu$ mol, 1.00 Äq) and a tiny amount of tetrabutylammonium iodide were added. The reaction mixture was stirred for 2 d at ambient temperature. The reaction mixture was neutralized by addition of Amberlite®, filtered and the solvents were removed under reduced pressure. The resulting product was azeotroped with toluene (3 $\times$  2.5 mL) and dried in high vacuo for 1 h. Pyridine (1.9 mL), benzoyl chloride (160  $\mu$ L, 195 mg, 1.39 mmol, 15.0 eq.) and DMAP (56.6 mg, 0.463 mmol, 5.00 eq.) were added and the reaction mixture was stirred at ambient temperature for 1 d. Then again benzoyl chloride (160  $\mu$ L, 195 mg, 1.39 mmol, 15.0 eq.) was added and the reaction mixture was stirred for further 4 d at ambient temperature. The reaction was stopped by the addition of ethyl acetate (50 mL) and water (50 mL). The organic phase was washed with brine (50 mL), dried over  $Na_2SO_4$ , filtered and concentrated in vacuo. Gel permeation HPLC and subsequent column chromatography on silica gel (*n*-pentane/EtOAc, 2:1  $\rightarrow$   $CH_2Cl_2$ /MeOH, 30:1  $\rightarrow$  20:1) afforded the target compound **38** (103 mg, 45.7  $\mu$ mol, 49 %) as a colorless oil.

$[\alpha]_D^{21} = +38.9$  (c 0.85,  $CHCl_3$ ).

**$^1H$ -NMR** (600 MHz,  $CDCl_3$ ):  $\delta$  (ppm) = -0.11 (s, 9 H), 0.79–0.93 (m, 3 H), 1.15–1.33 (m, 5 H), 2.11–2.22 (m, 2 H), 2.44 (t,  $J = 2.4$  Hz, 1 H), 2.57 (t,  $J = 7.2$  Hz, 2 H), 3.40–3.73 (m, 55 H), 3.91–3.99 (m, 1 H), 4.00 (ddd,  $J = 10.0, 5.3, 2.1$  Hz, 1 H), 4.05–4.14 (m, 3 H), 4.16 (d,  $J = 2.9$  Hz, 1 H), 4.20 (d,  $J = 2.4$  Hz, 2 H), 4.24 (t,  $J = 9.5$  Hz, 1 H), 4.44 (dd,  $J = 11.2, 5.6$  Hz, 1 H), 4.51–4.59 (m, 2 H), 4.65 (t,  $J = 6.7$  Hz, 1 H), 4.75 (d,  $J = 7.8$  Hz, 1 H), 4.88–4.93 (m, 1 H), 5.05 (dd,  $J = 10.4, 2.8$  Hz, 1 H), 5.42 (dd,  $J = 9.7, 7.8$  Hz, 1 H), 5.47 (d,  $J = 3.5$  Hz, 1 H), 5.64 (dd,  $J = 10.8,$

## SUPPORTING INFORMATION

3.4 Hz, 1 H), 5.79 (t,  $J = 9.4$  Hz, 1 H), 5.82 (dd,  $J = 10.9, 3.4$  Hz, 1 H), 6.01 (d,  $J = 3.7$  Hz, 1 H), 7.17–7.25 (m, 4 H), 7.31–7.60 (m, 23 H), 7.73–7.86 (m, 6 H), 7.90–8.14 (m, 12 H).

$^{13}\text{C-NMR}$  (151 MHz,  $\text{CDCl}_3$ ):  $\delta$  (ppm) = -1.5, 17.9, 25.3, 29.5, 29.7, 31.2, 32.1, 58.4, 61.4, 61.8, 62.9, 67.4, 67.6, 67.9, 69.1, 69.1, 69.9, 70.2, 70.4, 70.6, 70.8, 72.2, 72.4, 73.0, 73.4, 73.7, 74.6, 74.8, 75.3, 76.5, 77.6, 79.7, 97.9, 100.4, 103.0, 128.3, 128.4, 128.4, 128.4, 128.5, 128.6, 128.7, 129.1, 129.2, 129.2, 129.3, 129.5, 129.6, 129.6, 129.6, 129.8, 129.8, 129.9, 129.9, 133.0, 133.1, 133.1, 133.2, 133.2, 133.5, 133.7, 165.2, 165.2, 165.2, 165.3, 165.6, 165.7, 165.8, 165.9, 166.1.

**IR** (ATR):  $\tilde{\nu}$  ( $\text{cm}^{-1}$ ) = 2868, 1723, 1601, 1451, 1264, 1251, 1091, 1067, 1026, 855, 838, 708.

**MS** (ESI):  $m/z$  (%) = 1149.9 (100)  $[\text{M}+2\text{Na}]^{2+}$ , 2276.9 (84)  $[\text{M}+\text{Na}]^+$ . **HRMS** (ESI):  $m/z$  calculated for:  $\text{C}_{120}\text{H}_{144}\text{O}_{38}\text{SiS}$   $[\text{M}+\text{Na}]^+$ : 2275.8718, found: 2275.8722.

**2-(Trimethylsilyl)ethyl-2,4,3,6-tetra-O-benzoyl- $\alpha$ -D-galactopyranosyl-(1 $\rightarrow$ 4)-3,6-di-O-benzoyl-2-O-(9,12,15-trioxa-6-thiaoctadec-17-yne)-1-yl- $\beta$ -D-galactopyranosyl-(1 $\rightarrow$ 4)-2,3,6-tri-O-benzoyl- $\beta$ -D-glucopyranoside (39)**

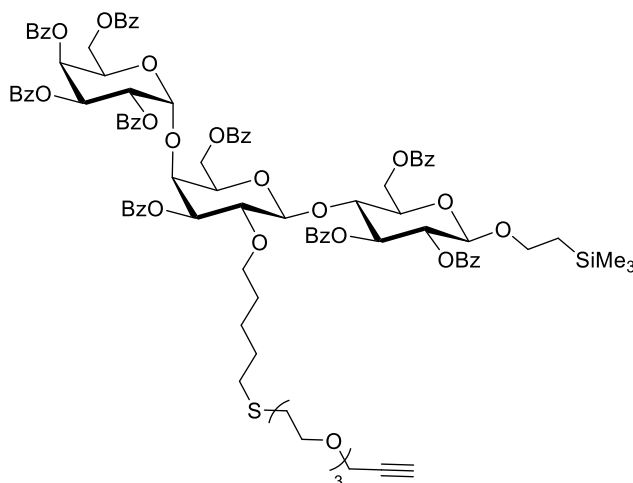

To a solution of thioester **37** (128 mg, 75.9  $\mu\text{mol}$ , 1.00 eq.) in a mixture of degassed methanol (5.7 mL) and chloroform (1.9 mL) was added  $\text{K}_2\text{CO}_3$  (10.5 mg, 75.9  $\mu\text{mol}$ , 1.00 eq.). The reaction mixture was stirred at ambient temperature for 1 h. The solution was neutralized by the addition of Amberlite®, filtered and concentrated in vacuo. The residue was taken up in water (4.7 mL) and a solution of bromide **22** (26.6 mg, 0.106 mmol, 1.40 eq.) in THF (9.5 mL) was added. Sodium hydroxide (0.5 M, 152  $\mu\text{L}$ , 75.9  $\mu\text{mol}$ , 1.00 eq.) and a tiny amount of tetrabutylammonium iodide were added. The reaction mixture was stirred for 2 d at ambient temperature. The mixture was neutralized by addition of Amberlite®, filtered and the solvents were removed under reduced pressure. The resulting product was azeotroped with toluene ( $3 \times 2.5$  mL) and dried in high vacuo for 1 h. Pyridine (1.5 mL), benzoyl chloride (133  $\mu\text{L}$ , 160 mg, 1.14 mmol, 15.0 eq.) and DMAP (83.5 mg, 0.683 mmol, 9.00 eq.) were added and the reaction mixture was stirred at ambient temperature for 1 d. Then again benzoyl chloride (133  $\mu\text{L}$ , 160 mg, 1.14 mmol, 15.0 eq.) was added and the reaction mixture was stirred for further 4 d at ambient temperature. The reaction was stopped by the addition of ethyl acetate (50 mL) and

## SUPPORTING INFORMATION

water (50 mL). The organic phase was washed with brine (50 mL), dried over Na<sub>2</sub>SO<sub>4</sub>, filtered and concentrated in vacuo. Gel permeation HPLC and subsequent column chromatography (SiO<sub>2</sub>, *n*-pentane/EtOAc, 2:1) afforded target compound **39** (69.2 mg, 38.1 mmol, 50 %) as a colorless oil.

$[\alpha]_D^{23} = +47.0$  (c 1.00, CHCl<sub>3</sub>).

**<sup>1</sup>H-NMR** (600 MHz, CDCl<sub>3</sub>):  $\delta$  (ppm) = -0.11 (s, 9 H), 0.79–0.89 (m, 1 H), 0.85–0.95 (m, 1 H), 0.94–1.04 (m, 1 H), 1.04–1.17 (m, 1 H), 1.17–1.32 (m, 4 H), 2.10–2.24 (m, 2 H), 2.43 (t,  $J = 2.4$  Hz, 1 H), 2.53–2.61 (m<sub>c</sub>, 2 H), 3.38–3.49 (m, 1 H), 3.51–3.74 (m, 14 H), 3.95 (ddd,  $J = 10.7, 9.6, 5.7$  Hz, 1 H), 4.00 (ddd,  $J = 9.8, 5.3, 2.1$  Hz, 1 H), 4.06–4.18 (m, 4 H), 4.19 (d,  $J = 2.4$  Hz, 2 H), 4.25 (t,  $J = 9.5$  Hz, 1 H), 4.45 (dd,  $J = 11.2, 5.7$  Hz, 1 H), 4.53–4.60 (m, 2 H), 4.62–4.69 (m<sub>c</sub>, 1 H), 4.75 (d,  $J = 7.8$  Hz, 1 H), 4.91 (dd,  $J = 11.9, 2.2$  Hz, 1 H), 5.06 (dd,  $J = 10.3, 2.9$  Hz, 1 H), 5.42 (dd,  $J = 9.7, 7.9$  Hz, 1 H), 5.47 (d,  $J = 3.5$  Hz, 1 H), 5.65 (dd,  $J = 10.8, 3.5$  Hz, 1 H), 5.75–5.86 (m, 2 H), 6.01 (dd,  $J = 3.4, 1.5$  Hz, 1 H), 7.17–7.26 (m, 3 H), 7.32–7.46 (m, 18 H), 7.48–7.61 (m, 6 H), 7.74–7.87 (m, 6 H), 7.91–8.14 (m, 12 H).

**<sup>13</sup>C-NMR** (126 MHz, CDCl<sub>3</sub>):  $\delta$  (ppm) = -1.5, 17.9, 25.3, 29.5, 29.7, 31.2, 32.1, 58.4, 61.4, 61.8, 62.8, 67.4, 67.6, 67.9, 69.0, 69.1, 69.9, 70.2, 70.4, 70.6, 70.8, 72.2, 72.4, 73.0, 73.4, 73.7, 74.5, 74.8, 75.3, 76.5, 77.6, 79.6, 97.9, 100.4, 103.0, 128.2, 128.3, 128.4, 128.4, 128.4, 128.6, 128.7, 129.1, 129.2, 129.2, 129.3, 129.4, 129.5, 129.6, 129.6, 129.7, 129.8, 129.8, 133.0, 133.1, 133.1, 133.1, 133.2, 133.4, 133.6, 165.1, 165.2, 165.2, 165.3, 165.5, 165.7, 165.8, 165.8, 166.1.

**IR** (ATR):  $\tilde{\nu}$  (cm<sup>-1</sup>) = 3066, 2947, 2867, 1722, 1602, 1584, 1451, 1352, 1261, 1091, 1065, 1026, 838, 706.

**MS** (ESI):  $m/z$  (%) = 929.8 (68) [M+2Na]<sup>2+</sup>, 1835.6 (100) [M+Na]<sup>+</sup>. **HRMS** (ESI):  $m/z$  calculated for: C<sub>100</sub>H<sub>104</sub>O<sub>28</sub>SSi [M+Na]<sup>+</sup>: 1835.6096, found: 1835.6096.

## SUPPORTING INFORMATION

**2,4,3,6-Tetra-O-benzoyl- $\alpha$ -D-galactopyranosyl-(1 $\rightarrow$ 4)-3,6-di-O-benzoyl-2-O-(9,12,15,18,21,24,27,30,33,36,39,42,45-tridecaoxa-6-thiaoctatetracont-47-yne-1-yl)- $\beta$ -D-galactopyranosyl-(1 $\rightarrow$ 4)-2,3,6-tri-O-benzoyl- $\beta$ -D-glucopyranosyl trichloroacetimidate (15)**

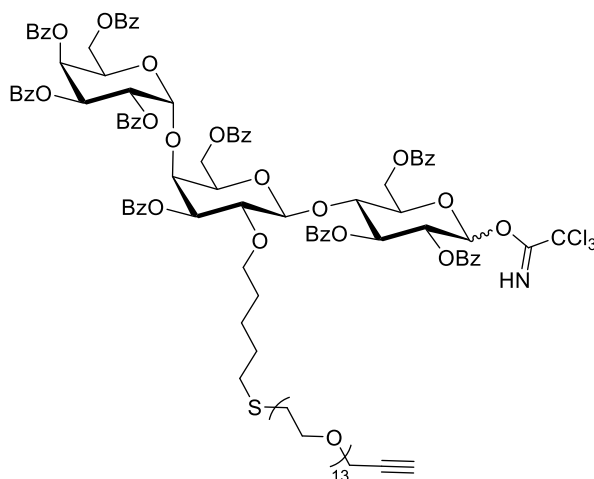

The anomeric hydroxyl group of carbohydrate **38** was deprotected according to general procedure **GP1** using anhydrous dichloromethane (4.4 mL) and TFA (2.2 mL). The reaction was stopped after 2 h. The crude hemiacetal was reacted with trichloroacetonitrile (88.2  $\mu$ L, 127 mg, 0.878 mmol, 20.0 eq.) and DBU (8.00  $\mu$ L, 8.12 mg, 52.7  $\mu$ mol, 1.20 eq.) in anhydrous dichloromethane (4.4 mL) for 2 h. Gel permeation HPLC afforded trichloroacetimidate **15** (74.0 mg, 32.2  $\mu$ mol, 73 %) as a yellow oil.

**$^1\text{H-NMR}$**  (600 MHz,  $\text{CDCl}_3$ ):  $\delta$  (ppm) = 0.76–0.90 (m), 1.12–1.34 (m), 2.05–2.27 (m), 2.44 (t,  $J = 2.4$  Hz), 2.56 (t,  $J = 7.2$  Hz), 3.26–3.46 (m), 3.48–3.75 (m), 4.05 (dd,  $J = 11.3, 6.7$  Hz), 4.10–4.18 (m), 4.20 (d,  $J = 2.4$  Hz), 4.34–4.41 (m), 4.41 (dd,  $J = 11.3, 6.1$  Hz), 4.51 (dd,  $J = 10.8, 4.1$  Hz), 4.55–4.63 (m), 4.86–4.93 (m), 5.06 (dd,  $J = 10.3, 2.9$  Hz), 5.47 (d,  $J = 3.5$  Hz), 5.50 (ddd,  $J = 10.2, 3.7, 1.0$  Hz), 5.63 (dd,  $J = 10.8, 3.5$  Hz), 5.76 (dd,  $J = 10.9, 3.4$  Hz), 5.89–5.96 (m), 6.19–6.28 (m), 6.76 (d,  $J = 3.7$  Hz), 7.18–7.25 (m), 7.33–7.61 (m), 7.69–7.87 (m), 7.92–8.16 (m), 8.59 (s), 8.60 (s).

**$^{13}\text{C-NMR}$**  (151 MHz,  $\text{CDCl}_3$ ):  $\delta$  (ppm) = 25.0, 25.4, 29.0, 29.6, 29.8, 29.9, 31.3, 32.2, 38.4, 58.5, 61.4, 61.4, 62.3, 62.3, 67.9, 68.0, 69.2, 70.0, 70.4, 70.4, 70.5, 70.7, 70.7, 70.8, 70.9, 70.9, 70.9, 71.9, 72.6, 73.7, 73.8, 74.7, 75.1, 75.7, 75.8, 77.6, 79.8, 90.9, 93.2, 97.9, 97.9, 103.4, 103.4, 103.5, 128.4, 128.5, 128.6, 128.6, 128.7, 128.7, 128.8, 128.9, 129.2, 129.3, 129.5, 129.6, 129.7, 129.7, 129.8, 129.9, 130.0, 130.1, 130.1, 133.3, 133.3, 133.3, 133.6, 133.6, 133.7, 133.8, 133.9, 160.6, 165.2, 165.3, 165.3, 165.7, 165.7, 165.9, 166.2.

**IR** (ATR):  $\tilde{\nu}$  ( $\text{cm}^{-1}$ ) = 2919, 2869, 1723, 1451, 1263, 1092, 1067, 1026, 840, 798, 752, 708, 668, 640.

**MS** (ESI):  $m/z$  (%) = 1170.8 (100)  $[\text{M}+2\text{Na}]^{2+}$ , 2318.7 (14)  $[\text{M}+\text{Na}]^+$ . **HRMS** (ESI):  $m/z$  calculated for:  $\text{C}_{117}\text{H}_{132}^{35}\text{Cl}_3\text{NO}_{38}\text{S}$   $[\text{M}+\text{Na}]^+$ : 2318.7106, found: 2318.7091.

## SUPPORTING INFORMATION

**2,4,3,6-Tetra-O-benzoyl- $\alpha$ -D-galactopyranosyl-(1 $\rightarrow$ 4)-3,6-di-O-benzoyl-2-O-(9,12,15-trioxa-6-thiaoctadec-17-yne-1-yl)- $\beta$ -D-galactopyranosyl-(1 $\rightarrow$ 4)-2,3,6-tri-O-benzoyl- $\beta$ -D-glucopyranosyl trichloroacetimidate (**16**)**

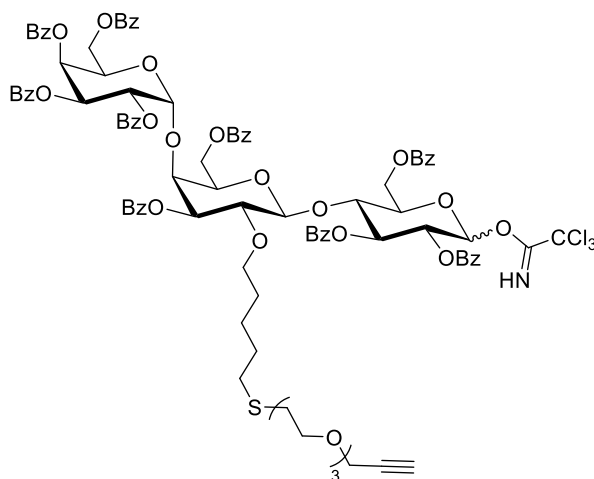

The anomeric hydroxyl group of carbohydrate **39** (63.4 mg, 34.9  $\mu$ mol, 1.00 eq.) was deprotected according to general procedure **GP1** using anhydrous dichloromethane (3.5 mL) and TFA (1.7 mL). The reaction was stopped after 3 h. The crude hemiacetal was reacted with trichloroacetonitrile (70.1  $\mu$ L, 101 mg, 0.698 mmol, 20.0 eq.) and DBU (6.25  $\mu$ L, 6.38 mg, 52.7  $\mu$ mol, 1.20 eq.) in anhydrous dichloromethane (3.5 mL) for 2 h. Gel permeation HPLC afforded trichloroacetimidate **16** (59.0 mg, 31.8  $\mu$ mol, 91 %) as a yellow oil.

**$^1\text{H-NMR}$**  (600 MHz,  $\text{CDCl}_3$ ):  $\delta$  (ppm) = 0.75–0.92 (m), 0.92–1.00 (m), 1.01–1.13 (m), 1.14–1.38 (m), 2.04–2.23 (m), 2.38–2.46 (m), 2.52–2.61 (m), 3.37–3.43 (m), 3.49–3.73 (m), 4.05 (dd,  $J$  = 11.3, 6.8 Hz), 4.11–4.19 (m), 4.19 (dd,  $J$  = 2.4 Hz), 4.35–4.44 (m), 4.51 (ddd,  $J$  = 10.1, 3.9, 1.7 Hz), 4.56–4.65 (m), 4.87–4.93 (m), 5.06 (dd,  $J$  = 10.3, 2.8 Hz), 5.47 (d,  $J$  = 3.6 Hz), 5.50 (dd,  $J$  = 10.3, 3.7 Hz), 5.60–5.66 (m), 5.77 (dd,  $J$  = 10.8, 3.4 Hz), 5.91–5.96 (m), 6.20–6.26 (m), 6.76 (d,  $J$  = 3.7 Hz), 7.12–7.25 (m), 7.33–7.60 (m), 7.72–7.86 (m), 7.91–8.18 (m), 8.53 (s), 8.60 (s).

**$^{13}\text{C-NMR}$**  (151 MHz,  $\text{CDCl}_3$ ):  $\delta$  (ppm) = 25.0, 29.2, 29.5, 31.0, 31.8, 58.2, 61.1, 61.9, 62.0, 67.6, 67.6, 68.9, 69.6, 70.0, 70.2, 70.4, 70.6, 71.5, 72.2, 73.4, 74.3, 74.8, 75.4, 77.0, 79.4, 90.6, 92.9, 97.6, 103.1, 128.1, 128.2, 128.2, 128.2, 128.3, 128.3, 128.4, 128.5, 128.9, 128.9, 129.1, 129.2, 129.3, 129.4, 129.4, 129.6, 129.6, 129.7, 129.7, 132.9, 133.0, 133.0, 133.2, 133.3, 133.3, 133.5, 164.9, 165.0, 165.0, 165.3, 165.3, 165.5, 165.6, 165.8.

**IR** (ATR):  $\tilde{\nu}$  ( $\text{cm}^{-1}$ ) = 2926, 2864, 1722, 1674, 1601, 1451, 1316, 1261, 1091, 1066, 1024, 797, 753, 707.

**MS** (ESI):  $m/z$  (%) = 950.7 (83)  $[\text{M}+2\text{Na}]^{2+}$ , 1878.4 (100)  $[\text{M}+\text{Na}]^+$ . **HRMS** (ESI):  $m/z$  calculated for:  $\text{C}_{97}\text{H}_{92}^{35}\text{Cl}_3\text{NO}_{28}\text{S}$   $[\text{M}+\text{Na}]^+$ : 1878.4484, found: 1878.4486.



## SUPPORTING INFORMATION

**O-(2,4,3,6-Tetra-O-benzoyl- $\alpha$ -D-galactopyranosyl)-(1 $\rightarrow$ 4)-(3,6-di-O-benzoyl-2-O-(9,12,15,18,21,24,27,30,33,36,39,42,45-tridecaoxa-6-thiaoctatetracont-47-yne-1-yl)- $\beta$ -D-galactopyranosyl)-(1 $\rightarrow$ 4)-2,3,6-tri-O-benzoyl- $\beta$ -D-glucopyranosyl-(1 $\rightarrow$ 1)-(2*S*,3*R*,4*E*)-2-azido-3-O-pivaloyl-4-octadecene-1,3-diol (**23**)**

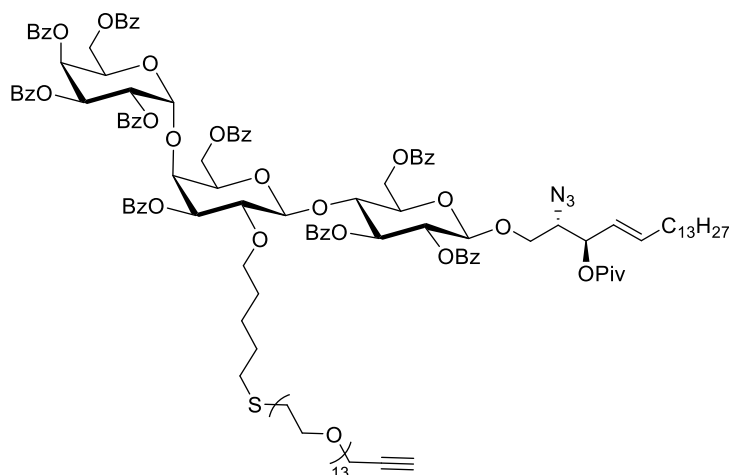

The glycosylation of trichloroacetimidate **15** (36.0 mg, 15.7  $\mu$ mol, 1.00 eq.) with azidosphingosine **10** (12.8 mg, 31.3  $\mu$ mol, 2.00 eq.) was performed according to general procedure **GP2** in anhydrous dichloromethane (1.6 mL). TMSOTf (0.1 M in  $\text{CH}_2\text{Cl}_2$ , 31.3  $\mu$ L, 3.13  $\mu$ mol, 20.0 mol%) was added and the reaction mixture was stirred for 23 h. Gel permeation HPLC afforded the target compound **23** (19.1 mg, 7.50  $\mu$ mol, 48 %) as a yellow oil.

$[\alpha]_D^{22} = +34.4$  (c 0.90,  $\text{CHCl}_3$ ).

**$^1\text{H-NMR}$**  (600 MHz,  $\text{CDCl}_3$ ):  $\delta$  (ppm) = 0.78–0.99 (m, 4 H), 0.88 (t,  $J = 7.0$  Hz, 3 H), 1.13 (s, 9 H), 1.15–1.33 (m, 28 H), 1.83–1.90 (m, 2 H), 2.10–2.20 (m, 2 H), 2.44 (t,  $J = 2.4$  Hz, 1 H), 2.56 (t,  $J = 7.2$  Hz, 2 H), 3.39–3.84 (m, 53 H), 4.00 (ddd,  $J = 10.0, 4.9, 2.2$  Hz, 1 H), 4.06–4.16 (m, 3 H), 4.16 (d,  $J = 2.9$  Hz, 1 H), 4.20 (d,  $J = 2.4$  Hz, 2 H), 4.25–4.31 ( $m_c$ , 1 H), 4.43 (dd,  $J = 11.2, 5.6$  Hz, 1 H), 4.54–4.60 (m, 2 H), 4.62–4.67 (m, 1 H), 4.75 (d,  $J = 7.7$  Hz, 1 H), 4.88–4.92 (m, 1 H), 5.05 (dd,  $J = 10.3, 2.9$  Hz, 1 H), 5.23 (dd,  $J = 7.9, 4.2$  Hz, 1 H), 5.26–5.33 (m, 1 H), 5.43 (dd,  $J = 9.5, 7.7$  Hz, 1 H), 5.47 (d,  $J = 3.5$  Hz, 1 H), 5.59 (dt,  $J = 14.3, 6.9$  Hz, 1 H), 5.64 (dd,  $J = 10.9, 3.4$  Hz, 1 H), 5.79 (t,  $J = 9.3$  Hz, 1 H), 5.83 (dd,  $J = 10.9, 3.4$  Hz, 1 H), 6.01 (d,  $J = 2.1$  Hz, 1 H), 7.18–7.25 (m, 3 H), 7.31–7.60 (m, 24 H), 7.73–7.84 (m, 6 H), 7.93–8.13 (m, 12 H).

**$^{13}\text{C-NMR}$**  (151 MHz,  $\text{CDCl}_3$ ):  $\delta$  (ppm) = 13.9, 22.5, 25.1, 26.8, 28.4, 28.8, 29.1, 29.2, 29.3, 29.4, 29.4, 29.4, 29.5, 31.0, 31.7, 31.8, 32.0, 38.6, 58.2, 60.2, 61.1, 61.5, 62.4, 63.1, 67.4, 67.7, 67.8, 68.8, 68.9, 69.7, 70.0, 70.2, 70.3, 70.4, 70.5, 71.7, 72.2, 72.5, 73.3, 73.4, 73.5, 73.6, 74.4, 74.6, 75.0, 75.9, 77.3, 79.4, 97.7, 100.4, 102.8, 122.5, 128.0, 128.1, 128.1, 128.1, 128.2, 128.3, 128.4, 128.5, 128.9, 128.9, 129.0, 129.1, 129.1, 129.2, 129.2, 129.3, 129.4, 129.4, 129.5, 129.5, 129.6, 132.9, 132.9, 133.0, 133.1, 133.2, 133.4, 138.0, 164.8, 165.0, 165.0, 165.3, 165.5, 165.6, 165.6, 165.9, 176.4.

## SUPPORTING INFORMATION

**IR** (ATR):  $\tilde{\nu}$  (cm<sup>-1</sup>) = 2924, 2858, 2102, 1724, 1602, 1452, 1315, 1263, 1092, 1067, 1027, 847, 754, 708.

**MS** (ESI):  $m/z$  (%) = 1295.1 (100) [M+2Na]<sup>2+</sup>, 2567.1 (29) [M+Na]<sup>+</sup>. **HRMS** (ESI):  $m/z$  calculated for: C<sub>138</sub>H<sub>173</sub>N<sub>3</sub>O<sub>40</sub>S [M+Na]<sup>+</sup>: 2567.1208, found: 2567.1189.

**O-(2,4,3,6-Tetra-O-benzoyl- $\alpha$ -D-galactopyranosyl)-(1 $\rightarrow$ 4)-(3,6-di-O-benzoyl-2-O-(9,12,15-trioxa-6-thiaoctadec-17-yne-1-yl)- $\beta$ -D-galactopyranosyl)-(1 $\rightarrow$ 4)-2,3,6-tri-O-benzoyl- $\beta$ -D-glucopyranosyl-(1 $\rightarrow$ 1)-(2*S*,3*R*,4*E*)-2-azido-3-O-pivaloyl-4-octadecene-1,3-diol (24)**

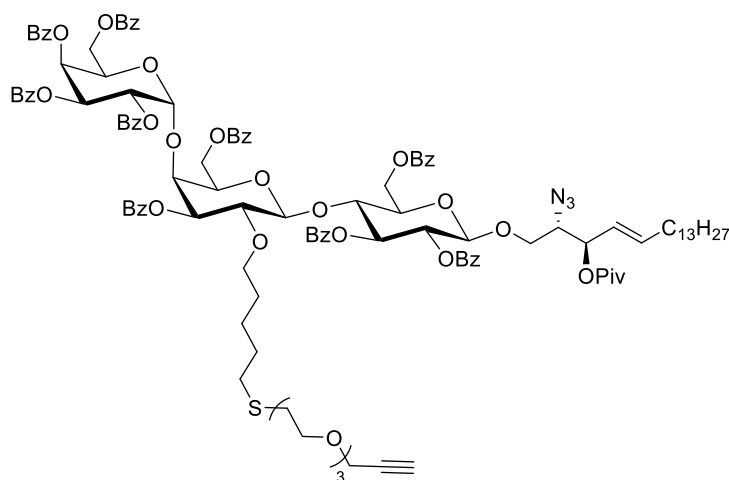

The glycosylation of trichloroacetimidate **16** (122 mg, 65.7  $\mu$ mol, 1.00 eq.) with azido-sphingosine **10** (53.7 mg, 0.131 mmol, 2.00 eq.) was performed according to general procedure **GP2** in anhydrous dichloromethane (6.6 mL) with TMSOTf (2.39  $\mu$ L, 2.91 mg, 13.1  $\mu$ mol, 20.0 mol%) in 15 h. Column chromatography on silica gel (*n*-pentane/EtOAc, 3:1  $\rightarrow$  2:1  $\rightarrow$  1:1) afforded target compound **24** (52.9 mg, 25.1  $\mu$ mol, 38 %) as a colorless oil.

$[\alpha]_D^{22} = +30.0$  (c 1.57, CHCl<sub>3</sub>).

**<sup>1</sup>H-NMR** (600 MHz, CDCl<sub>3</sub>):  $\delta$  (ppm) = 0.79–0.93 (m, 2 H), 0.88 (t,  $J = 7.0$  Hz, 3 H), 0.92–1.04 (m, 2 H), 1.13 (s, 9 H), 1.15–1.30 (m, 25 H), 1.83–1.90 (m, 2 H), 2.11–2.22 (m, 2 H), 2.41–2.45 (m, 1 H), 2.57 (t,  $J = 7.1$  Hz, 2 H), 3.40–3.47 (m, 1 H), 3.51–3.77 (m, 14 H), 3.78–3.87 (m, 1 H), 3.96–4.05 (m, 1 H), 4.05–4.18 (m, 4 H), 4.19 (d,  $J = 2.2$  Hz, 2 H), 4.25–4.32 (m<sub>c</sub>, 1 H), 4.43 (dd,  $J = 11.2, 5.6$  Hz, 1 H), 4.53–4.60 (m, 2 H), 4.62–4.68 (m<sub>c</sub>, 1 H), 4.75 (d,  $J = 8.0$  Hz, 1 H), 4.90 (dd,  $J = 11.9, 2.1$  Hz, 1 H), 5.05 (dd,  $J = 10.4, 2.9$  Hz, 1 H), 5.22 (dd,  $J = 8.0, 4.0$  Hz, 1 H), 5.26–5.33 (m, 1 H), 5.43 (dd,  $J = 9.6, 7.5$  Hz, 1 H), 5.47 (d,  $J = 3.6$  Hz, 1 H), 5.55–5.63 (m, 1 H), 5.64 (dd,  $J = 11.0, 3.5$  Hz, 1 H), 5.79 (t,  $J = 9.3$  Hz, 1 H), 5.83 (dd,  $J = 10.9, 3.3$  Hz, 1 H), 6.00–6.03 (m, 1 H), 7.15–7.25 (m, 5 H), 7.32–7.47 (m, 16 H), 7.48–7.61 (m, 6 H), 7.73–7.87 (m, 6 H), 7.93–8.13 (m, 12 H).

**<sup>13</sup>C-NMR** (151 MHz, CDCl<sub>3</sub>):  $\delta$  (ppm) = 13.9, 22.5, 25.1, 26.8, 28.4, 28.8, 29.1, 29.2, 29.3, 29.4, 29.4, 29.5, 29.5, 31.0, 31.7, 31.8, 32.0, 38.6, 58.2, 61.1, 61.6, 62.4, 63.1, 67.4, 67.7, 67.8, 68.8,

## SUPPORTING INFORMATION

68.9, 69.7, 70.0, 70.2, 70.4, 70.6, 71.7, 72.2, 72.6, 73.3, 73.5, 73.6, 74.3, 74.6, 75.1, 75.9, 77.3, 79.4, 97.7, 100.4, 102.8, 122.5, 128.0, 128.1, 128.1, 128.2, 128.2, 128.3, 128.4, 128.5, 128.9, 129.0, 129.0, 129.1, 129.2, 129.2, 129.3, 129.3, 129.4, 129.4, 129.5, 129.6, 132.9, 132.9, 133.0, 133.1, 133.2, 133.5, 138.0, 164.8, 165.0, 165.0, 165.3, 165.5, 165.6, 165.6, 165.9, 176.5.

**IR** (ATR):  $\tilde{\nu}$  (cm<sup>-1</sup>) = 2925, 2855, 2102, 1723, 1602, 1452, 1316, 1263, 1091, 1066, 1027, 972, 851, 829, 707.

**MS** (ESI):  $m/z$  (%) = 1074.9 (58) [M+2Na]<sup>2+</sup>, 2126.9 (100) [M+Na]<sup>+</sup>. **HRMS** (ESI):  $m/z$  calculated for: C<sub>118</sub>H<sub>133</sub>N<sub>3</sub>O<sub>30</sub>S [M+Na]<sup>+</sup>:2126.8587, found:2126.8592.

**O-(2,4,3,6-Tetra-O-benzoyl- $\alpha$ -D-galactopyranosyl)-(1 $\rightarrow$ 4)-(3,6-di-O-benzoyl-2-O-(9,12,15,18,21,24,27,30,33,36,39,42,45-tridecaoxa-6-thiaoctatetracont-47-yne-1-yl)- $\beta$ -D-galactopyranosyl)-(1 $\rightarrow$ 4)-2,3,6-tri-O-benzoyl- $\beta$ -D-glucopyranosyl-(1 $\rightarrow$ 1)-(2S,3R,4E)-3-O-pivaloyl-2-(tetracosanamido)-4-octadecene-1,3-diol (40)**

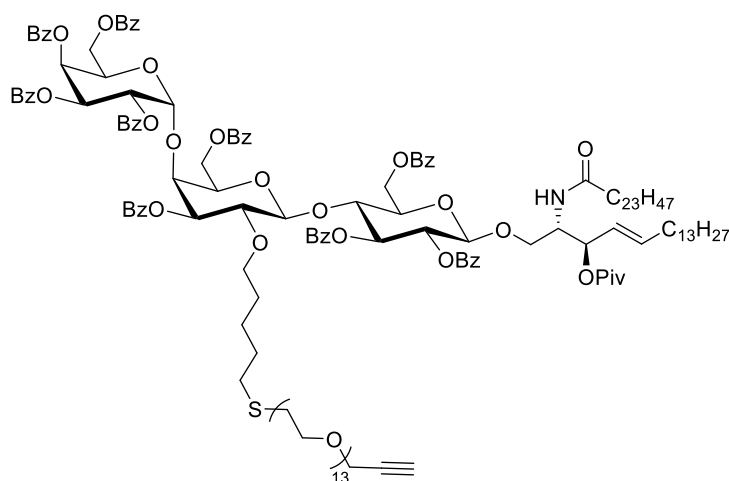

The reduction of azide **23** (19.1 mg, 7.50  $\mu$ mol, 1.00 eq.) was performed according to general procedure **GP3** with triphenylphosphine (4.93 mg, 18.8  $\mu$ mol, 2.50 eq.) in benzene (1.5 mL) and water (6.0  $\mu$ L). The resulting amine was dissolved in THF (0.5 mL) and was reacted with lignoceric acid (**11**) (3.59 mg, 9.75  $\mu$ mol, 1.30 eq.), DIPEA (1.70  $\mu$ L, 1.26 mg, 9.75  $\mu$ mol, 1.30 eq.) and a solution of HATU (3.71 mg, 9.75  $\mu$ mol, 1.30 eq.) in DMF (0.25 mL). The reaction mixture was stirred for 2 h. Gel permeation HPLC afforded glycolipid **40** (13.5 mg, 4.70  $\mu$ mol, 63 %) as a colorless oil.

$[\alpha]_D^{26} = +38.8$  (c 0.60, CHCl<sub>3</sub>).

**<sup>1</sup>H-NMR** (600 MHz, CDCl<sub>3</sub>):  $\delta$  (ppm) = 0.75–0.92 (m, 10 H), 1.06 (s, 9 H), 1.13–1.44 (m, 55 H), 1.59–1.71 (m, 2 H), 1.88–1.98 (m, 2 H), 2.05–2.21 (m, 2 H), 2.44 (t,  $J = 2.4$  Hz, 1 H), 2.56 (t,  $J = 7.1$  Hz, 2 H), 3.38–3.45 (m, 1 H), 3.47 (dd,  $J = 9.7, 3.7$  Hz, 1 H), 3.50–3.57 (m, 4 H), 3.57–3.74 (m, 61 H), 3.76 (t,  $J = 5.9$  Hz, 1 H), 3.97 (ddd,  $J = 9.6, 4.6, 2.0$  Hz, 1 H), 4.06 (dd,  $J = 8.5, 6.1$  Hz, 1 H), 4.08–4.19 (m, 3 H), 4.21 (d,  $J = 2.2$  Hz, 2 H), 4.25 (t,  $J = 9.5$  Hz, 1 H), 4.47 (dd,

## SUPPORTING INFORMATION

$J = 11.2, 5.7$  Hz, 1 H), 4.52–4.58 (m, 2 H), 4.58–4.64 (m, 1 H), 4.67 (d,  $J = 7.9$  Hz, 1 H), 4.85–4.88 (m, 1 H), 5.05 (dd,  $J = 10.3, 2.9$  Hz, 1 H), 5.16 (t,  $J = 7.4$  Hz, 1 H), 5.26–5.33 (m, 1 H), 5.37 (dd,  $J = 9.7, 7.8$  Hz, 1 H), 5.46–5.51 (m, 2 H), 5.62 (dd,  $J = 10.8, 3.6$  Hz, 1 H), 5.65–5.73 (m, 1 H), 5.77–5.83 (m, 2 H), 5.98 (dd,  $J = 3.4, 1.5$  Hz, 1 H), 7.11–7.26 (m, 6 H), 7.31–7.62 (m, 21 H), 7.72–7.87 (m, 6 H), 7.90–8.15 (m, 12 H).

$^{13}\text{C-NMR}$  (151 MHz,  $\text{CDCl}_3$ ):  $\delta$  (ppm) = 14.1, 15.1, 22.7, 25.3, 25.5, 26.9, 29.0, 29.2, 29.3, 29.4, 29.4, 29.5, 29.5, 29.6, 29.6, 29.7, 29.7, 29.7, 29.7, 29.7, 31.2, 31.9, 32.0, 32.2, 36.4, 38.6, 42.8, 50.2, 58.4, 61.4, 61.8, 62.6, 66.6, 67.6, 67.8, 69.0, 69.1, 69.7, 70.0, 70.2, 70.2, 70.3, 70.3, 70.5, 70.7, 71.3, 72.4, 72.5, 73.0, 73.5, 73.7, 74.6, 74.8, 75.3, 76.0, 77.6, 79.6, 97.8, 101.1, 103.0, 125.0, 128.3, 128.4, 128.4, 128.5, 128.5, 128.6, 128.7, 129.1, 129.1, 129.2, 129.2, 129.3, 129.4, 129.5, 129.5, 129.6, 129.6, 129.7, 129.8, 129.9, 129.9, 133.1, 133.2, 133.4, 133.7, 136.8, 165.1, 165.2, 165.2, 165.6, 165.7, 165.8, 165.8, 166.1, 172.5, 176.8.

**IR** (ATR):  $\tilde{\nu}$  ( $\text{cm}^{-1}$ ) = 2923, 2854, 1725, 1679, 1602, 1453, 1263, 1095, 1068, 1029, 845, 804, 711.

**MS** (ESI):  $m/z$  (%) = 1457.2 (13)  $[\text{M}+2\text{Na}]^{2+}$ , 2891.5 (100)  $[\text{M}+\text{Na}]^+$ . **HRMS** (ESI):  $m/z$  calculated for:  $\text{C}_{162}\text{H}_{221}\text{NO}_{41}\text{S}$   $[\text{M}+\text{Na}]^+$ : 2891.4852, found: 2891.4839.

**O-(2,4,3,6-Tetra-O-benzoyl- $\alpha$ -D-galactopyranosyl)-(1 $\rightarrow$ 4)-(3,6-di-O-benzoyl-2-O-(9,12,15-trioxa-6-thiaoctadec-17-yne-1-yl)- $\beta$ -D-galactopyranosyl)-(1 $\rightarrow$ 4)-2,3,6-tri-O-benzoyl- $\beta$ -D-glucopyranosyl-(1 $\rightarrow$ 1)-(2S,3R,4E)-3-O-pivaloyl-2-(tetracosanamido)-4-octadecene-1,3-diol (41)**

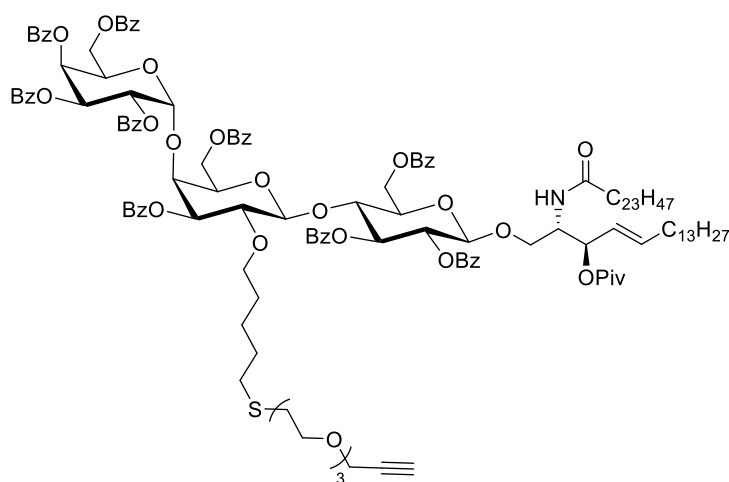

The reduction of azide **24** (30.0 mg, 14.2  $\mu\text{mol}$ , 1.00 eq.) was performed according to general procedure **GP3** with triphenylphosphine (9.34 mg, 35.6  $\mu\text{mol}$ , 2.50 eq.) in benzene (2.8 mL) and water (3 drops). The resulting amine was dissolved in THF (1.4 mL) and was reacted with lignoceric acid (**11**) (6.82 mg, 18.5  $\mu\text{mol}$ , 1.30 eq.), DIPEA (3.22  $\mu\text{L}$ , 2.39 mg, 18.5  $\mu\text{mol}$ , 1.30 eq.) and a solution of HATU (7.03 mg, 18.5  $\mu\text{mol}$ , 1.30 eq.) in DMF (0.70 mL). The reaction

## SUPPORTING INFORMATION

mixture was stirred for 20 h. Gel permeation HPLC afforded glycolipid **41** (13.6 mg, 5.60  $\mu\text{mol}$ , 39 %) as a colorless oil.

$[\alpha]_{\text{D}}^{20} = +34.8$  (*c* 1.36,  $\text{CHCl}_3$ ).

**$^1\text{H-NMR}$**  (600 MHz,  $\text{CDCl}_3$ ):  $\delta$  (ppm) = 0.74–0.95 (m, 8 H), 0.93–1.01 (m, 2 H), 1.06 (s, 9 H), 1.11–1.38 (m, 65 H), 1.61–1.70 (m, 2 H), 1.90–1.97 (m, 2 H), 2.10–2.21 (m, 2 H), 2.43 (t,  $J = 2.3$  Hz, 1 H), 2.57 (t,  $J = 7.1$  Hz, 2 H), 3.34–3.46 (m, 1 H), 3.50–3.73 (m, 14 H), 3.94–4.00 (m, 1 H), 4.02–4.18 (m, 6 H), 4.19 (d,  $J = 2.3$  Hz, 2 H), 4.22–4.30 (m, 2 H), 4.43–4.49 (mc, 1 H), 4.51–4.59 (m, 2 H), 4.59–4.64 (m, 1 H), 4.67 (d,  $J = 7.8$  Hz, 1 H), 4.87 (dd,  $J = 12.1, 2.1$  Hz, 1 H), 5.05 (dd,  $J = 10.4, 2.8$  Hz, 1 H), 5.14–5.20 (mc, 1 H), 5.29 (ddd,  $J = 15.4$  Hz, 7.3, 1.3 Hz, 1 H), 5.37 (dd,  $J = 9.8, 7.8$  Hz, 1 H), 5.45–5.51 (m, 2 H), 5.62 (dd,  $J = 10.8, 3.4$  Hz, 1 H), 5.65–5.74 (m, 1 H), 5.75–5.84 (m, 2 H), 5.98–6.00 (m, 1 H), 7.16–7.26 (m, 4 H), 7.32–7.47 (m, 17 H), 7.48–7.62 (m, 6 H), 7.73–7.83 (m, 6 H), 7.92–8.13 (m, 12 H).

**$^{13}\text{C-NMR}$**  (151 MHz,  $\text{CDCl}_3$ ):  $\delta$  (ppm) = 14.1, 22.7, 25.3, 25.5, 26.9, 29.0, 29.2, 29.4, 29.4, 29.5, 29.5, 29.6, 29.7, 29.7, 29.7, 29.7, 31.2, 31.9, 32.1, 32.2, 36.4, 38.7, 50.2, 58.4, 61.4, 61.8, 62.6, 67.6, 67.9, 69.1, 69.1, 70.0, 70.2, 70.4, 70.6, 70.8, 72.4, 72.5, 72.5, 73.0, 73.5, 73.7, 74.6, 74.8, 75.3, 76.0, 77.6, 79.6, 97.9, 101.1, 103.0, 125.0, 128.3, 128.4, 128.4, 128.5, 128.5, 128.6, 128.7, 129.1, 129.2, 129.3, 129.4, 129.5, 129.5, 129.6, 129.6, 129.8, 129.8, 129.9, 129.9, 133.1, 133.1, 133.2, 133.3, 133.4, 133.5, 133.7, 136.8, 165.1, 165.2, 165.2, 165.6, 165.7, 165.8, 165.8, 166.1, 172.4, 176.8.

**IR** (ATR):  $\tilde{\nu}$  ( $\text{cm}^{-1}$ ) = 2923, 2853, 1723, 1681, 1601, 1451, 1264, 1091, 1066, 1026, 844, 801, 754, 707.

**MS** (ESI):  $m/z$  (%) = 1237.1 (100)  $[\text{M}+2\text{Na}]^{2+}$ , 2451.2 (55)  $[\text{M}+\text{Na}]^+$ . **HRMS** (ESI):  $m/z$  calculated for:  $\text{C}_{142}\text{H}_{181}\text{NO}_{31}\text{S}$   $[\text{M}+\text{Na}]^+$ : 2451.2242, found: 2451.2206.

## SUPPORTING INFORMATION

**O-(2,4,3,6-Tetra-O-benzoyl- $\alpha$ -D-galactopyranosyl-(1 $\rightarrow$ 4)-(3,6-di-O-benzoyl-2-O-(9,12,15,18,21,24,27,30,33,36,39,42,45-tridecaoxa-6-thiaoctatetracont-47-yne-1-yl)- $\beta$ -D-galactopyranosyl)-(1 $\rightarrow$ 4)-2,3,6-tri-O-benzoyl- $\beta$ -D-glucopyranosyl-(1 $\rightarrow$ 1)-(2*S*,3*R*,4*E*,2'*R*)-2-(2'-benzoyloxytetracosanamido)-3-O-pivaloyl-4-octadecene-1,3-diol (42)**

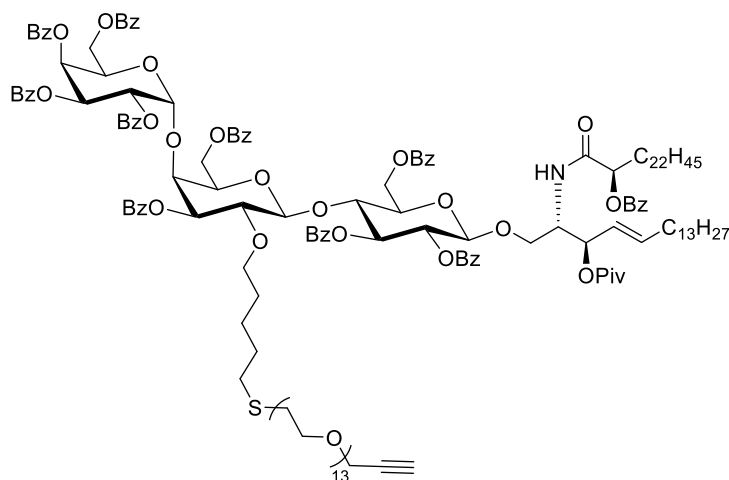

The reduction of azide **23** (23.0 mg, 9.03  $\mu$ mol, 1.00 eq.) was performed according to general procedure **GP3** using triphenylphosphine (5.93 mg, 22.6  $\mu$ mol, 2.50 eq.) in benzene (1.8 mL) and water (3 drops). The amine was dissolved in THF (0.90 mL) and hydroxylated acid **12**<sup>[4]</sup> (5.72 mg, 11.7  $\mu$ mol, 1.30 eq.), DIPEA (2.04  $\mu$ L, 1.51 mg, 11.7  $\mu$ mol, 1.30 eq.) and a solution of HATU (4.45 mg, 11.7  $\mu$ mol, 1.30 eq.) in DMF (0.45 mL) were added. The reaction mixture was stirred for 16 h. Column chromatography on silica gel (CH<sub>2</sub>Cl<sub>2</sub>/MeOH, 40:1  $\rightarrow$  15:1), followed by gel permeation HPLC afforded glycolipid **42** (10.3 mg, 3.44  $\mu$ mol, 38 %) as a colorless oil.

$[\alpha]_D^{20} = +38.9$  (c 0.60, CHCl<sub>3</sub>).

**<sup>1</sup>H-NMR** (500 MHz, CDCl<sub>3</sub>):  $\delta$  (ppm) = 0.77–0.94 (m, 10 H), 0.89–0.99 (m, 2 H), 1.04 (s, 9 H), 1.10–1.40 (m, 71 H), 1.69–1.88 (m, 3 H), 2.07–2.20 (m, 2 H), 2.44 (t,  $J = 2.4$  Hz, 1 H), 2.52–2.59 (m<sub>c</sub>, 2 H), 3.35–3.74 (m, 47 H), 3.86–3.93 (m, 1 H), 3.94 (dd,  $J = 10.2, 4.3$  Hz, 1 H), 4.02–4.19 (m, 5 H), 4.20 (d,  $J = 2.4$  Hz, 2 H), 4.27–4.35 (m, 1 H), 4.44 (dd,  $J = 11.1, 5.6$  Hz, 1 H), 4.50 (dd,  $J = 12.1, 4.7$  Hz, 1 H), 4.54 (d,  $J = 7.5$  Hz, 1 H), 4.59–4.66 (m, 1 H), 4.68 (d,  $J = 7.7$  Hz, 1 H), 4.78–4.84 (m, 1 H), 5.04 (dd,  $J = 10.2, 2.9$  Hz, 1 H), 5.12–5.19 (m, 1 H), 5.23–5.35 (m, 3 H), 5.47 (d,  $J = 3.6$  Hz, 1 H), 5.58 (dd,  $J = 14.2, 6.9$  Hz, 1 H), 5.63 (dd,  $J = 10.9, 3.4$  Hz, 1 H), 5.69–5.76 (m<sub>c</sub>, 1 H), 5.81 (dd,  $J = 10.8, 3.4$  Hz, 1 H), 5.96–6.02 (m, 1 H), 6.37 (d,  $J = 8.8$  Hz, 1 H), 7.17–7.25 (m, 4 H), 7.28–7.62 (m, 26 H), 7.71–7.90 (m, 8 H), 7.93–8.14 (m, 12 H).

**<sup>13</sup>C-NMR** (151 MHz, CDCl<sub>3</sub>):  $\delta$  (ppm) = 14.1, 22.7, 24.7, 25.3, 26.9, 26.9, 28.8, 29.2, 29.4, 29.4, 29.4, 29.5, 29.5, 29.6, 29.7, 29.7, 29.7, 31.2, 31.5, 31.9, 32.0, 32.2, 38.7, 50.8, 58.4, 61.2, 61.8, 62.6, 67.1, 67.6, 67.9, 69.0, 69.1, 69.9, 70.2, 70.4, 70.5, 70.8, 72.0, 72.4, 72.8, 73.0, 73.5, 73.7, 74.5, 74.6, 74.8, 75.2, 76.1, 77.5, 79.7, 97.9, 100.6, 103.1, 124.3, 128.3, 128.3, 128.4, 128.4, 128.5, 128.6, 128.6, 128.7, 129.1, 129.2, 129.2, 129.2, 129.3, 129.4, 129.4, 129.5, 129.6, 129.6, 129.7, 129.7, 129.8, 129.9, 133.1, 133.1, 133.3, 133.4, 133.5, 133.5, 133.7, 136.6, 165.0, 165.1, 165.2, 165.5, 165.7, 165.8, 166.1, 169.3, 176.9.

## SUPPORTING INFORMATION

**IR** (ATR):  $\tilde{\nu}$  (cm<sup>-1</sup>) = 2923, 2855, 1725, 1602, 1516, 1453, 1352, 1315, 1263, 1095, 1068, 1028, 846, 803, 710.

**MS** (ESI):  $m/z$  (%) = 1019.2 (33) [M+3Na]<sup>3+</sup>, 1517.2 (100) [M+2Na]<sup>2+</sup>, 3011.5 (8) [M+Na]<sup>+</sup>.

**HRMS** (ESI):  $m/z$  calculated for: C<sub>169</sub>H<sub>225</sub>NO<sub>43</sub>S [M+Na]<sup>+</sup>: 3011.5063, found: 3011.5004.

**O-(2,4,3,6-Tetra-O-benzoyl- $\alpha$ -D-galactopyranosyl)-(1 $\rightarrow$ 4)-(3,6-di-O-benzoyl-2-O-(9,12,15-trioxa-6-thiaoctadec-17-yne-1-yl)- $\beta$ -D-galactopyranosyl)-(1 $\rightarrow$ 4)-2,3,6-tri-O-benzoyl- $\beta$ -D-glucopyranosyl-(1 $\rightarrow$ 1)-(2*S*,3*R*,4*E*,2'*R*)-2-(2'-benzoyloxytetracosanamido)-3-O-pivaloyl-4-octadecene-1,3-diol (43)**

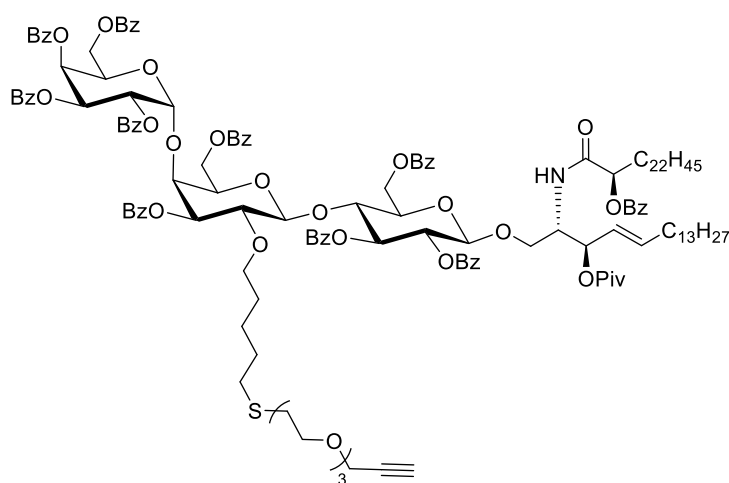

The reduction of azide **24** (20.0 mg, 9.50  $\mu$ mol, 1.00 eq.) was performed according to general procedure **GP3** with triphenylphosphine (6.24 mg, 23.8  $\mu$ mol, 2.50 eq.) in benzene (1.9 mL) and water (3 drops). The resulting amine was dissolved in THF (0.95 mL) and was reacted with fatty acid **12**<sup>[4]</sup> (6.06 mg, 12.4  $\mu$ mol, 1.30 eq.), DIPEA (2.16  $\mu$ L, 1.60 mg, 12.4  $\mu$ mol, 1.30 eq.) and a solution of HATU (4.71 mg, 12.4  $\mu$ mol, 1.30 eq.) in DMF (0.50 mL). The reaction mixture was stirred for 16 h at ambient temperature. Column chromatography on silica gel (*n*-pentane/EtOAc, 3:1  $\rightarrow$  2:1) afforded glycolipid **43** (17.0 mg, 6.67  $\mu$ mol, 70 %) as a colorless oil.

$[\alpha]_D^{23} = +31.5$  (c 1.67, CHCl<sub>3</sub>).

**<sup>1</sup>H-NMR** (600 MHz, CDCl<sub>3</sub>):  $\delta$  (ppm) = 0.72–1.00 (m, 9 H), 1.05 (s, 9 H), 1.09–1.32 (m, 64 H), 1.74–1.87 (m, 4 H), 2.06–2.21 (m, 2 H), 2.41–2.45 (m<sub>c</sub>, 1 H), 2.56 (t,  $J = 7.1$  Hz, 2 H), 3.38–3.47 (m, 1 H), 3.49–3.74 (m, 14 H), 3.90 (ddd,  $J = 9.9, 4.7, 2.1$  Hz, 1 H), 3.94 (dd,  $J = 10.4, 4.4$  Hz, 1 H), 4.00–4.19 (m, 5 H), 4.19 (d,  $J = 2.4$  Hz, 2 H), 4.26–4.36 (m, 2 H), 4.43 (dd,  $J = 11.1, 5.6$  Hz, 1 H), 4.50 (dd,  $J = 12.0, 4.7$  Hz, 1 H), 4.54 (d,  $J = 7.5$  Hz, 1 H), 4.61–4.66 (m<sub>c</sub>, 1 H), 4.69 (d,  $J = 7.7$  Hz, 1 H), 4.77–4.84 (m, 1 H), 5.05 (dd,  $J = 10.3, 2.8$  Hz, 1 H), 5.16 (t,  $J = 6.0$  Hz, 1 H), 5.24–5.34 (m, 3 H), 5.47 (d,  $J = 3.6$  Hz, 1 H), 5.53–5.62 (m, 1 H), 5.63 (dd,  $J = 10.8, 3.5$  Hz, 1 H), 5.73 (t,  $J = 9.4$  Hz, 1 H), 5.82 (dd,  $J = 10.9, 3.4$  Hz, 1 H), 5.99–6.01 (m, 1 H), 6.37 (d,  $J = 8.7$  Hz, 1 H), 7.15–7.25 (m, 4 H), 7.29–7.63 (m, 26 H), 7.72–7.82 (m, 6 H), 7.84–8.15 (m, 14 H).

## SUPPORTING INFORMATION

**$^{13}\text{C-NMR}$**  (151 MHz,  $\text{CDCl}_3$ ):  $\delta$  (ppm) = 14.1, 22.7, 24.7, 25.3, 26.9, 28.8, 29.2, 29.4, 29.4, 29.4, 29.5, 29.5, 29.6, 29.7, 29.7, 29.7, 29.7, 31.2, 31.5, 31.9, 32.0, 32.2, 38.7, 50.8, 58.4, 61.2, 61.8, 62.6, 67.1, 67.6, 67.9, 69.0, 69.1, 69.9, 70.2, 70.4, 70.6, 70.8, 72.0, 72.4, 72.8, 73.0, 73.5, 73.7, 74.6, 74.6, 74.8, 75.2, 76.1, 77.5, 79.6, 97.9, 100.6, 103.1, 124.3, 128.3, 128.3, 128.4, 128.4, 128.5, 128.6, 128.6, 128.7, 129.1, 129.2, 129.2, 129.2, 129.3, 129.4, 129.4, 129.5, 129.6, 129.7, 129.7, 129.8, 129.9, 133.1, 133.1, 133.1, 133.2, 133.4, 133.5, 133.5, 133.7, 136.6, 165.0, 165.1, 165.2, 165.5, 165.7, 165.8, 166.1, 169.3, 176.9.

**IR** (ATR):  $\tilde{\nu}$  ( $\text{cm}^{-1}$ ) = 2924, 2853, 1724, 1602, 1452, 1316, 1264, 1093, 1067, 1027, 754, 707.

**MS** (ESI):  $m/z$  (%) = 1297.1 (95)  $[\text{M}+2\text{Na}]^{2+}$ , 2571.2 (100)  $[\text{M}+\text{Na}]^+$ . **HRMS** (ESI):  $m/z$  calculated for:  $\text{C}_{149}\text{H}_{185}\text{NO}_{33}\text{S}$   $[\text{M}+\text{Na}]^+$ : 2571.2442, found: 2571.2446.

**O-(2,4,3,6-Tetra-O-benzoyl- $\alpha$ -D-galactopyranosyl)-(1 $\rightarrow$ 4)-(3,6-di-O-benzoyl-2-O-(9,12,15,18,21,24,27,30,33,36,39,42,45-tridecaoxa-6-thiaoctatetracont-47-yne-1-yl)- $\beta$ -D-galactopyranosyl)-(1 $\rightarrow$ 4)-2,3,6-tri-O-benzoyl- $\beta$ -D-glucopyranosyl-(1 $\rightarrow$ 1)-(2S,3R,4E,15'Z)-3-O-pivaloyl-2-(15'-tetracosenamido)-4-octadecen-1,3-diol (44)**

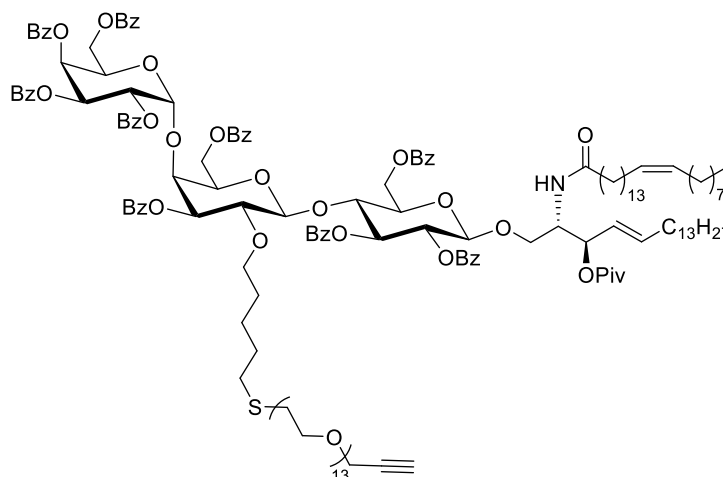

The reduction of azide **23** (25.6 mg, 10.1  $\mu\text{mol}$ , 1.00 eq.) was performed according to general procedure **GP3** with triphenylphosphine (6.58 mg, 25.1  $\mu\text{mol}$ , 2.50 eq.) in benzene (2.0 mL) and water (7.0  $\mu\text{L}$ ). The amine was dissolved in THF (0.50 mL) and nervonic acid (**13**) (4.80 mg, 13.1  $\mu\text{mol}$ , 1.30 eq.), DIPEA (2.28  $\mu\text{L}$ , 1.69 mg, 13.1  $\mu\text{mol}$ , 1.30 eq.) and a solution of HATU (4.98 mg, 13.1  $\mu\text{mol}$ , 1.30 eq.) in DMF (0.30 mL) were added and the reaction mixture was stirred for 3 h. Gel permeation HPLC afforded glycolipid **44** (11.5 mg, 4.01  $\mu\text{mol}$ , 40 %) as a colorless oil.

$[\alpha]_{\text{D}}^{27} = +25.0$  (c 1.00,  $\text{CHCl}_3$ ).

**$^1\text{H-NMR}$**  (600 MHz,  $\text{CDCl}_3$ ):  $\delta$  (ppm) = 0.77–0.92 (m, 9 H), 1.06 (s, 9 H), 1.13–1.34 (m, 63 H), 1.89–1.98 (m, 2 H), 1.97–2.05 (m, 4 H), 2.08–2.20 (m, 2 H), 2.42–2.47 (m, 1 H), 2.51–2.62 (m, 2 H), 3.39–3.85 (m, 55 H), 4.02–4.19 (m, 5 H), 4.19–4.22 (m, 2 H), 4.23–4.32 (m, 2 H), 4.47 (dd,



## SUPPORTING INFORMATION

$J = 11.1, 5.6$  Hz, 1 H), 4.51–4.59 (m, 2 H), 4.61 (t,  $J = 6.6$  Hz, 1 H), 4.64–4.71 (m, 1 H), 4.83–4.90 (m<sub>c</sub>, 1 H), 5.05 (dd,  $J = 10.2, 2.8$  Hz, 1 H), 5.13–5.20 (m<sub>c</sub>, 1 H), 5.29 (dd,  $J = 15.5, 7.4$  Hz, 1 H), 5.32–5.41 (m, 3 H), 5.43–5.52 (m, 2 H), 5.62 (dd,  $J = 10.8, 3.5$  Hz, 1 H), 5.65–5.74 (m<sub>c</sub>, 1 H), 5.80 (dd,  $J = 10.8, 3.3$  Hz, 1 H), 5.98 (dd,  $J = 3.5, 1.4$  Hz, 1 H), 7.12–7.26 (m, 3 H), 7.32–7.61 (m, 24 H), 7.73–7.86 (m, 6 H), 7.93–8.14 (m, 12 H).

**$^{13}\text{C-NMR}$**  (151 MHz,  $\text{CDCl}_3$ ):  $\delta$  (ppm) = 14.1, 22.7, 25.3, 25.5, 26.9, 27.2, 27.2, 29.0, 29.2, 29.3, 29.4, 29.4, 29.5, 29.6, 29.6, 29.7, 29.7, 29.8, 29.8, 31.2, 31.9, 31.9, 32.1, 32.2, 36.4, 38.6, 50.2, 58.5, 61.4, 61.8, 62.6, 67.6, 67.9, 69.1, 70.0, 70.2, 70.3, 70.4, 70.4, 70.5, 70.8, 72.4, 72.5, 73.0, 73.7, 74.8, 75.3, 76.0, 77.3, 79.6, 97.8, 101.1, 103.0, 125.0, 128.2, 128.3, 128.4, 128.4, 128.5, 128.5, 128.6, 128.7, 129.1, 129.2, 129.2, 129.3, 129.4, 129.5, 129.5, 129.6, 129.6, 129.8, 129.8, 129.9, 133.1, 133.2, 133.3, 133.4, 133.5, 133.7, 136.8, 165.1, 165.2, 165.2, 165.6, 165.7, 165.8, 165.8, 166.1, 172.4, 176.8.

**IR** (ATR):  $\tilde{\nu}$  ( $\text{cm}^{-1}$ ) = 2923, 2855, 1725, 1677, 1452, 1265, 1093, 1067, 1028, 843, 754, 709.

**MS** (ESI):  $m/z$  (%) = 1456.2 (100)  $[\text{M}+2\text{Na}]^{2+}$ , 2889.5 (31)  $[\text{M}+\text{Na}]^+$ . **HRMS** (ESI):  $m/z$  calculated for:  $\text{C}_{162}\text{H}_{219}\text{NO}_{41}\text{S}$   $[\text{M}+\text{Na}]^+$ : 2889.4695, found: 2889.4629.

**O-(2,4,3,6-Tetra-O-benzoyl- $\alpha$ -D-galactopyranosyl)-(1 $\rightarrow$ 4)-(3,6-di-O-benzoyl-2-O-(9,12,15-trioxa-6-thiaoctadec-17-yne-1-yl)- $\beta$ -D-galactopyranosyl)-(1 $\rightarrow$ 4)-2,3,6-tri-O-benzoyl- $\beta$ -D-glucopyranosyl-(1 $\rightarrow$ 1)-(2S,3R,4E,15'Z)-3-O-pivaloyl-2-(15'-tetracosenamido)-4-octadecene-1,3-diol (45)**

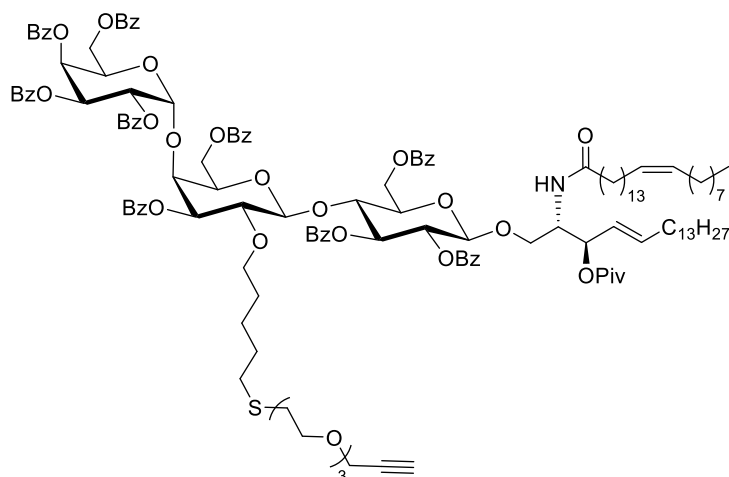

The reduction of azide **24** (16.0 mg, 7.60  $\mu\text{mol}$ , 1.00 eq.) was performed according to general procedure **GP3** with triphenylphosphine (4.98 mg, 19.0  $\mu\text{mol}$ , 2.50 eq.) in benzene (1.5 mL) and water (3 drops). The resulting amine was dissolved in THF (0.80 mL) and was reacted with nervonic acid (**13**) (3.62 mg, 9.88  $\mu\text{mol}$ , 1.30 eq.), DIPEA (1.72  $\mu\text{L}$ , 1.28 mg, 9.88  $\mu\text{mol}$ , 1.30 eq.) and a solution of HATU (3.76 mg, 9.88  $\mu\text{mol}$ , 1.30 eq.) in DMF (0.40 mL). The reaction mixture was stirred for 17 h at ambient temperature. Column chromatography on silica gel

## SUPPORTING INFORMATION

(*n*-pentane/EtOAc, 3:1 → 2:1) afforded glycolipid **45** (11.2 mg, 4.61 μmol, 61 %) as a colorless oil.

$[\alpha]_D^{22} = +33.4$  (*c* 0.58, CHCl<sub>3</sub>).

**<sup>1</sup>H-NMR** (600 MHz, CDCl<sub>3</sub>): δ (ppm) = 0.77–0.91 (m, 8 H), 0.91–1.01 (m, 2 H), 1.06 (s, 9 H), 1.10–1.41 (m, 56 H), 1.47–1.72 (m, 4 H), 1.88–1.97 (m<sub>c</sub>, 2 H), 1.97–2.06 (m, 4 H), 2.09–2.20 (m, 2 H), 2.43 (t, *J* = 2.4 Hz, 1 H), 2.57 (t, *J* = 7.1 Hz, 2 H), 3.36–3.46 (m, 1 H), 3.51–3.74 (m, 14 H), 3.93–4.00 (m, 1 H), 4.03–4.18 (m, 5 H), 4.20 (d, *J* = 2.4 Hz, 2 H), 4.22–4.31 (m, 2 H), 4.46 (dd, *J* = 11.2, 5.6 Hz, 1 H), 4.49–4.58 (m, 2 H), 4.61 (t, *J* = 6.5 Hz, 1 H), 4.67 (d, *J* = 7.8 Hz, 1 H), 4.84–4.89 (m, 1 H), 5.05 (dd, *J* = 10.3, 2.9 Hz, 1 H), 5.17 (t, *J* = 7.5 Hz, 1 H), 5.29 (dd, *J* = 15.6, 7.4 Hz, 1 H), 5.32–5.41 (m, 3 H), 5.45–5.52 (m, 2 H), 5.62 (dd, *J* = 10.8, 3.5 Hz, 1 H), 5.65–5.74 (m<sub>c</sub>, 1 H), 5.78–5.84 (m, 2 H), 5.97–6.02 (m, 1 H), 7.13–7.25 (m, 4 H), 7.32–7.48 (m, 16 H), 7.48–7.64 (m, 7 H), 7.73–7.84 (m, 6 H), 7.92–8.14 (m, 12 H).

**<sup>13</sup>C-NMR** (151 MHz, CDCl<sub>3</sub>): δ (ppm) = 14.1, 22.7, 22.7, 25.3, 25.5, 26.9, 27.2, 27.2, 29.0, 29.2, 29.3, 29.4, 29.4, 29.4, 29.5, 29.5, 29.5, 29.6, 29.6, 29.7, 29.7, 29.7, 29.8, 29.8, 31.2, 31.9, 31.9, 32.1, 32.2, 36.4, 38.7, 50.2, 58.4, 61.4, 61.8, 62.6, 67.6, 67.8, 67.9, 69.1, 69.1, 70.0, 70.2, 70.4, 70.6, 70.8, 72.4, 72.5, 72.5, 73.0, 73.5, 73.7, 74.6, 74.8, 75.3, 76.0, 77.6, 79.6, 97.9, 101.1, 103.0, 125.0, 128.3, 128.4, 128.4, 128.5, 128.5, 128.6, 128.7, 129.1, 129.2, 129.2, 129.3, 129.4, 129.5, 129.5, 129.6, 129.6, 129.7, 129.8, 129.8, 129.9, 129.9, 133.1, 133.1, 133.2, 133.3, 133.5, 133.7, 136.8, 165.1, 165.2, 165.2, 165.6, 165.7, 165.8, 165.8, 166.1, 172.5, 176.8.

**IR** (ATR):  $\tilde{\nu}$  (cm<sup>-1</sup>) = 2924, 2853, 1724, 1679, 1602, 1452, 1316, 1264, 1093, 1067, 1027, 851, 802, 708.

**MS** (ESI): *m/z* (%) = 1236.1 (100) [M+2Na]<sup>2+</sup>, 2449.2 (59) [M+Na]<sup>+</sup>. **HRMS** (ESI): *m/z* calculated for: C<sub>142</sub>H<sub>179</sub>NO<sub>31</sub>S [M+Na]<sup>+</sup>: 2449.2074, found: 2449.2067.

## SUPPORTING INFORMATION

**O-(2,4,3,6-Tetra-O-benzoyl- $\alpha$ -D-galactopyranosyl)-(1 $\rightarrow$ 4)-(3,6-di-O-benzoyl-2-O-(9,12,15,18,21,24,27,30,33,36,39,42,45-tridecaoxa-6-thiaoctatetracont-47-yne-1-yl)- $\beta$ -D-galactopyranosyl)-(1 $\rightarrow$ 4)-2,3,6-tri-O-benzoyl- $\beta$ -D-glucopyranosyl-(1 $\rightarrow$ 1)-(2S,3R,4E,2'R,15'E)-2-(2'-hydroxy-15'-tetracosenamido)-3-O-pivaloyl-4-octadecene-1,3-diol (46)**

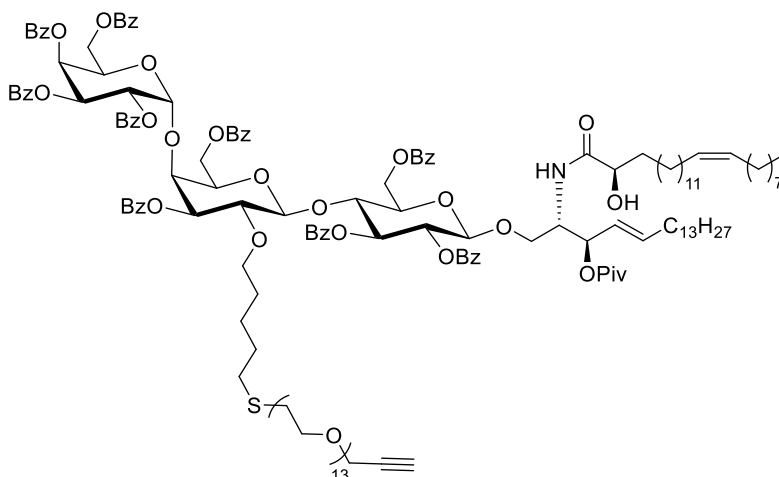

The reduction of azide **23** (25.0 mg, 9.82  $\mu$ mol, 1.00 eq.) was performed according to general procedure **GP3** using triphenylphosphine (5.93 mg, 24.5  $\mu$ mol, 2.50 eq.) in benzene (2.0 mL) and water (3 drops). The amine was dissolved in THF (1.0 mL) and fatty acid **14**<sup>[5]</sup> (5.62 mg, 14.7  $\mu$ mol, 1.30 eq.), DIPEA (2.56  $\mu$ L, 1.90 mg, 14.7  $\mu$ mol, 1.30 eq.) and a solution of HATU (5.59 mg, 14.7  $\mu$ mol, 1.30 eq.) in DMF (0.50 mL) were added. The reaction mixture was stirred for 17 h. Gel permeation HPLC, followed by column chromatography (SiO<sub>2</sub>, CH<sub>2</sub>Cl<sub>2</sub>/MeOH, 40:1  $\rightarrow$  30:1) and again gel permeation HPLC afforded glycolipid **46** (4.40 mg, 1.53  $\mu$ mol, 16 %) as a colorless oil.

$[\alpha]_D^{25} = +34.3$  (c 0.80, CHCl<sub>3</sub>).

**<sup>1</sup>H-NMR** (500 MHz, CDCl<sub>3</sub>):  $\delta$  (ppm) = 0.82–0.93 (m, 9 H), 1.05 (s, 9 H), 1.20–1.31 (m, 67 H), 1.84–1.95 (m, 2 H), 1.97–2.05 (m, 4 H), 2.09–2.19 (m, 1 H), 2.44 (t,  $J = 2.4$  Hz, 1 H), 2.48 (d,  $J = 4.7$  Hz, 1 H), 2.56 (t,  $J = 7.2$  Hz, 2 H), 3.38–3.47 (m, 1 H), 3.53 (t,  $J = 7.2$  Hz, 2 H), 3.56–3.74 (m, 46 H), 3.74–3.82 (m, 1 H), 3.92–4.00 (m, 2 H), 4.05–4.18 (m, 4 H), 4.20 (d,  $J = 2.4$  Hz, 2 H), 4.20–4.29 (m, 1 H), 4.46 (dd,  $J = 11.2, 5.7$  Hz, 1 H), 4.53 (dd,  $J = 12.1, 4.3$  Hz, 1 H), 4.58 (d,  $J = 7.5$  Hz, 1 H), 4.58–4.65 (m, 1 H), 4.74 (d,  $J = 7.8$  Hz, 1 H), 4.89–4.96 (m<sub>c</sub>, 1 H), 5.06 (dd,  $J = 10.3, 2.9$  Hz, 1 H), 5.14–5.21 (m<sub>c</sub>, 1 H), 5.27 (dd,  $J = 15.4, 7.4$  Hz, 1 H), 5.33–5.40 (m, 3 H), 5.48 (d,  $J = 3.5$  Hz, 1 H), 5.57–5.69 (m, 2 H), 5.78 (t,  $J = 8.8$  Hz, 1 H), 5.81 (dd,  $J = 10.3, 2.9$  Hz, 1 H), 5.98 (dd,  $J = 3.5, 1.5$  Hz, 1 H), 6.74 (d,  $J = 9.4$  Hz, 1 H), 7.19–7.26 (m, 4 H), 7.32–7.63 (m, 23 H), 7.74–7.83 (m, 6 H), 7.91–8.12 (m, 12 H)

**<sup>13</sup>C-NMR** (151 MHz, CDCl<sub>3</sub>):  $\delta$  (ppm) = 14.1, 22.7, 25.0, 25.3, 26.9, 27.2, 27.2, 28.9, 29.2, 29.3, 29.4, 29.4, 29.5, 29.5, 29.5, 29.6, 29.6, 29.7, 29.7, 29.8, 29.8, 31.2, 31.9, 31.9, 32.1, 32.2, 34.5, 38.7, 50.0, 58.4, 61.4, 61.8, 62.4, 66.6, 67.6, 67.9, 69.0, 69.1, 70.0, 70.2, 70.4, 70.5, 70.6, 70.8, 72.0, 72.4, 72.4, 72.6, 73.0, 73.6, 73.7, 74.6, 74.8, 75.2, 75.9, 77.6, 79.6, 97.8, 100.2, 103.0,

## SUPPORTING INFORMATION

124.6, 128.3, 128.4, 128.4, 128.5, 128.6, 128.7, 129.1, 129.2, 129.3, 129.4, 129.5, 129.5, 129.6, 129.6, 129.8, 129.9, 129.9, 133.1, 133.1, 133.2, 133.3, 133.4, 133.5, 133.7, 137.0, 165.2, 165.2, 165.6, 165.7, 165.8, 166.0, 166.1, 173.6, 176.8.

**IR** (ATR):  $\tilde{\nu}$  (cm<sup>-1</sup>) = 2924, 2856, 1728, 1455, 1353, 1315, 1270, 1102, 1037, 1031, 845, 713.

**MS** (ESI):  $m/z$  (%) = 984.1 (30) [M+3Na]<sup>3+</sup>, 1464.7 (100) [M+2Na]<sup>2+</sup>, 2906.5 (2) [M+Na]<sup>+</sup>. **HRMS** (ESI):  $m/z$  calculated for: C<sub>162</sub>H<sub>219</sub>NO<sub>42</sub>S [M+Na]<sup>+</sup>: 2906.4678, found: 2906.4626.

**O-(2,4,3,6-Tetra-O-benzoyl- $\alpha$ -D-galactopyranosyl)-(1 $\rightarrow$ 4)-(3,6-di-O-benzoyl-2-O-(9,12,15-trioxa-6-thiaoctadec-17-yne-1-yl)- $\beta$ -D-galactopyranosyl)-(1 $\rightarrow$ 4)-2,3,6-tri-O-benzoyl- $\beta$ -D-glucopyranosyl-(1 $\rightarrow$ 1)-(2S,3R,4E,2'R,15'E)-2-(2'-hydroxy-15'-tetracosenamido)-3-O-pivaloyl-4-octadecene-1,3-diol (47)**

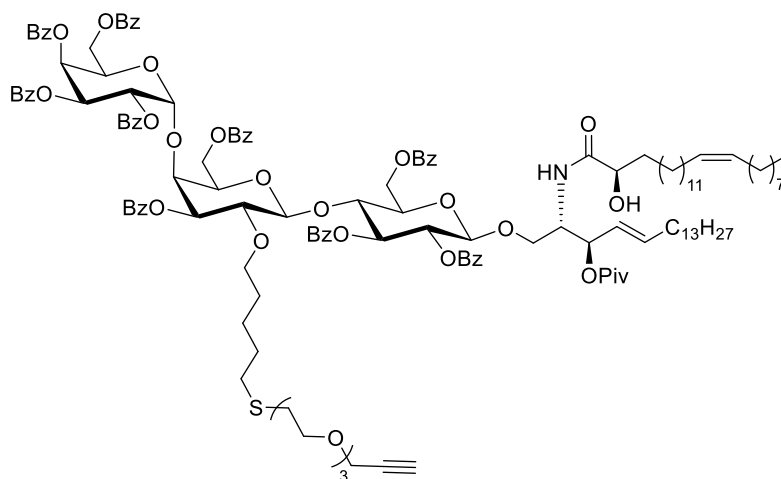

The reduction of azide **24** (22.0 mg, 10.4  $\mu$ mol, 1.00 eq.) was performed according to general procedure **GP3** with triphenylphosphine (6.85 mg, 26.1  $\mu$ mol, 2.50 eq.) in benzene (5.2 mL) and water (5 drops). The resulting amine was dissolved in THF (1.1 mL) and was reacted with fatty acid **14**<sup>[5]</sup> (5.17 mg, 13.5  $\mu$ mol, 1.30 eq.), DIPEA (2.35  $\mu$ L, 1.75 mg, 13.5  $\mu$ mol, 1.30 eq.) and a solution of HATU (5.13 mg, 13.5  $\mu$ mol, 1.30 eq.) in DMF (0.55 mL). The reaction mixture was stirred for 16 h at ambient temperature. Column chromatography on silica gel (*n*-pentane/EtOAc, 3:1  $\rightarrow$  2:1) afforded glycolipid **47** (11.7 mg, 4.79  $\mu$ mol, 46 %) as a colorless oil.

$[\alpha]_D^{28} = +37.4$  (c 1.17, CHCl<sub>3</sub>).

**<sup>1</sup>H-NMR** (600 MHz, CDCl<sub>3</sub>):  $\delta$  (ppm) = 0.80–0.91 (m, 8 H), 0.93–1.00 (m, 2 H), 1.05 (s, 9 H), 1.11–1.41 (m, 59 H), 1.87–1.94 (m, 2 H), 1.98–2.04 (m, 4 H), 2.09–2.23 (m, 2 H), 2.43 (t,  $J$  = 2.4 Hz, 1 H), 2.48 (d,  $J$  = 4.6 Hz, 1 H), 2.57 (t,  $J$  = 7.1 Hz, 2 H), 3.43 (dd,  $J$  = 15.9, 6.9 Hz, 1 H), 3.54 (t,  $J$  = 7.1 Hz, 2 H), 3.56–3.72 (m, 11 H), 3.75–3.81 (m, 1 H), 3.92–4.00 (m, 2 H), 4.05–4.18 (m, 4 H), 4.19 (d,  $J$  = 2.4 Hz, 2 H), 4.20–4.30 (m, 2 H), 4.45 (dd,  $J$  = 11.2, 5.7 Hz, 1 H), 4.53 (dd,  $J$  = 12.1, 4.4 Hz, 1 H), 4.58 (d,  $J$  = 7.5 Hz, 1 H), 4.59–4.64 (mc, 1 H), 4.74 (d,  $J$  = 7.8 Hz, 1 H), 4.90–4.96 (m, 1 H), 5.07 (dd,  $J$  = 10.3, 2.9 Hz, 1 H), 5.18 (t,  $J$  = 7.3 Hz, 1 H),

## SUPPORTING INFORMATION

5.27 (dd,  $J = 15.3, 7.4$  Hz, 1 H), 5.32–5.39 (m, 3 H), 5.48 (d,  $J = 3.5$  Hz, 1 H), 5.60–5.69 (m, 2 H), 5.78 (t,  $J = 9.4$  Hz, 1 H), 5.81 (dd,  $J = 10.9, 3.5$  Hz, 1 H), 5.99 (dd,  $J = 3.5, 1.4$  Hz, 1 H), 6.75 (d,  $J = 9.4$  Hz, 1 H), 7.16–7.25 (m, 5 H), 7.32–7.47 (m, 16 H), 7.47–7.60 (m, 6 H), 7.74–7.85 (m, 6 H), 7.92–8.15 (m, 12 H).

$^{13}\text{C-NMR}$  (151 MHz,  $\text{CDCl}_3$ ):  $\delta$  (ppm) = 14.1, 22.7, 22.7, 25.0, 25.3, 26.9, 27.2, 27.2, 28.8, 29.2, 29.3, 29.4, 29.4, 29.5, 29.5, 29.6, 29.6, 29.7, 29.7, 29.8, 29.8, 31.2, 31.9, 31.9, 32.1, 32.2, 34.5, 38.7, 50.0, 58.4, 61.4, 61.8, 62.4, 66.5, 67.6, 67.9, 69.0, 69.1, 70.0, 70.2, 70.4, 70.6, 70.8, 72.0, 72.4, 72.4, 72.6, 73.0, 73.6, 73.7, 74.6, 74.8, 75.2, 75.9, 77.6, 79.6, 97.8, 100.2, 103.0, 124.6, 128.3, 128.4, 128.4, 128.5, 128.6, 128.7, 129.1, 129.2, 129.3, 129.4, 129.5, 129.5, 129.6, 129.6, 129.8, 129.9, 129.9, 133.1, 133.1, 133.2, 133.3, 133.4, 133.5, 133.7, 137.0, 165.2, 165.2, 165.6, 165.7, 165.8, 166.0, 166.1, 173.6, 176.8.

**IR** (ATR):  $\tilde{\nu}$  ( $\text{cm}^{-1}$ ) = 2925, 2855, 1728, 1676, 1454, 1316, 1270, 1100, 1070, 1005, 712.

**MS** (ESI):  $m/z$  (%) = 1244.1 (100)  $[\text{M}+2\text{Na}]^{2+}$ , 2465.2 (83)  $[\text{M}+\text{Na}]^+$ . **HRMS** (ESI):  $m/z$  calculated for:  $\text{C}_{142}\text{H}_{179}\text{NO}_{32}\text{S}$   $[\text{M}+\text{Na}]^+$ : 2465.2023, found: 2465.2007.

**O-( $\alpha$ -D-Galactopyranosyl)-(1 $\rightarrow$ 4)-(2-O-(9,12,15,18,21,24,27,30,33,36,39,42,45-tridecaoxa-6-thiaoctatetracont-47-yne-1-yl)- $\beta$ -D-galactopyranosyl)-(1 $\rightarrow$ 4)- $\beta$ -D-glucopyranosyl-(1 $\rightarrow$ 1)-(2S,3R,4E)-2-(tetracosanamido)-4-octadecene-1,3-diol (25)**

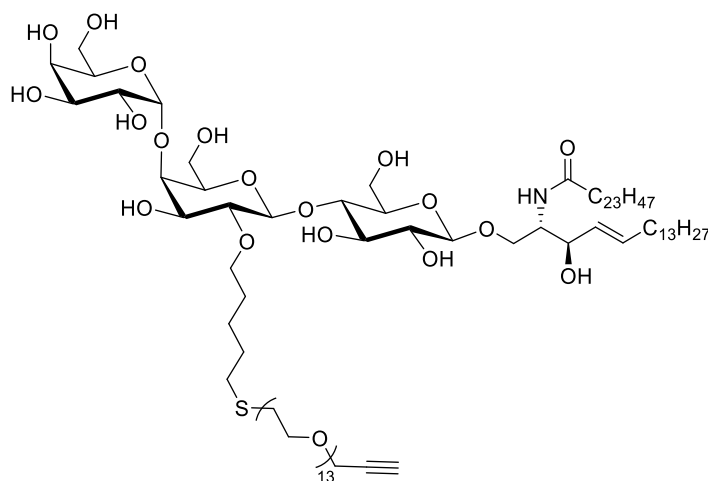

The deprotection of glycolipid **40** (14.0 mg, 4.88  $\mu\text{mol}$ , 1.00 eq.) was performed according to general procedure **GP4** in methanol (0.75 mL) and dichloromethane (0.25 mL) for 24 h at 50  $^{\circ}\text{C}$ . After a dialysis of 2 d with 5 L of  $\text{H}_2\text{O}$  and subsequent lyophilization glycolipid **25** (6.60 mg, 3.57  $\mu\text{mol}$ , 73 %) was obtained as a colorless powder.

$[\alpha]_{\text{D}}^{21} = +20.4$  (c 0.54,  $\text{CHCl}_3/\text{MeOH}/\text{H}_2\text{O}$ , 1.6:1:0.2).

$^1\text{H-NMR}$  (600 MHz,  $\text{CDCl}_3/\text{MeOD}/\text{D}_2\text{O}$ , 1.6:1.0:0.2):  $\delta$  (ppm) = 0.76–0.94 (m, 8 H), 1.02–1.47 (m, 60 H), 1.55–1.65 (m, 6 H), 1.68–1.90 (m, 3 H), 1.98–2.06 (m, 3 H), 2.17 (t,  $J = 7.6$  Hz, 2 H),

## SUPPORTING INFORMATION

2.19–2.25 (m, 1 H), 2.56 (t,  $J = 7.3$  Hz, 2 H), 2.61–2.66 (m, 1 H), 2.69–2.75 (m<sub>c</sub>, 2 H), 2.80–2.86 (m<sub>c</sub>, 1 H), 3.23–3.29 (m, 1 H), 3.36–3.42 (m, 2 H), 3.50–3.60 (m, 3 H), 3.57–3.91 (m, 53 H), 3.95–4.01 (m, 3 H), 4.08 (t,  $J = 8.1$  Hz, 1 H), 4.15–4.21 (m, 1 H), 4.22 (d,  $J = 2.3$  Hz, 2 H), 4.27 (t,  $J = 6.1$  Hz, 1 H), 4.44 (d,  $J = 7.7$  Hz, 1 H), 4.94 (d,  $J = 3.2$  Hz, 1 H), 5.44 (dd,  $J = 15.4, 7.7$  Hz, 1 H), 5.66–5.75 (m, 1 H).

Further signals were covered by the signals of the solvents.

**<sup>13</sup>C-NMR** (151 MHz, CDCl<sub>3</sub>/MeOD/D<sub>2</sub>O, 1.6:1.0:0.2):  $\delta$  (ppm) = 14.4, 23.1, 23.1, 25.6, 26.4, 29.7, 29.8, 29.8, 29.9, 29.9, 29.9, 30.0, 30.0, 30.1, 30.1, 30.2, 31.6, 32.3, 32.4, 32.7, 32.9, 36.9, 53.6, 58.7, 60.8, 62.0, 64.1, 67.1, 69.3, 70.0, 70.1, 70.1, 70.5, 70.5, 70.6, 70.6, 70.7, 71.1, 71.8, 72.2, 73.5, 73.7, 73.9, 75.0, 75.4, 75.5, 75.6, 79.4, 79.7, 80.3, 101.6, 103.2, 103.6, 129.7, 135.1, 175.1.

**IR** (ATR):  $\tilde{\nu}$  (cm<sup>-1</sup>) = 3343, 2918, 2850, 1639, 1546, 1464, 1355, 1296, 1257, 1076, 1028, 808, 719.

**MS** (ESI):  $m/z$  (%) = 947.1 (100) [M+2Na]<sup>2+</sup>, 1871.2 (11) [M+Na]<sup>+</sup>. **HRMS** (ESI):  $m/z$  calculated for: C<sub>94</sub>H<sub>177</sub>NO<sub>31</sub>S [M+Na]<sup>+</sup>: 1871.1918, found: 1871.1925.

**O-( $\alpha$ -D-Galactopyranosyl)-(1 $\rightarrow$ 4)-(2-O-(9,12,15-trioxa-6-thiooctadec-17-yne-1-yl)- $\beta$ -D-galactopyranosyl)-(1 $\rightarrow$ 4)- $\beta$ -D-glucopyranosyl-(1 $\rightarrow$ 1)-(2S,3R,4E)-2-(tetracosanamido)-4-octadecene-1,3-diol (26)**

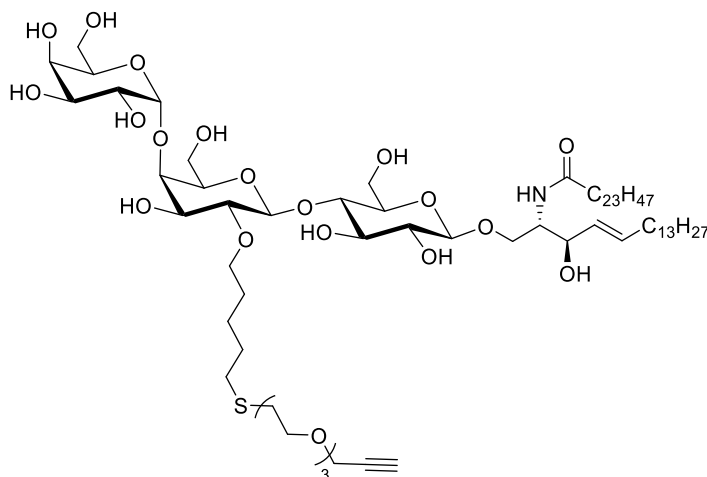

The deprotection of glycolipid **41** (12.5 mg, 5.14  $\mu$ mol, 1.00 eq.) was performed according to general procedure **GP4** in methanol (2.0 mL) and dichloromethane (0.60 mL) in 24 h at 50 °C. After dialysis (2 d with 5 L H<sub>2</sub>O) and subsequent lyophilization deprotected glycolipid **26** (7.60 mg, 5.04  $\mu$ mol, 98 %) was obtained as a colorless powder.

$[\alpha]_D^{21} = +23.5$  (c 0.60, CHCl<sub>3</sub>/MeOH/H<sub>2</sub>O, 1.6:1.0:0.2).

## SUPPORTING INFORMATION

**<sup>1</sup>H-NMR** (600 MHz, CDCl<sub>3</sub>/MeOD/D<sub>2</sub>O, 1.6:1.0:0.2):  $\delta$  (ppm) = 0.89 (t,  $J$  = 6.9 Hz, 6 H), 1.11–1.64 (m, 64 H), 1.96–2.07 (m, 2 H), 2.17 (t,  $J$  = 7.6 Hz, 2 H), 2.57 (t,  $J$  = 7.3 Hz, 2 H), 2.63 (t,  $J$  = 2.4 Hz, 1 H), 2.72 (t,  $J$  = 6.9 Hz, 2 H), 3.26 (dd,  $J$  = 10.0, 7.7 Hz, 1 H), 3.35–3.41 (m, 1 H), 3.52–3.59 (m, 2 H), 3.60–3.75 (m, 14 H), 3.76–3.91 (m, 7 H), 3.94–4.01 (m, 3 H), 4.05–4.11 (mc, 1 H), 4.15–4.23 (m, 1 H), 4.22 (d,  $J$  = 2.4 Hz, 2 H), 4.24–4.30 (mc, 1 H), 4.32 (d,  $J$  = 7.8 Hz, 1 H), 4.44 (d,  $J$  = 7.8 Hz, 1 H), 4.94 (d,  $J$  = 3.2 Hz, 1 H), 5.44 (dd,  $J$  = 15.4, 7.7 Hz, 1 H), 5.66–5.74 (mc, 1 H).

Further signals were covered by signals of the solvent mixture.

**<sup>13</sup>C-NMR** (151 MHz, CDCl<sub>3</sub>/MeOD/D<sub>2</sub>O, 1.6:1.0:0.2):  $\delta$  (ppm) = 14.5, 14.5, 23.2, 23.3, 25.7, 26.6, 29.9, 29.9, 30.0, 30.0, 30.1, 30.2, 30.2, 30.2, 30.3, 30.3, 30.4, 31.8, 32.5, 32.5, 32.8, 33.0, 37.1, 53.7, 58.9, 60.4, 61.0, 62.1, 69.3, 69.5, 69.6, 70.2, 70.3, 70.7, 70.8, 70.9, 71.3, 72.0, 72.4, 73.6, 73.8, 74.1, 75.2, 75.6, 75.7, 75.8, 78.8, 79.5, 79.9, 80.5, 101.7, 103.4, 103.8, 129.8, 135.3, 175.3.

**IR** (ATR):  $\tilde{\nu}$  (cm<sup>-1</sup>) = 3335, 2918, 2850, 1638, 1549, 1465, 1373, 1292, 1256, 1076, 1027, 719.

**MS** (ESI):  $m/z$  (%) = 727.0 (80) [M+2Na]<sup>2+</sup>, 1430.9 (100) [M+Na]<sup>+</sup>. **HRMS** (ESI):  $m/z$  calculated for: C<sub>74</sub>H<sub>137</sub>NO<sub>21</sub>S [M+Na]<sup>+</sup>: 1430.9296, found: 1430.9298.

**O-( $\alpha$ -D-Galactopyranosyl)-(1 $\rightarrow$ 4)-(2-O-(9,12,15,18,21,24,27,30,33,36,39,42,45-tridecaoxa-6-thiaoctatetracont-47-yne-1-yl)- $\beta$ -D-galactopyranosyl)-(1 $\rightarrow$ 4)- $\beta$ -D-glucopyranosyl-(1 $\rightarrow$ 1)-(2S,3R,4E,2'R)-2-(2'-hydroxytetracosanamido)-4-octadecene-1,3-diol (27)**

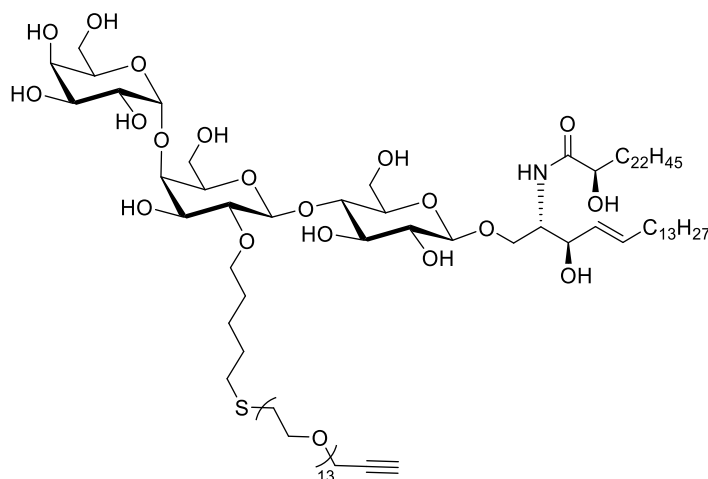

The deprotection of glycolipid **42** (14.0 mg, 4.68  $\mu$ mol, 1.00 eq.) was performed according to general procedure **GP4** in methanol (1.8 mL) and dichloromethane (0.60 mL) for 30 h at 50 °C. After dialysis (2 d with 5 L of H<sub>2</sub>O) and subsequent lyophilization glycolipid **27** (6.50 mg, 3.48  $\mu$ mol, 74 %) was obtained as a colorless powder.

$[\alpha]_D^{24}$  = +19.5 (c 0.65, CHCl<sub>3</sub>/MeOH/H<sub>2</sub>O, 1.6:1.0:0.2).

## SUPPORTING INFORMATION

**<sup>1</sup>H-NMR** (600 MHz, CDCl<sub>3</sub>/MeOD/D<sub>2</sub>O, 1.6:1.0:0.2): δ (ppm) = 0.82–1.01 (m, 9 H), 1.07–1.52 (m, 66 H), 1.52–1.65 (m, 7 H), 1.66–1.76 (m, 2 H), 1.98–2.07 (m, 3 H), 2.54–2.60 (m<sub>c</sub>, 2 H), 2.63 (t, *J* = 2.4 Hz, 1 H), 2.72 (t, *J* = 6.9 Hz, 2 H), 3.26 (dd, *J* = 10.0, 7.7 Hz, 1 H), 3.29–3.32 (m<sub>c</sub>, 1 H), 3.39 (dt, *J* = 9.7, 3.0 Hz, 1 H), 3.51–3.59 (m, 2 H), 3.59–3.78 (m, 47 H), 3.79–3.93 (m, 5 H), 3.94–4.02 (m, 3 H), 4.03 (dd, *J* = 7.9, 3.9 Hz, 1 H), 4.06–4.12 (m, 2 H), 4.22 (d, *J* = 2.4 Hz, 2 H), 4.25–4.29 (m<sub>c</sub>, 1 H), 4.33 (d, *J* = 7.9 Hz, 1 H), 4.44 (d, *J* = 7.8 Hz, 1 H), 4.93 (d, *J* = 3.0 Hz, 1 H), 5.43 (dd, *J* = 15.4, 7.5 Hz, 1 H), 5.69–5.77 (m<sub>c</sub>, 1 H).

Further signals were covered by signals of the solvent mixture.

**<sup>13</sup>C-NMR** (151 MHz, CDCl<sub>3</sub>/MeOD/D<sub>2</sub>O, 1.6:1.0:0.2): δ (ppm) = 14.6, 14.6, 23.3, 23.3, 25.8, 25.8, 29.8, 29.9, 30.0, 30.1, 30.2, 30.2, 30.3, 30.3, 30.4, 31.8, 32.5, 32.5, 32.9, 33.1, 35.2, 53.7, 58.9, 60.4, 61.0, 62.1, 69.2, 69.5, 70.3, 70.7, 70.7, 70.9, 70.9, 71.2, 72.0, 72.4, 72.7, 73.7, 74.1, 75.2, 75.6, 75.7, 75.8, 78.7, 79.5, 79.9, 80.5, 101.7, 103.4, 103.8, 129.4, 135.4, 176.6.

**IR** (ATR):  $\tilde{\nu}$  (cm<sup>-1</sup>) = 3379, 2918, 2851, 1726, 1639, 1540, 1464, 1351, 1256, 1083, 1030, 804.

**MS** (ESI): *m/z* (%) = 644.4 (29) [M+3Na]<sup>3+</sup>, 955.1 (100) [M+2Na]<sup>2+</sup>, 1888.2 (7) [M+Na]<sup>+</sup>. **HRMS** (ESI): *m/z* calculated for: C<sub>94</sub>H<sub>177</sub>NO<sub>32</sub>S [M+Na]<sup>+</sup>: 1888.1900, found: 1888.1906.

**O-(α-D-Galactopyranosyl)-(1→4)-(2-O-(9,12,15-trioxa-6-thiooctadec-17-yne-1-yl)-β-D-galactopyranosyl)-(1→4)-β-D-glucopyranosyl-(1→1)-(2S,3R,4E,2'R)-2-(2'-hydroxy-tetracosanamido)-4-octadecene-1,3-diol (28)**

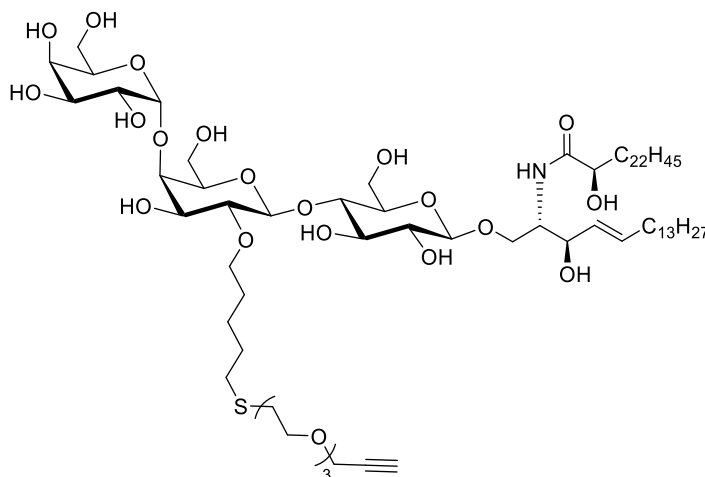

The deprotection of glycolipid **43** (17.5 mg, 6.86 μmol, 1.00 eq.) was performed according to general procedure **GP4** in methanol (2.6 mL) and dichloromethane (0.90 mL) in 22 h at 50 °C. After dialysis (2 d, 5 L H<sub>2</sub>O) and subsequent lyophilization deprotected glycolipid **28** (7.00 mg, 4.91 μmol, 72 %) was obtained as colorless powder.

$[\alpha]_D^{25} = +24.4$  (c 0.77, CHCl<sub>3</sub>/MeOH/H<sub>2</sub>O, 1.6:1.0:0.2).



## SUPPORTING INFORMATION

**<sup>1</sup>H-NMR** (600 MHz, CDCl<sub>3</sub>/MeOD/D<sub>2</sub>O, 1.6:1.0:0.2):  $\delta$  (ppm) = 0.86–0.93 (m, 6 H), 1.14–1.47 (m, 66 H), 1.52–1.65 (m, 4 H), 1.67–1.78 (m, 2 H), 1.97–2.05 (m, 2 H), 2.54–2.60 (m<sub>c</sub>, 2 H), 2.64 (t,  $J$  = 2.4 Hz, 1 H), 2.72 (t,  $J$  = 6.9 Hz, 2 H), 3.26 (dd,  $J$  = 10.0, 7.7 Hz, 1 H), 3.31 (dd,  $J$  = 9.3, 8.0 Hz, 1 H), 3.36–3.42 (m<sub>c</sub>, 1 H), 3.52–3.58 (m<sub>c</sub>, 1 H), 3.60–3.76 (m, 16 H), 3.78 (dd,  $J$  = 11.6, 5.3 Hz, 1 H), 3.81–3.92 (m, 5 H), 3.95–4.02 (m, 3 H), 4.03 (dd,  $J$  = 7.9, 3.9 Hz, 1 H), 4.06–4.11 (m, 2 H), 4.22 (d,  $J$  = 2.4 Hz, 2 H), 4.26–4.29 (m<sub>c</sub>, 1 H), 4.33 (d,  $J$  = 7.8 Hz, 1 H), 4.44 (d,  $J$  = 7.7 Hz, 1 H), 4.93 (d,  $J$  = 2.2 Hz, 1 H), 5.43 (dd,  $J$  = 15.4, 7.5 Hz, 1 H), 5.69–5.77 (m<sub>c</sub>, 1 H).

**<sup>13</sup>C-NMR** (151 MHz, CDCl<sub>3</sub>/MeOD/D<sub>2</sub>O, 1.6:1.0:0.2):  $\delta$  (ppm) = 14.6, 23.3, 23.3, 25.8, 25.8, 29.8, 30.0, 30.0, 30.1, 30.2, 30.3, 30.3, 30.4, 30.4, 30.5, 31.8, 32.6, 32.6, 32.9, 33.1, 35.2, 53.7, 58.9, 60.5, 61.0, 62.1, 69.2, 69.6, 69.6, 70.3, 70.7, 70.8, 71.0, 71.3, 72.0, 72.4, 72.7, 73.7, 74.1, 75.2, 75.7, 75.7, 75.9, 78.8, 79.5, 79.9, 80.6, 101.8, 103.4, 103.8, 129.5, 135.5, 176.7.

**IR** (ATR):  $\tilde{\nu}$  (cm<sup>-1</sup>) = 3365, 2919, 2851, 1646, 1535, 1464, 1353, 1295, 1257, 1078, 1029, 807, 718.

**MS** (ESI):  $m/z$  (%) = 1446.9 (100) [M+Na]<sup>+</sup>. **HRMS** (ESI):  $m/z$  calculated for: C<sub>74</sub>H<sub>137</sub>NO<sub>22</sub>S [M+Na]<sup>+</sup>: 1446.9245, found: 1446.9246.

**O-( $\alpha$ -D-Galactopyranosyl)-(1 $\rightarrow$ 4)-(2-O-(9,12,15,18,21,24,27,30,33,36,39,42,45-tridecaoxa-6-thiaoctatetracont-47-yne-1-yl)- $\beta$ -D-galactopyranosyl)-(1 $\rightarrow$ 4)- $\beta$ -D-glucopyranosyl-(1 $\rightarrow$ 1)-(2S,3R,4E,15'Z)-2-(15'-tetracosenamido)-4-octadecene-1,3-diol (29)**

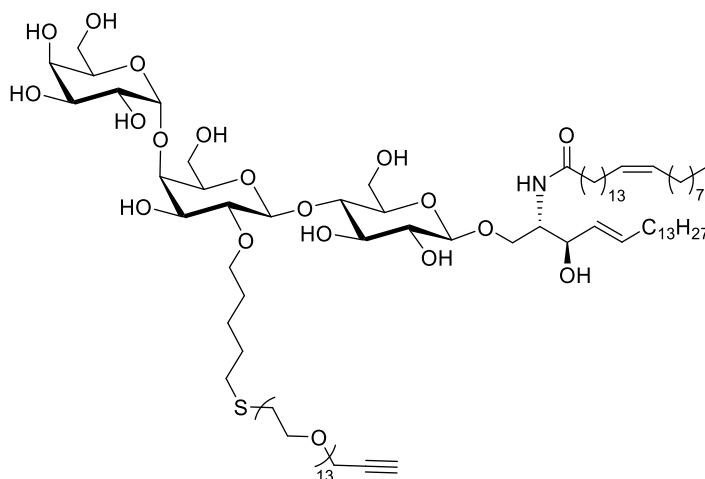

The deprotection of glycolipid **44** (10.9 mg, 3.80  $\mu$ mol, 1.00 eq.) was performed according to general procedure **GP4** in methanol (0.60 mL) and dichloromethane (0.20 mL) for 28 h at 50 °C. After a dialysis of 2 d with 5 L of H<sub>2</sub>O and subsequent lyophilization deprotected glycolipid **29** (7.00 mg, 3.79  $\mu$ mol, quant.) was isolated as a colorless powder.

$[\alpha]_D^{24}$  = +22.7 (c 0.70, CHCl<sub>3</sub>/MeOH/H<sub>2</sub>O, 1.6:1.0:0.2).

## SUPPORTING INFORMATION

**<sup>1</sup>H-NMR** (600 MHz, CDCl<sub>3</sub>/MeOD/D<sub>2</sub>O, 1.6:1.0:0.2):  $\delta$  (ppm) = 0.83–0.95 (m, 8 H), 1.10–1.49 (m, 54 H), 1.52–1.66 (m, 8 H), 1.91–2.09 (m, 6 H), 2.18 (t,  $J$  = 7.6 Hz, 2 H), 2.57 (t,  $J$  = 7.3 Hz, 2 H), 2.66 (d,  $J$  = 2.4 Hz, 1 H), 2.72 (t,  $J$  = 6.9 Hz, 2 H), 3.26 (dd,  $J$  = 10.0, 7.7 Hz, 1 H), 3.53–3.92 (m, 55 H), 3.95–4.00 (m, 3 H), 4.05–4.11 (mc, 1 H), 4.19–4.24 (m, 1 H), 4.22 (d,  $J$  = 2.4 Hz, 2 H), 4.27 (t,  $J$  = 6.1 Hz, 1 H), 4.32 (d,  $J$  = 7.9 Hz, 1 H), 4.44 (d,  $J$  = 7.7 Hz, 1 H), 4.95 (d,  $J$  = 3.4 Hz, 1 H), 5.31–5.40 (mc, 2 H), 5.44 (dd,  $J$  = 15.3, 7.8 Hz, 1 H), 5.66–5.74 (mc, 1 H).

Further signals were covered by signals of the solvent mixture.

**<sup>13</sup>C-NMR** (151 MHz, CDCl<sub>3</sub>/MeOD/D<sub>2</sub>O, 1.6:1.0:0.2):  $\delta$  (ppm) = 14.5, 23.3, 23.3, 25.8, 26.7, 27.8, 29.9, 29.9, 29.9, 30.0, 30.1, 30.1, 30.1, 30.2, 30.2, 30.2, 30.3, 30.3, 30.3, 31.8, 32.5, 32.5, 32.9, 33.0, 37.1, 53.8, 58.9, 60.5, 61.0, 62.2, 69.4, 69.5, 69.6, 70.3, 70.7, 70.7, 70.9, 70.9, 71.3, 72.1, 72.4, 73.8, 73.9, 74.1, 75.2, 75.6, 75.7, 75.8, 79.0, 79.7, 79.9, 80.6, 101.9, 103.4, 103.9, 130.0, 130.5, 135.3, 175.3.

**IR** (ATR):  $\tilde{\nu}$  (cm<sup>-1</sup>) = 3383, 2921, 2853, 2603, 2496, 1644, 1548, 1467, 1446, 1398, 1352, 1250, 1080, 1032, 806.

**MS** (ESI):  $m/z$  (%) = 638.4 (33) [M+3Na]<sup>3+</sup>, 946.1 (100) [M+2Na]<sup>2+</sup>, 1870.2 (9) [M+Na]<sup>+</sup>. **HRMS** (ESI):  $m/z$  calculated for: C<sub>94</sub>H<sub>175</sub>NO<sub>31</sub>S [M+Na]<sup>+</sup>: 1869.1761, found: 1869.1768.

**O-( $\alpha$ -D-Galactopyranosyl)-(1 $\rightarrow$ 4)-(2-O-(9,12,15-trioxa-6-thiooctadec-17-yne-1-yl)- $\beta$ -D-galactopyranosyl)-(1 $\rightarrow$ 4)- $\beta$ -D-glucopyranosyl-(1 $\rightarrow$ 1)-(2S,3R,4E,15'Z)-2-(15'-tetra-cosenamido)-4-octadecene-1,3-diol (30)**

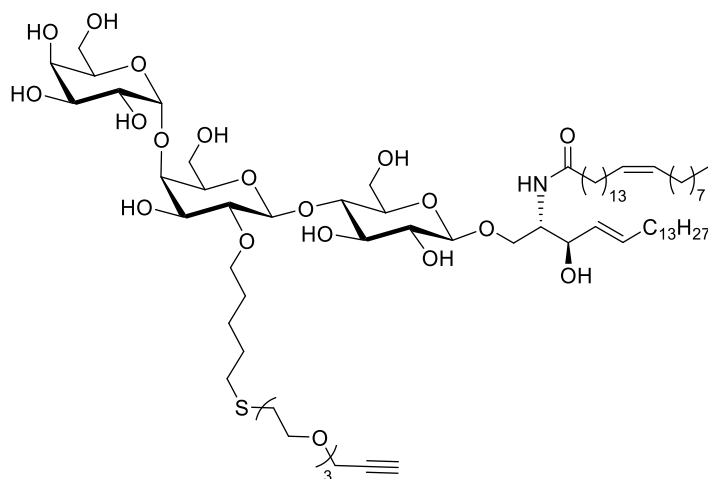

The deprotection of glycolipid **45** (17.4 mg, 7.17  $\mu$ mol, 1.00 eq.) was performed according to general procedure **GP4** in methanol (2.7 mL) and dichloromethane (0.90 mL) in 24 h at 50 °C. After dialysis (2 d, 5 L H<sub>2</sub>O) and subsequent lyophilization the unprotected glycolipid **30** (10.0 mg, 7.10  $\mu$ mol, 99 %) was obtained as a colorless powder.

$[\alpha]_D^{23}$  = +18.2 (c 0.66, CHCl<sub>3</sub>/MeOH/H<sub>2</sub>O, 1.6:1:0.2).

## SUPPORTING INFORMATION

**$^1\text{H-NMR}$**  (600 MHz,  $\text{CDCl}_3/\text{MeOD}/\text{D}_2\text{O}$ , 1.6:1.0:0.2):  $\delta$  (ppm) = 0.89 (t,  $J = 6.9$  Hz, 6 H), 1.19–1.44 (m, 54 H), 1.50–1.66 (m, 6 H), 1.95–2.07 (m, 6 H), 2.17 (t,  $J = 7.6$  Hz, 2 H), 2.57 (t,  $J = 7.3$  Hz, 2 H), 2.64 (d,  $J = 2.3$  Hz, 1 H), 2.72 (t,  $J = 6.9$  Hz, 2 H), 3.26 (dd,  $J = 10.0, 7.7$  Hz, 1 H), 3.36–3.41 (m, 1 H), 3.53–3.59 (m, 2 H), 3.60–3.76 (m, 14 H), 3.78–3.93 (m, 6 H), 3.92–4.01 (m, 3 H), 4.08 (t,  $J = 8.1$  Hz, 1 H), 4.16–4.21 (m, 1 H), 4.22 (d,  $J = 2.4$  Hz, 2 H), 4.24–4.30 (m<sub>c</sub>, 1 H), 4.32 (d,  $J = 7.8$  Hz, 1 H), 4.44 (d,  $J = 7.7$  Hz, 1 H), 4.94 (d,  $J = 2.9$  Hz, 1 H), 5.31–5.40 (m, 2 H), 5.44 (dd,  $J = 15.3, 7.8$  Hz, 1 H), 5.65–5.74 (m, 1 H).

Further signals were covered by signals of the solvent mixture.

**$^{13}\text{C-NMR}$**  (126 MHz,  $\text{CDCl}_3/\text{MeOD}/\text{D}_2\text{O}$ , 1.6:1.0:0.2):  $\delta$  (ppm) = 14.5, 23.3, 25.7, 26.6, 27.8, 27.8, 29.9, 29.9, 30.0, 30.1, 30.2, 30.2, 30.2, 30.3, 30.3, 30.4, 30.4, 31.8, 32.5, 32.5, 32.9, 33.0, 37.1, 53.8, 58.9, 60.4, 61.0, 62.1, 69.4, 69.6, 70.3, 70.7, 70.8, 71.3, 72.0, 72.4, 73.7, 73.8, 74.1, 75.2, 75.6, 75.7, 75.8, 78.8, 79.5, 79.9, 80.5, 101.8, 103.4, 103.8, 129.9, 130.5, 135.3, 175.3.

**IR** (ATR):  $\tilde{\nu}$  ( $\text{cm}^{-1}$ ) = 3348, 3314, 2921, 2852, 2160, 2027, 1975, 1711, 1644, 1547, 1462, 1354, 1078, 1029, 807.

**MS** (ESI):  $m/z$  (%) = 725.5 (37)  $[\text{M}+2\text{Na}]^{2+}$ , 1428.9 (100)  $[\text{M}+\text{Na}]^+$ . **HRMS** (ESI):  $m/z$  calculated for:  $\text{C}_{74}\text{H}_{135}\text{NO}_{21}\text{S}$   $[\text{M}+\text{Na}]^+$ : 1428.9140, found: 1428.9142.

***O*-( $\alpha$ -D-Galactopyranosyl)-(1 $\rightarrow$ 4)-(2-*O*-(9,12,15,18,21,24,27,30,33,36,39,42,45-tridecaoxa-6-thiaoctatetracont-47-yne-1-yl)- $\beta$ -D-galactopyranosyl)-(1 $\rightarrow$ 4)- $\beta$ -D-glucopyranosyl-(1 $\rightarrow$ 1)-(2*S*,3*R*,4*E*,2'*R*,15'*E*)-2-(2'-hydroxy-15'-tetracosenamido)-4-octadecene-1,3-diol (31)**

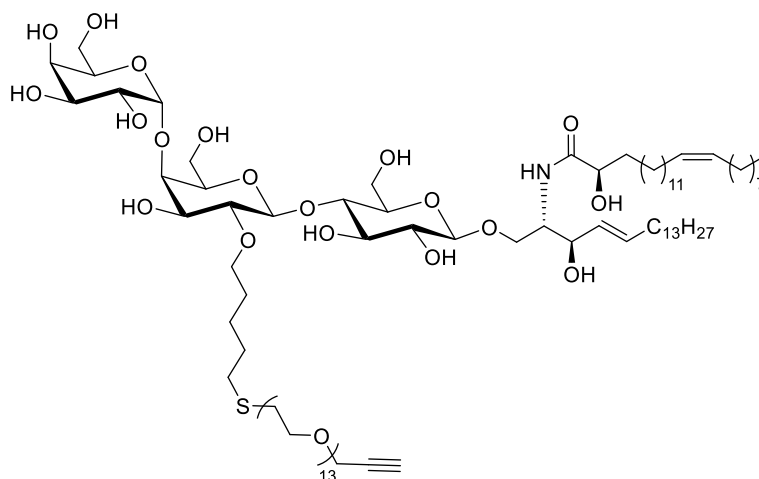

The deprotection of glycolipid **46** (9.15 mg, 3.17  $\mu\text{mol}$ , 1.00 eq.) was performed according to general procedure **GP4** in methanol (1.0 mL) and dichloromethane (0.35 mL) at 50  $^{\circ}\text{C}$  in 24 h. After dialysis (2 d, 5 L  $\text{H}_2\text{O}$ ) and subsequent lyophilization glycolipid **31** (5.90 mg, 3.17  $\mu\text{mol}$ , quant.) was obtained as a colorless powder.

$[\alpha]_{\text{D}}^{22} = +19.5$  (c 0.59,  $\text{CHCl}_3/\text{MeOH}/\text{H}_2\text{O}$ , 1.6:1.0:0.2).

## SUPPORTING INFORMATION

**<sup>1</sup>H-NMR** (600 MHz, CDCl<sub>3</sub>/MeOD/D<sub>2</sub>O, 1.6:1.0:0.2):  $\delta$  (ppm) = 0.76–0.96 (m, 9 H), 1.07–1.47 (m, 58 H), 1.51–1.66 (m, 8 H), 1.67–1.75 (m, 2 H), 1.95–2.08 (m, 7 H), 2.57 (t,  $J$  = 7.3 Hz, 2 H), 2.63 (t,  $J$  = 2.4 Hz, 1 H), 2.72 (t,  $J$  = 6.9 Hz, 2 H), 3.23–3.29 (m<sub>c</sub>, 1 H), 3.28–3.34 (m<sub>c</sub>, 1 H), 3.39 (dt,  $J$  = 10.0, 3.1 Hz, 1 H), 3.52–3.58 (m, 2 H), 3.58–3.82 (m, 40 H), 3.81–3.93 (m, 5 H), 3.95–4.02 (m, 3 H), 4.03 (dd,  $J$  = 7.9, 3.9 Hz, 1 H), 4.06–4.13 (m, 2 H), 4.22 (d,  $J$  = 2.4 Hz, 2 H), 4.27 (dd,  $J$  = 7.0, 5.3 Hz, 1 H), 4.33 (d,  $J$  = 7.9 Hz, 1 H), 4.44 (d,  $J$  = 7.7 Hz, 1 H), 4.93 (d,  $J$  = 3.1 Hz, 1 H), 5.26–5.40 (m<sub>c</sub>, 2 H), 5.43 (dd,  $J$  = 15.3, 7.5 Hz, 1 H), 5.69–5.78 (m<sub>c</sub>, 1 H).

Further signals were covered by signals of the solvent mixture.

**<sup>13</sup>C-NMR** (151 MHz, CDCl<sub>3</sub>/MeOD/D<sub>2</sub>O, 1.6:1.0:0.2):  $\delta$  (ppm) = 14.5, 14.6, 14.6, 23.3, 23.3, 25.8, 25.8, 26.3, 27.8, 27.8, 29.8, 29.8, 29.9, 29.9, 29.9, 29.9, 30.0, 30.1, 30.1, 30.2, 30.2, 30.3, 30.3, 30.3, 30.4, 30.4, 30.5, 30.5, 31.8, 32.5, 32.6, 32.9, 33.1, 35.2, 36.3, 49.6, 53.7, 58.9, 60.4, 61.0, 62.1, 69.2, 69.5, 70.3, 70.7, 70.7, 70.8, 70.9, 70.9, 71.2, 72.0, 72.4, 72.7, 73.7, 74.1, 75.2, 75.6, 75.7, 75.9, 78.8, 79.5, 79.9, 80.5, 101.8, 103.4, 103.8, 129.5, 130.4, 130.5, 130.5, 130.6, 135.4, 176.6.

**IR** (ATR):  $\tilde{\nu}$  (cm<sup>-1</sup>) = 3373, 2919, 2853, 2025, 1972, 1737, 1642, 1537, 1461, 1297, 1083, 1033, 805.

**MS** (ESI):  $m/z$  (%) = 644.1 (30) [M+3Na]<sup>3+</sup>, 954.6 (100) [M+2Na]<sup>2+</sup>, 1886.2 (6) [M+Na]<sup>+</sup>. **HRMS** (ESI):  $m/z$  calculated for: C<sub>94</sub>H<sub>175</sub>NO<sub>32</sub>S [M+Na]<sup>+</sup>: 1886.1744, found: 1886.1756.

**O-( $\alpha$ -D-Galactopyranosyl)-(1 $\rightarrow$ 4)-(2-O-(9,12,15-trioxa-6-thiooctadec-17-yne-1-yl)- $\beta$ -D-galactopyranosyl)-(1 $\rightarrow$ 4)- $\beta$ -D-glucopyranosyl-(1 $\rightarrow$ 1)-(2S,3R,4E,2'R,15'E)-2-(2'-hydroxy-15'-tetracosenamido)-4-octadecene-1,3-diol (32)**

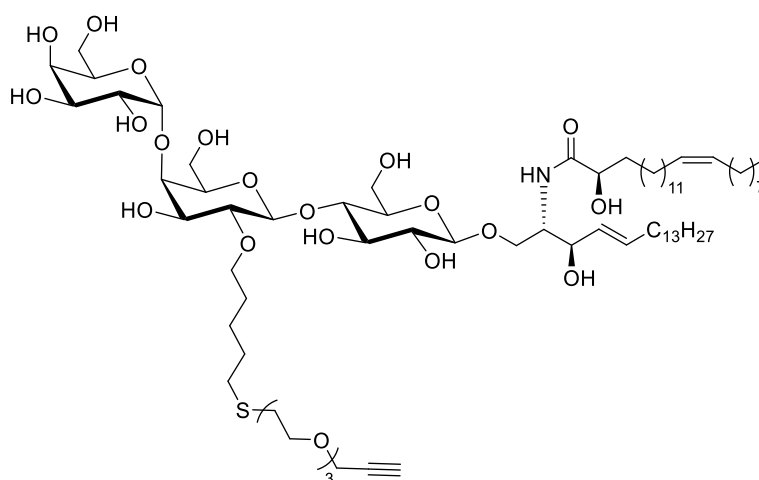

The deprotection of glycolipid **47** (11.6 mg, 4.75  $\mu$ mol, 1.00 eq.) was performed according to general procedure **GP4** in methanol (1.8 mL) and dichloromethane (0.60 mL) in 24 h at 50 °C. After dialysis (2 d, 5 L H<sub>2</sub>O) and subsequent lyophilization the deprotected glycolipid **32** (6.70 mg, 4.71  $\mu$ mol, 99 %) was obtained as a colorless powder.

## SUPPORTING INFORMATION

$[\alpha]_D^{32} = +24.0$  (c 0.73, CHCl<sub>3</sub>/MeOH/H<sub>2</sub>O, 1.6:1.0:0.2).

**<sup>1</sup>H-NMR** (600 MHz, CDCl<sub>3</sub>/MeOD/D<sub>2</sub>O, 1.6:1.0:0.2):  $\delta$  (ppm) = 0.89 (t,  $J = 6.9$  Hz, 6 H), 1.04–1.48 (m, 56 H), 1.50–1.67 (m, 6 H), 1.68–1.77 (m, 2 H), 1.95–2.08 (m, 6 H), 2.57 (t,  $J = 7.3$  Hz, 2 H), 2.63–2.67 (m, 1 H), 2.72 (t,  $J = 6.9$  Hz, 2 H), 3.26 (dd,  $J = 10.0, 7.7$  Hz, 1 H), 3.28–3.34 (m<sub>c</sub>, 1 H), 3.36–3.42 (m, 1 H), 3.52–3.58 (m<sub>c</sub>, 1 H), 3.59–3.76 (m, 16 H), 3.77 (dd,  $J = 9.1, 4.3$  Hz, 1 H), 3.80–3.94 (m, 5 H), 3.95–4.01 (m, 3 H), 4.03 (dd,  $J = 7.9, 3.8$  Hz, 1 H), 4.06–4.12 (m, 2 H), 4.22 (d,  $J = 2.4$  Hz, 2 H), 4.27 (t,  $J = 6.2$  Hz, 1 H), 4.33 (d,  $J = 7.9$  Hz, 1 H), 4.44 (d,  $J = 7.8$  Hz, 1 H), 4.94 (d,  $J = 3.1$  Hz, 1 H), 5.31–5.40 (m, 2 H), 5.43 (dd,  $J = 15.3, 7.6$  Hz, 1 H), 5.68–5.77 (m<sub>c</sub>, 1 H).

Further signals were covered by signals of the solvent mixture.

**<sup>13</sup>C-NMR** (151 MHz, CDCl<sub>3</sub>/MeOD/D<sub>2</sub>O, 1.6:1.0:0.2):  $\delta$  (ppm) = 14.5, 23.3, 23.3, 25.7, 25.8, 27.8, 27.8, 29.8, 29.9, 29.9, 29.9, 30.0, 30.1, 30.1, 30.2, 30.2, 30.3, 30.3, 30.3, 30.4, 30.4, 31.8, 32.5, 32.5, 32.9, 33.0, 35.2, 53.7, 58.9, 60.4, 61.0, 62.1, 64.2, 69.2, 69.5, 69.6, 70.3, 70.3, 70.7, 70.8, 70.8, 71.0, 71.0, 71.3, 72.0, 72.4, 72.7, 73.7, 73.7, 74.1, 75.2, 75.6, 75.7, 75.8, 75.8, 78.7, 79.5, 79.9, 80.5, 101.7, 103.4, 103.8, 129.4, 130.5, 135.4, 176.7.

**IR** (ATR):  $\tilde{\nu}$  (cm<sup>-1</sup>) = 3371, 2920, 2852, 2327, 2116, 1644, 1535, 1461, 1355, 1298, 1254, 1079, 1030, 809.

**MS** (ESI):  $m/z$  (%) = 1444.9 (100) [M+Na]<sup>+</sup>. **HRMS** (ESI):  $m/z$  calculated for: C<sub>74</sub>H<sub>135</sub>O<sub>22</sub>NS [M+Na]<sup>+</sup>: 1444.9089, found: 1444.9092.

**O-( $\alpha$ -D-Galactopyranosyl)-(1 $\rightarrow$ 4)-(2-O-(46-(1-(3-BodipyFL-amidopropyl)-1H-1,2,3-triazol-4-yl)-9,12,15,18,21,24,27,30,33,36,39,42,45-tridecaoxa-6-thiahexatetracontan-1-yl)- $\beta$ -D-galactopyranosyl)-(1 $\rightarrow$ 4)- $\beta$ -D-glucopyranosyl-(1 $\rightarrow$ 1)-(2S,3R,4E)-2-(tetracosanamido)-4-octadecene-1,3-diol (1)**

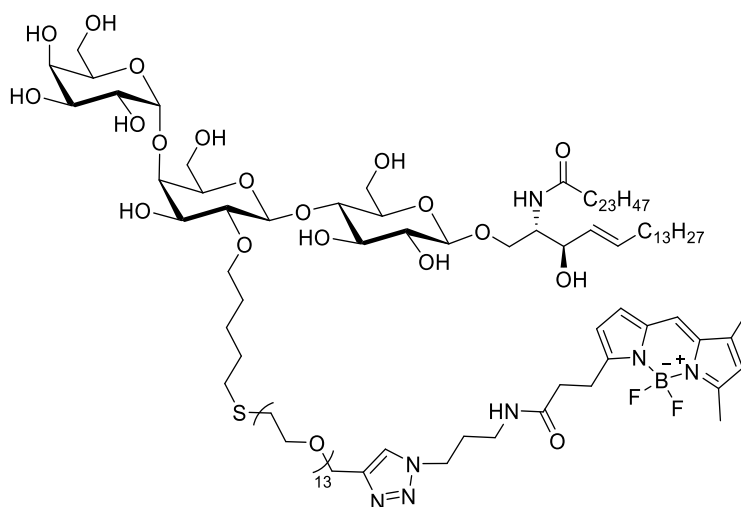

## SUPPORTING INFORMATION

The cycloaddition of glycolipid **25** (7.00 mg, 3.78  $\mu\text{mol}$ , 1.00 eq.) with dye **9** (1.70 mg, 4.54  $\mu\text{mol}$ , 1.20 eq.) was performed according to general procedure **GP5** with copper powder (0.960 mg, 15.1  $\mu\text{mol}$ , 4.00 eq.) and  $\text{CuSO}_4 \cdot 5 \text{H}_2\text{O}$  (0.1 M in  $\text{H}_2\text{O}$ , 7.56  $\mu\text{L}$ , 0.756  $\mu\text{mol}$ , 20 mol%) in water (90.0  $\mu\text{L}$ ) and *tert*-butanol (90.0  $\mu\text{L}$ ). The crude product was washed with *n*-hexane for several times to remove all plasticizers. After a dialysis of 5 d (10 L of  $\text{H}_2\text{O}$ ) and subsequent lyophilization glycolipid **1** (6.00 mg, 2.70  $\mu\text{mol}$ , 71 %) was isolated as a red powder.

$[\alpha]_{\text{D}}^{23} = +23.8$  (c 0.60,  $\text{CHCl}_3/\text{MeOH}/\text{H}_2\text{O}$ , 1.6:1.0:0.2).

**$^1\text{H-NMR}$**  (600 MHz,  $\text{CDCl}_3/\text{MeOD}/\text{D}_2\text{O}$ , 1.6:1.0:0.2):  $\delta$  (ppm) = 0.73–0.97 (m, 8 H), 1.05–1.47 (m, 58 H), 1.50–1.65 (m, 8 H), 1.68–1.88 (m, 4 H), 1.97–2.05 (m, 3 H), 2.05–2.11 (mc, 2 H), 2.14–2.20 (mc, 2 H), 2.19–2.24 (m, 1 H), 2.29 (s, 3 H), 2.56 (s, 3 H), 2.54–2.59 (m, 1 H), 2.65 (t,  $J = 7.7$  Hz, 2 H), 2.69–2.75 (mc, 2 H), 2.79–2.86 (m, 1 H), 2.92–2.98 (m, 1 H), 3.03–3.11 (m, 1 H), 3.21 (t,  $J = 6.5$  Hz, 2 H), 3.23–3.30 (m, 3 H), 3.35–3.43 (m, 2 H), 3.49–3.87 (m, 52 H), 3.95–4.01 (m, 3 H), 4.05–4.10 (m, 2 H), 4.16–4.23 (m, 2 H), 4.24–4.30 (m, 1 H), 4.94 (s, 1 H), 5.40–5.49 (mc, 1 H), 5.66–5.75 (mc, 1 H), 6.18 (s, 1 H), 6.33 (d,  $J = 4.0$  Hz, 1 H), 6.95 (d,  $J = 4.0$  Hz, 1 H), 7.21 (s, 1 H), 7.87 (s, 1 H).

Further signals were covered by signals of the solvent mixture.

**$^{13}\text{C-NMR}$**  (151 MHz,  $\text{CDCl}_3/\text{MeOD}/\text{D}_2\text{O}$ , 1.6:1.0:0.2):  $\delta$  (ppm) = 11.7, 14.6, 15.3, 23.3, 25.3, 25.7, 26.6, 27.8, 29.9, 29.9, 30.0, 30.0, 30.1, 30.2, 30.3, 30.3, 30.4, 30.4, 31.8, 35.8, 36.8, 37.1, 52.5, 53.7, 61.0, 62.0, 62.1, 64.2, 64.7, 69.4, 69.5, 70.1, 70.3, 70.7, 70.8, 71.0, 71.2, 72.0, 72.4, 73.7, 73.8, 74.1, 75.2, 75.6, 75.8, 78.8, 79.5, 80.5, 101.8, 103.4, 103.8, 117.5, 121.3, 124.8, 129.0, 129.8, 134.0, 135.3, 135.9, 145.2, 157.5, 161.2, 174.1, 175.3.

**$^{19}\text{F-NMR}$**  (471 MHz,  $\text{CDCl}_3/\text{MeOD}/\text{D}_2\text{O}$ , 1.6:1.0:0.2):  $\delta$  (ppm) =  $-143.1$  (q,  $J = 32.9$  Hz).

**IR** (ATR):  $\tilde{\nu}$  ( $\text{cm}^{-1}$ ) = 3306, 2920, 2852, 2160, 1734, 1647, 1605, 1462, 1450, 1251, 1080, 1031, 803.

**MS** (ESI):  $m/z$  (%) = 1134.7 (100)  $[\text{M}+2\text{Na}]^{2+}$ , 2246.4 (5)  $[\text{M}+\text{Na}]^+$ . **HRMS** (ESI):  $m/z$  calculated for:  $\text{C}_{111}\text{H}_{198}\text{O}_{32}\text{SBF}_2\text{N}_7$   $[\text{M}+\text{Na}]^+$ : 2246.3789, found: 2246.3776.

## SUPPORTING INFORMATION

**O-( $\alpha$ -D-Galactopyranosyl)-(1 $\rightarrow$ 4)-(2-O-(16-(1-(3-BodipyFL-amidopropyl)-1H-1,2,3-triazol-4-yl)-9,12,15-trioxa-6-thiahexadecan-1-yl)- $\beta$ -D-galactopyranosyl)-(1 $\rightarrow$ 4)- $\beta$ -D-glucopyranosyl-(1 $\rightarrow$ 1)-(2S,3R,4E)-2-(tetracosanamido)-4-octadecene-1,3-diol (2)**

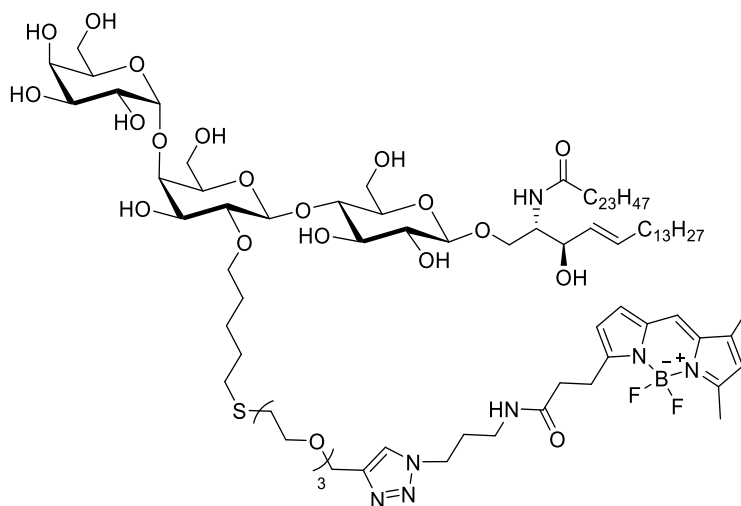

The cycloaddition of glycolipid **26** (8.20 mg, 5.82  $\mu$ mol, 1.00 eq.) with dye **9** (2.61 mg, 6.98  $\mu$ mol, 1.20 eq.) was performed according to general procedure **GP5** using copper powder (1.48 mg, 23.3  $\mu$ mol, 4.00 eq.) and CuSO<sub>4</sub>·5 H<sub>2</sub>O (0.1 M in H<sub>2</sub>O, 11.6  $\mu$ L, 1.16  $\mu$ mol, 20 mol%) in water (140  $\mu$ L) and *tert*-butanol (140  $\mu$ L). The dialysis (5 d, 12.5 L H<sub>2</sub>O) and the subsequent lyophilization were carried out twice to remove all traces of unreacted dye. Glycolipid **2** (5.60 mg, 3.14  $\mu$ mol, 54 %) was isolated as a red powder.

$[\alpha]_D^{23} = +99.4$  (c 0.90, CHCl<sub>3</sub>/MeOH/H<sub>2</sub>O, 1.6:1.0:0.2).

**<sup>1</sup>H-NMR** (500 MHz, CDCl<sub>3</sub>/MeOD/D<sub>2</sub>O, 1.6:1.0:0.2):  $\delta$  (ppm) = 0.78–0.95 (m, 8 H), 1.06–1.48 (m, 64 H), 1.50–1.66 (m, 6 H), 1.97–2.05 (m, 3 H), 2.08 (t,  $J = 6.7$  Hz, 2 H), 2.13–2.20 (m<sub>c</sub>, 2 H), 2.29 (s, 3 H), 2.55 (s, 3 H), 2.59–2.68 (m, 3 H), 2.71–2.85 (m, 2 H), 3.15–3.29 (m, 4 H), 3.34–3.42 (m, 1 H), 3.51–3.76 (m, 16 H), 3.78–3.92 (m, 6 H), 3.94–4.00 (m, 3 H), 4.04–4.11 (m<sub>c</sub>, 1 H), 4.20 (dd,  $J = 9.9, 3.9$  Hz, 1 H), 4.23–4.28 (m, 1 H), 4.89–4.98 (m<sub>c</sub>, 1 H), 5.44 (dd,  $J = 15.3, 7.7$  Hz, 1 H), 5.65–5.75 (m<sub>c</sub>, 1 H), 6.18 (s, 1 H), 6.33 (d,  $J = 4.1$  Hz, 1 H), 6.95 (d,  $J = 4.1$  Hz, 1 H), 7.22 (s, 1 H), 7.92 (s, 1 H).

**<sup>13</sup>C-NMR** (126 MHz, CDCl<sub>3</sub>/MeOD/D<sub>2</sub>O, 1.6:1.0:0.2):  $\delta$  (ppm) = 11.6, 14.5, 15.2, 23.2, 25.2, 25.7, 26.6, 27.7, 29.0, 29.9, 29.9, 30.0, 30.0, 30.2, 30.2, 30.2, 30.3, 30.3, 32.5, 32.5, 33.0, 35.7, 35.9, 36.8, 37.0, 37.3, 53.7, 60.4, 61.0, 62.1, 69.3, 69.5, 70.2, 70.2, 70.7, 70.9, 70.9, 72.1, 72.3, 73.6, 73.8, 74.0, 75.2, 75.5, 75.8, 78.9, 79.6, 80.5, 101.8, 103.4, 103.8, 117.5, 121.2, 124.8, 129.0, 129.8, 135.3, 135.9, 145.2, 157.4, 161.2, 174.1, 175.3.

**<sup>19</sup>F-NMR** (471 MHz, CDCl<sub>3</sub>/MeOD/D<sub>2</sub>O, 1.6:1.0:0.2):  $\delta$  (ppm) = –143.1 (m).

**IR** (ATR):  $\tilde{\nu}$  (cm<sup>-1</sup>) = 3395, 2920, 2852, 2162, 2030, 1734, 1646, 1606, 1534, 1372, 1250, 1056, 803.

## SUPPORTING INFORMATION

**MS** (ESI):  $m/z$  (%) = 914.1 (100)  $[M+2Na]^{2+}$ , 1805.1 (31)  $[M+Na]^+$ . **HRMS** (ESI):  $m/z$  calculated for:  $C_{91}H_{158}BF_2O_{22}N_7S$   $[M+Na]^+$ : 1805.1148, found: 1805.1145.

**O-( $\alpha$ -D-galactopyranosyl)-(1 $\rightarrow$ 4)-(2-O-(46-(1-(3-BodipyFL-amidopropyl)-1H-1,2,3-triazol-4-yl)-9,12,15,18,21,24,27,30,33,36,39,42,45-tridecaoxa-6-thiahexatetracontan-1-yl)- $\beta$ -D-galactopyranosyl)-(1 $\rightarrow$ 4)- $\beta$ -D-glucopyranosyl-(1 $\rightarrow$ 1)-(2S,3R,4E,2'R)-2-(2'-hydroxy-tetracosanamido)-4-octadecene-1,3-diol (3)**

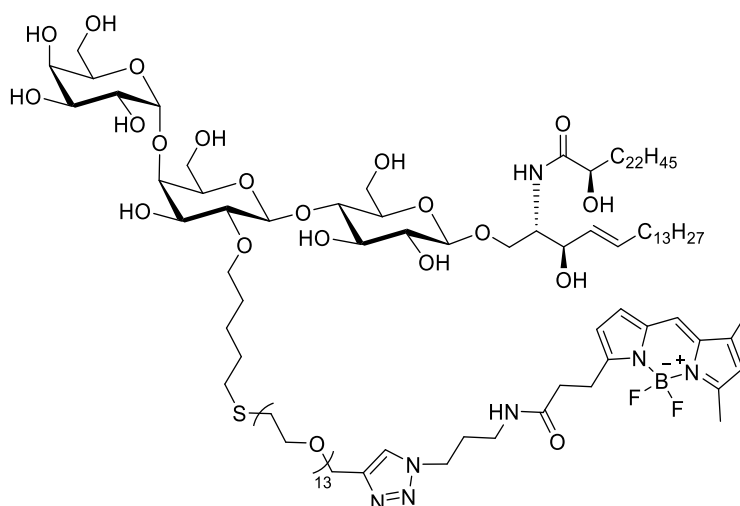

The cycloaddition of glycolipid **27** (7.00 mg, 3.75  $\mu$ mol, 1.00 eq.) with dye **9** (1.62 mg, 4.32  $\mu$ mol, 1.15 eq.) was performed according to **GP5** using copper powder (0.953 mg, 15.0  $\mu$ mol, 4.00 eq.) and  $CuSO_4 \cdot 5 H_2O$  (0.1 M in  $H_2O$ , 7.50  $\mu$ L, 0.750  $\mu$ mol, 20 mol%) in water (90.0  $\mu$ L) and *tert*-butanol (90.0  $\mu$ L). The dialysis (5 d, 12.5 L  $H_2O$ ) and the subsequent lyophilization were carried out twice to remove all traces of unreacted dye. Glycolipid **3** (6.70 mg, 2.99  $\mu$ mol, 80 %) was isolated as a red powder.

$[\alpha]_D^{26} = +25.4$  ( $c$  0.60,  $CHCl_3/MeOH/H_2O$ , 1.6:1.0:0.2).

**$^1H$ -NMR** (600 MHz,  $CDCl_3/MeOD/D_2O$ , 1.6:1.0:0.2):  $\delta$  (ppm) = 0.73–0.84 (m, 14 H), 1.09–1.34 (m, 72 H), 1.47–1.56 (m, 6 H), 1.90–1.95 (m, 3 H), 1.95–2.02 (m, 2 H), 2.09–2.14 (m, 1 H), 2.19 (s, 3 H), 2.46 (s, 3 H), 2.55 (t,  $J = 7.6$  Hz, 2 H), 2.62 (t,  $J = 6.9$  Hz, 2 H), 2.70–2.77 (m, 1 H), 2.81–2.88 (m, 1 H), 2.93–3.01 (m, 1 H), 3.09–3.14 ( $m_c$ , 2 H), 3.13–3.19 ( $m_c$ , 2 H), 3.21 (dd,  $J = 9.4, 7.9$  Hz, 1 H), 3.42–3.76 (m, 42 H), 3.79–3.92 (m, 3 H), 3.93 (dd,  $J = 8.0, 3.7$  Hz, 1 H), 3.95–4.03 (m, 2 H), 4.17 (t,  $J = 6.2$  Hz, 1 H), 4.21–4.25 (m, 1 H), 4.25 (d,  $J = 7.3$  Hz, 1 H), 4.34 (d,  $J = 7.9$  Hz, 1 H), 4.83 (d,  $J = 2.9$  Hz, 1 H), 5.24–5.27 (m, 1H), 5.33 (dd,  $J = 15.3, 7.5$  Hz, 1 H), 5.56–5.67 (m, 1 H), 6.09 (s, 1 H), 6.24 (d,  $J = 4.0$  Hz, 1 H), 6.86 (d,  $J = 4.0$  Hz, 1 H), 7.12 (s, 1 H), 7.75 (s, 1 H).

Further signals were covered by signals of the solvent mixture.

**$^{13}C$ -NMR** (151 MHz,  $CDCl_3/MeOD/D_2O$ , 1.6:1.0:0.2):  $\delta$  (ppm) = 11.7, 14.5, 15.3, 23.3, 25.3, 25.3, 25.8, 26.3, 27.8, 29.8, 29.9, 29.9, 29.9, 30.0, 30.1, 30.1, 30.2, 30.2, 30.3, 30.3, 30.4, 31.8,





## SUPPORTING INFORMATION

1 H), 4.05–4.13 (m, 2 H), 4.22–4.30 (m<sub>c</sub>, 1 H), 4.93 (d, *J* = 2.6 Hz, 1 H), 5.43 (dd, *J* = 15.6, 7.7 Hz, 1 H), 5.68–5.77 (m<sub>c</sub>, 1 H), 6.18 (s, 1 H), 6.33 (d, *J* = 4.0 Hz, 1 H), 6.95 (d, *J* = 4.0 Hz, 1 H), 7.22 (s, 1 H), 7.85 (s, 1 H).

Further signals were covered by signals of the solvent mixture.

**<sup>13</sup>C-NMR** (151 MHz, CDCl<sub>3</sub>/MeOD/D<sub>2</sub>O, 1.6:1.0:0.2): δ (ppm) = 14.6, 15.3, 23.3, 25.3, 25.8, 25.8, 29.8, 30.0, 30.0, 30.1, 30.2, 30.3, 30.3, 30.4, 30.4, 30.5, 31.8, 32.6, 32.6, 32.9, 33.1, 35.3, 35.8, 36.9, 53.7, 60.5, 61.0, 62.1, 64.7, 69.2, 69.6, 70.2, 70.3, 70.7, 70.9, 71.0, 71.3, 72.1, 72.4, 72.7, 73.7, 74.1, 75.2, 75.7, 75.9, 78.8, 79.5, 80.6, 101.8, 103.4, 103.8, 117.5, 121.3, 124.9, 129.1, 129.5, 134.0, 135.5, 136.0, 145.3, 157.5, 161.2, 174.2, 176.7.

**<sup>19</sup>F-NMR** (471 MHz, CDCl<sub>3</sub>/MeOD/D<sub>2</sub>O, 1.6:1.0:0.2): δ (ppm) = -143.1 (q, *J* = 33.1 Hz).

**IR** (ATR):  $\tilde{\nu}$  (cm<sup>-1</sup>) = 3351, 2919, 2851, 2160, 2028, 1735, 1647, 1605, 1537, 1464, 1367, 1253, 1078, 1031, 802.

**MS** (ESI): *m/z* (%) = 922.0 (100) [M+2Na]<sup>2+</sup>, 1821.1 (29) [M+Na]<sup>+</sup>. **HRMS** (ESI): *m/z* calculated for: C<sub>91</sub>H<sub>158</sub>O<sub>23</sub>BF<sub>2</sub>N<sub>7</sub>S [M+Na]<sup>+</sup>: 1821.1096, found: 1821.1083.

**O-(α-D-Galactopyranosyl)-(1→4)-(2-O-(46-(1-(3-BodipyFL-amidopropyl)-1H-1,2,3-triazol-4-yl)-9,12,15,18,21,24,27,30,33,36,39,42,45-tridecaoxa-6-thiahexatetracontan-1-yl)-β-D-galactopyranosyl)-(1→4)-β-D-glucopyranosyl-(1→1)-(2S,3R,4E,15'Z)-2-(15'-tetracosenamido)-4-octadecene-1,3-diol (5)**

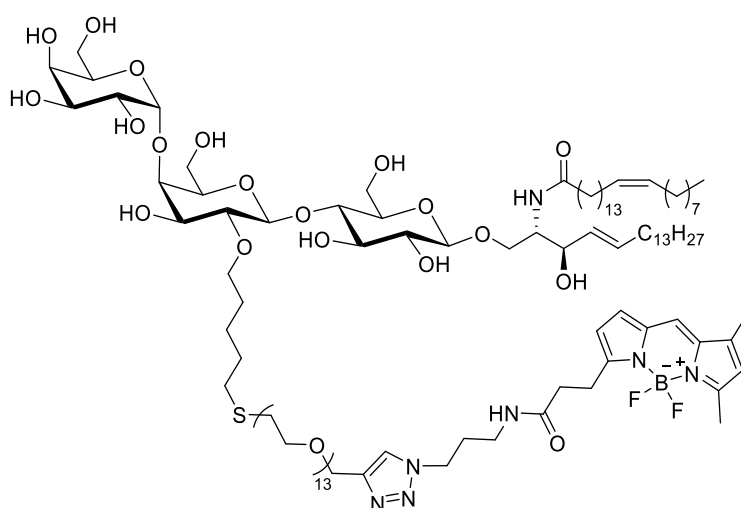

The cycloaddition of glycolipid **29** (7.70 mg, 4.17 μmol, 1.00 eq.) with dye **9** (1.87 mg, 5.00 μmol, 1.20 eq.) was performed according to general procedure **GP5** using copper powder (1.06 mg, 16.7 μmol, 4.00 eq.) and CuSO<sub>4</sub>·5 H<sub>2</sub>O (0.1 M in H<sub>2</sub>O, 8.34 μL, 0.834 μmol, 20 mol%) in water (100 μL) and *tert*-butanol (100 μL). The dialysis (2 d, 5 L of H<sub>2</sub>O and 5 d, 12.5 L of H<sub>2</sub>O) and the subsequent lyophilization were carried out twice to remove all traces of unreacted dye. Glycolipid **5** (7.60 mg, 3.42 μmol, 82 %) was isolated as a red powder.

## SUPPORTING INFORMATION

$[\alpha]_D^{23} = +20.6$  (c 0.82, CHCl<sub>3</sub>/MeOH/H<sub>2</sub>O, 1.6:1.0:0.2).

**<sup>1</sup>H-NMR** (600 MHz, CDCl<sub>3</sub>/MeOD/D<sub>2</sub>O, 1.6:1.0:0.2):  $\delta$  (ppm) = 0.78–0.95 (m, 9 H), 1.09–1.47 (m, 55 H), 1.50–1.68 (m, 8 H), 1.73–1.89 (m, 3 H), 1.99–2.06 (m, 7 H), 2.06–2.12 (m, 2 H), 2.14–2.20 (m, 2 H), 2.29 (s, 3 H), 2.56 (s, 3 H), 2.52–2.60 (m, 1 H), 2.62–2.68 (m<sub>c</sub>, 2 H), 2.70–2.75 (m<sub>c</sub>, 2 H), 2.80–2.86 (m, 1 H), 2.91–2.97 (m, 1 H), 3.04–3.11 (m, 1 H), 3.18–3.30 (m, 5 H), 3.36–3.43 (m, 2 H), 3.41–3.92 (m, 50 H), 3.96–4.01 (m, 3 H), 4.04–4.11 (m<sub>c</sub>, 2 H), 4.22 (dd,  $J = 9.8, 3.9$  Hz, 1 H), 4.24–4.29 (m, 1 H), 4.32 (d,  $J = 7.8$  Hz, 1 H), 4.33–4.39 (m, 1 H), 4.95 (d,  $J = 3.0$  Hz, 1 H), 5.31–5.40 (m, 2 H), 5.44 (dd,  $J = 15.3, 7.8$  Hz, 1 H), 5.64–5.77 (m<sub>c</sub>, 1 H), 6.19 (s, 1 H), 6.34 (d,  $J = 4.0$  Hz, 1 H), 6.96 (d,  $J = 4.0$  Hz, 1 H), 7.24 (s, 1 H), 7.99 (s, 1 H).

Further signals were covered by signals of the solvent mixture.

**<sup>13</sup>C-NMR** (151 MHz, CDCl<sub>3</sub>/MeOD/D<sub>2</sub>O, 1.6:1.0:0.2):  $\delta$  (ppm) = 15.2, 18.1, 18.8, 26.8, 28.8, 29.3, 30.2, 31.3, 33.4, 33.5, 33.5, 33.6, 33.7, 33.7, 33.7, 33.8, 33.8, 33.9, 34.0, 35.4, 36.1, 36.1, 36.4, 36.6, 39.3, 40.4, 40.6, 57.3, 60.8, 64.0, 64.5, 65.2, 65.8, 67.8, 68.4, 72.9, 73.2, 73.8, 73.9, 74.3, 74.4, 74.8, 75.7, 75.9, 76.7, 77.3, 77.5, 77.6, 78.8, 79.1, 79.4, 82.6, 83.3, 84.1, 105.5, 107.0, 107.5, 121.0, 124.8, 128.4, 132.6, 133.5, 134.1, 137.6, 138.8, 139.5, 148.8, 161.1, 164.7, 177.7, 178.9.

**<sup>19</sup>F-NMR** (471 MHz, CDCl<sub>3</sub>/MeOD/D<sub>2</sub>O, 1.6:1.0:0.2):  $\delta$  (ppm) = -143.1 (q,  $J = 32.9$  Hz).

**IR** (ATR):  $\tilde{\nu}$  (cm<sup>-1</sup>) = 3356, 2921, 2853, 2160, 2029, 1975, 1727, 1648, 1605, 1535, 1411, 1251, 1081, 1033, 804.

**MS** (ESI):  $m/z$  (%) = 1133.2 (100) [M+2Na]<sup>2+</sup>, 2243.4 (6) [M+Na]<sup>+</sup>. **HRMS** (ESI):  $m/z$  calculated for: C<sub>111</sub>H<sub>196</sub>O<sub>32</sub>SBF<sub>2</sub>N<sub>7</sub> [M+Na]<sup>+</sup>: 2243.3616, found: 2243.3612.

**O-( $\alpha$ -D-Galactopyranosyl)-(1 $\rightarrow$ 4)-(2-O-(16-(1-(3-BodipyFL-amidopropyl)-1H-1,2,3-triazol-4-yl)-9,12,15-trioxa-6-thiahexadecan-1-yl)- $\beta$ -D-galactopyranosyl)-(1 $\rightarrow$ 4)- $\beta$ -D-glucopyranosyl-(1 $\rightarrow$ 1)-(2S,3R,4E,15'Z)-2-(15'-tetracosenamido)-4-octadecene-1,3-diol (6)**

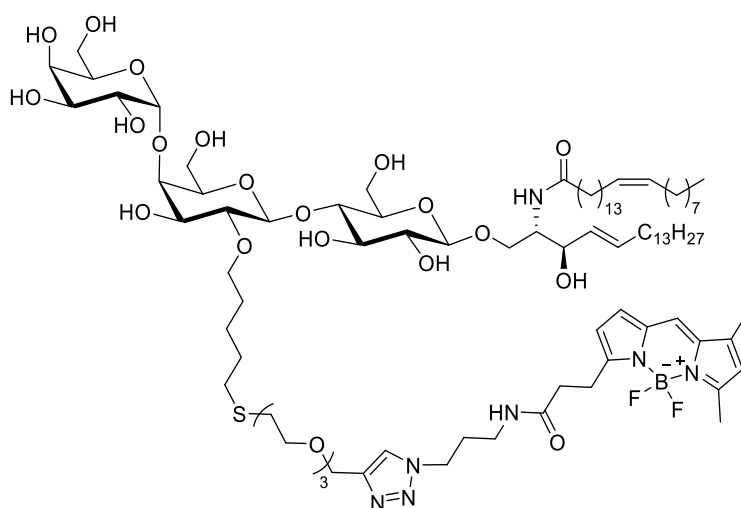

## SUPPORTING INFORMATION

The cycloaddition of glycolipid **30** (10.6 mg, 7.53  $\mu\text{mol}$ , 1.00 eq.) with dye **9** (3.10 mg, 8.28  $\mu\text{mol}$ , 1.10 eq.) was performed according to general procedure **GP5** using copper powder (1.91 mg, 30.1  $\mu\text{mol}$ , 4.00 eq.) and  $\text{CuSO}_4 \cdot 5 \text{H}_2\text{O}$  (0.1 M in  $\text{H}_2\text{O}$ , 15.1  $\mu\text{L}$ , 1.51  $\mu\text{mol}$ , 20 mol%) in water (180  $\mu\text{L}$ ) and *tert*-butanol (180  $\mu\text{L}$ ). The dialysis (5 d, 12.5 L  $\text{H}_2\text{O}$ ) and the subsequent lyophilization were carried out twice to remove all traces of unreacted dye. Glycolipid **6** (7.50 mg, 4.21  $\mu\text{mol}$ , 56 %) was isolated as a red powder.

$[\alpha]_{\text{D}}^{27} = +29.4$  (c 0.60,  $\text{CHCl}_3/\text{MeOH}/\text{H}_2\text{O}$ , 1.6:1.0:0.2).

**$^1\text{H-NMR}$**  (600 MHz,  $\text{CDCl}_3/\text{MeOD}/\text{D}_2\text{O}$ , 1.6:1.0:0.2):  $\delta$  (ppm) = 0.78–0.98 (m, 9 H), 1.11–1.47 (m, 54 H), 1.49–1.67 (m, 7 H), 2.05–2.11 (m, 6 H), 2.05–2.11 (m<sub>c</sub>, 2 H), 2.14–2.20 (m<sub>c</sub>, 2 H), 2.29 (s, 3 H), 2.55 (s, 3 H), 2.56–2.62 (m<sub>c</sub>, 2 H), 2.65 (t,  $J = 7.6$  Hz, 2 H), 2.74 (t,  $J = 6.7$  Hz, 2 H), 3.18–3.29 (m, 4 H), 3.39 (td,  $J = 5.5, 2.8$  Hz, 1 H), 3.52–3.59 (m, 2 H), 3.59–3.79 (m, 14 H), 3.78–3.92 (m, 6 H), 3.94–4.01 (m, 3 H), 4.03–4.10 (m<sub>c</sub>, 1 H), 4.20 (dd,  $J = 10.0, 4.0$  Hz, 1 H), 4.27 (t,  $J = 6.1$  Hz, 1 H), 4.93 (d,  $J = 2.8$  Hz, 1 H), 5.30–5.40 (m<sub>c</sub>, 2 H), 5.44 (dd,  $J = 15.3, 7.8$  Hz, 1 H), 5.66–5.74 (m<sub>c</sub>, 1 H), 6.19 (s, 1 H), 6.34 (d,  $J = 4.0$  Hz, 1 H), 6.96 (d,  $J = 4.0$  Hz, 1 H), 7.22 (s, 1 H), 7.89 (s, 1 H).

Further signals were covered by signals of the solvent mixture.

**$^{13}\text{C-NMR}$**  (151 MHz,  $\text{CDCl}_3/\text{MeOD}/\text{D}_2\text{O}$ , 1.6:1.0:0.2):  $\delta$  (ppm) = 11.7, 14.6, 15.3, 23.3, 23.3, 25.3, 25.7, 26.7, 27.8, 27.8, 29.9, 29.9, 30.0, 30.1, 30.2, 30.3, 30.3, 30.3, 30.3, 30.3, 30.4, 30.4, 32.5, 32.6, 33.1, 35.8, 36.8, 37.1, 53.8, 60.4, 61.0, 62.1, 64.6, 69.4, 69.6, 70.2, 70.3, 70.7, 70.9, 70.9, 71.0, 72.1, 72.4, 73.7, 73.9, 74.1, 75.2, 75.6, 75.8, 78.9, 79.6, 80.5, 101.8, 103.4, 103.8, 117.5, 121.3, 124.8, 129.0, 129.9, 130.5, 134.0, 135.4, 136.0, 145.3, 157.5, 161.2, 174.2, 175.3.

**$^{19}\text{F-NMR}$**  (471 MHz,  $\text{CDCl}_3/\text{MeOD}/\text{D}_2\text{O}$ , 1.6:1.0:0.2):  $\delta$  (ppm) =  $-143.1$  (q,  $J = 32.9$  Hz).

**IR** (ATR):  $\tilde{\nu}$  ( $\text{cm}^{-1}$ ) = 3358, 3340, 2920, 2852, 2160, 2029, 1976, 1738, 1646, 1606, 1540, 1462, 1363, 1250, 1078, 1054, 803.

**MS** (ESI):  $m/z$  (%) = 913.0 (100)  $[\text{M}+2\text{Na}]^{2+}$ , 1803.1 (22)  $[\text{M}+\text{Na}]^+$ . **HRMS** (ESI):  $m/z$  calculated for:  $\text{C}_{91}\text{H}_{156}\text{O}_{22}\text{BF}_2\text{N}_7\text{S}$   $[\text{M}+\text{Na}]^+$ : 1803.0992, found: 1803.0999.

## SUPPORTING INFORMATION

**O-( $\alpha$ -D-Galactopyranosyl)-(1 $\rightarrow$ 4)-(2-O-(46-(1-(3-BodipyFL-amidopropyl)-1H-1,2,3-triazol-4-yl)-9,12,15,18,21,24,27,30,33,36,39,42,45-tridecaoxa-6-thiahexatetracontan-1-yl)- $\beta$ -D-galactopyranosyl)-(1 $\rightarrow$ 4)- $\beta$ -D-glucopyranosyl-(1 $\rightarrow$ 1)-(2S,3R,4E,2'R,15'E)-2-(2'-hydroxy-15'-tetracosenamido)-4-octadecene-1,3-diol (7)**

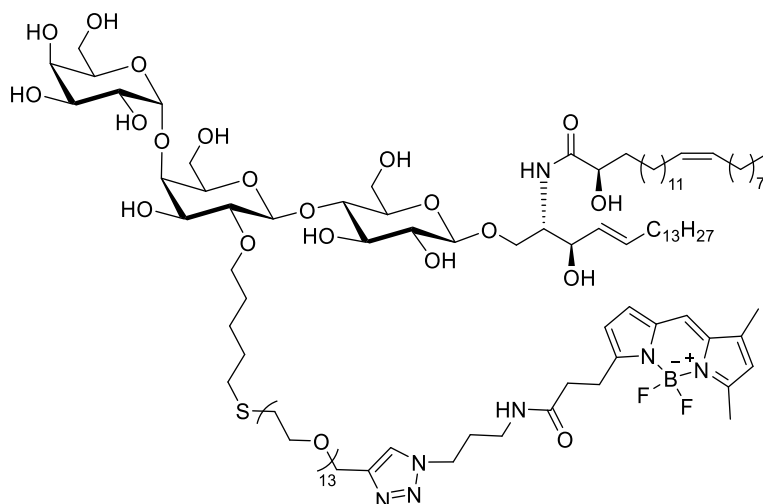

The cycloaddition of glycolipid **31** (5.90 mg, 3.17  $\mu$ mol, 1.00 eq.) with dye **9** (1.42 mg, 3.80  $\mu$ mol, 1.20 eq.) was performed according to general procedure **GP5** with copper powder (0.806 mg, 12.7  $\mu$ mol, 4.00 eq.) and  $\text{CuSO}_4 \cdot 5 \text{H}_2\text{O}$  (0.1 M in  $\text{H}_2\text{O}$ , 6.34  $\mu\text{L}$ , 0.634  $\mu$ mol, 20.0 mol%) in water (80.0  $\mu\text{L}$ ) and *tert*-butanol (80.0  $\mu\text{L}$ ). The dialysis (5 d, 12.5 L  $\text{H}_2\text{O}$ ) and the subsequent lyophilization were carried out twice to remove all traces of unreacted dye. Glycolipid **7** (6.60 mg, 2.95  $\mu$ mol, 93 %) was isolated as a red powder.

$[\alpha]_{\text{D}}^{23} = +30.6$  (c 0.66,  $\text{CHCl}_3/\text{MeOH}/\text{H}_2\text{O}$ , 1.6:1.0:0.2).

**$^1\text{H-NMR}$**  (500 MHz,  $\text{CDCl}_3/\text{MeOD}/\text{D}_2\text{O}$ , 1.6:1.0:0.2):  $\delta$  (ppm) = 0.73–1.02 (m, 12 H), 1.22–1.35 (m, 64 H), 1.55–1.66 (m, 6 H), 1.91–2.11 (m, 8 H), 2.14–2.19 (m, 1 H), 2.21 (t,  $J = 7.7$  Hz, 1 H), 2.29 (s, 3 H), 2.56 (s, 3 H), 2.56–2.60 (m, 1 H), 2.65 (t,  $J = 7.6$  Hz, 2 H), 2.72 (t,  $J = 6.9$  Hz, 2 H), 2.79–2.87 (m, 1 H), 2.90–2.99 (m, 1 H), 3.01–3.11 (m, 1 H), 3.18–3.29 (m, 4 H), 3.48–3.92 (m, 50 H), 3.94–4.07 (m, 4 H), 4.04–4.14 (m, 2 H), 4.93 (s, 1 H), 5.25–5.38 (m, 2 H), 5.37–5.49 (m, 1 H), 5.67–5.78 (m, 1 H), 6.19 (s, 1 H), 6.33 (d,  $J = 4.1$  Hz, 1 H), 6.95 (d,  $J = 4.1$  Hz, 1 H), 7.22 (s, 1 H), 7.86 (s, 1 H).

Further signals were covered by signals of the solvent mixture.

**$^{13}\text{C-NMR}$**  (126 MHz,  $\text{CDCl}_3/\text{MeOD}/\text{D}_2\text{O}$ , 1.6:1.0:0.2):  $\delta$  (ppm) = 11.7, 14.5, 15.3, 23.2, 25.2, 25.7, 25.8, 26.3, 27.8, 29.8, 29.9, 30.0, 30.1, 30.1, 30.2, 30.3, 30.4, 30.4, 31.8, 32.5, 32.5, 32.9, 33.0, 35.2, 35.8, 36.3, 36.8, 52.5, 53.7, 60.5, 61.0, 62.2, 64.6, 69.2, 69.6, 70.1, 70.3, 70.6, 70.8, 71.2, 72.1, 72.3, 72.3, 72.7, 73.7, 74.0, 75.2, 75.6, 75.8, 78.8, 79.3, 79.5, 80.5, 101.8, 103.4, 103.8, 117.5, 121.3, 124.8, 129.0, 129.5, 130.3, 130.4, 130.5, 130.6, 134.0, 135.4, 135.9, 145.2, 157.5, 161.2, 174.1, 176.6.

**$^{19}\text{F-NMR}$**  (471 MHz,  $\text{CDCl}_3/\text{MeOD}/\text{D}_2\text{O}$ , 1.6:1.0:0.2):  $\delta$  (ppm) = -143.1 (q,  $J = 33.1$  Hz).

## SUPPORTING INFORMATION

**IR** (ATR):  $\tilde{\nu}$  (cm<sup>-1</sup>) = 3317, 2921, 2853, 2161, 2026, 1975, 1727, 1629, 1606, 1459, 1255, 1074, 801, 666.

**MS** (ESI):  $m/z$  (%) = 768.8 (26) [M+3Na]<sup>3+</sup>, 1141.7 (100) [M+2Na]<sup>2+</sup>, 2260.4 (3) [M+Na]<sup>+</sup>. **HRMS** (ESI):  $m/z$  calculated for: C<sub>111</sub>H<sub>196</sub>BF<sub>2</sub>N<sub>7</sub>O<sub>33</sub>S [M+Na]<sup>+</sup>: 2260.3582, found: 2260.3580.

**O-( $\alpha$ -D-Galactopyranosyl)-(1 $\rightarrow$ 4)-(2-O-(16-(1-(3-BodipyFL-amidopropyl)-1H-1,2,3-triazol-4-yl)-9,12,15-trioxa-6-thiahexadecan-1-yl)- $\beta$ -D-galactopyranosyl)-(1 $\rightarrow$ 4)- $\beta$ -D-glucopyranosyl-(1 $\rightarrow$ 1)-(2S,3R,4E,2'R,15'E)-2-(2'-hydroxy-15'-tetracosenamido)-4-octadecene-1,3-diol (8)**

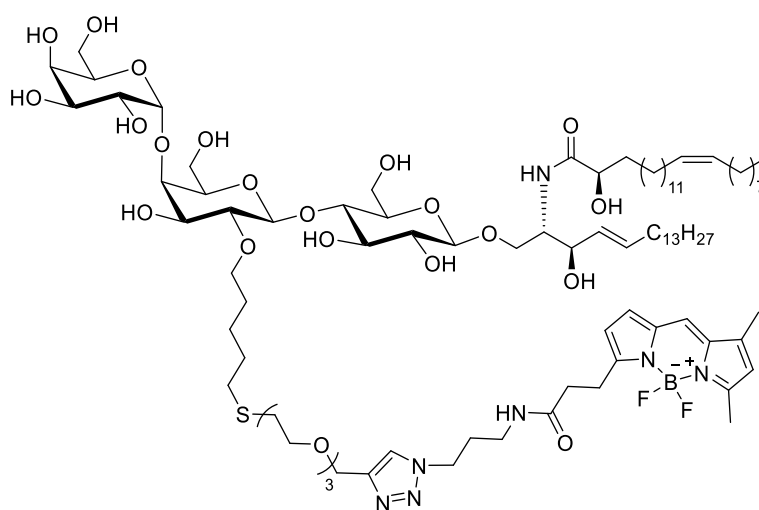

The cycloaddition of glycolipid **32** (8.30 mg, 5.83  $\mu$ mol, 1.00 eq.) with dye **9** (2.62 mg, 7.00  $\mu$ mol, 1.20 eq.) was performed according to general procedure **GP5** using copper powder (1.48 mg, 23.3  $\mu$ mol, 4.00 eq.) and CuSO<sub>4</sub>·5 H<sub>2</sub>O (0.1 M in H<sub>2</sub>O, 11.7  $\mu$ L, 1.17  $\mu$ mol, 20 mol%) in water (140  $\mu$ L) and *tert*-butanol (140  $\mu$ L). The dialysis (5 d, 12.5 L H<sub>2</sub>O) and the subsequent lyophilization were carried out twice to remove all traces of unreacted dye. Glycolipid **8** (7.00 mg, 3.90  $\mu$ mol, 67 %) was isolated as a red powder.

$[\alpha]_D^{23} = +40.1$  (c 0.70, CHCl<sub>3</sub>/MeOH/H<sub>2</sub>O, 1.6:1.0:0.2).

**<sup>1</sup>H-NMR** (600 MHz, CDCl<sub>3</sub>/MeOD/D<sub>2</sub>O, 1.6:1.0:0.2):  $\delta$  (ppm) = 0.71–1.04 (m, 8 H), 1.08–1.46 (m, 56 H), 1.51–1.67 (m, 6 H), 1.67–1.77 (m, 2 H), 1.99–2.06 (m, 6 H), 2.04–2.12 (m, 2 H), 2.29 (s, 3 H), 2.55 (s, 3 H), 2.58–2.63 (m<sub>c</sub>, 1 H), 2.65 (t,  $J$  = 7.6 Hz, 1 H), 2.72–2.78 (m<sub>c</sub>, 1 H), 2.90–2.97 (m, 1 H), 3.06 (dd,  $J$  = 14.5, 7.7 Hz, 1 H), 3.15–3.30 (m, 4 H), 3.37–3.45 (m, 2 H), 3.52–3.58 (m, 2 H), 3.57–3.78 (m, 14 H), 3.81–3.93 (m, 5 H), 3.93–4.00 (m, 3 H), 4.03 (dd,  $J$  = 8.0, 3.7 Hz, 1 H), 4.06–4.14 (m, 2 H), 4.24–4.29 (m, 1 H), 4.93 (d,  $J$  = 2.7 Hz, 1 H), 5.31–5.40 (m, 2 H), 5.43 (dd,  $J$  = 15.3, 7.6 Hz, 1 H), 5.65–5.77 (m<sub>c</sub>, 1 H), 6.19 (s, 1 H), 6.34 (d,  $J$  = 4.0 Hz, 1 H), 6.96 (d,  $J$  = 4.0 Hz, 1 H), 7.22 (s, 1 H), 7.91 (s, 1 H).

Further signals were covered by signals of the solvent mixture.

SUPPORTING INFORMATION

---

**<sup>13</sup>C-NMR** (151 MHz, CDCl<sub>3</sub>/MeOD/D<sub>2</sub>O, 1.6:1.0:0.2):  $\delta$  (ppm) = 11.7, 14.5, 15.2, 23.2, 23.3, 25.2, 25.7, 25.8, 27.8, 27.8, 29.8, 29.9, 29.9, 29.9, 30.0, 30.1, 30.1, 30.2, 30.3, 30.3, 30.4, 30.4, 32.5, 32.5, 33.0, 35.2, 35.8, 36.8, 52.6, 53.7, 60.4, 61.0, 62.1, 64.2, 69.2, 69.6, 70.2, 70.3, 70.7, 70.8, 70.9, 70.9, 71.0, 72.1, 72.3, 72.7, 73.7, 74.0, 75.2, 75.6, 75.8, 78.8, 79.5, 80.5, 101.8, 103.4, 103.8, 117.5, 121.3, 124.8, 129.0, 129.5, 130.5, 134.0, 135.4, 135.9, 145.2, 157.4, 161.2, 174.2, 176.6.

**<sup>19</sup>F-NMR** (471 MHz, CDCl<sub>3</sub>/MeOD/D<sub>2</sub>O, 1.6:1.0:0.2):  $\delta$  (ppm) = -143.1 (q,  $J$  = 33.1 Hz).

**IR** (ATR):  $\tilde{\nu}$  (cm<sup>-1</sup>) = 3350, 2920, 2852, 1738, 1648, 1605, 1536, 1360, 1252, 1077, 1034, 802.

**MS** (ESI):  $m/z$  (%) = 921.0 (100) [M+2Na]<sup>2+</sup>, 1819.1 (16) [M+Na]<sup>+</sup>. **HRMS** (ESI):  $m/z$  calculated for: C<sub>91</sub>H<sub>156</sub>O<sub>23</sub>BF<sub>2</sub>N<sub>7</sub>S [M+Na]<sup>+</sup>: 1819.0939, found: 1819.0944.

## SUPPORTING INFORMATION

## Synthesis of Azidosphingosine 10

Protected azidosphingosine **10** was synthesized via a combination of different literature known transformations.<sup>[6]</sup> Starting point of this sequence shown below was Garner's aldehyde (**48**),<sup>[7]</sup> which was synthesized from enantiomerically pure amino acid L-serine.

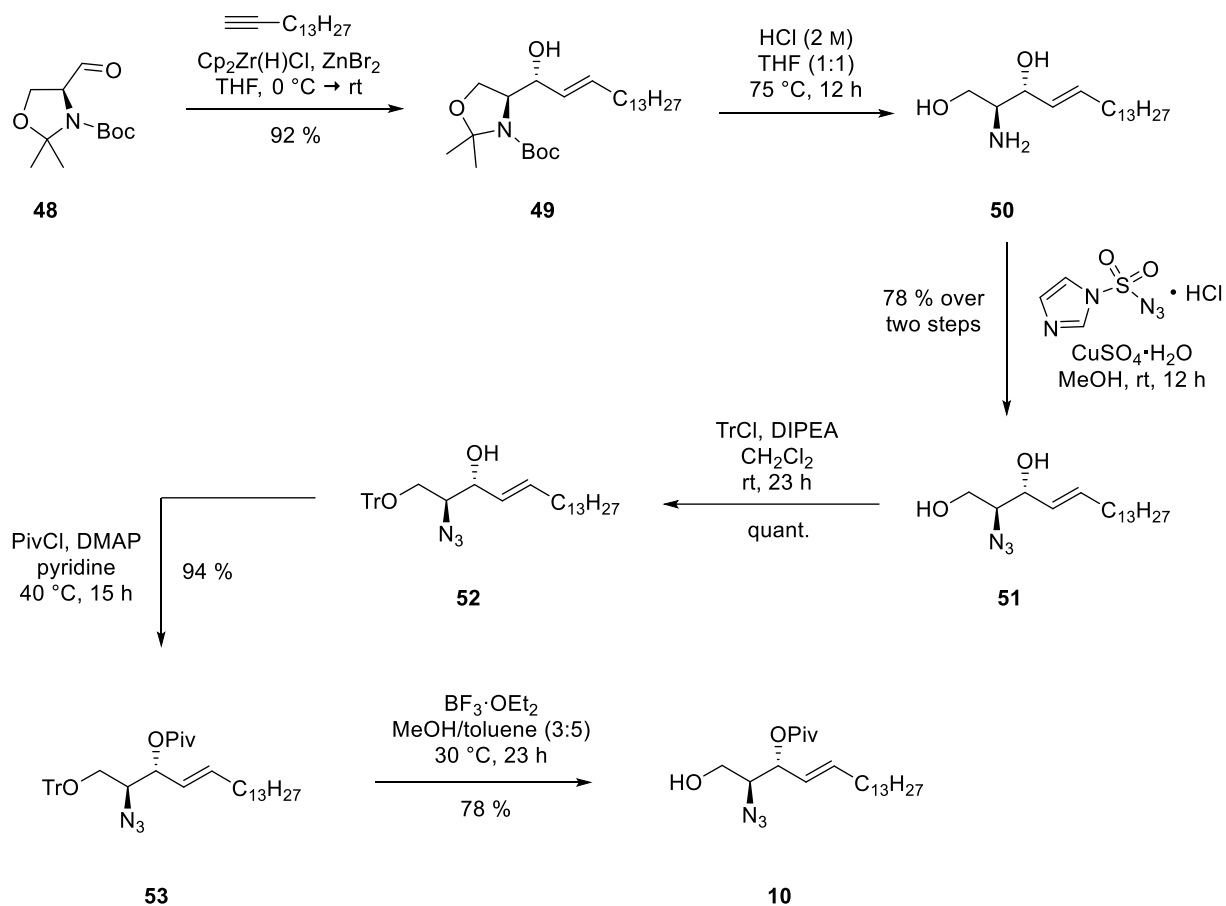





## SUPPORTING INFORMATION

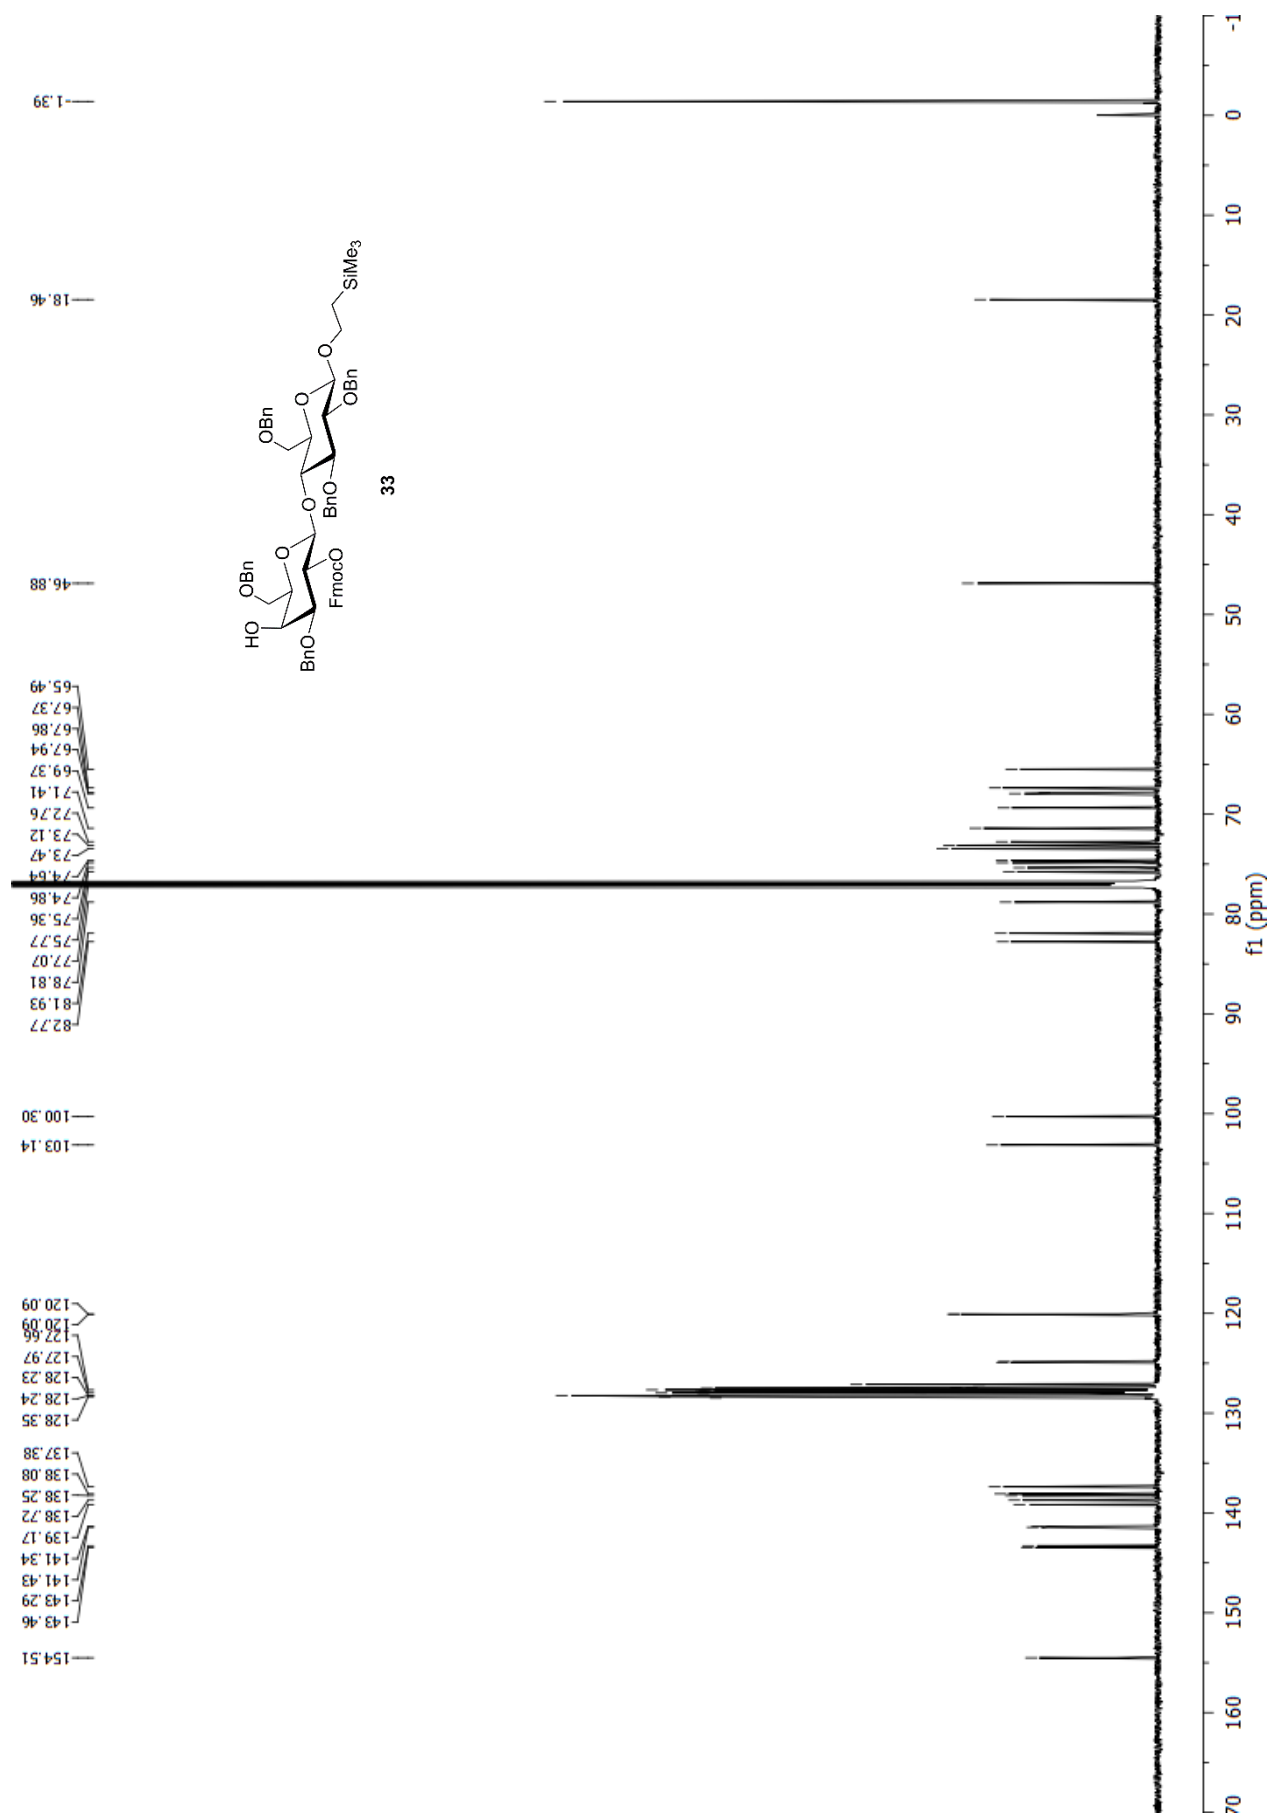



## SUPPORTING INFORMATION

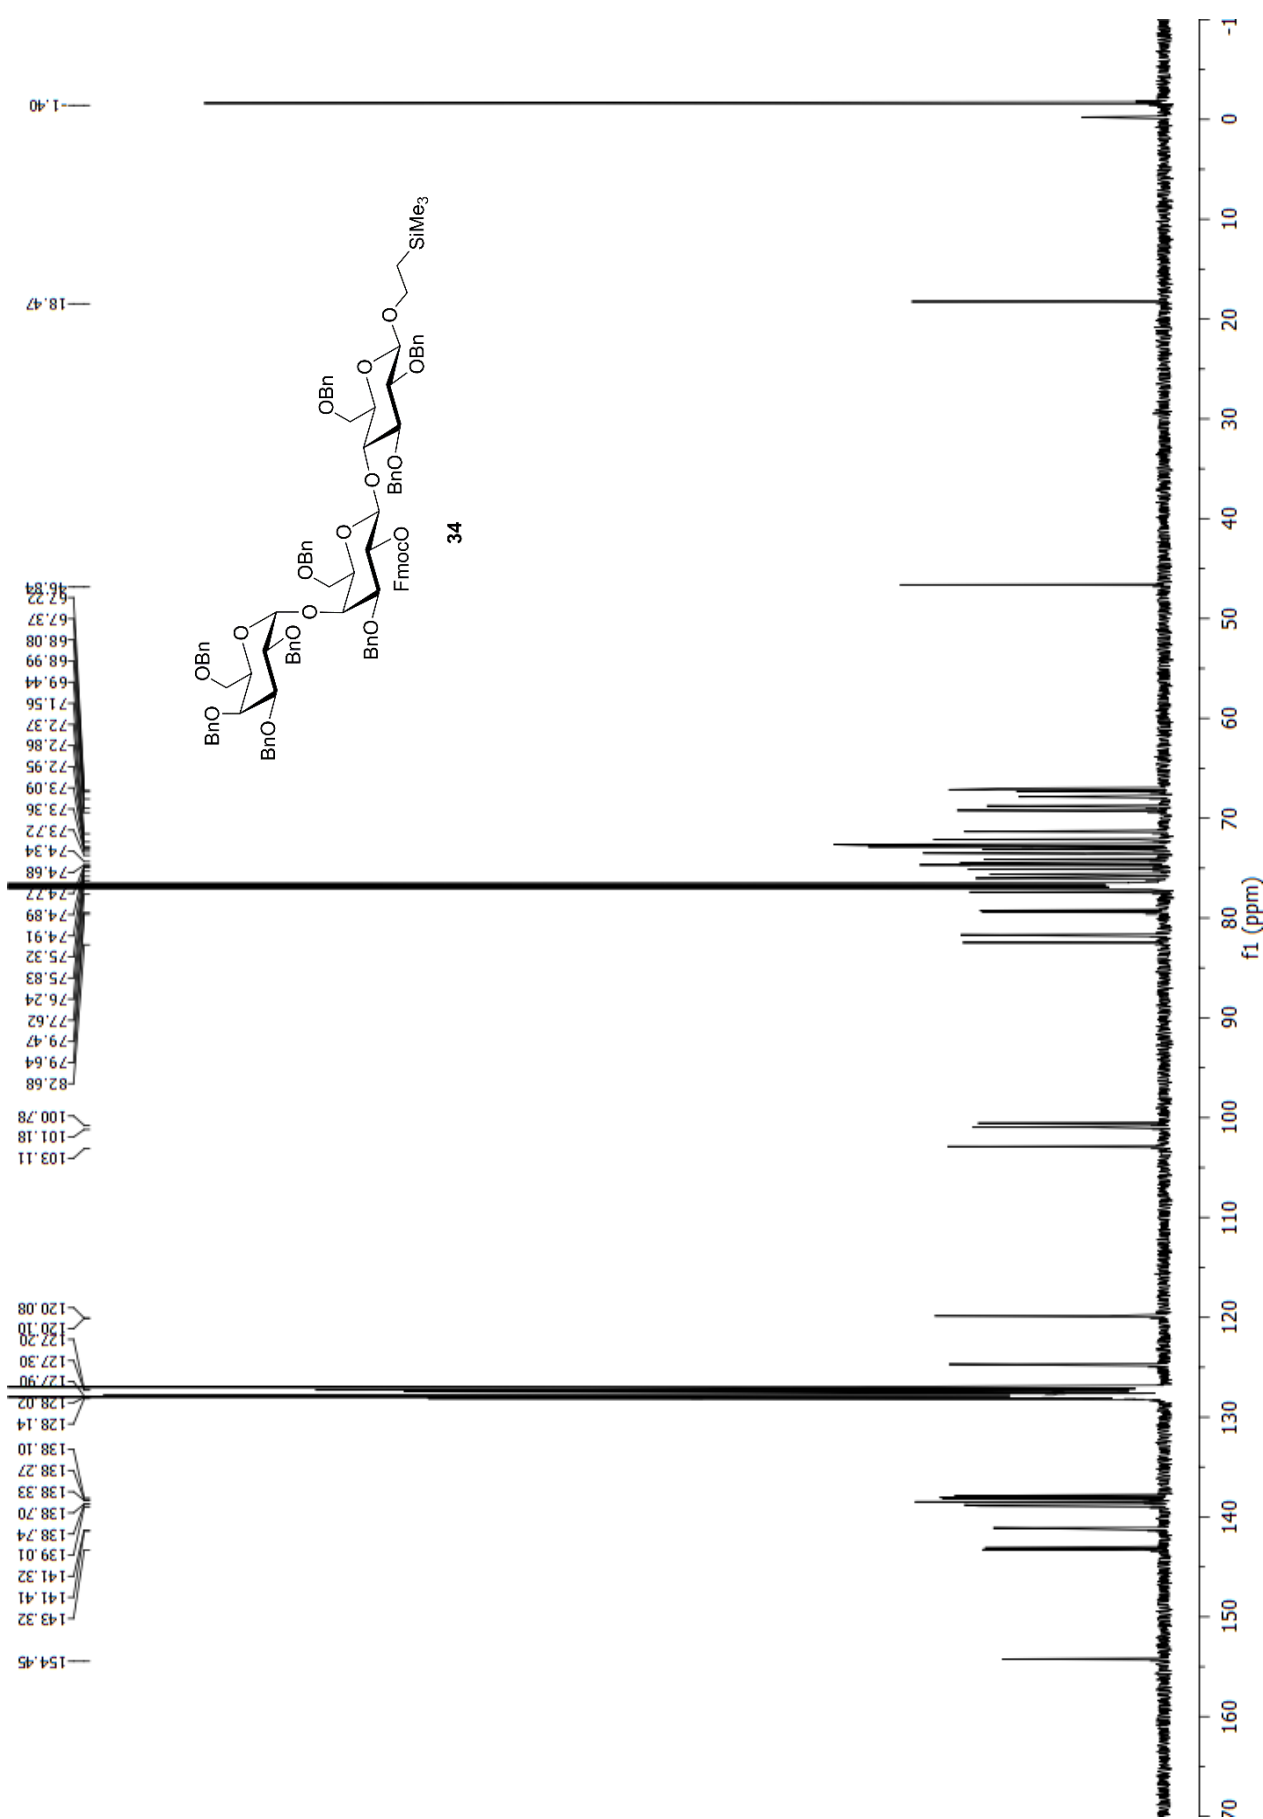

## SUPPORTING INFORMATION

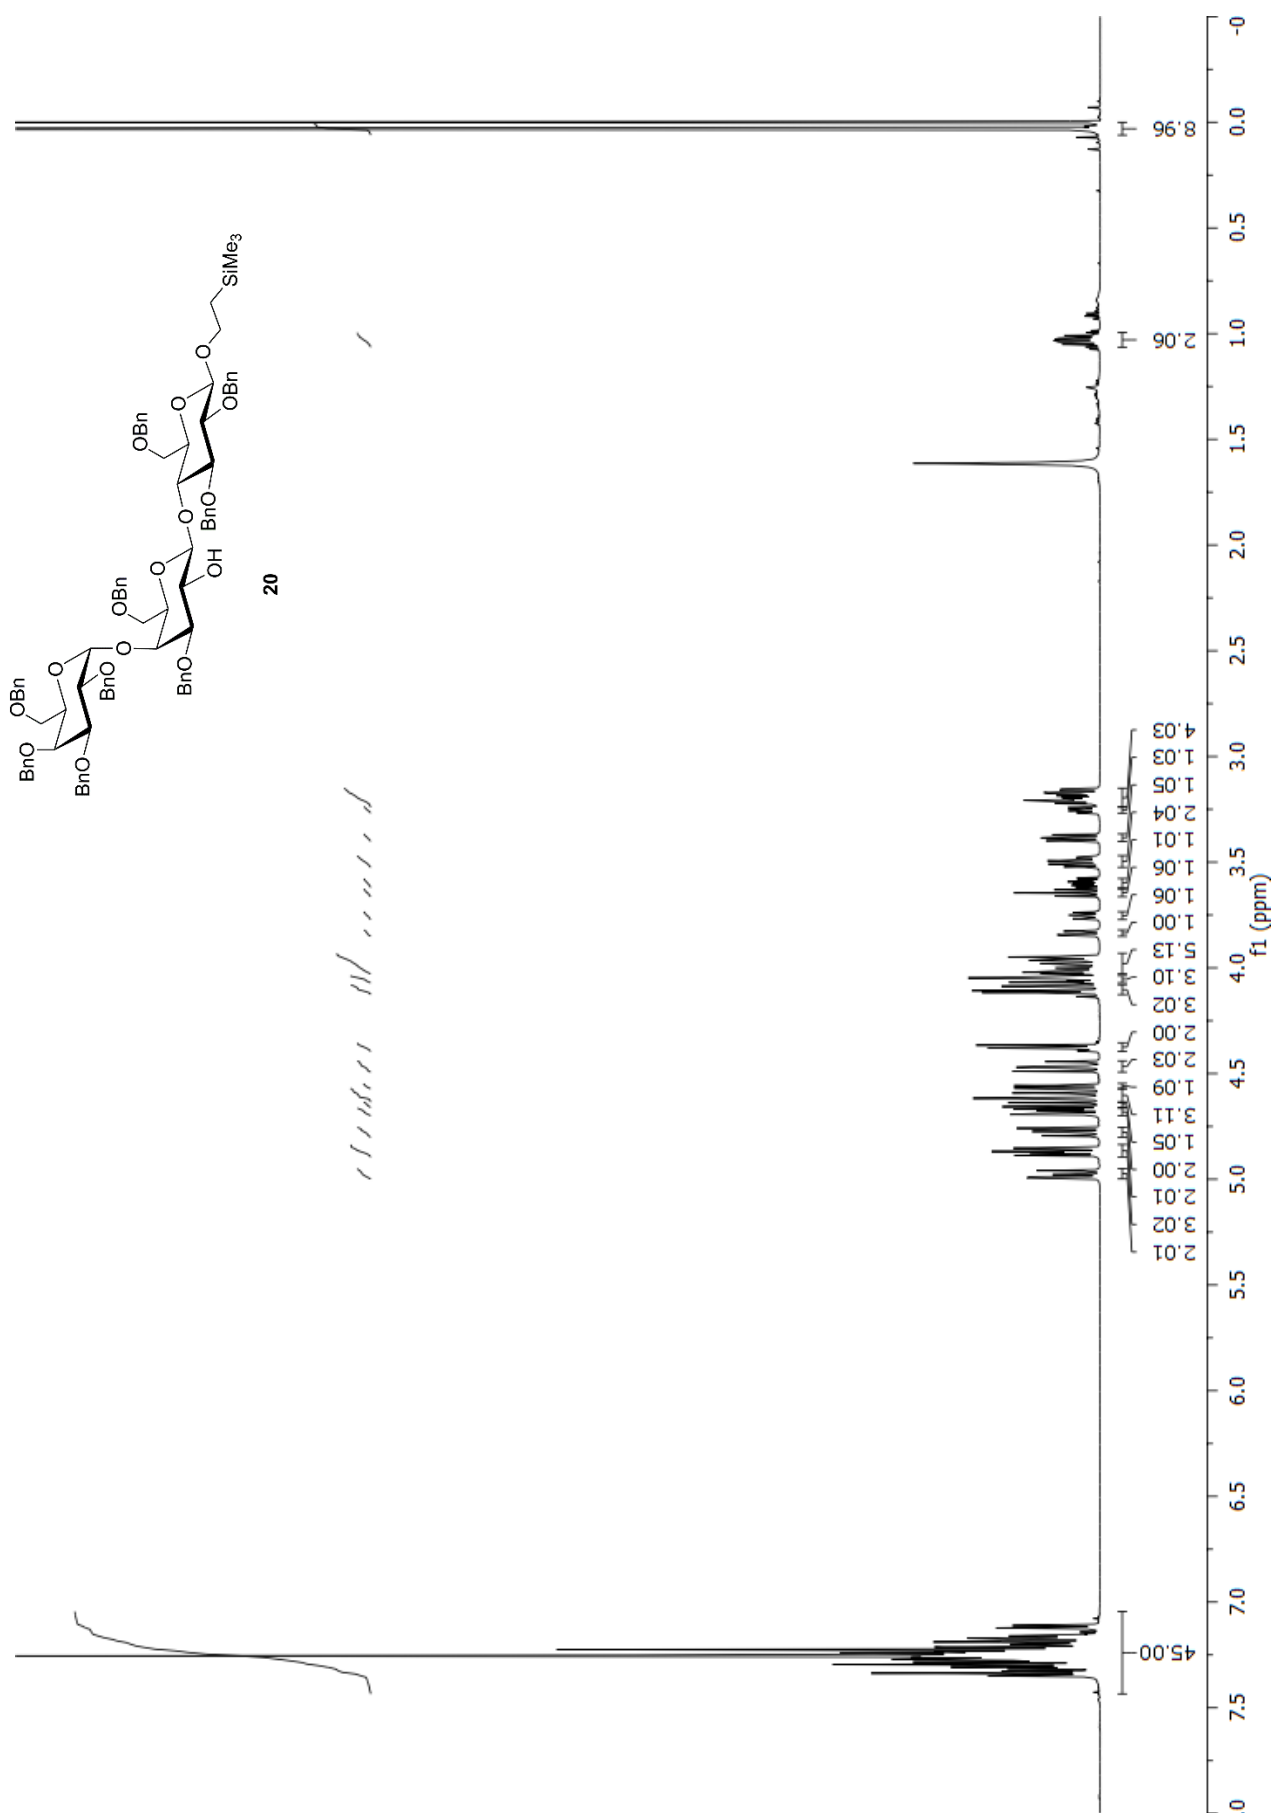

## SUPPORTING INFORMATION

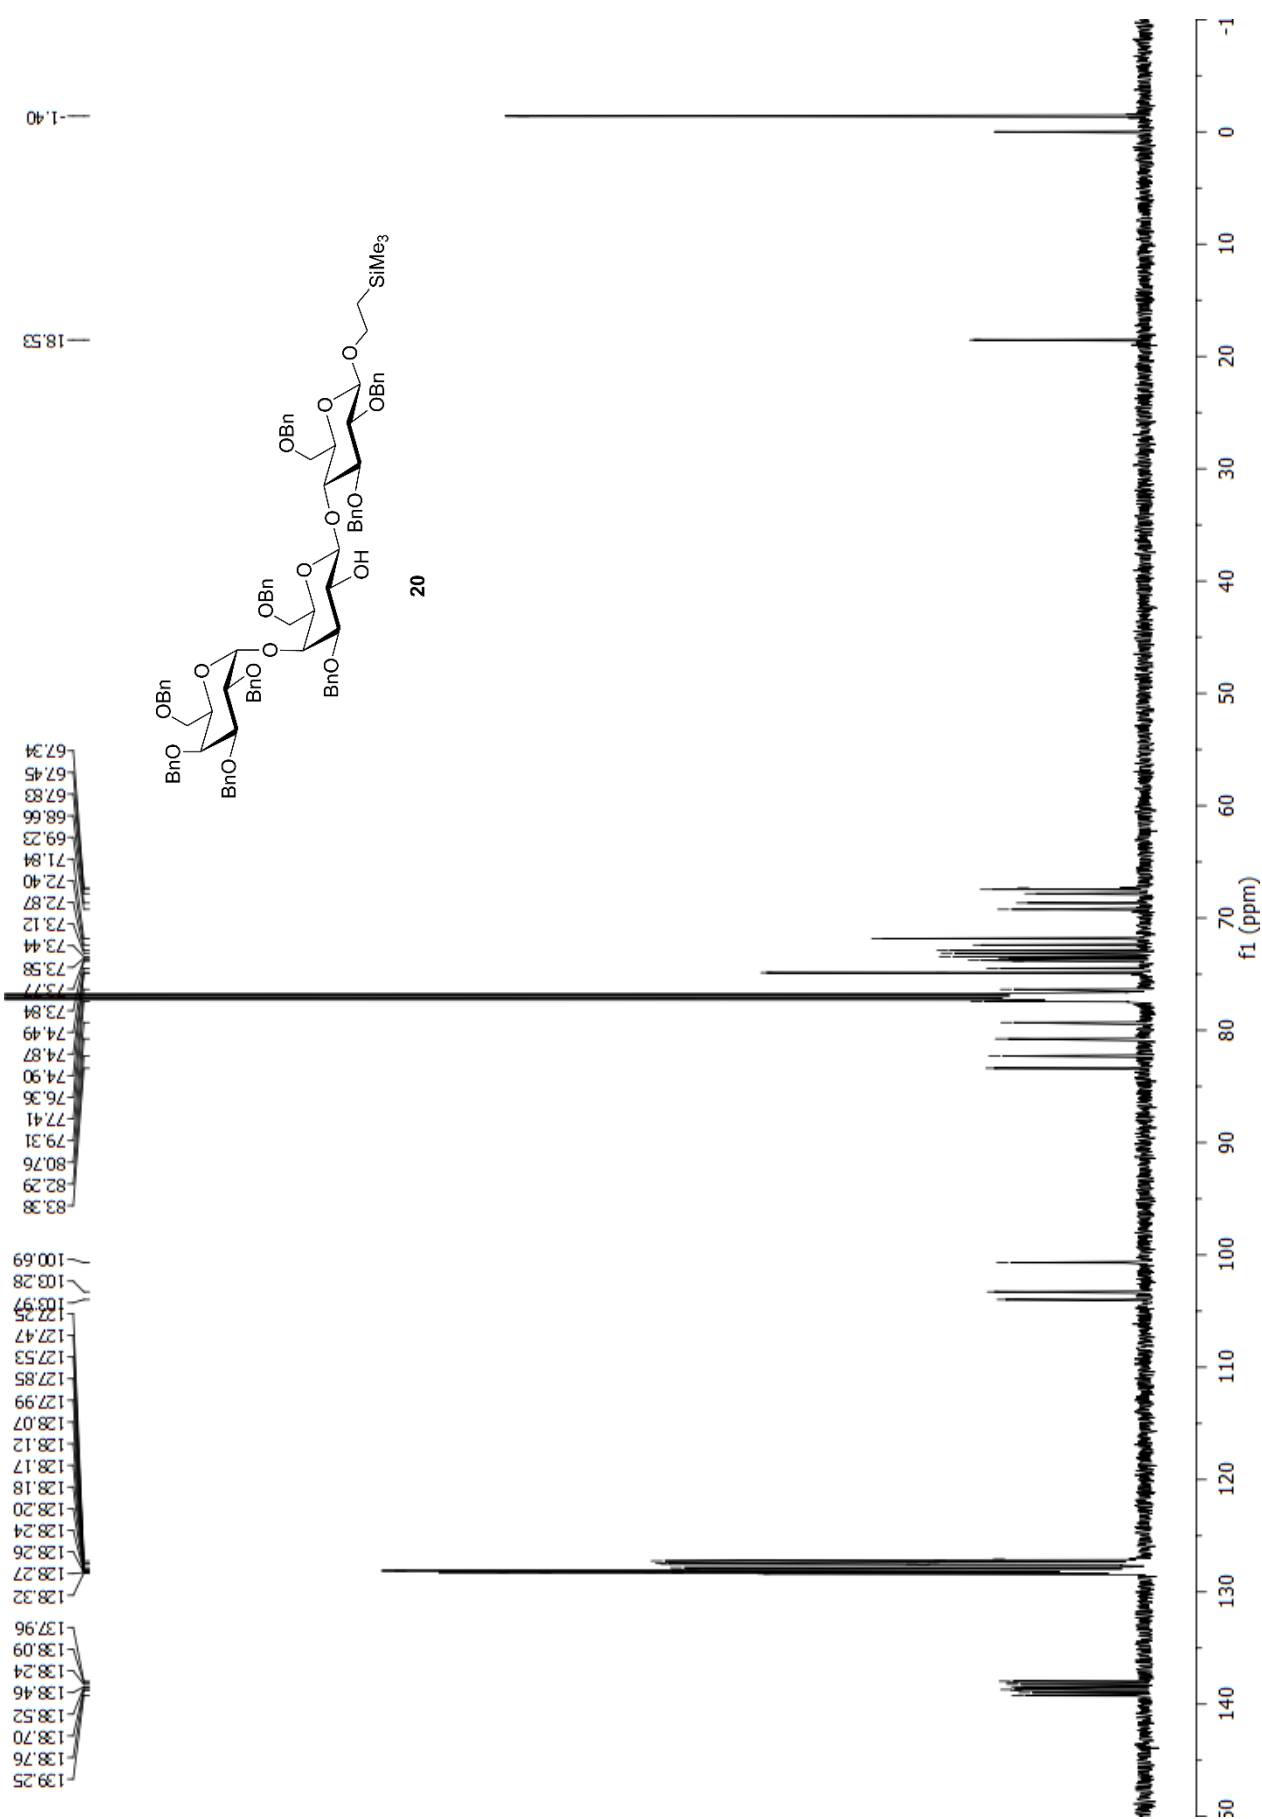

## SUPPORTING INFORMATION

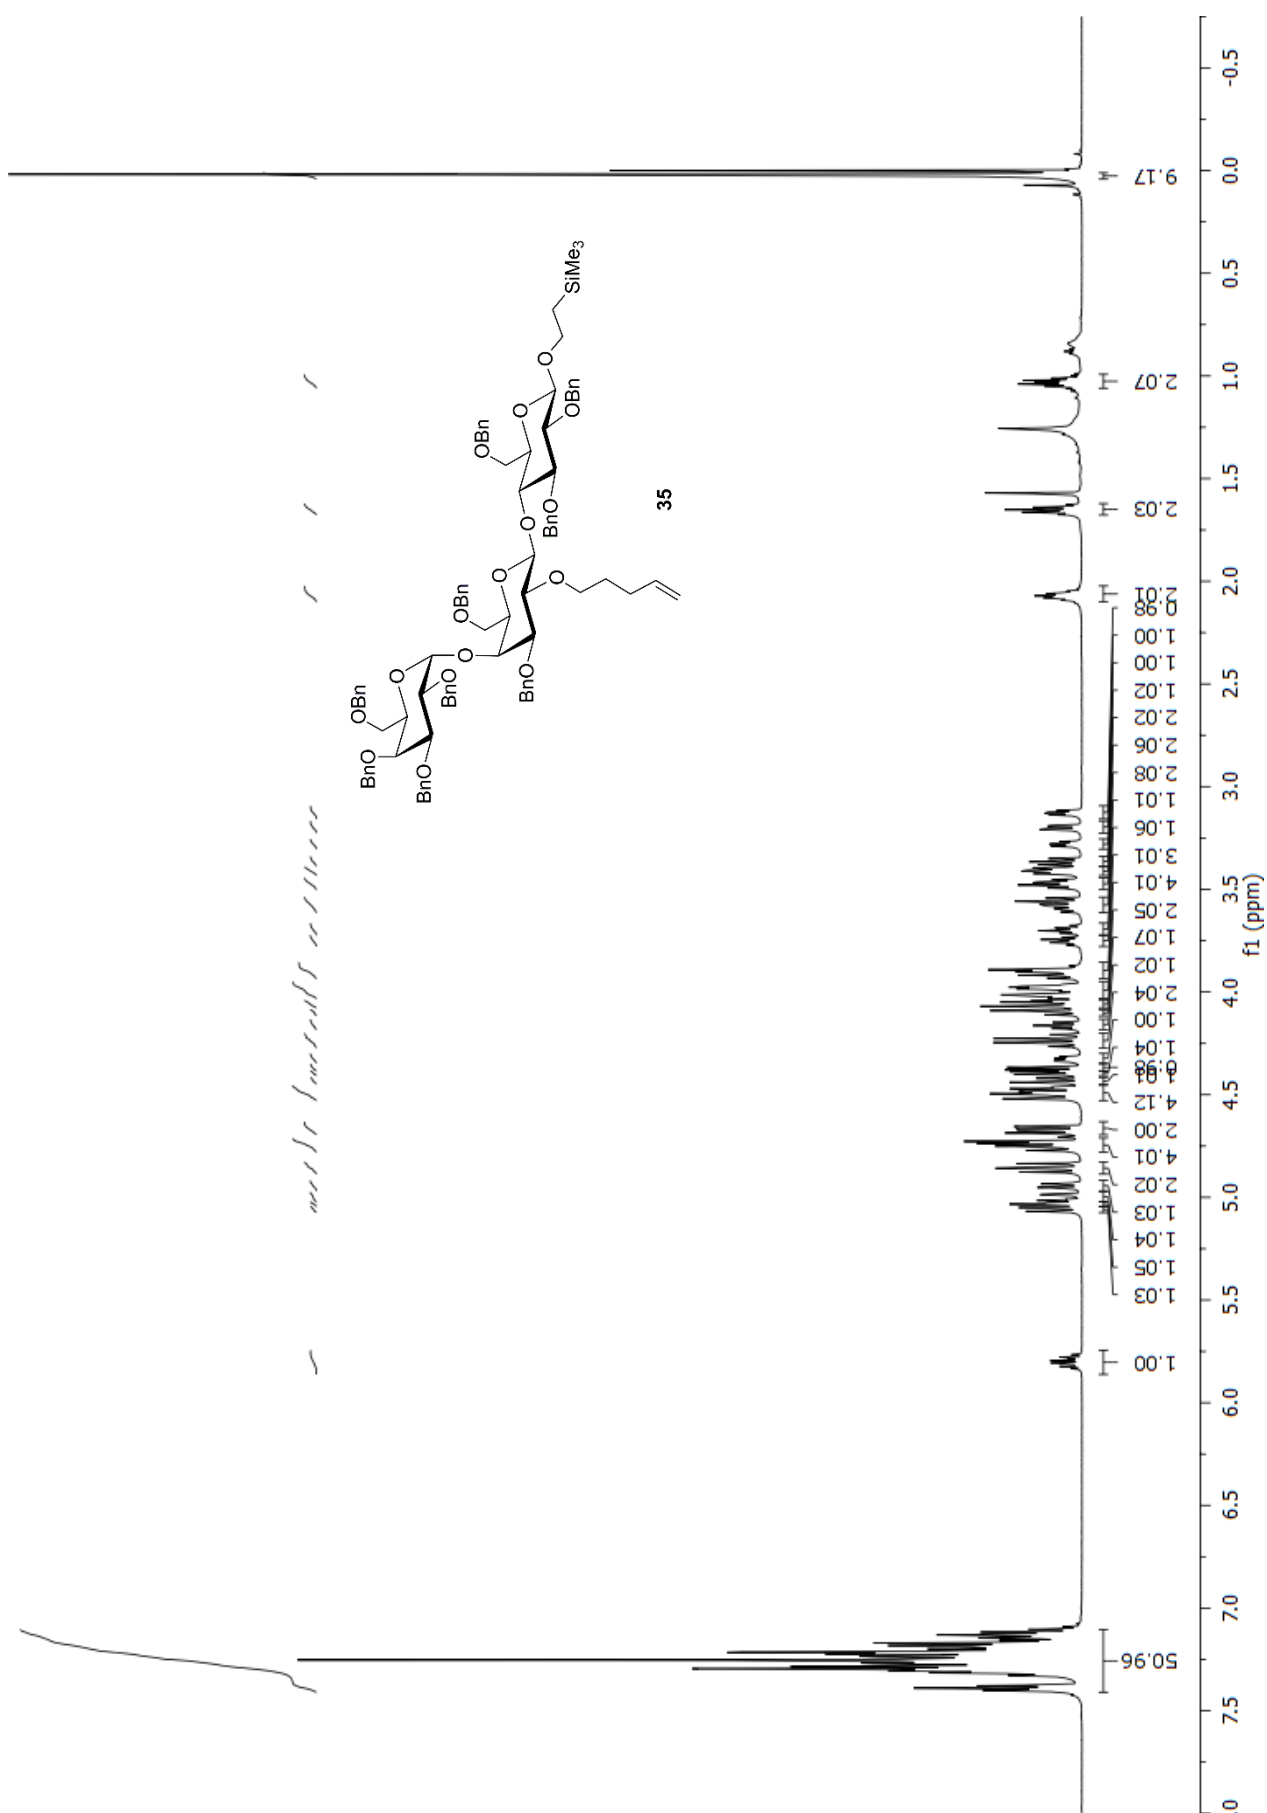

## SUPPORTING INFORMATION

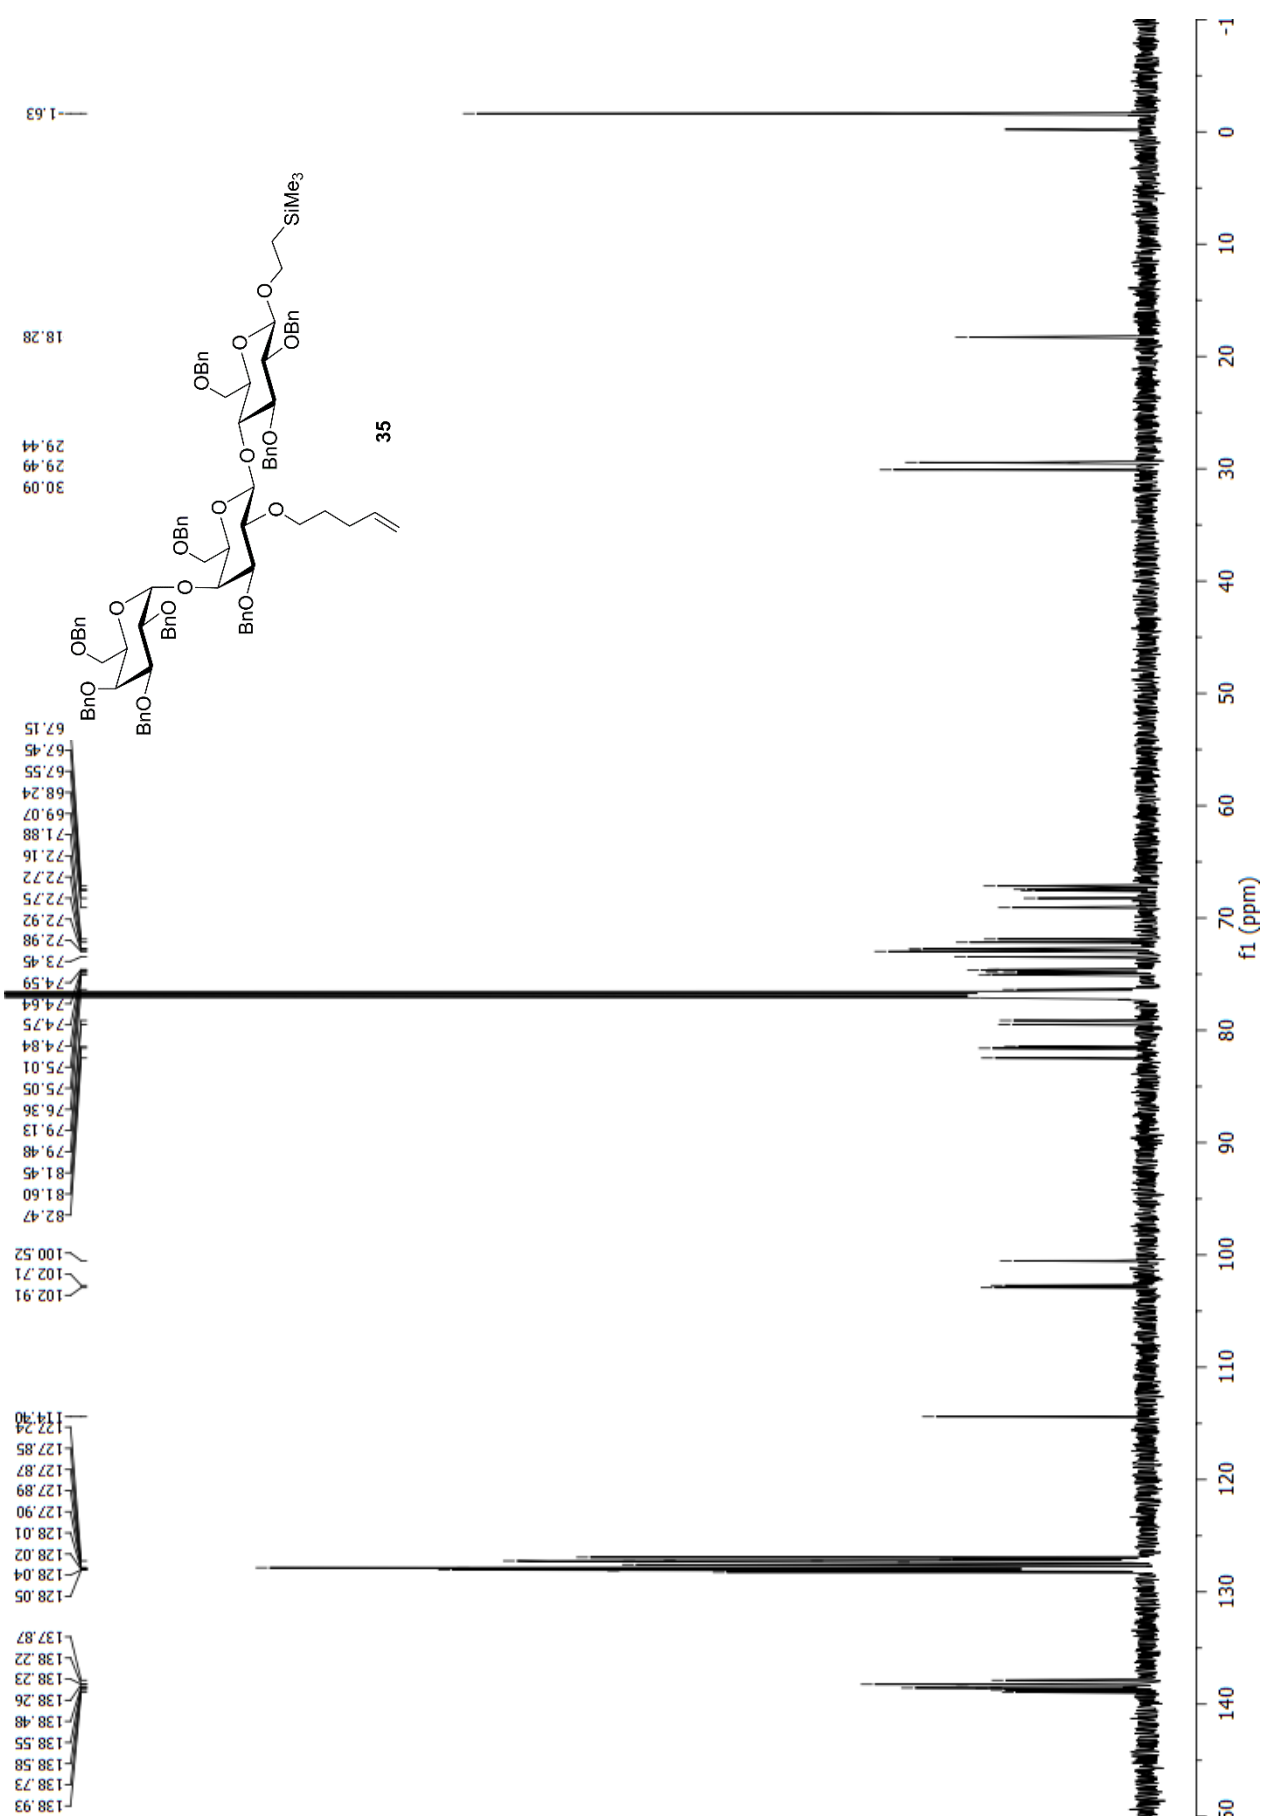



## SUPPORTING INFORMATION

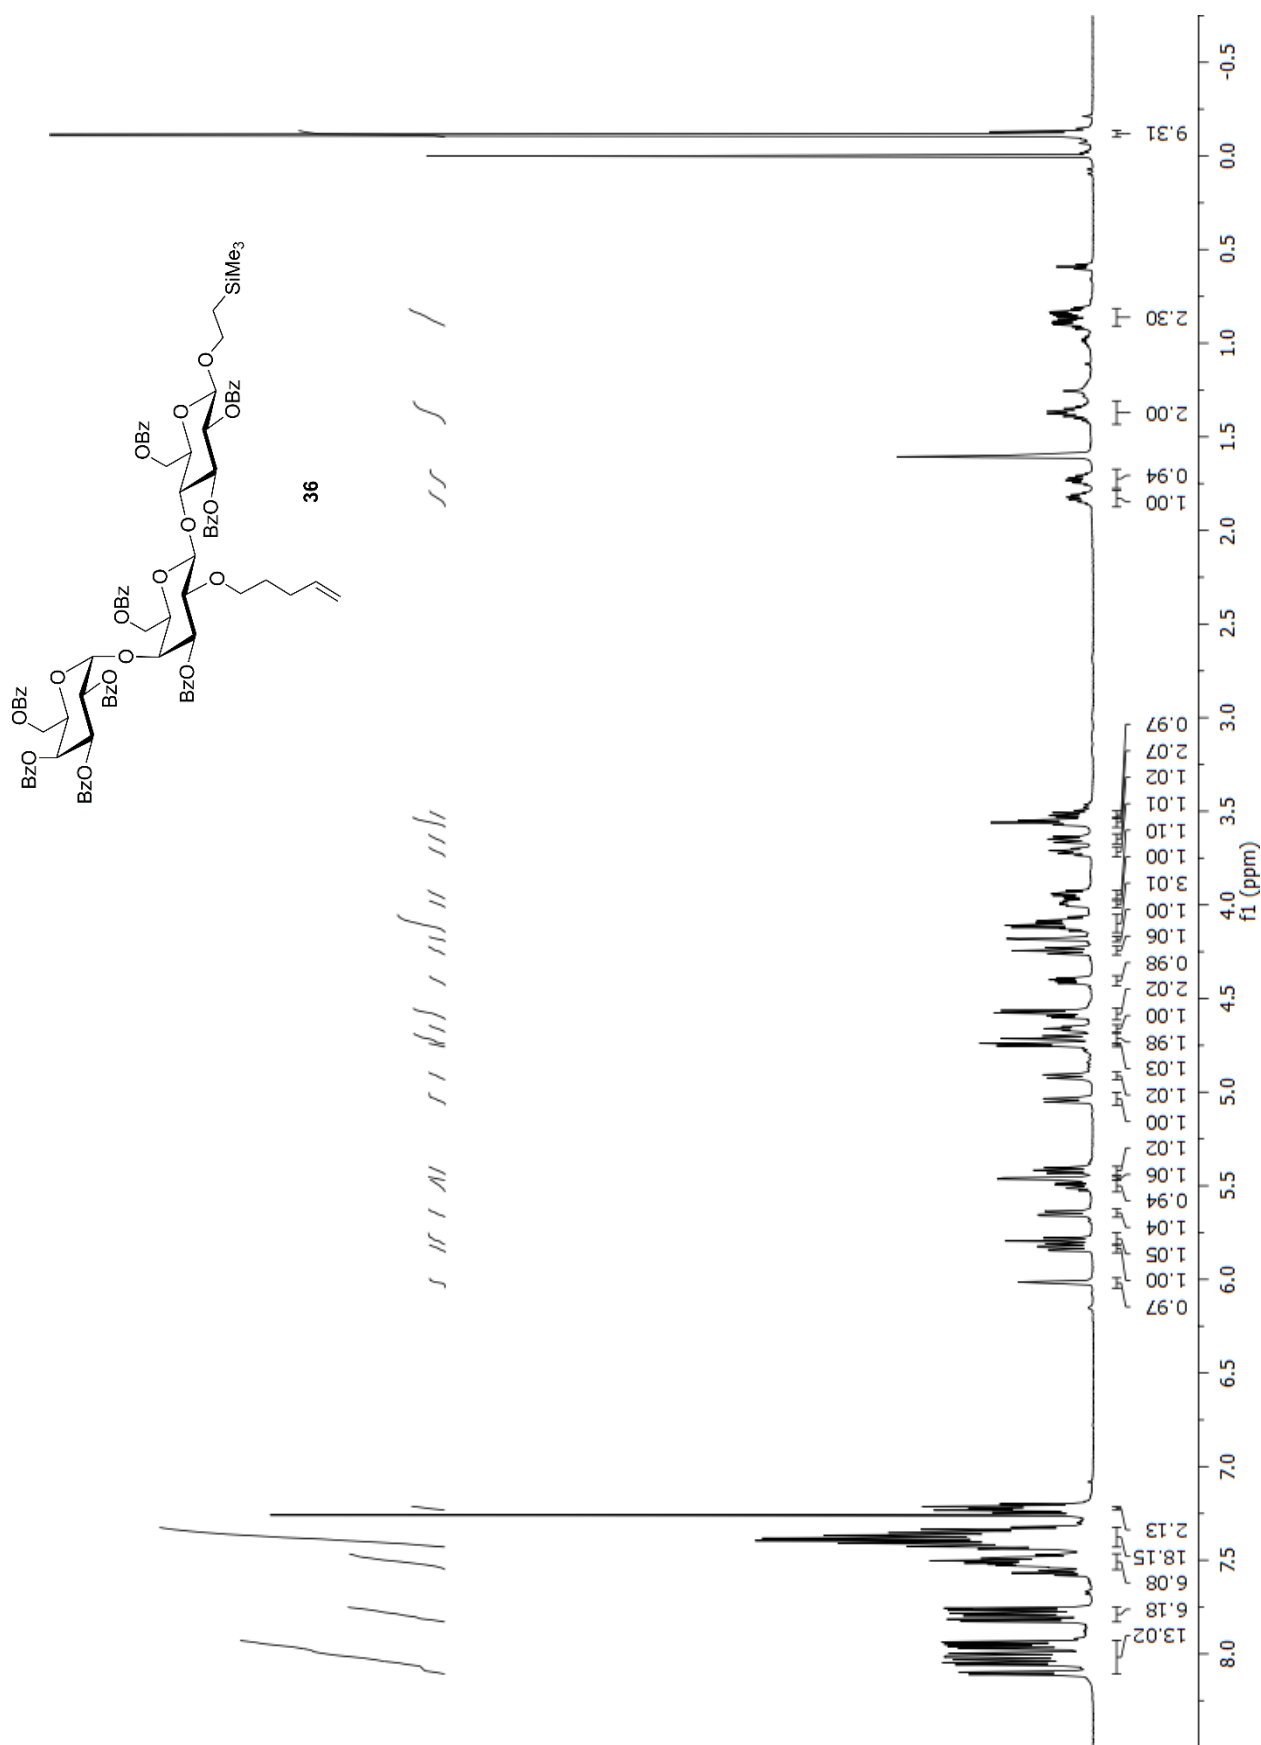

## SUPPORTING INFORMATION

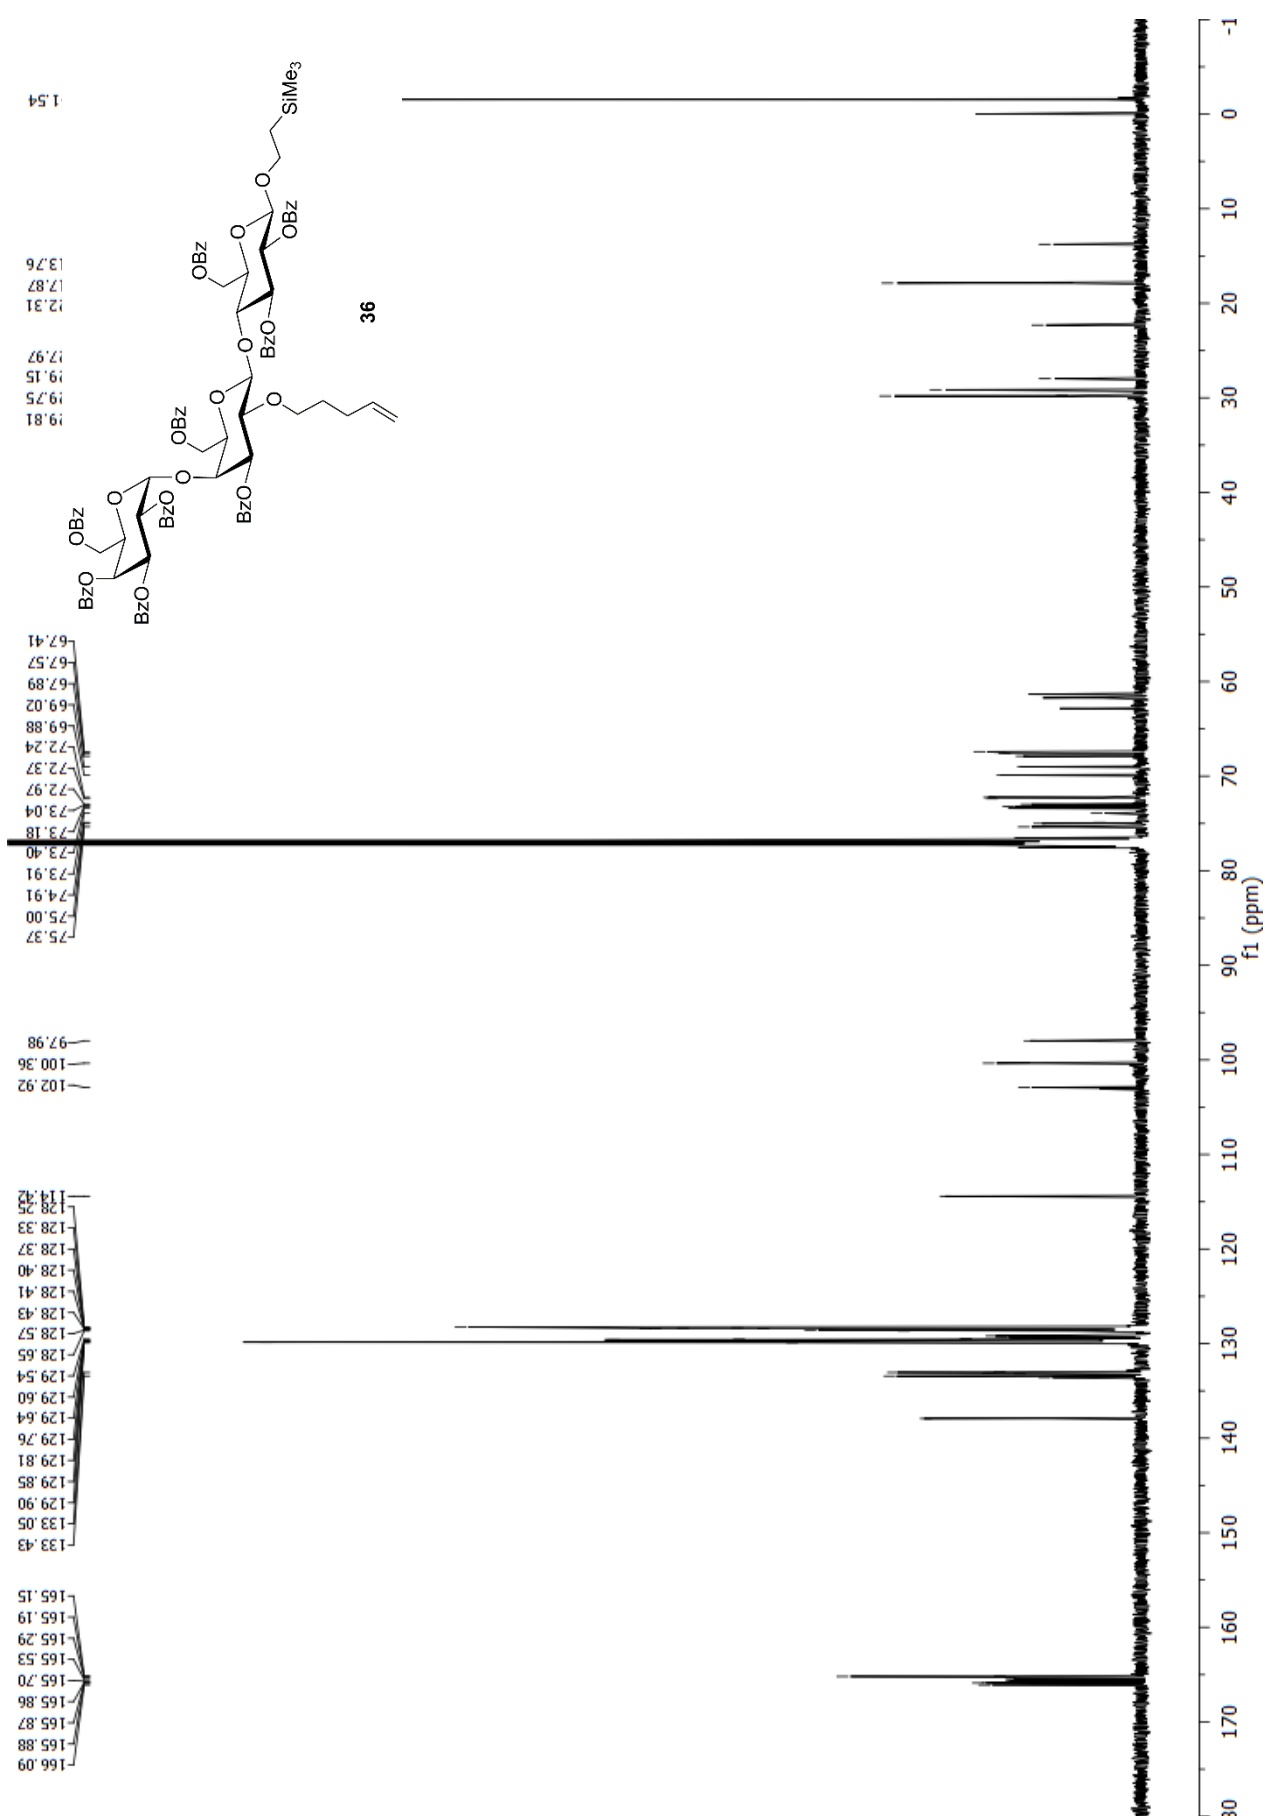



## SUPPORTING INFORMATION

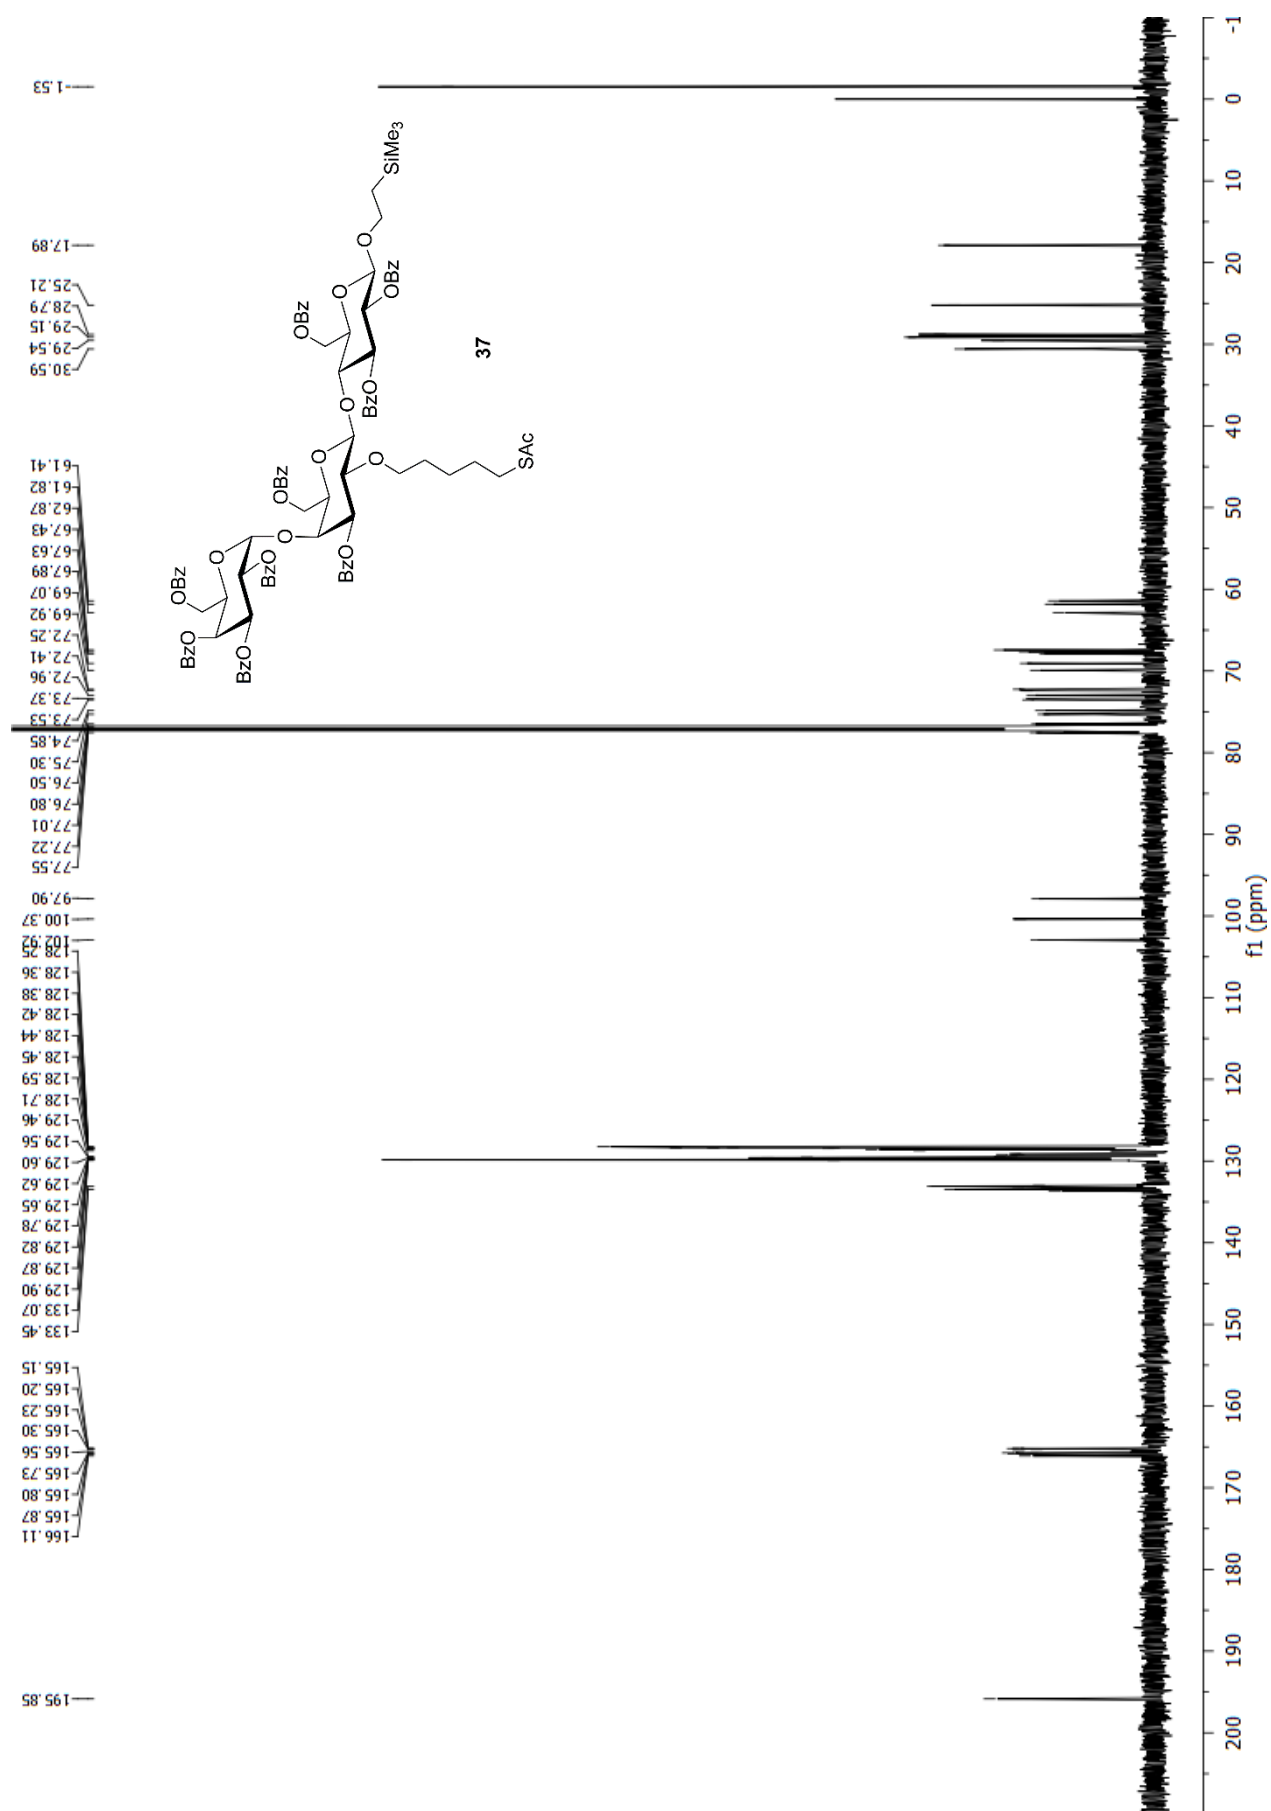

## SUPPORTING INFORMATION

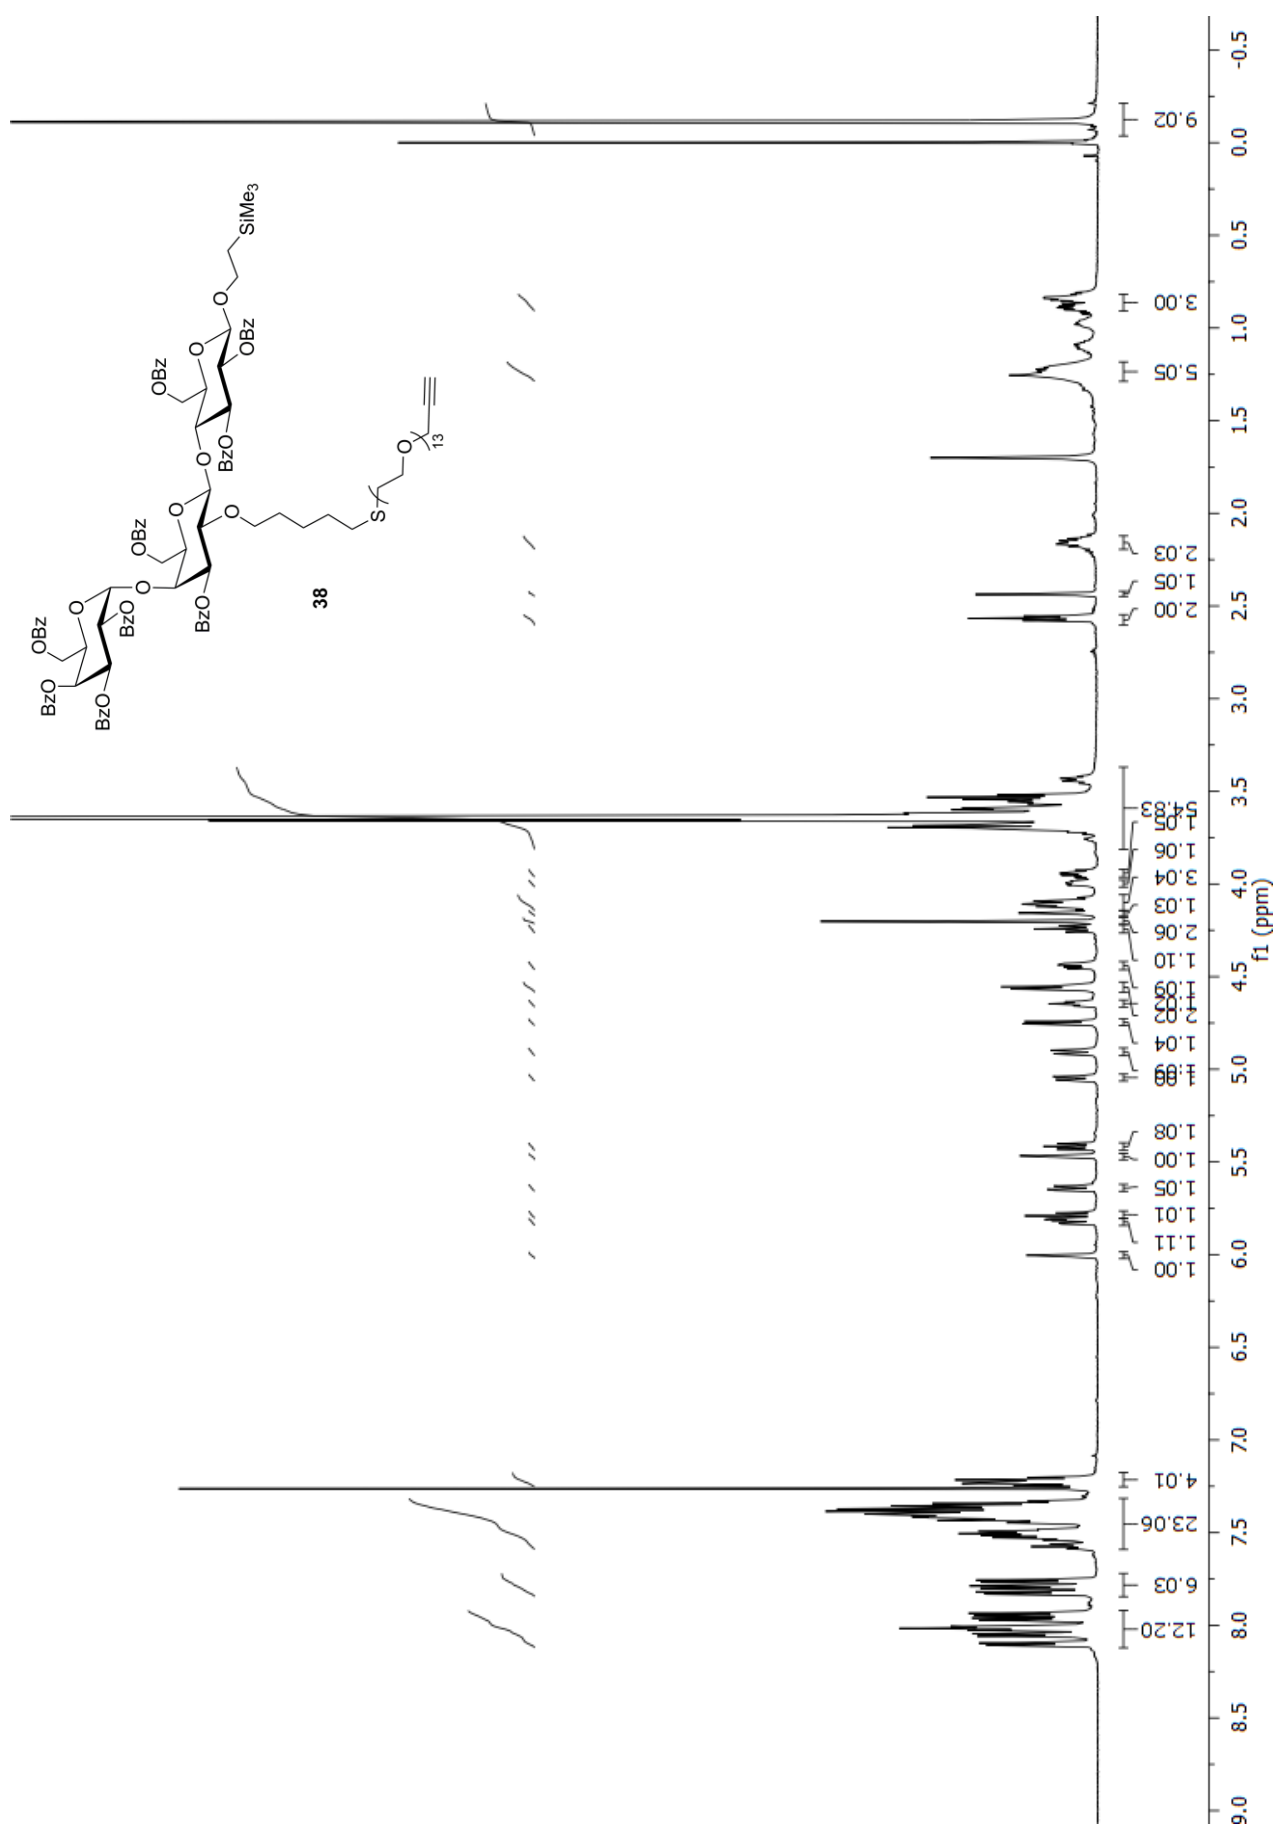

## SUPPORTING INFORMATION

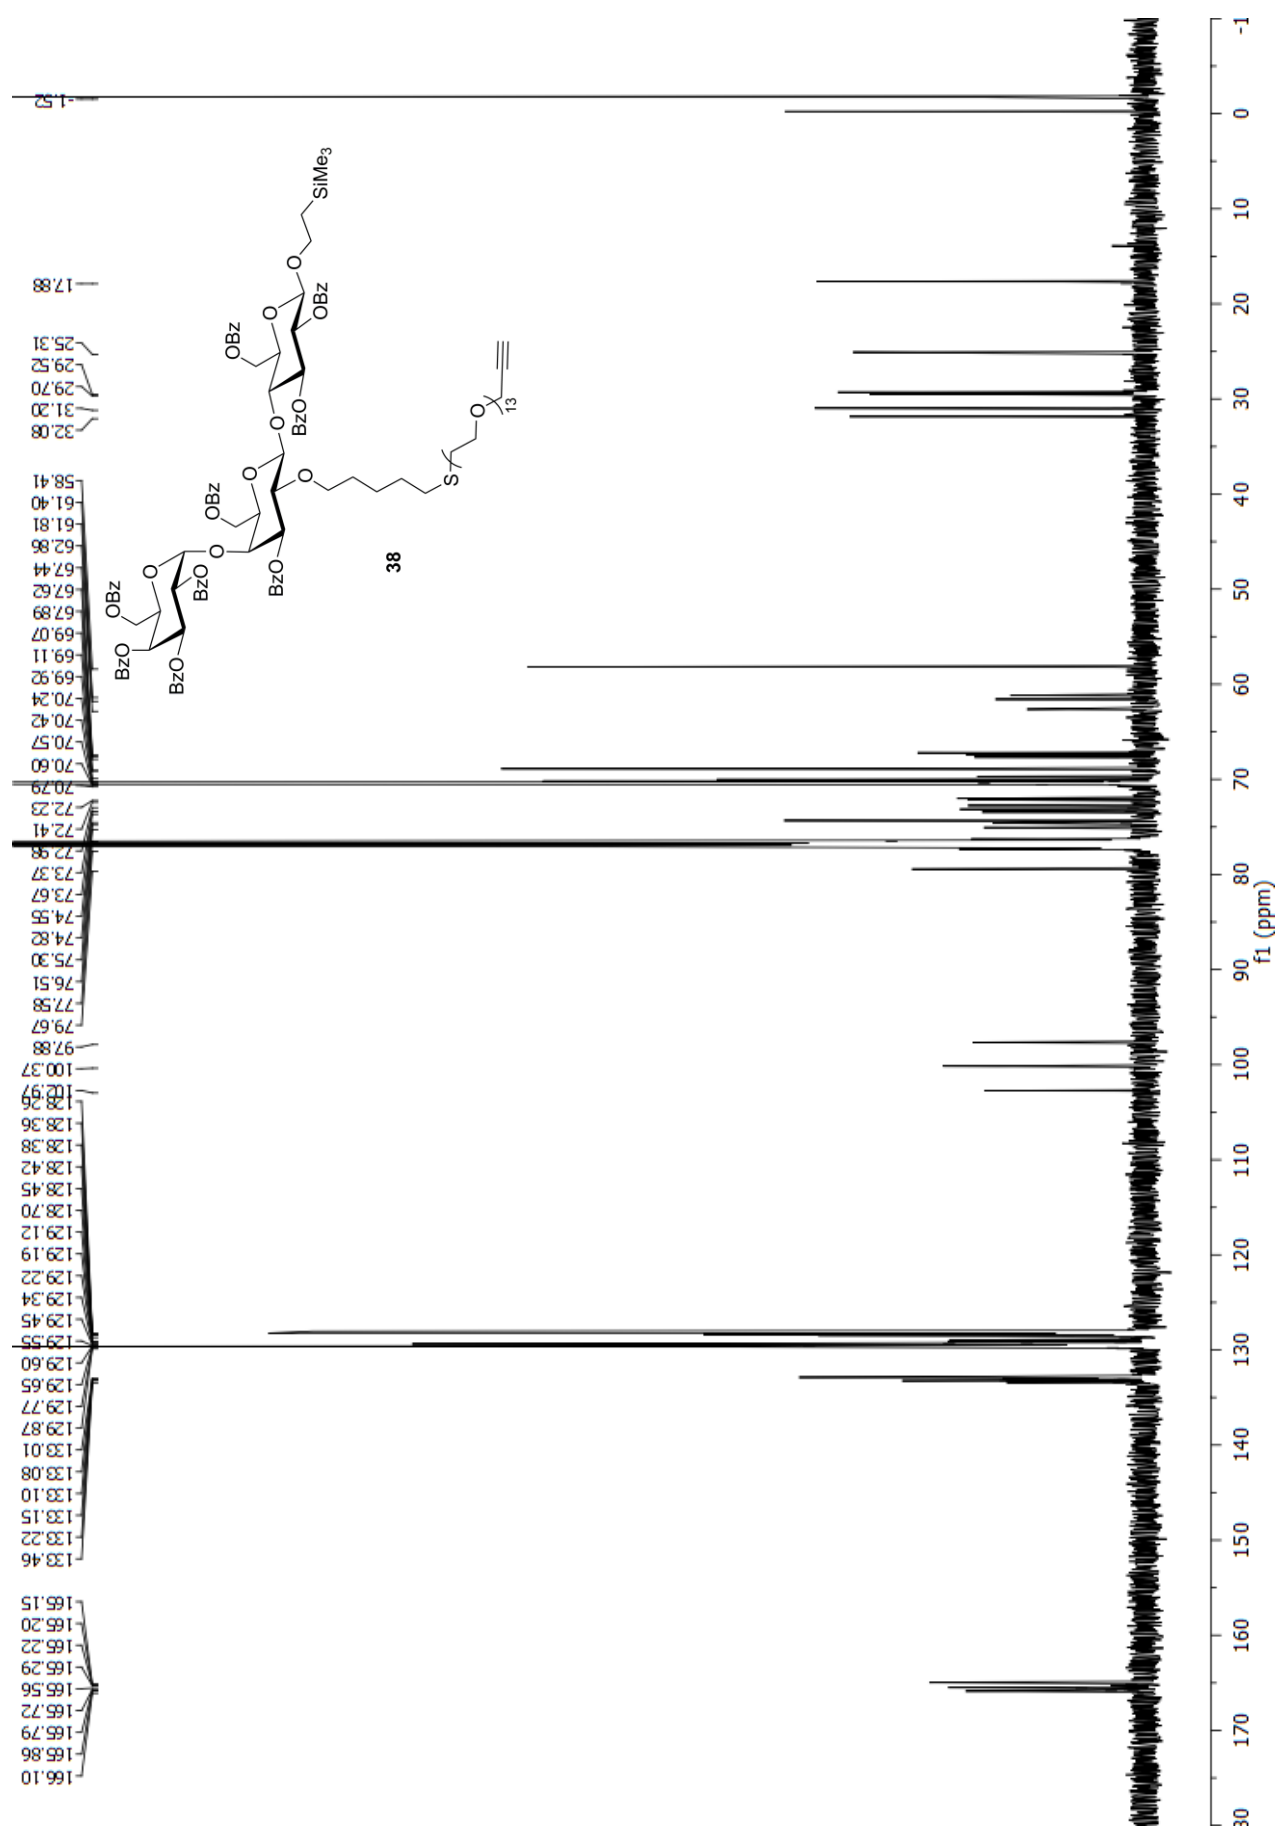

## SUPPORTING INFORMATION

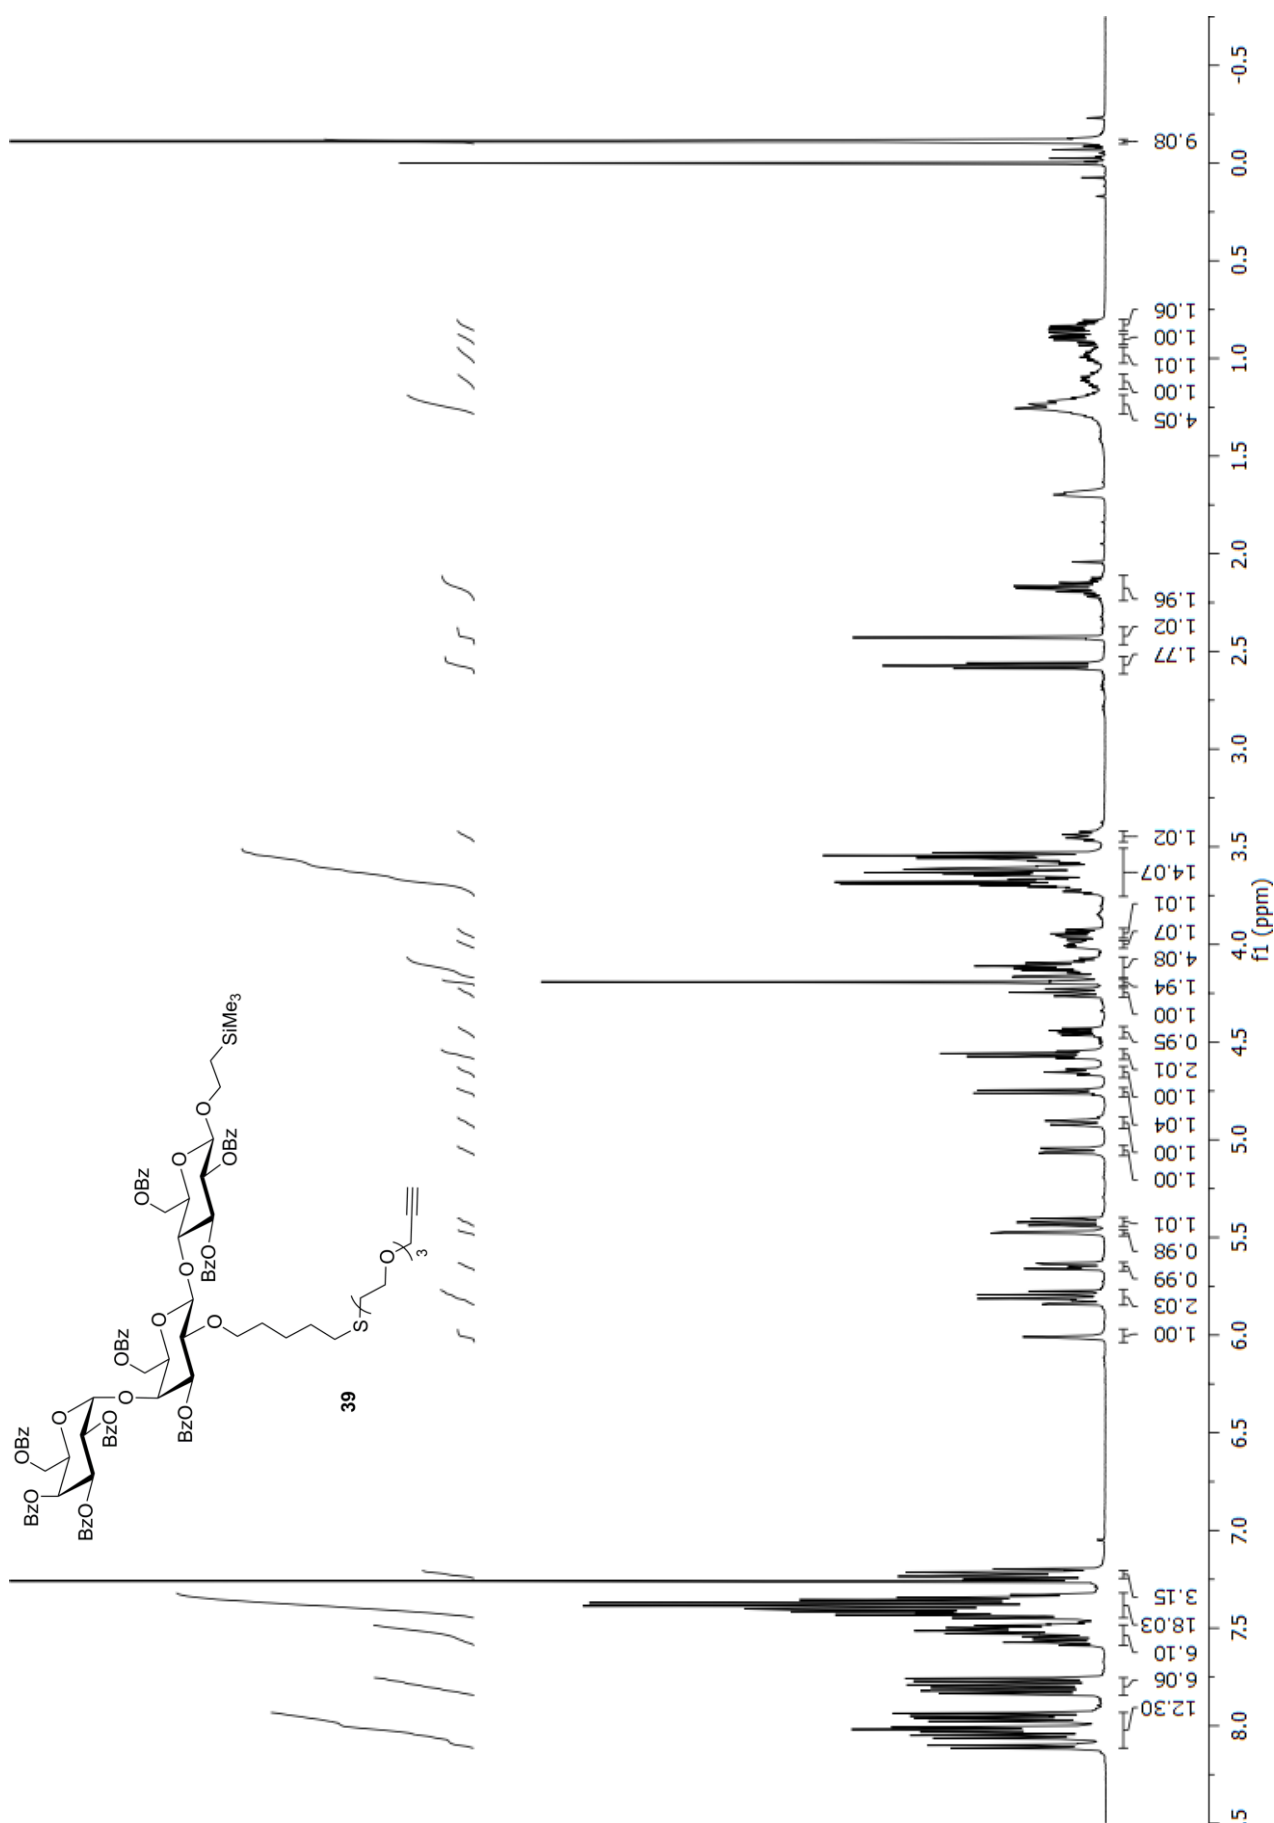





## SUPPORTING INFORMATION

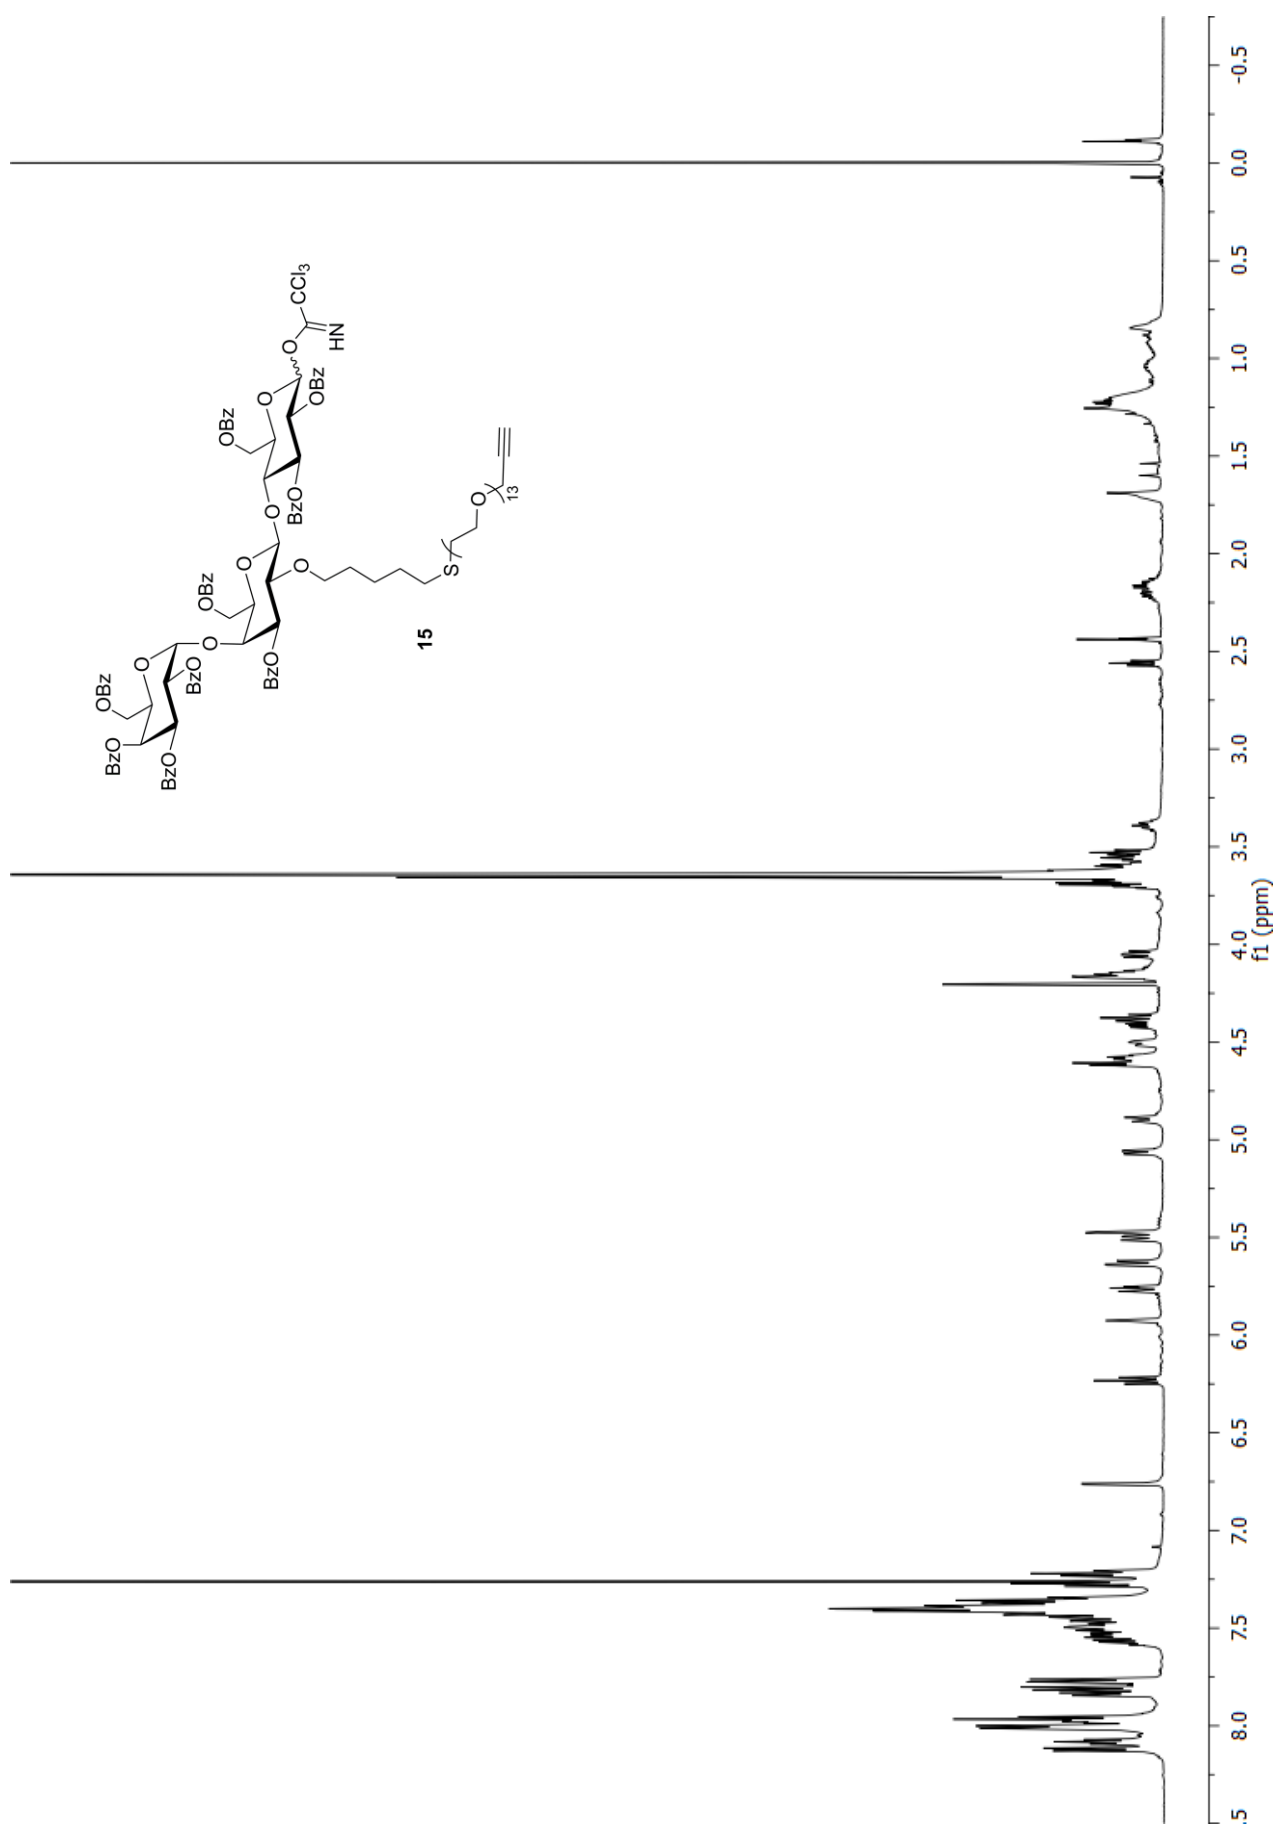

## SUPPORTING INFORMATION

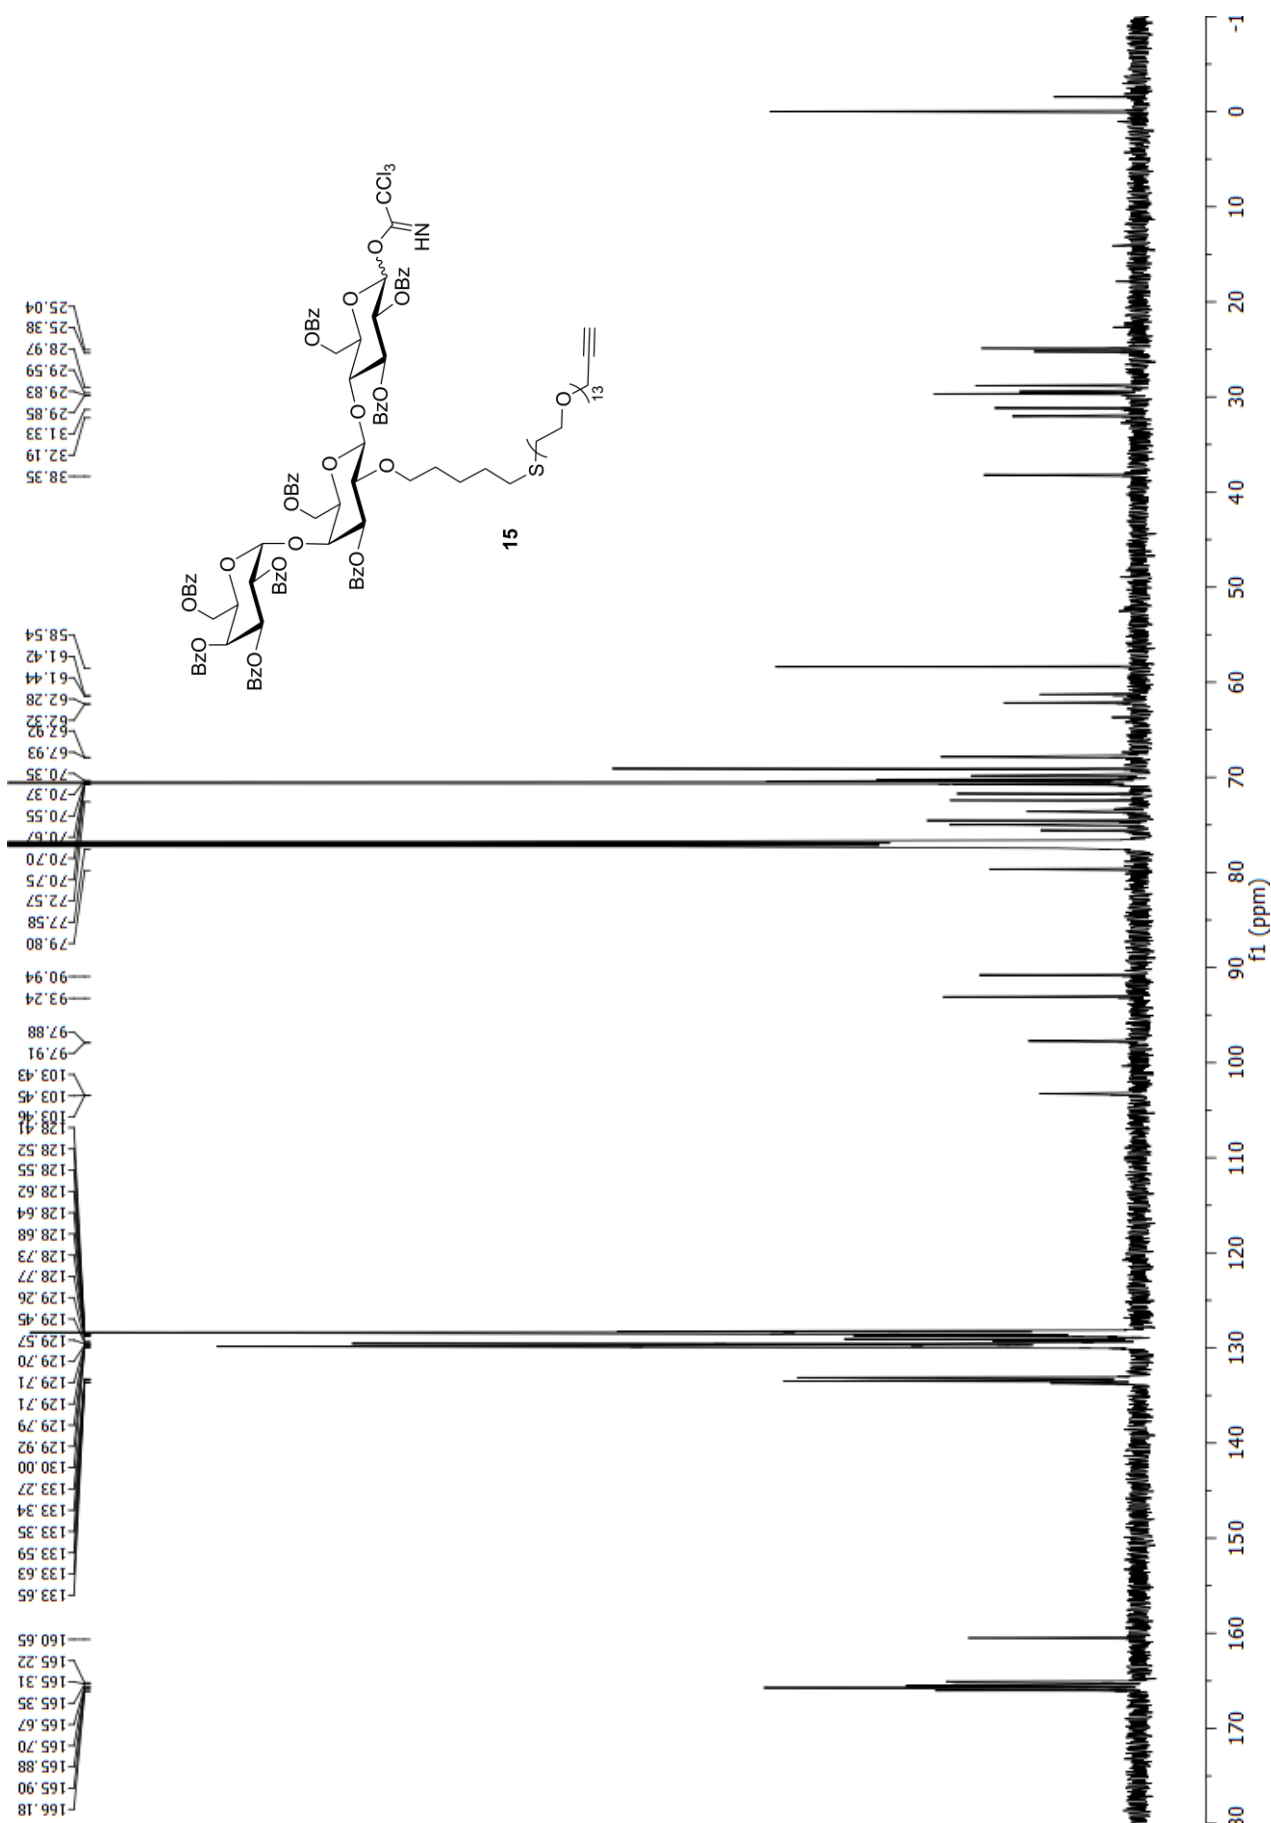

## SUPPORTING INFORMATION

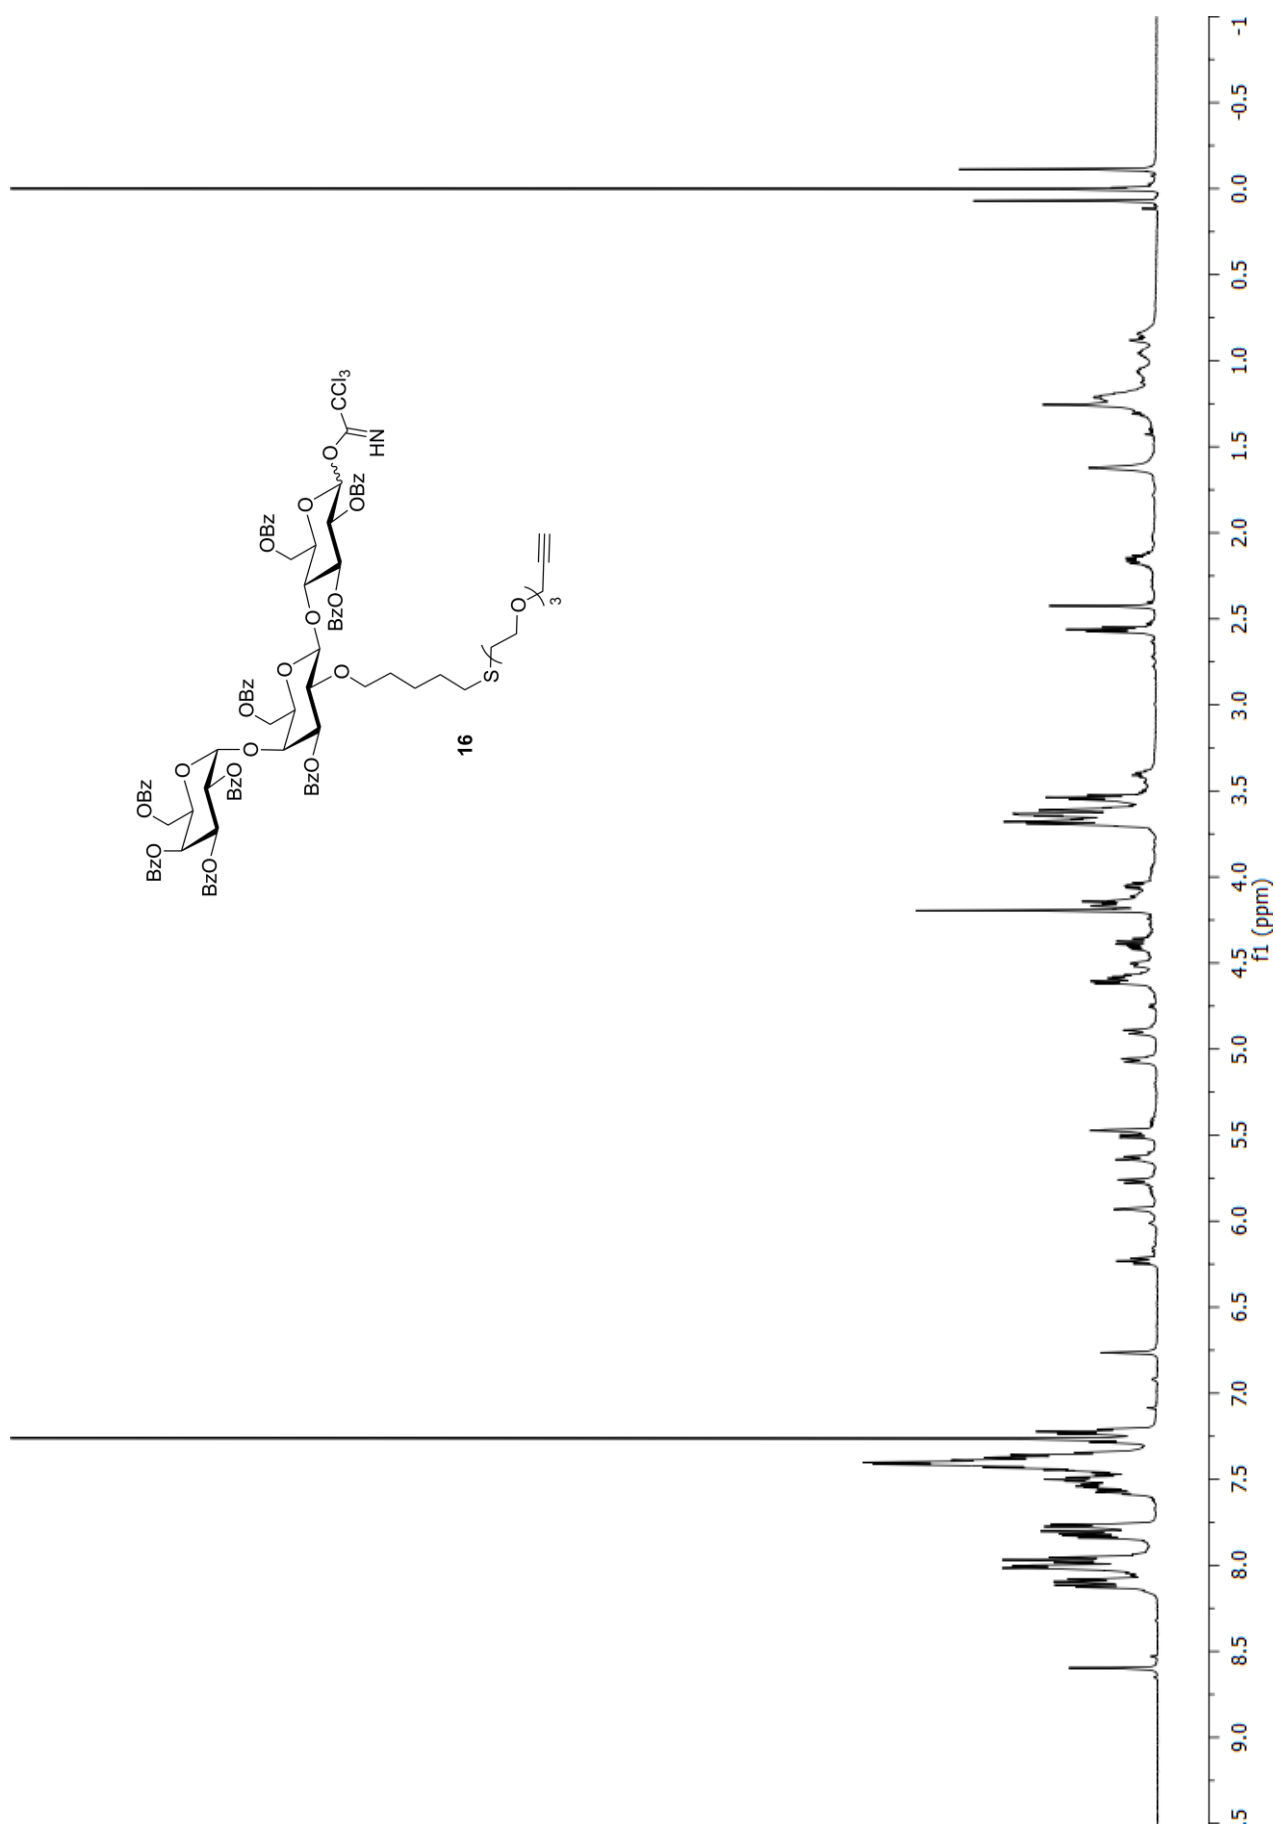

## SUPPORTING INFORMATION

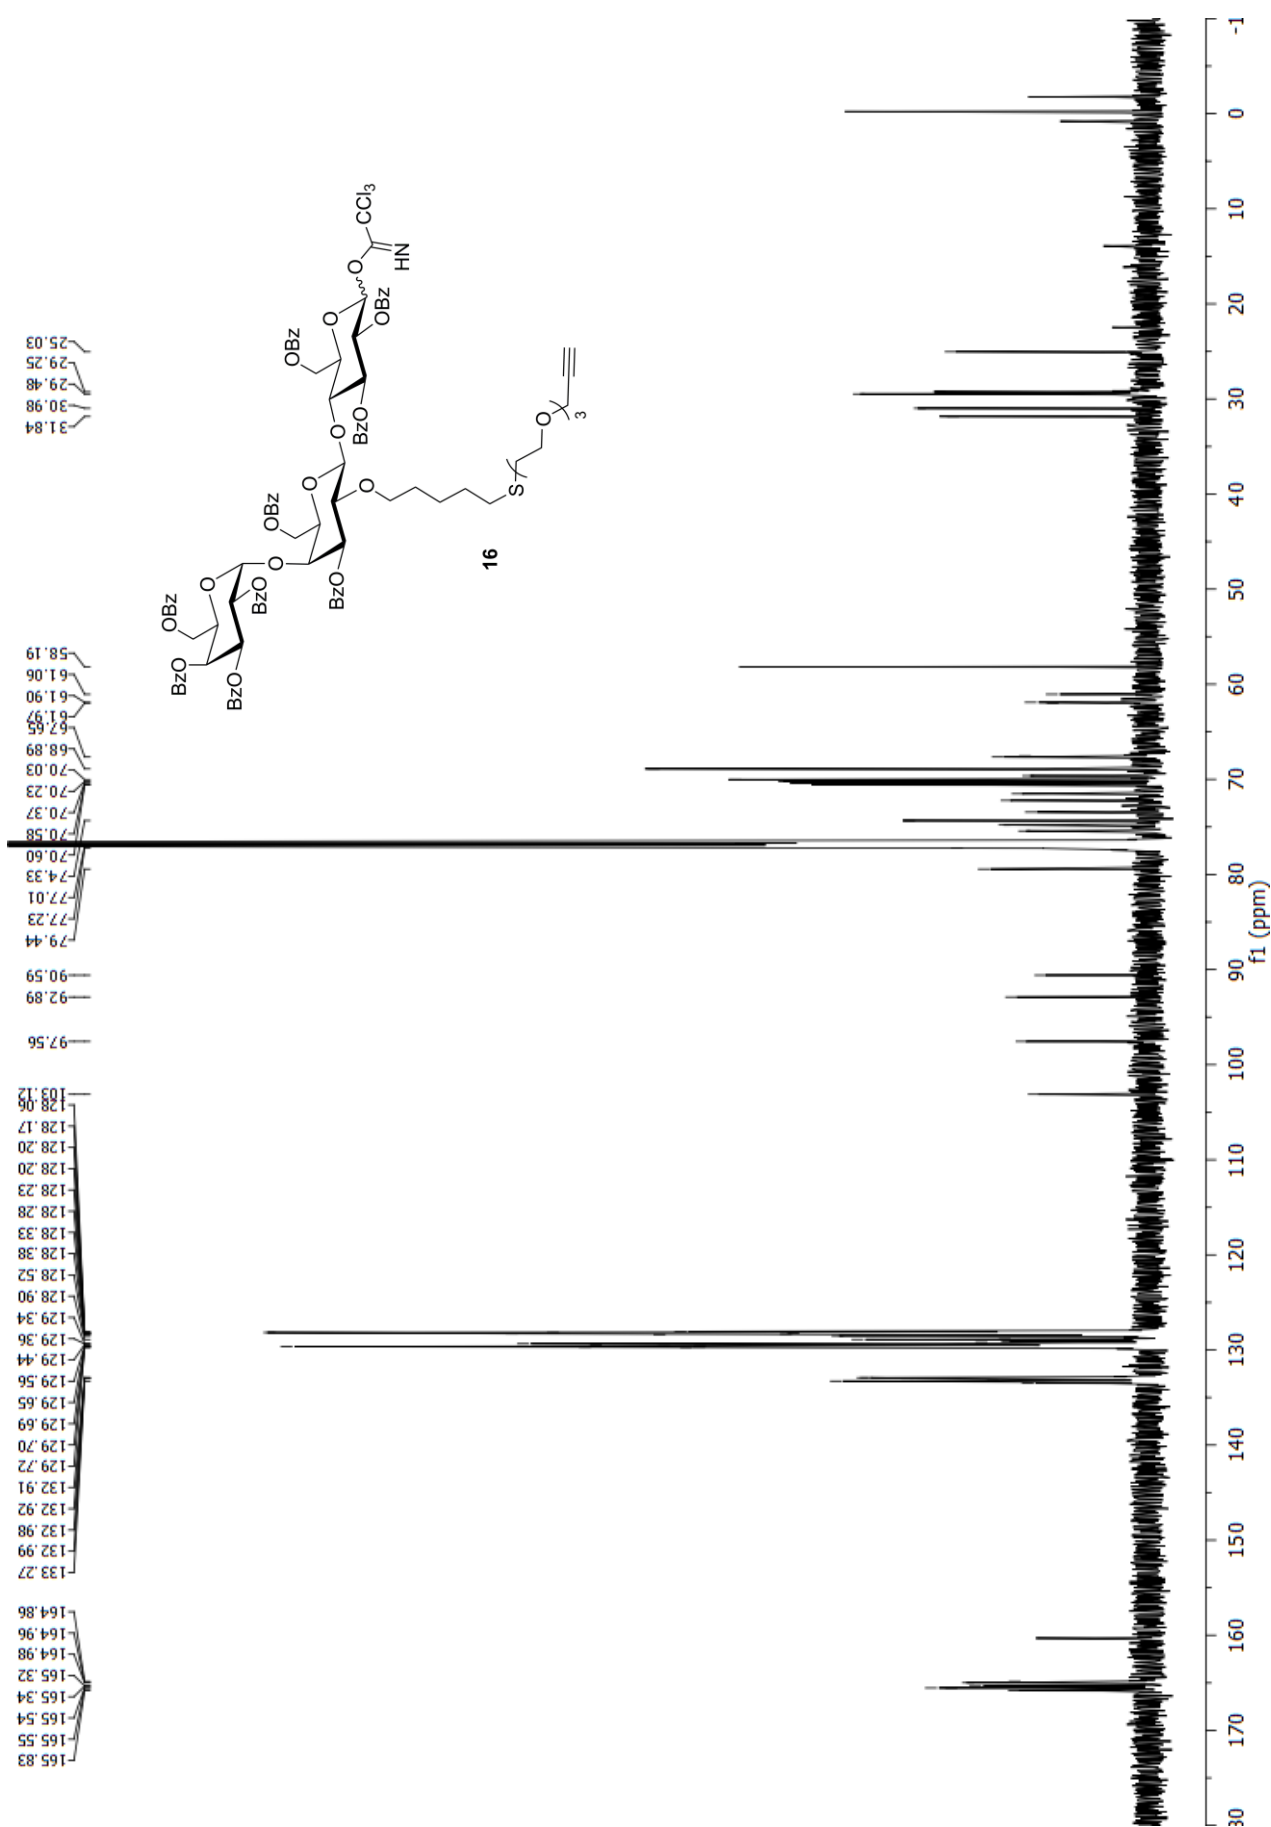



## SUPPORTING INFORMATION

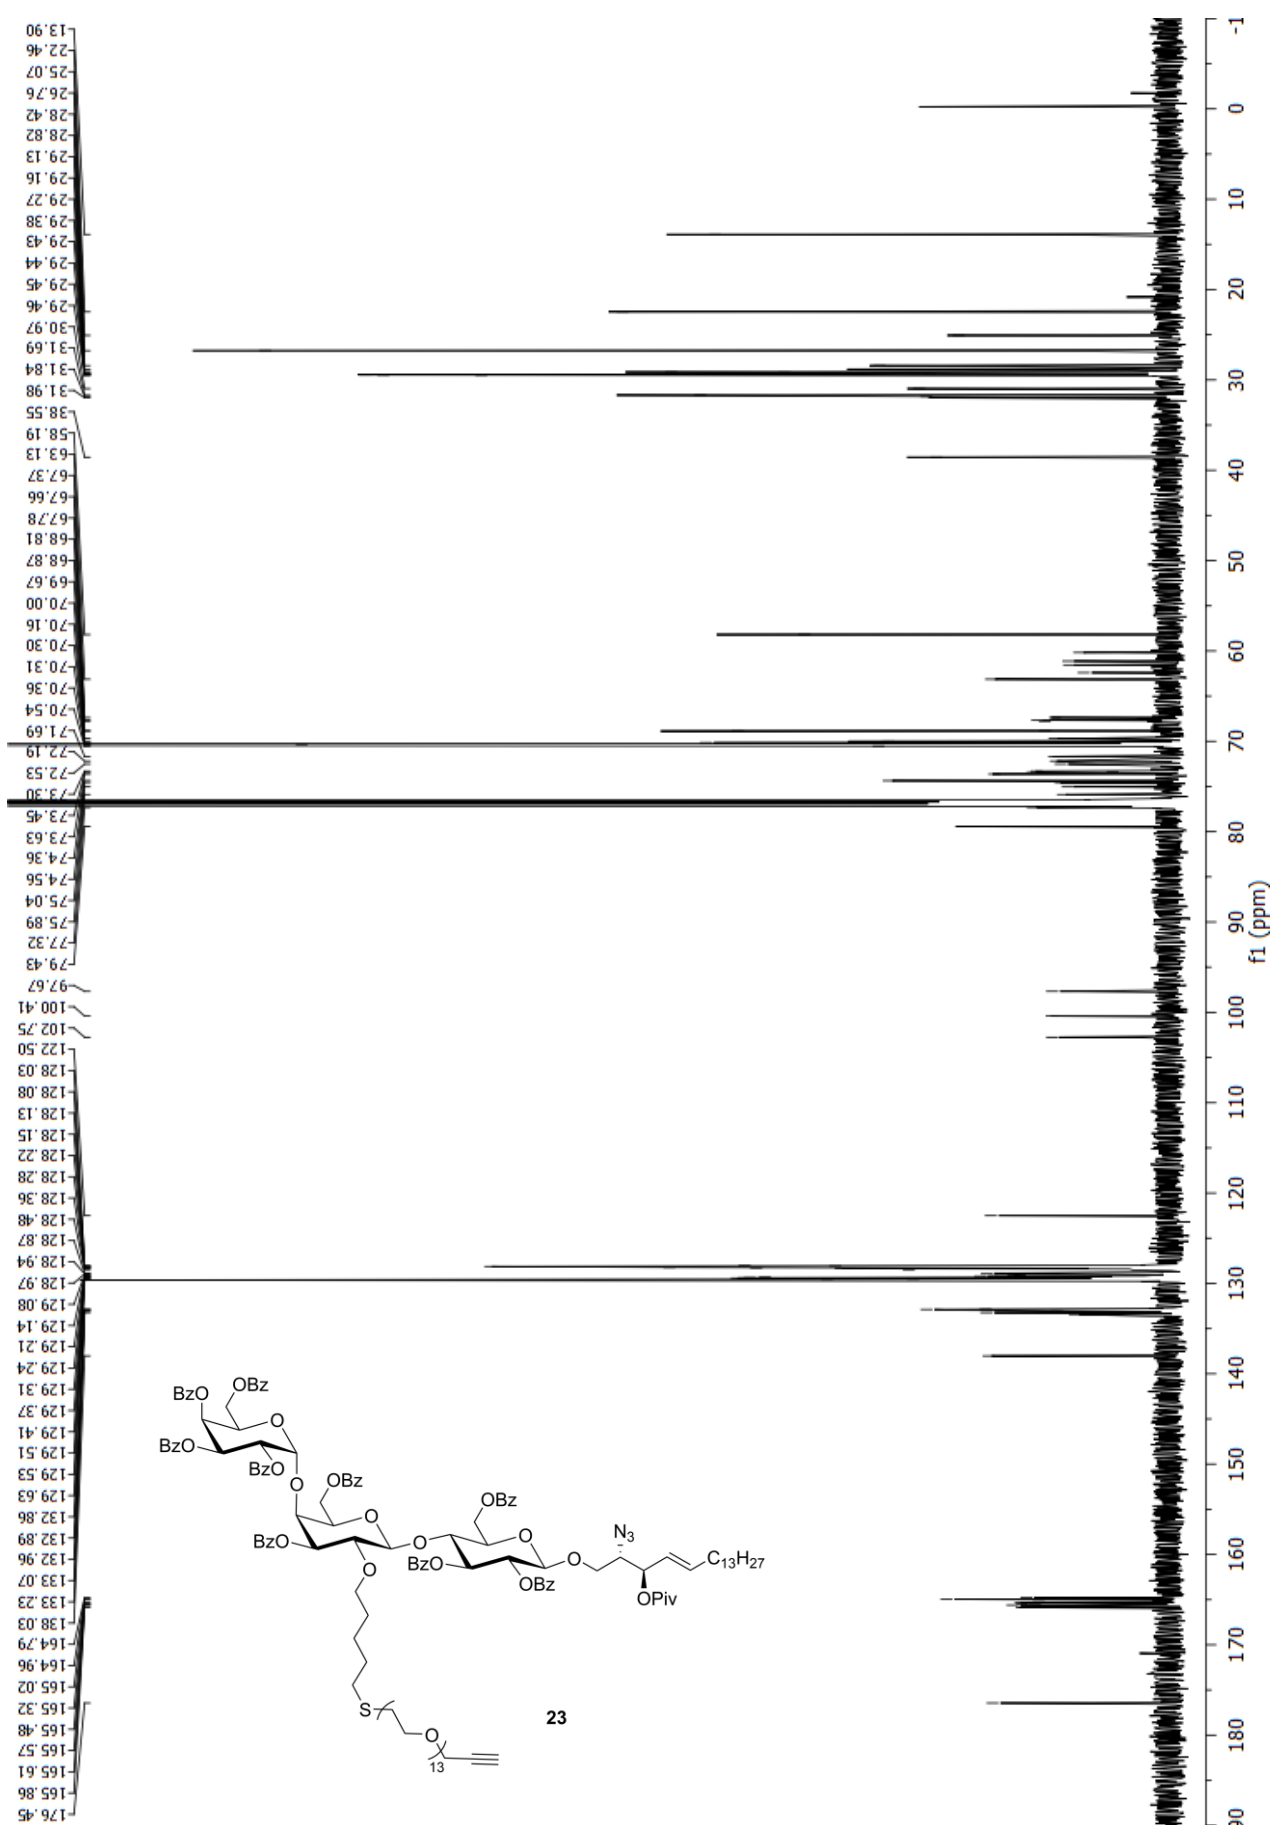

## SUPPORTING INFORMATION

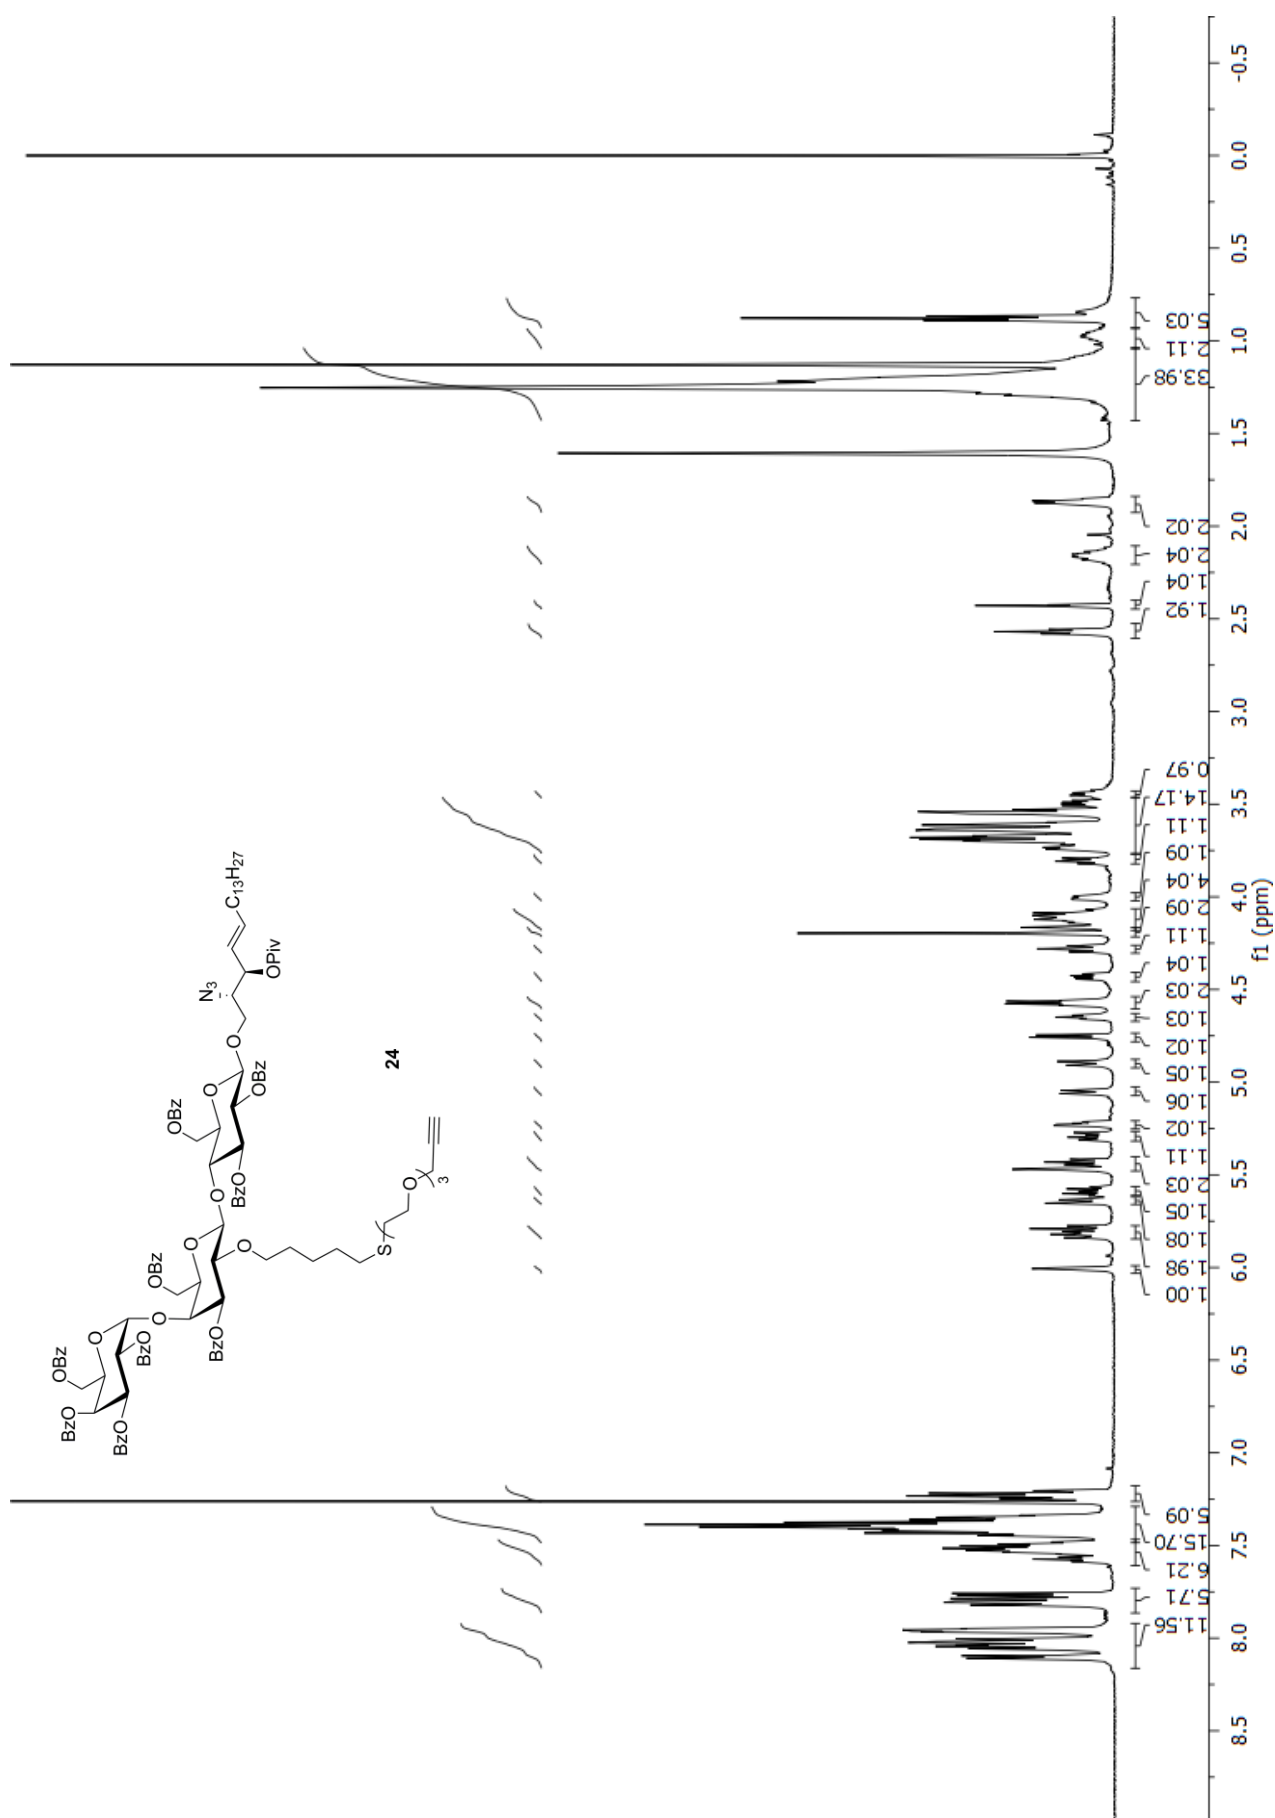





## SUPPORTING INFORMATION

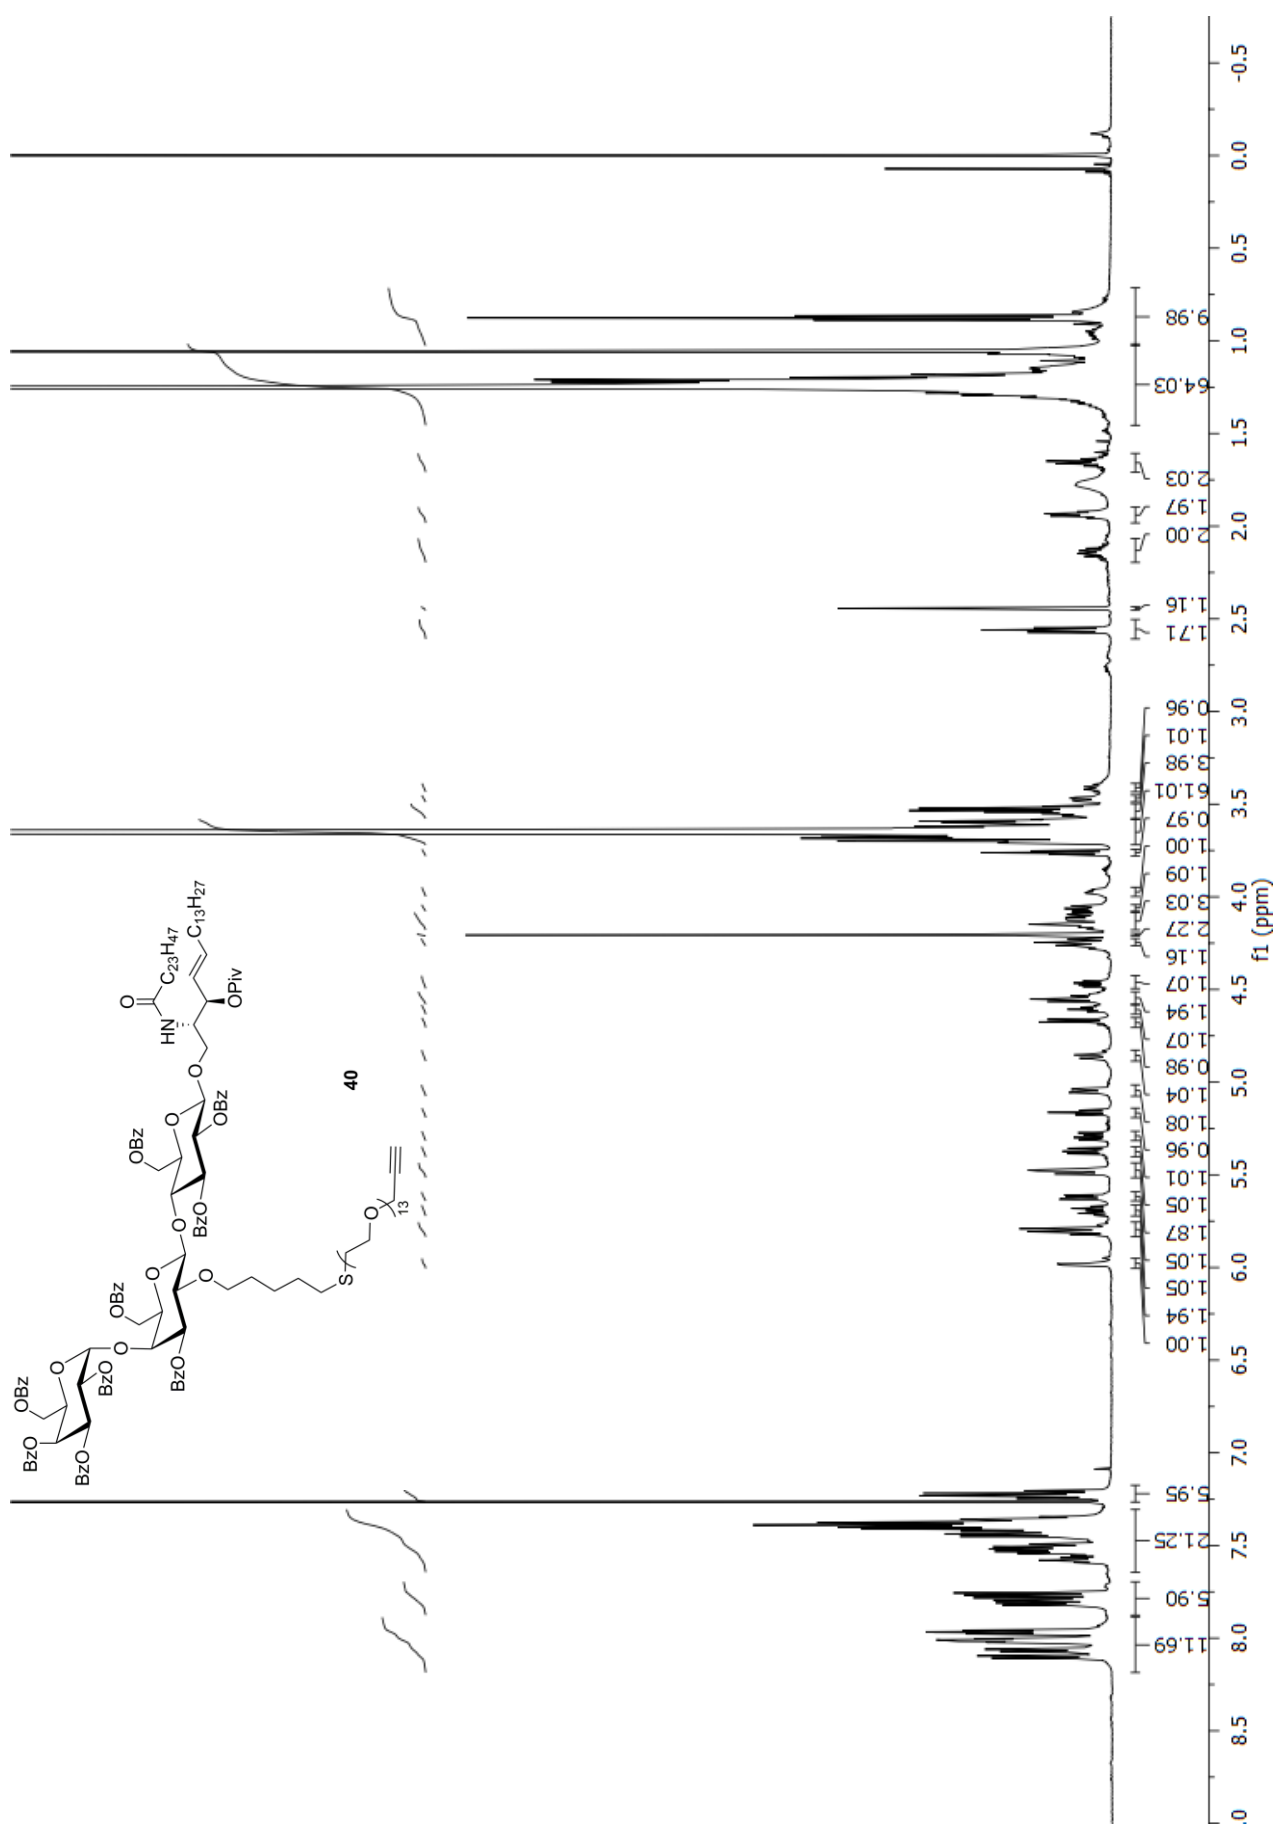

## SUPPORTING INFORMATION

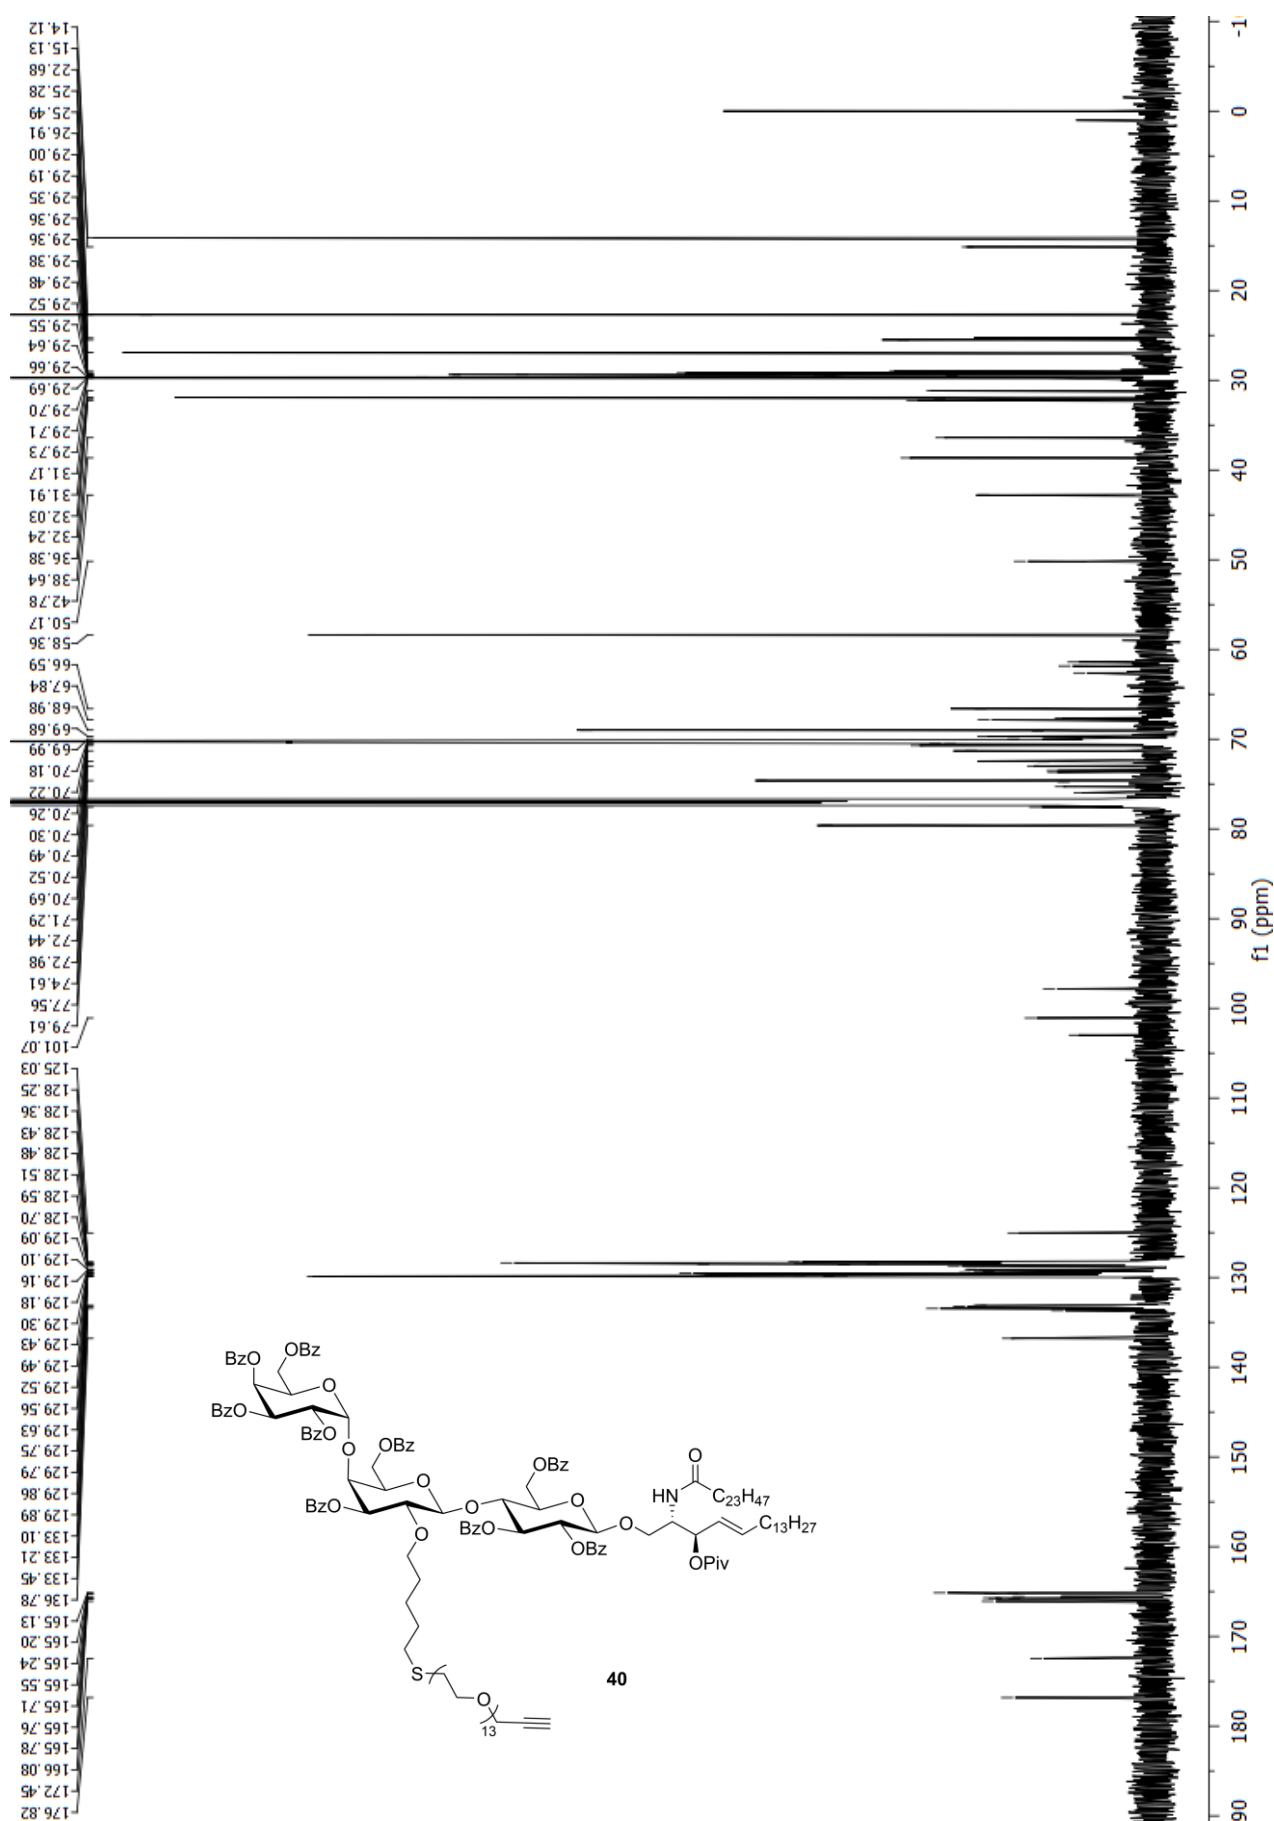

## SUPPORTING INFORMATION

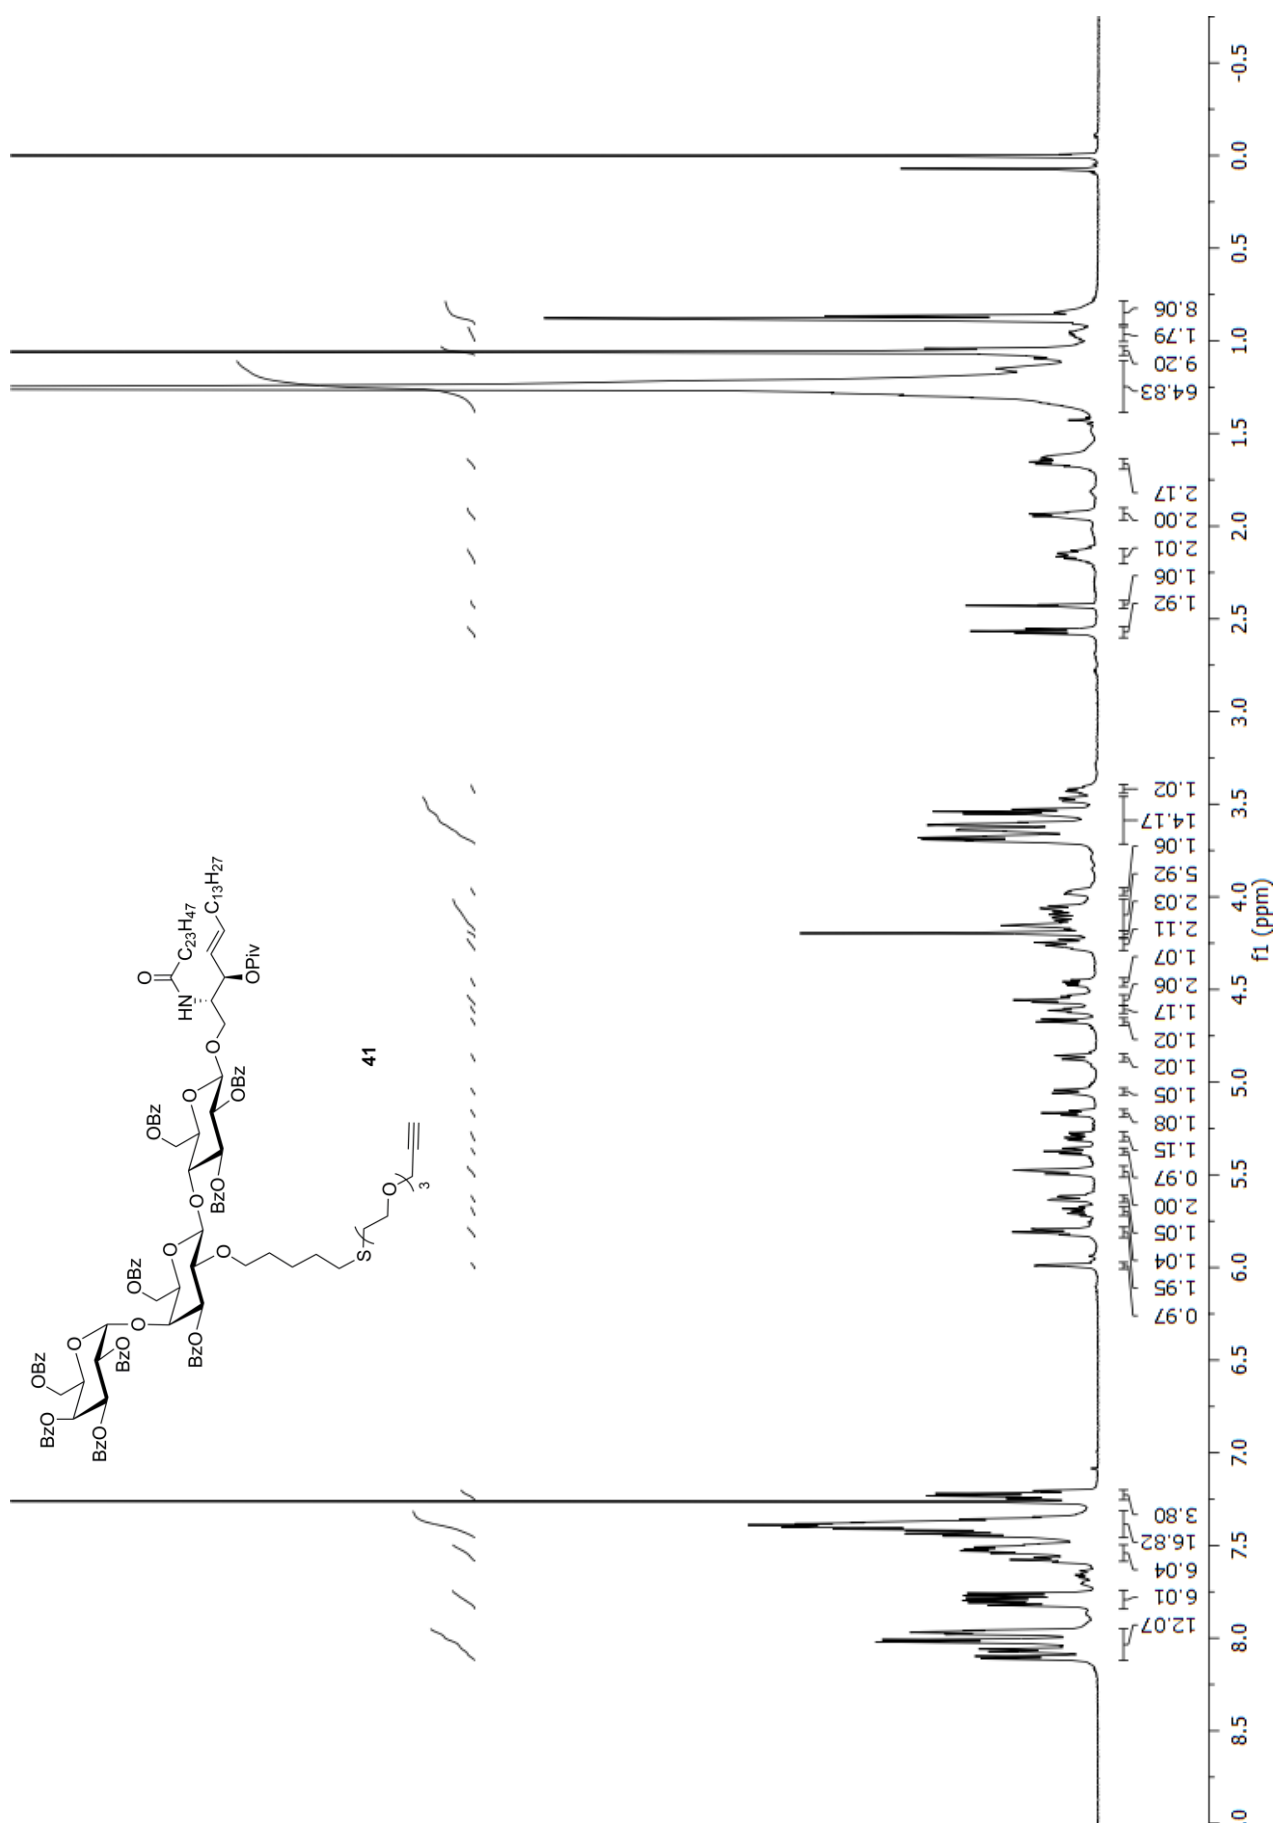

## SUPPORTING INFORMATION

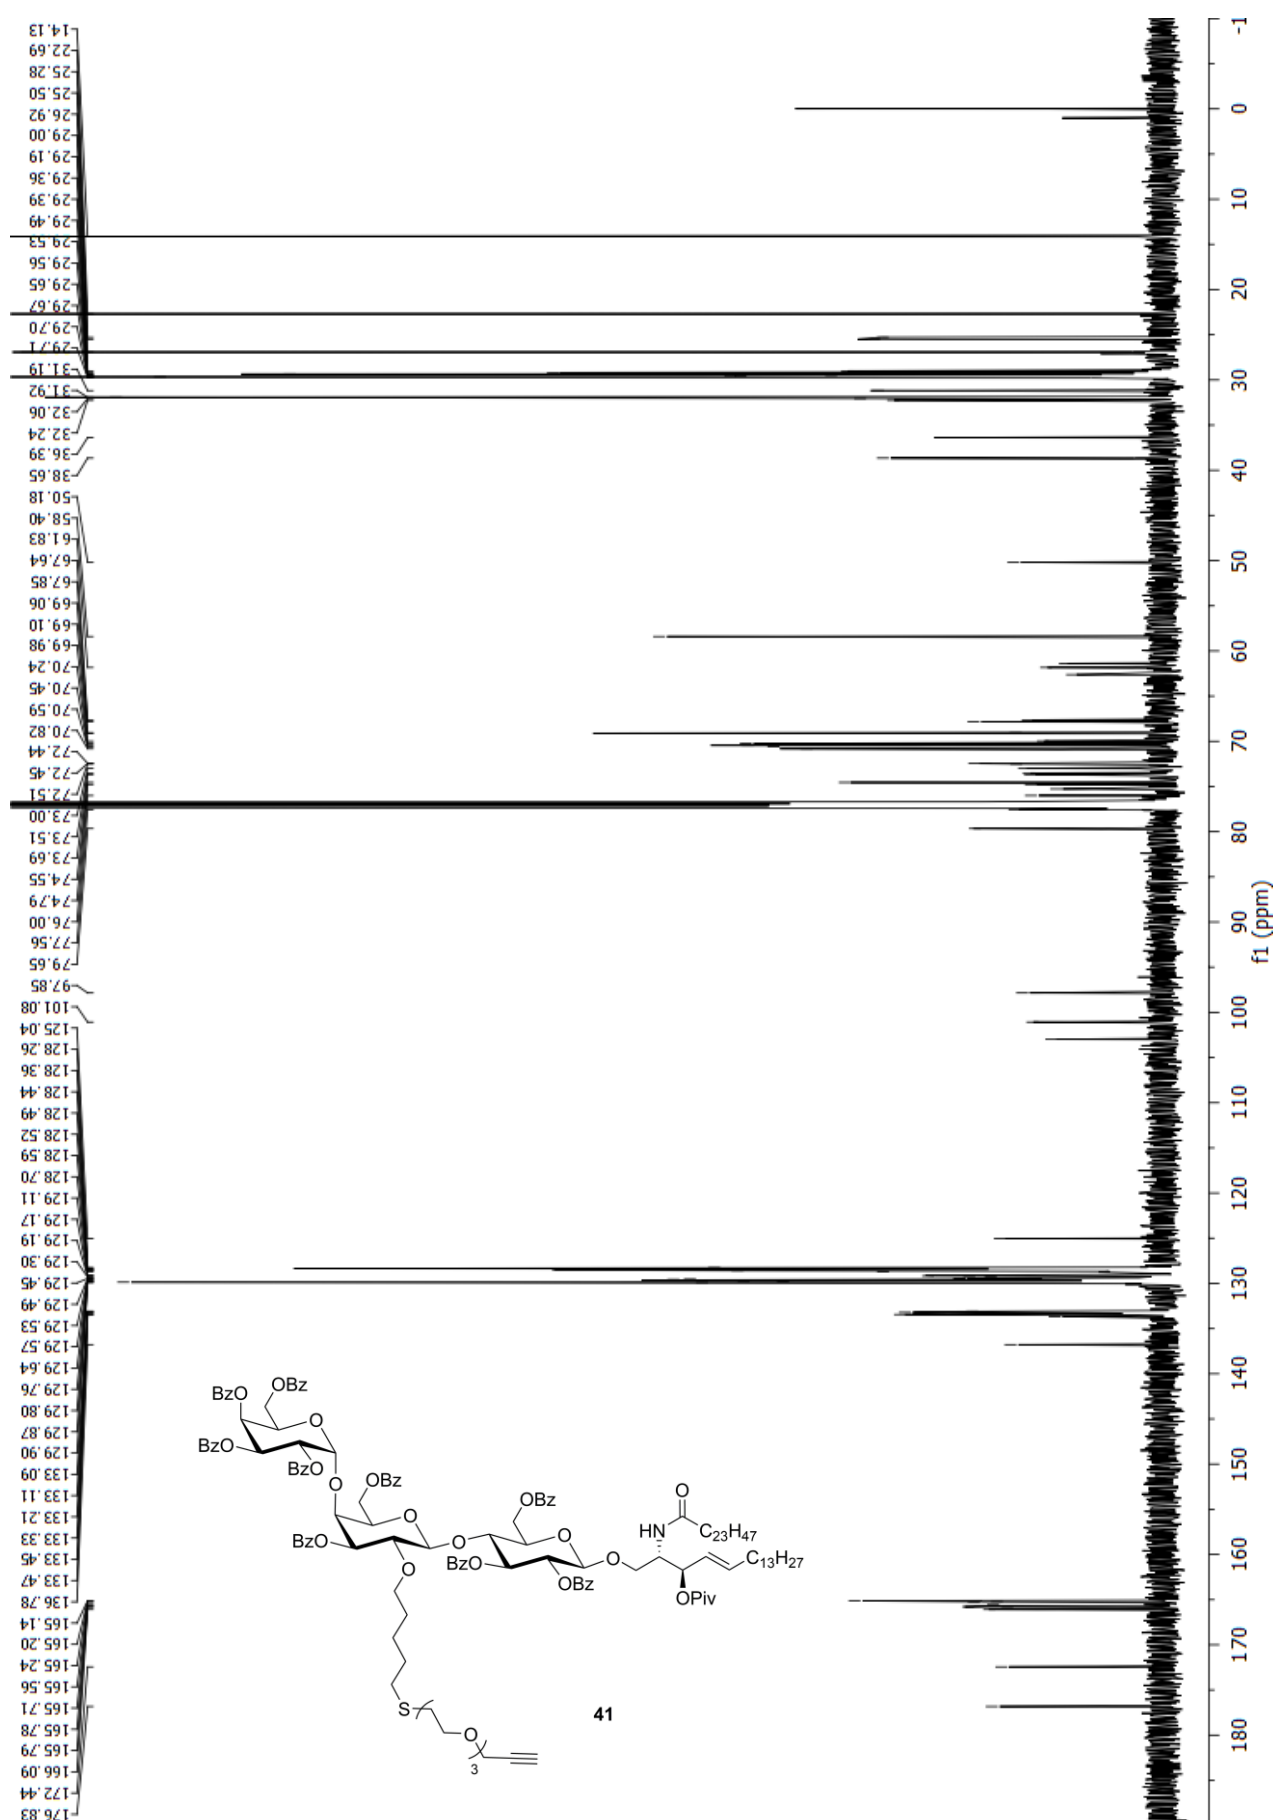

## SUPPORTING INFORMATION

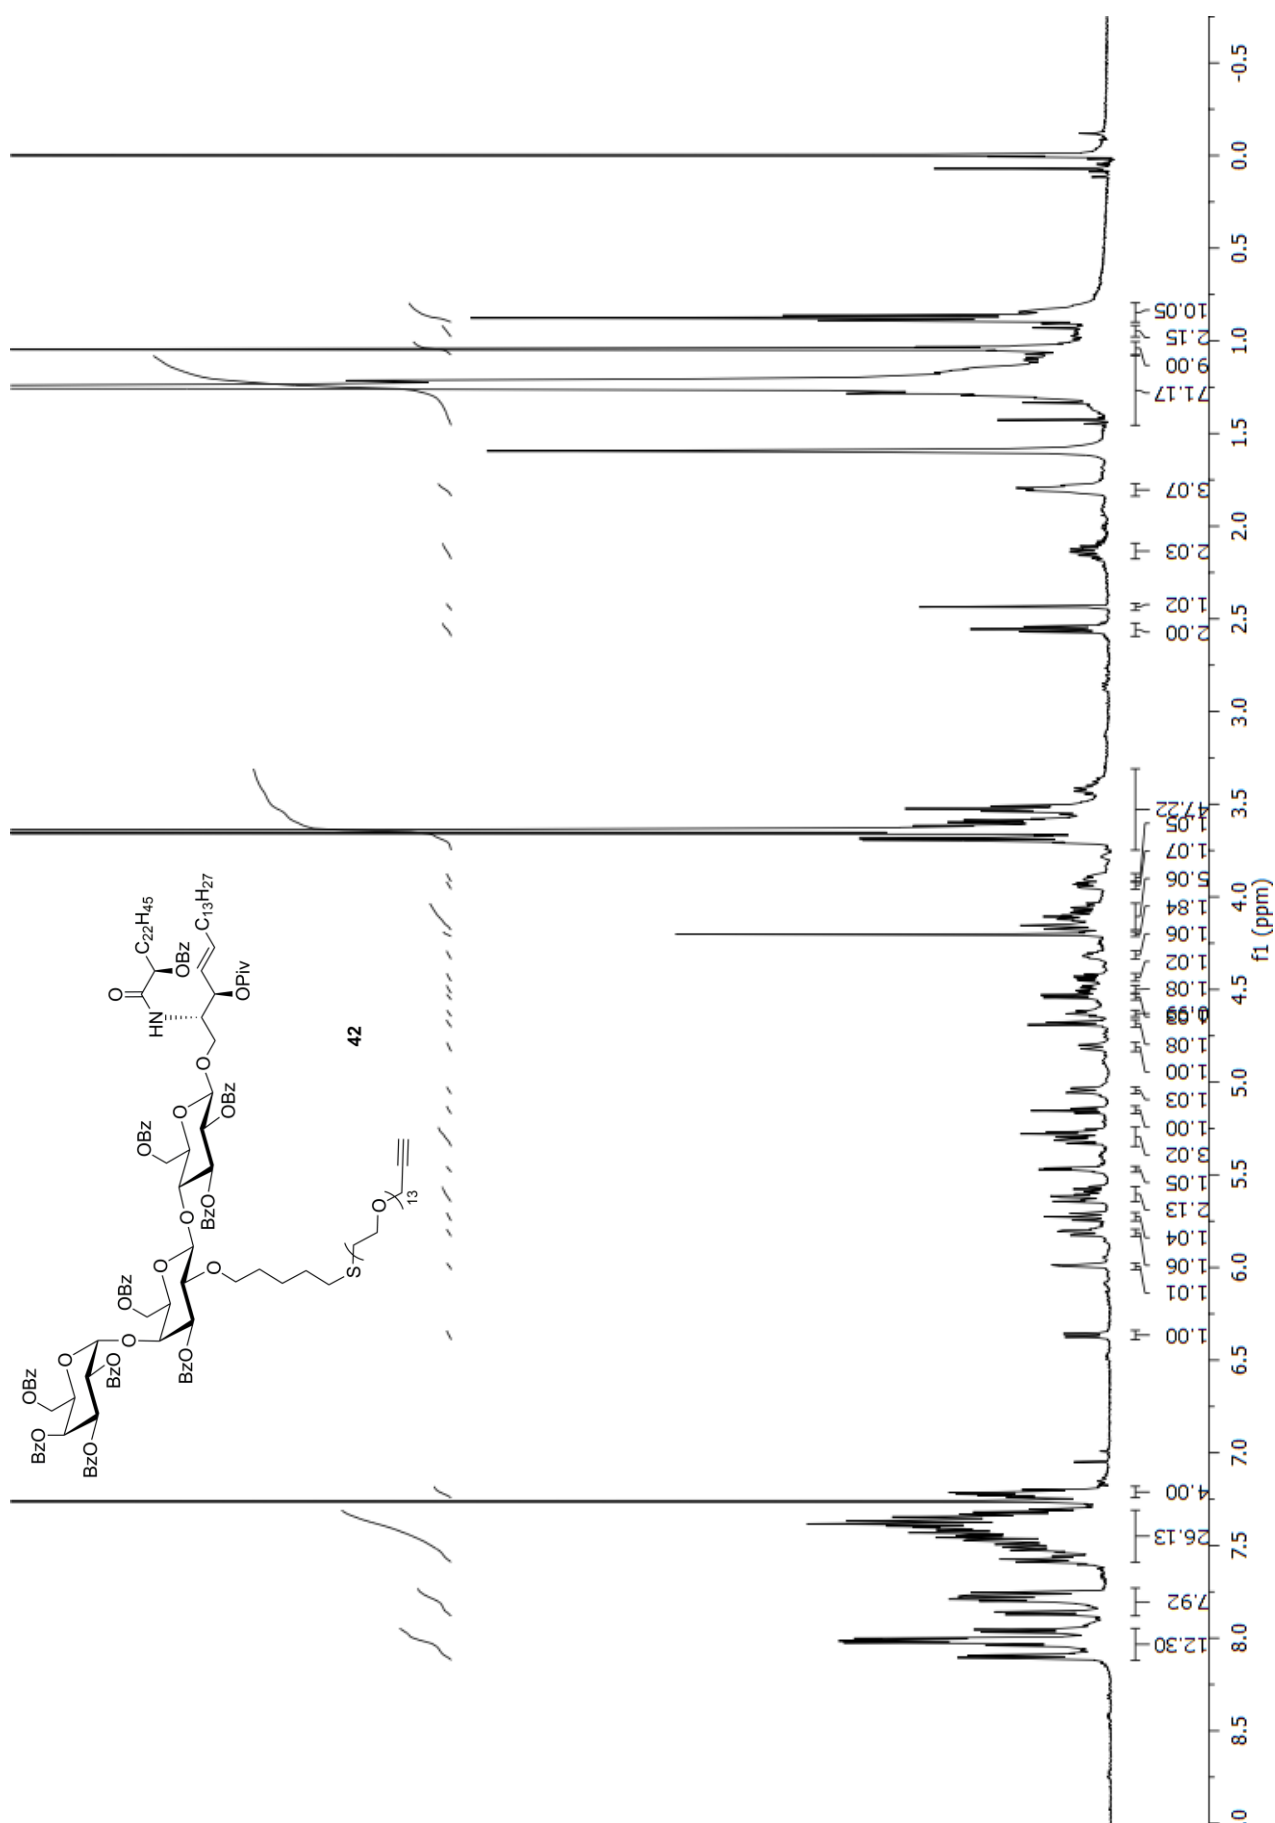

## SUPPORTING INFORMATION

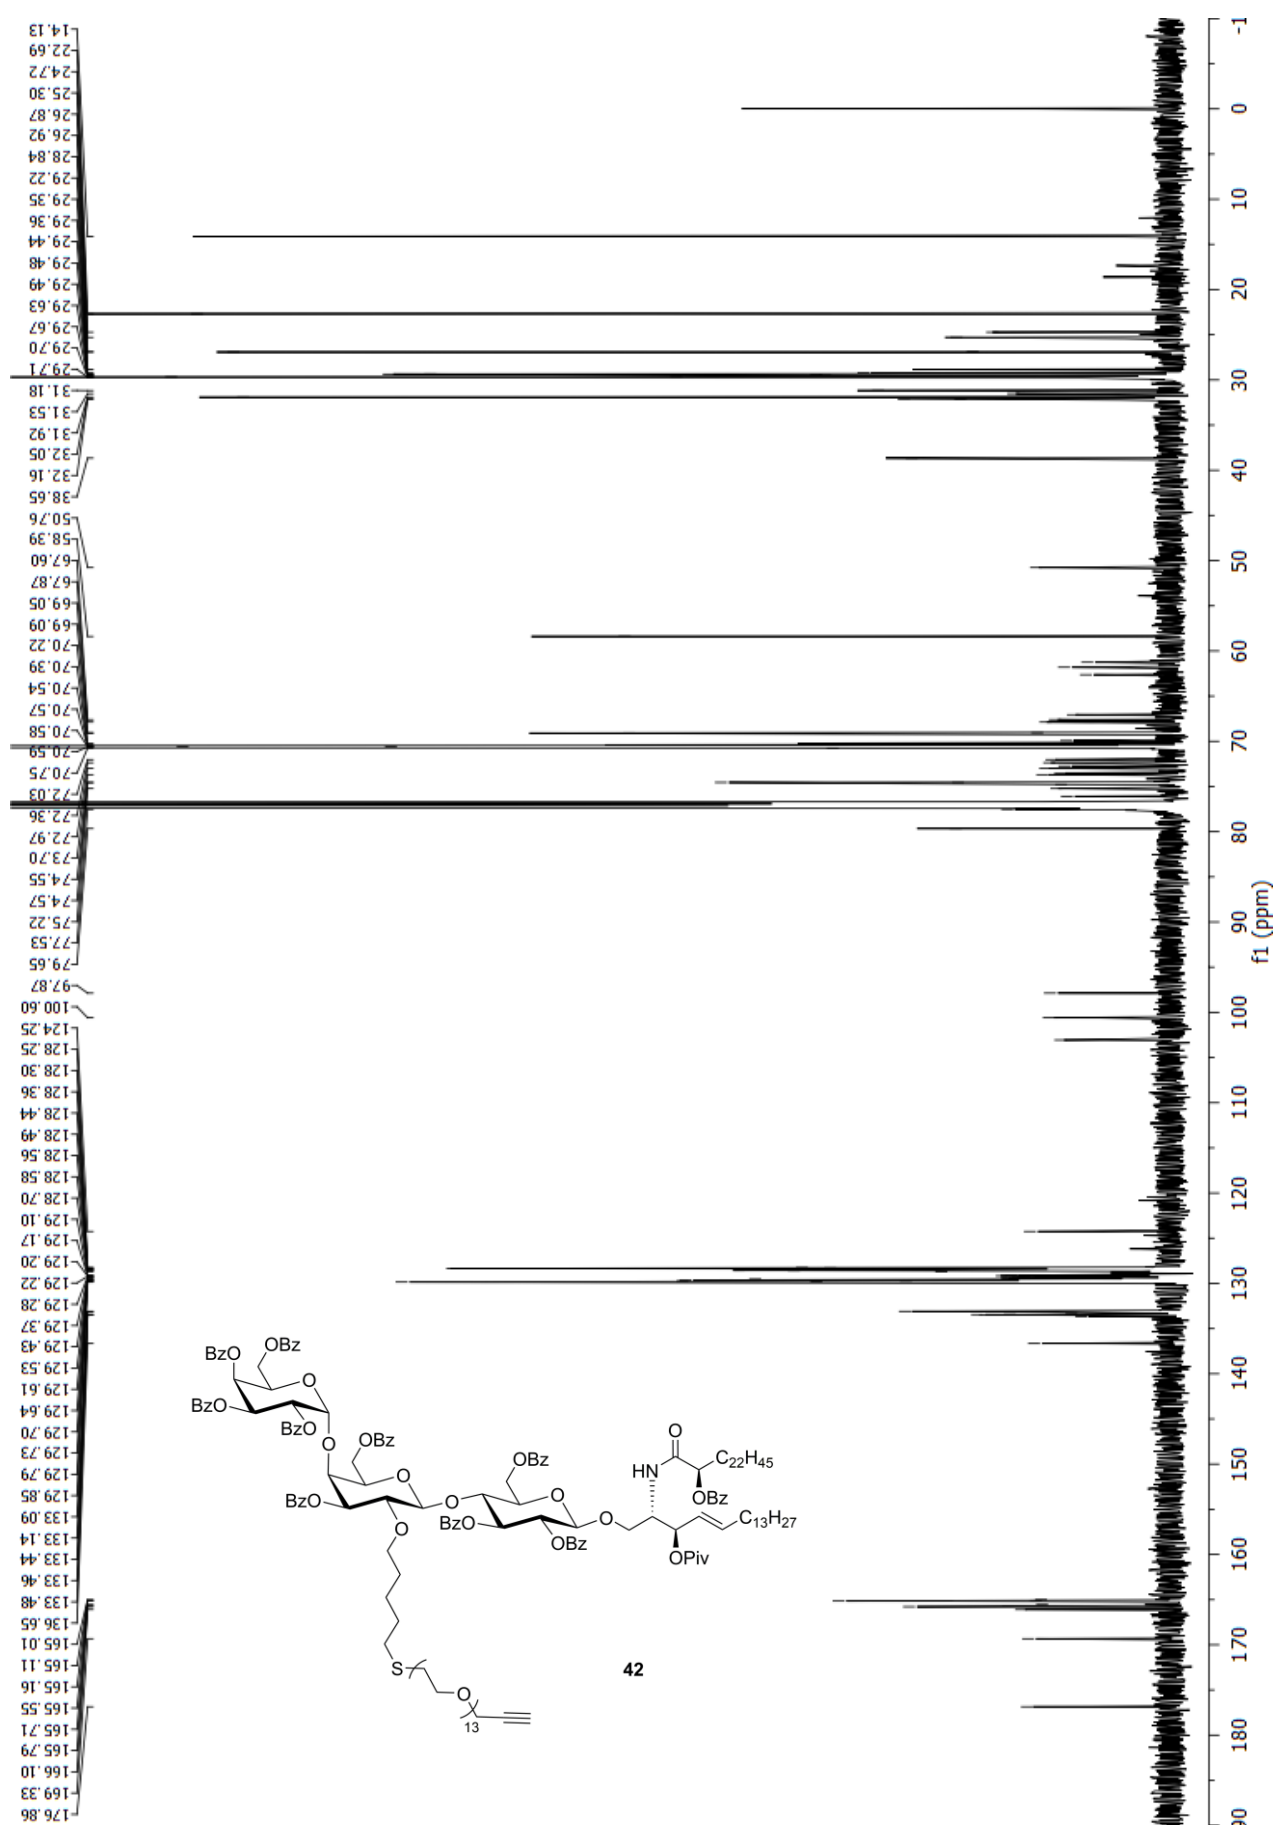



## SUPPORTING INFORMATION

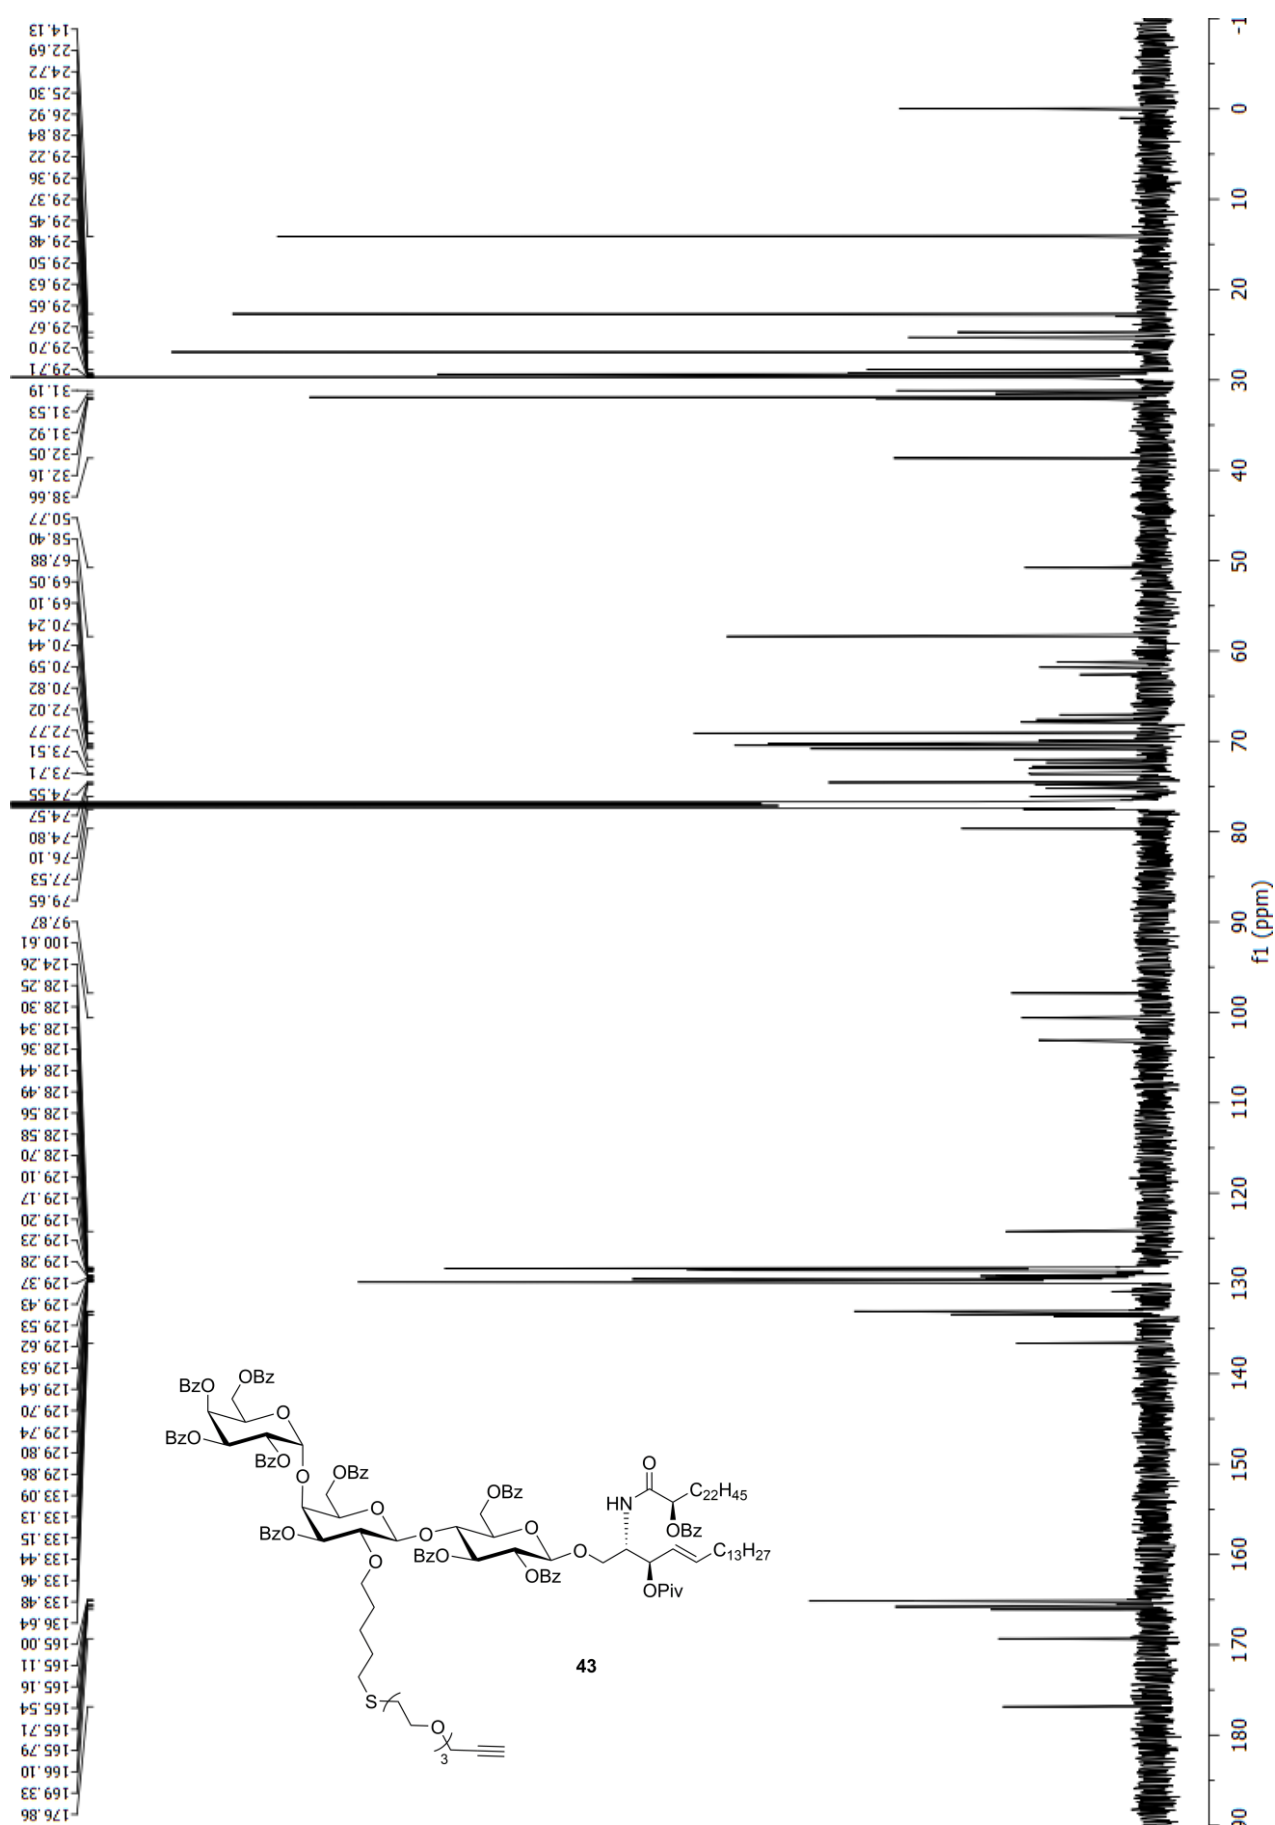



## SUPPORTING INFORMATION

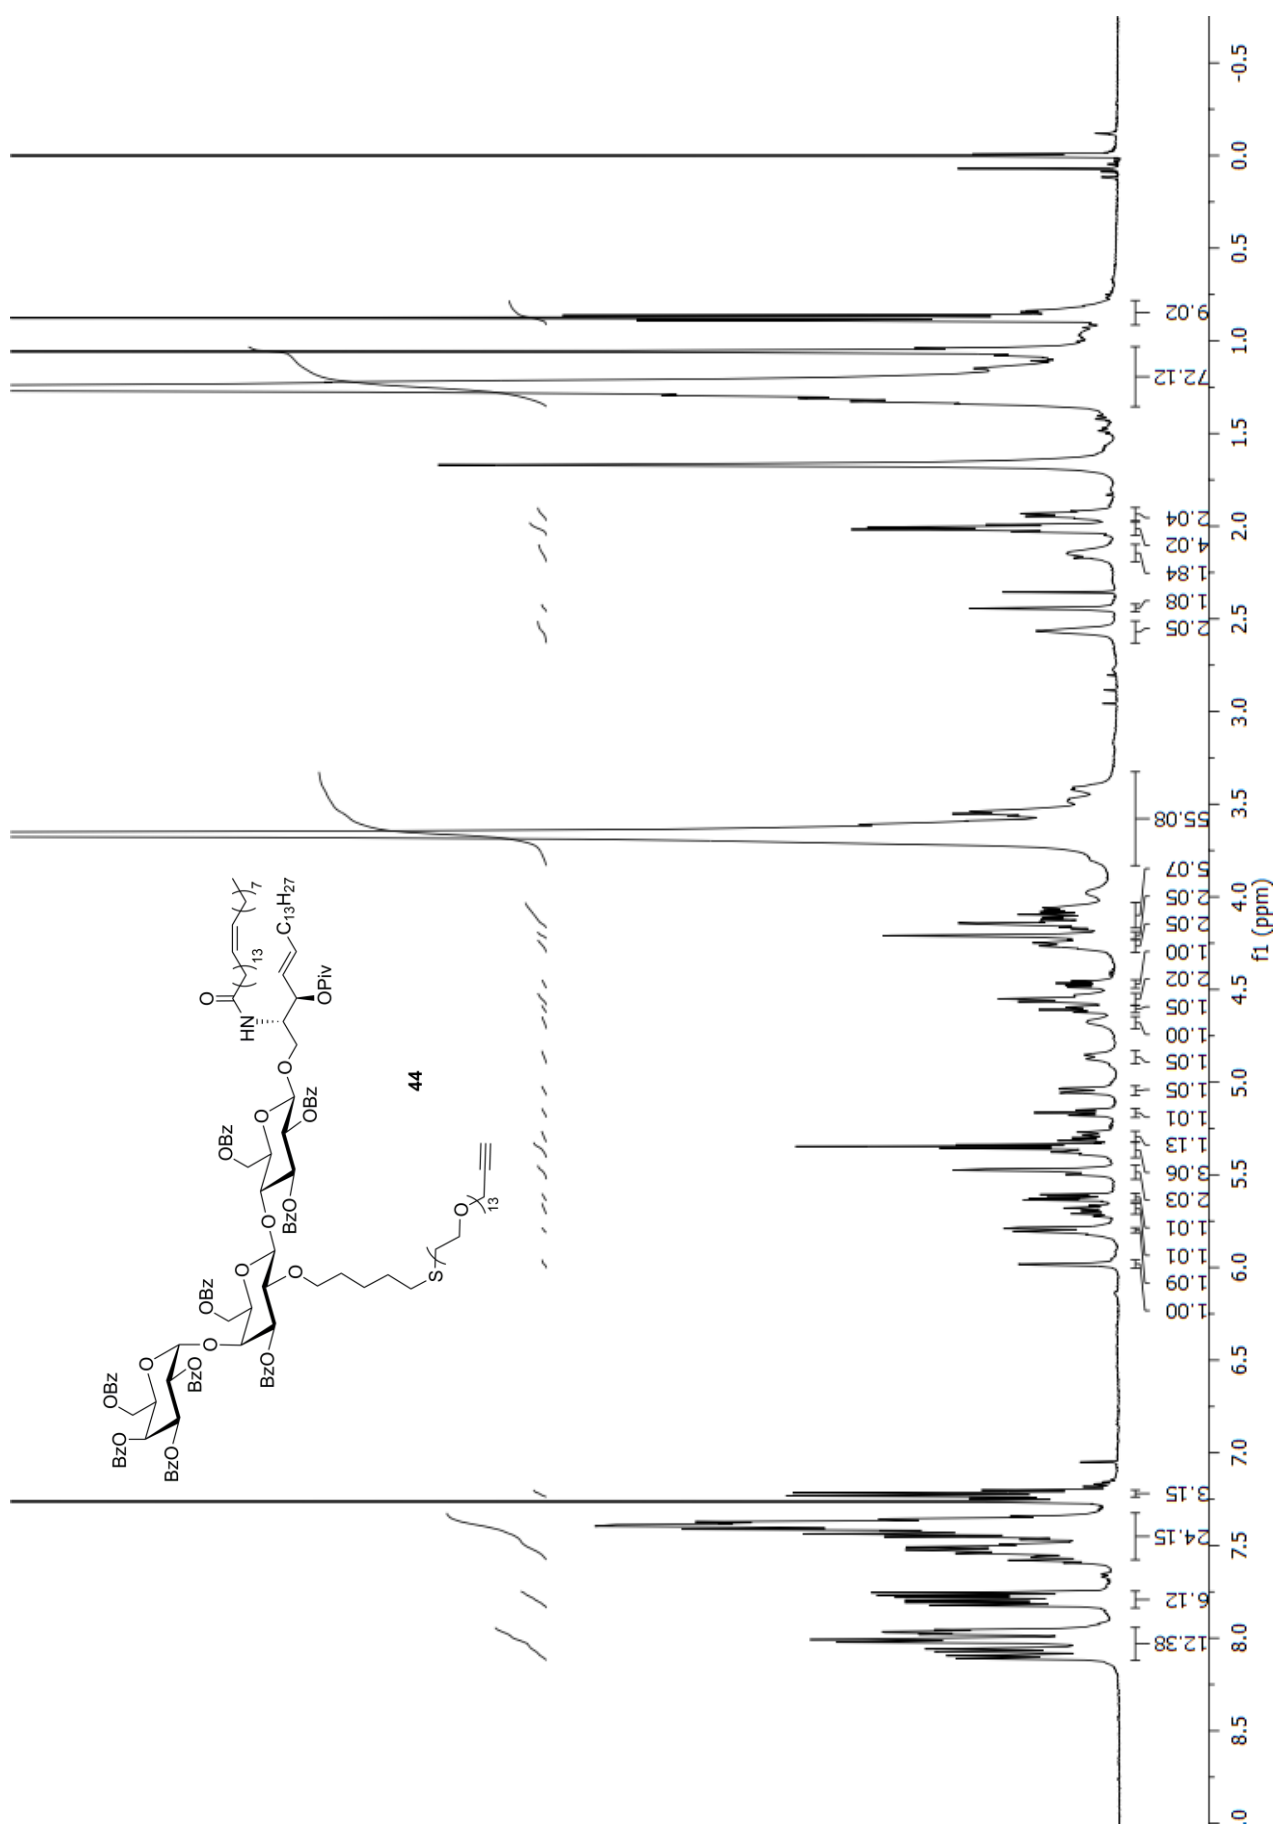

## SUPPORTING INFORMATION

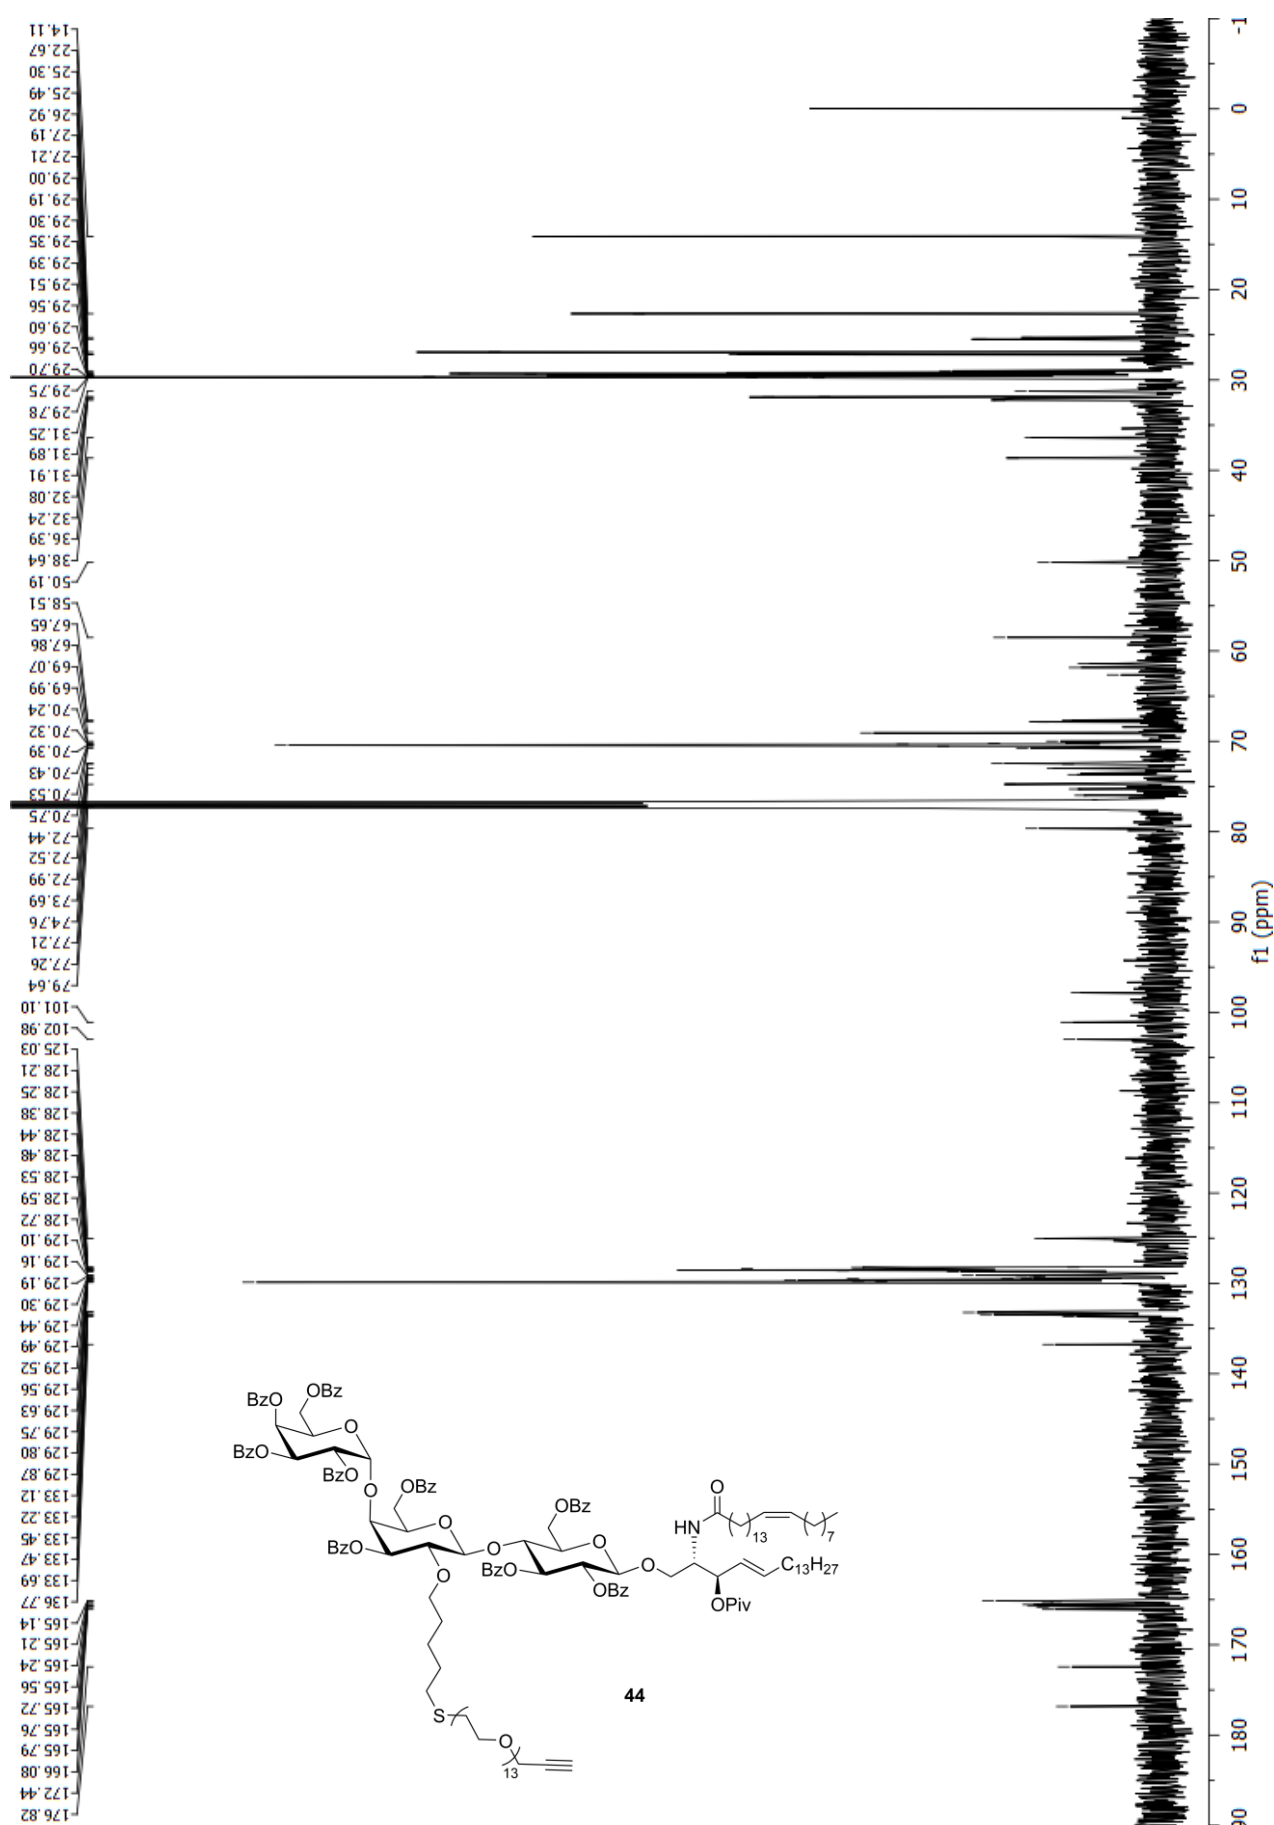

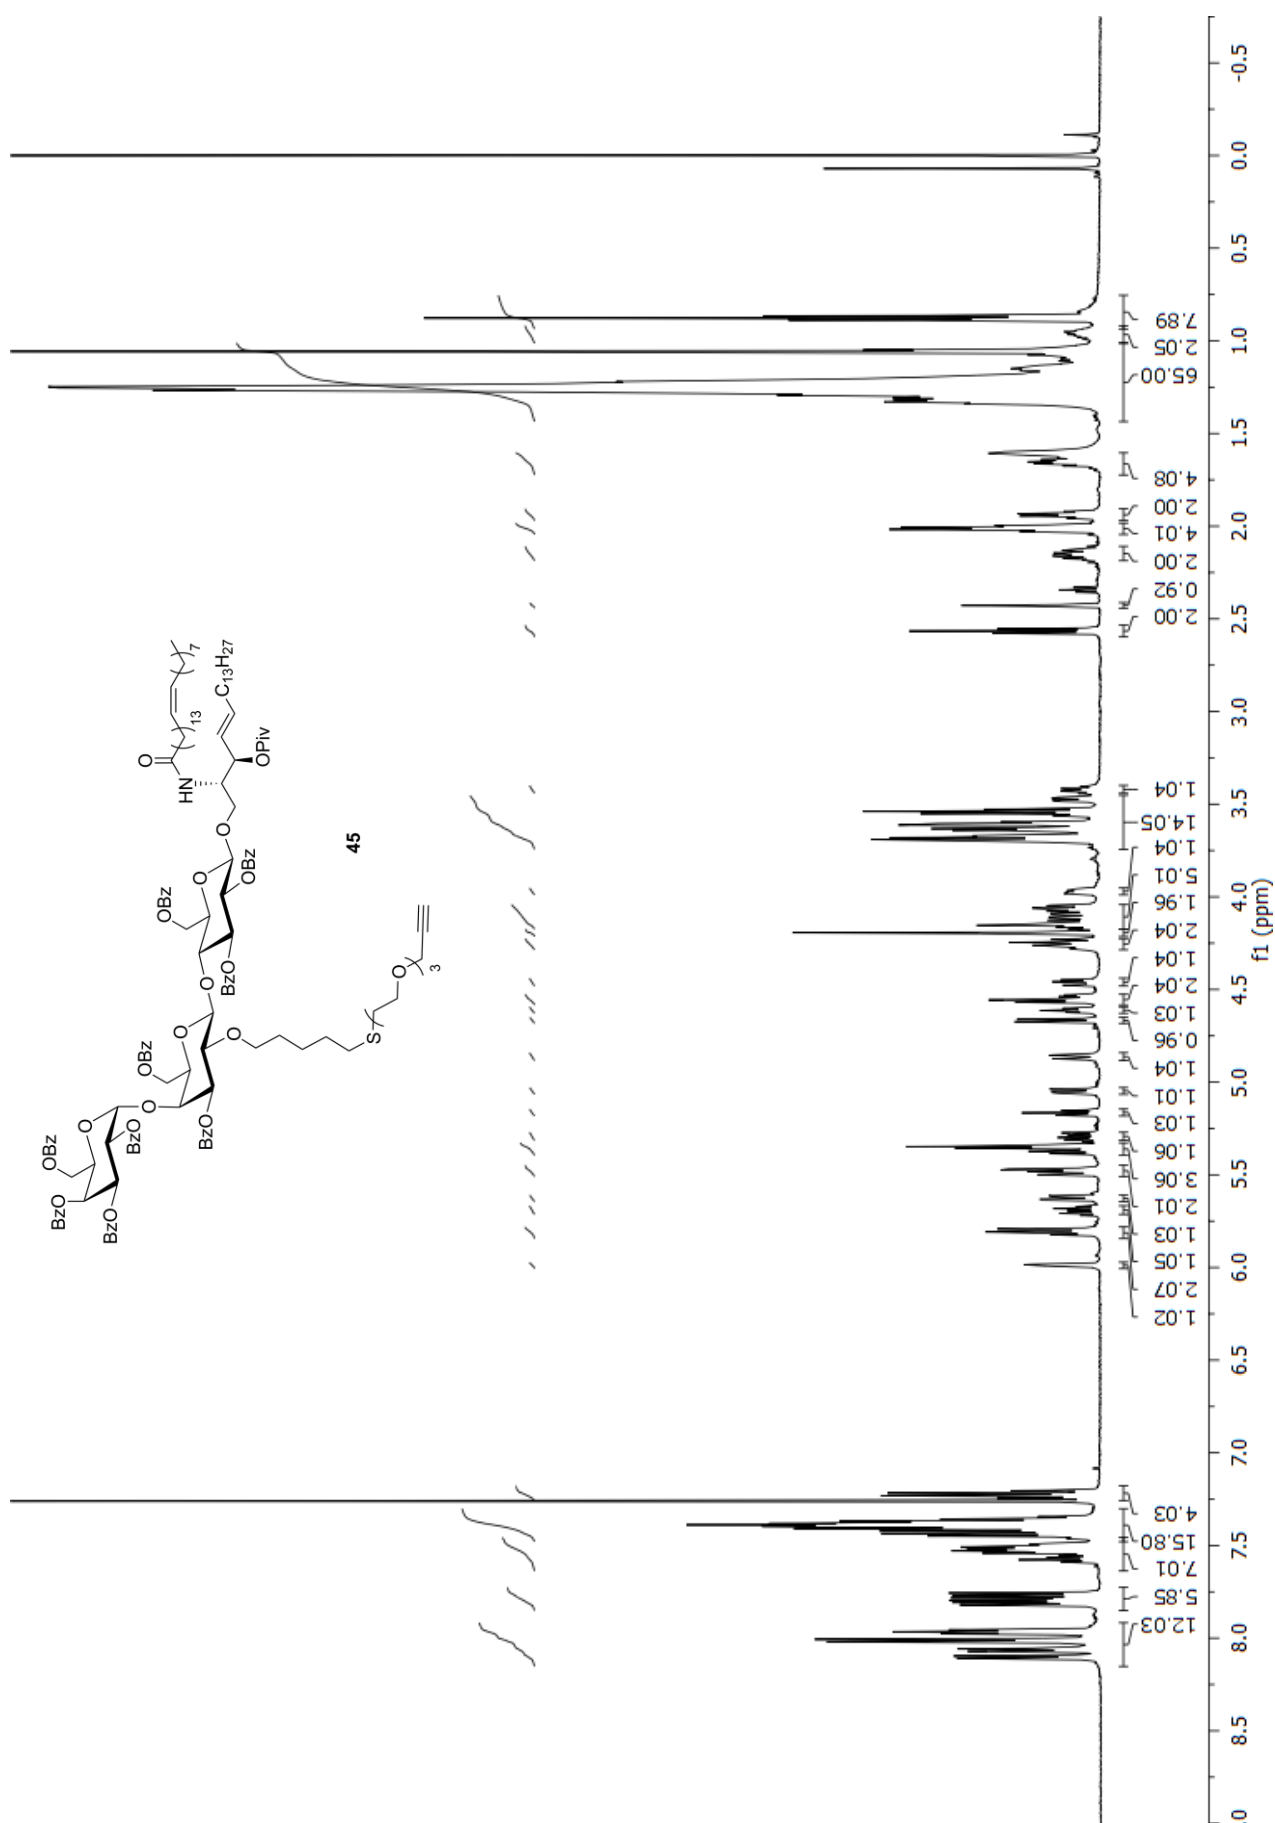

## SUPPORTING INFORMATION

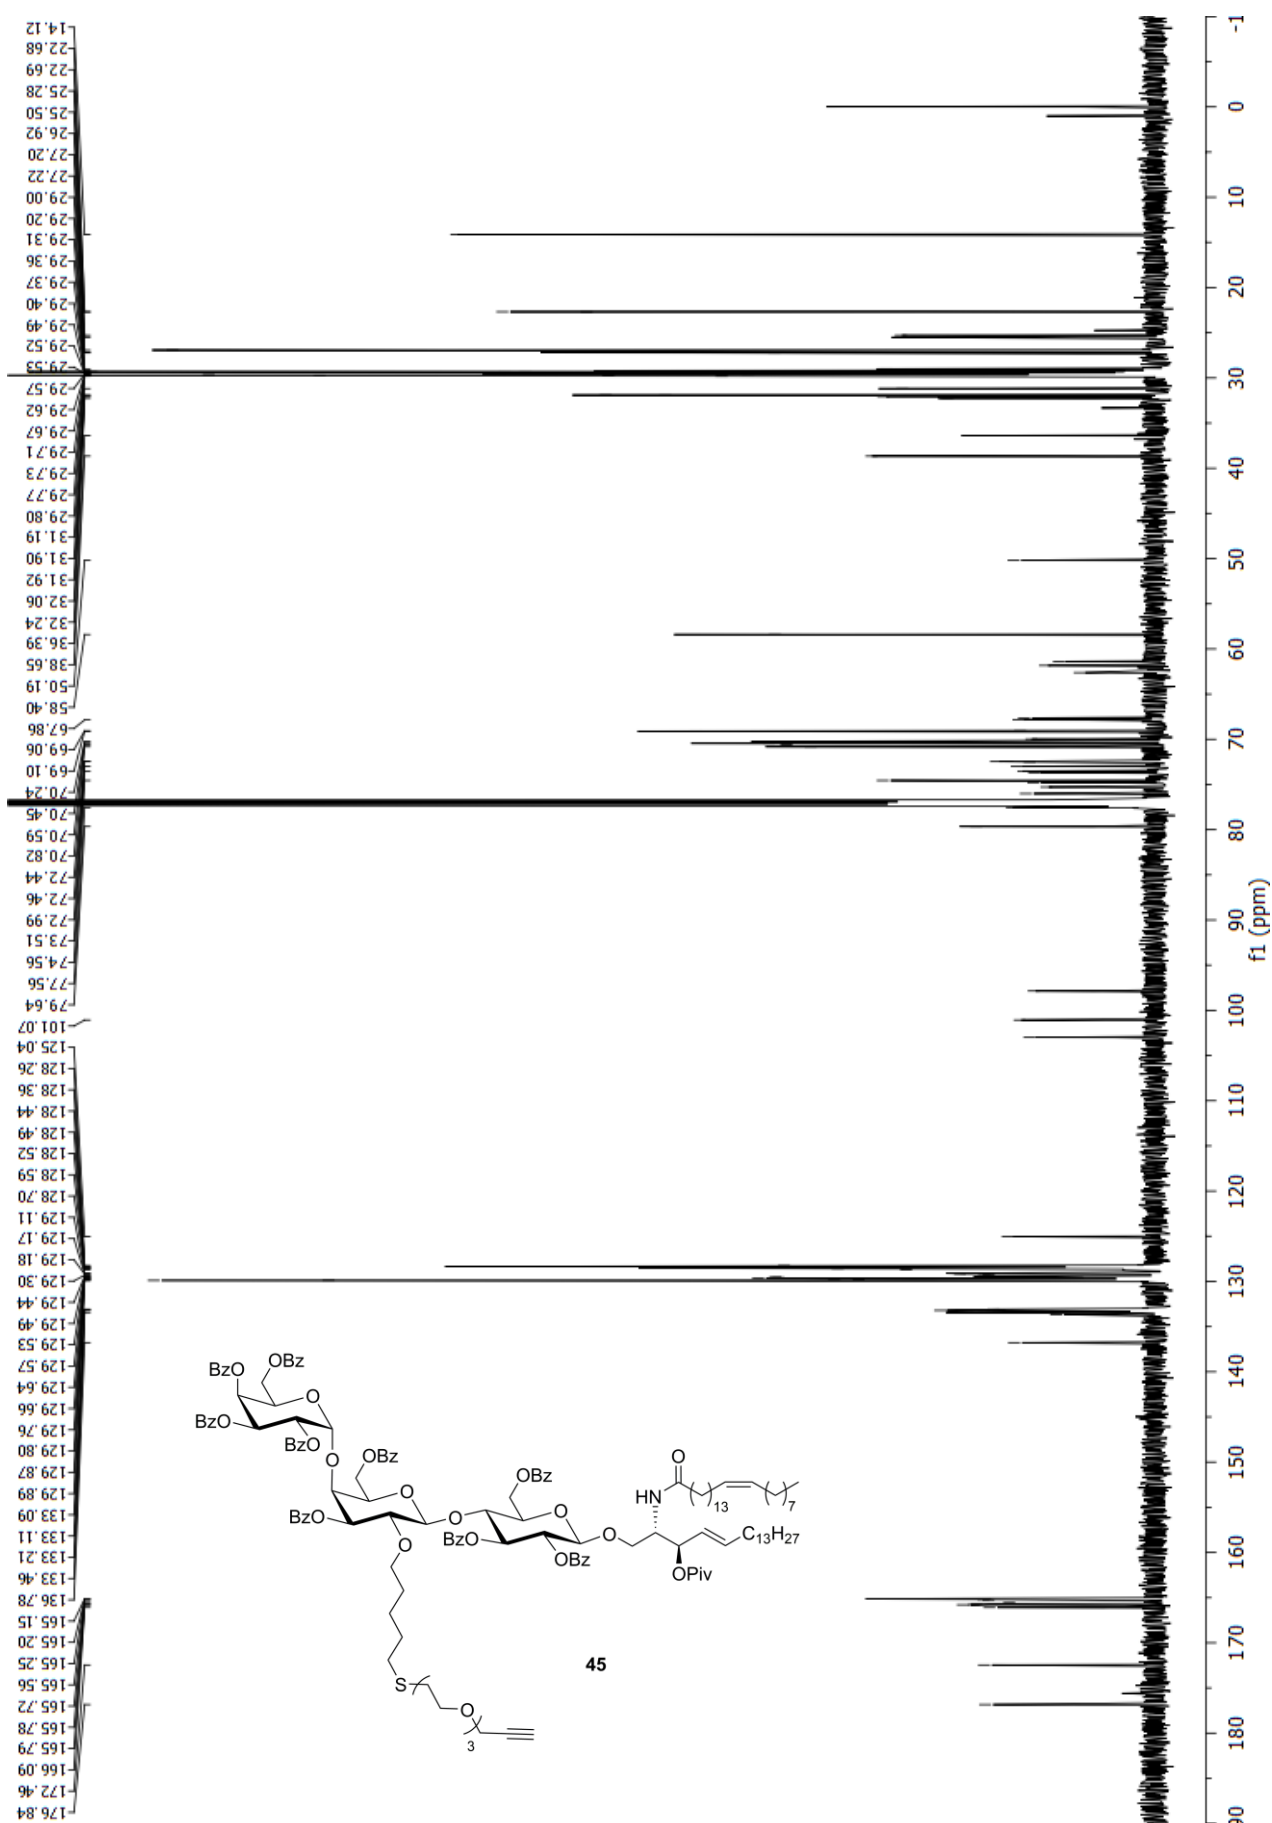



## SUPPORTING INFORMATION

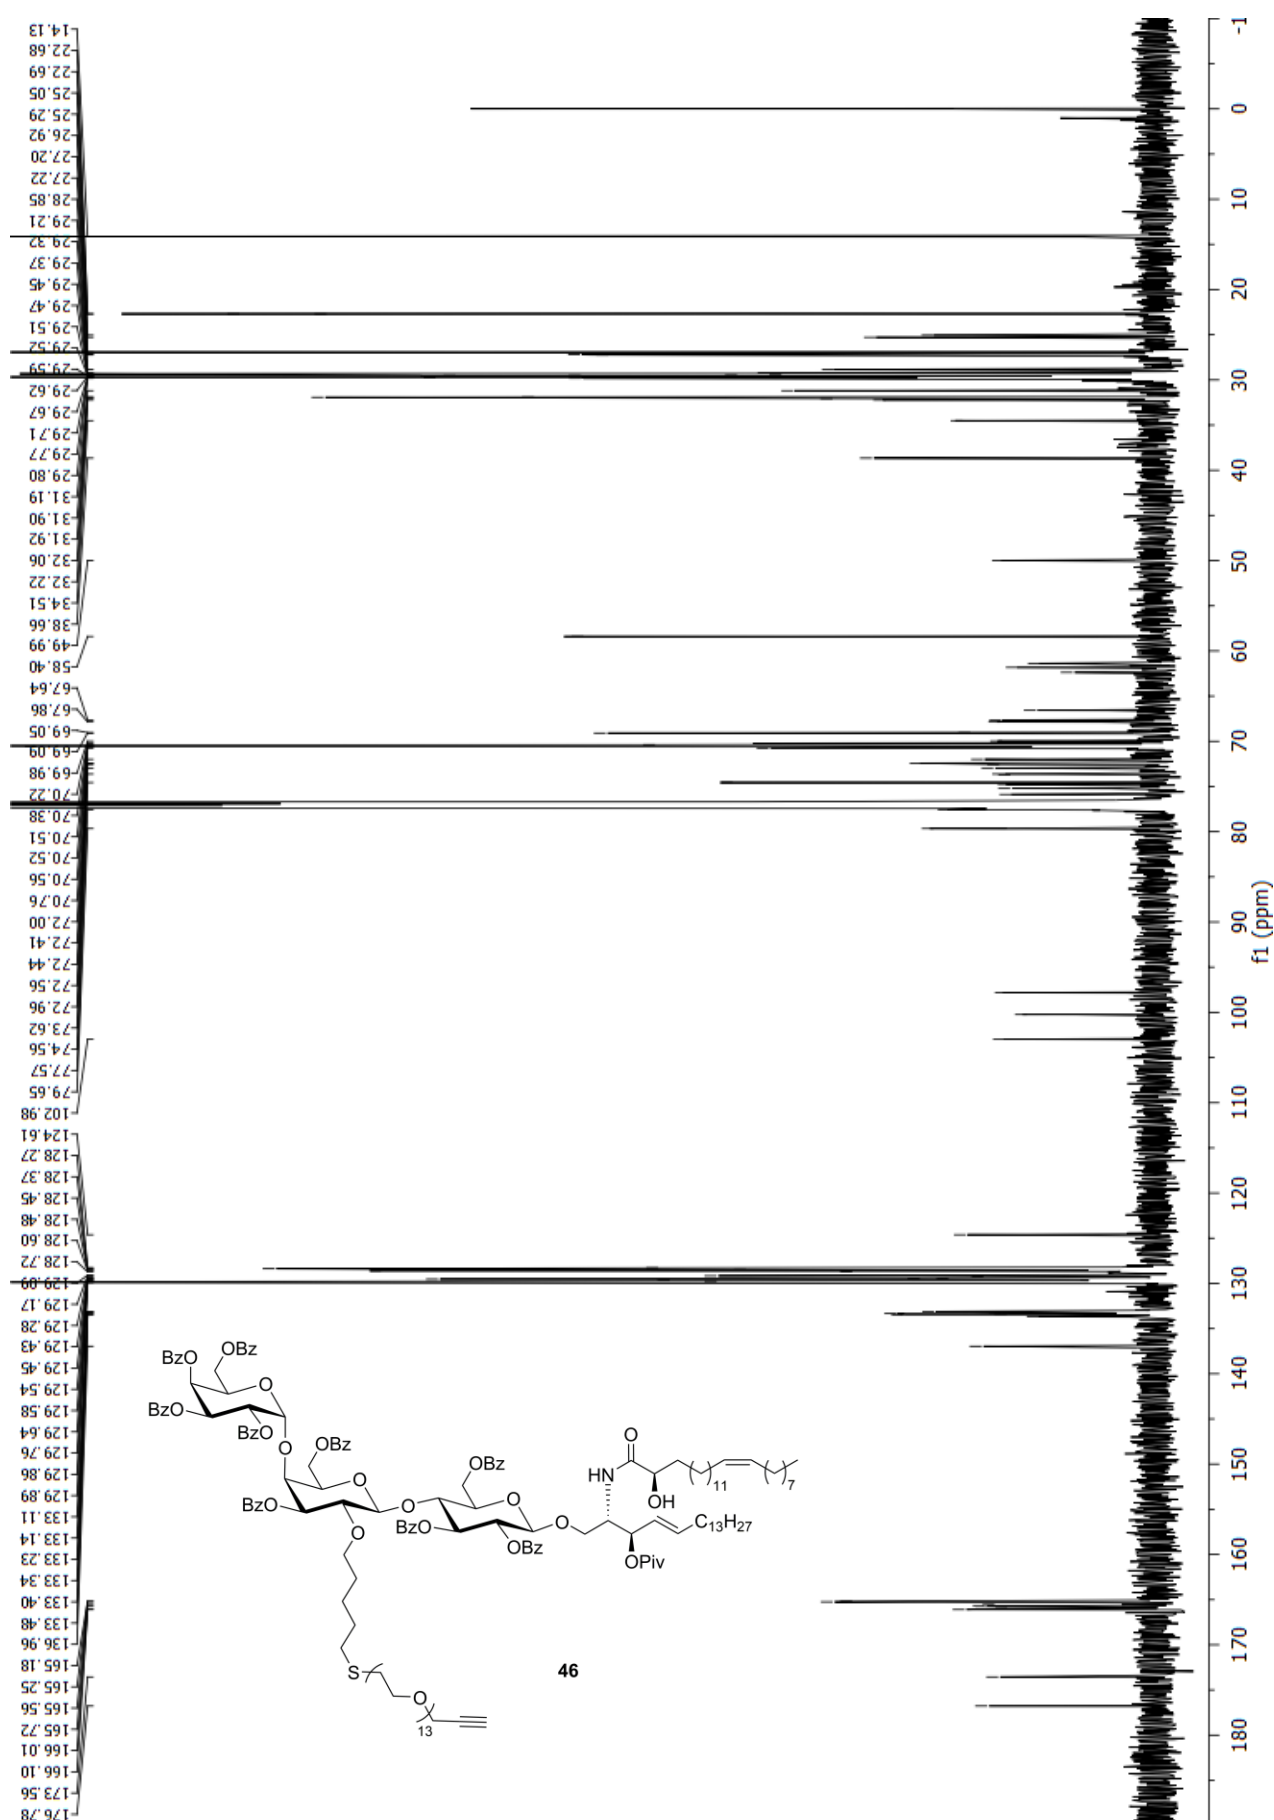



## SUPPORTING INFORMATION

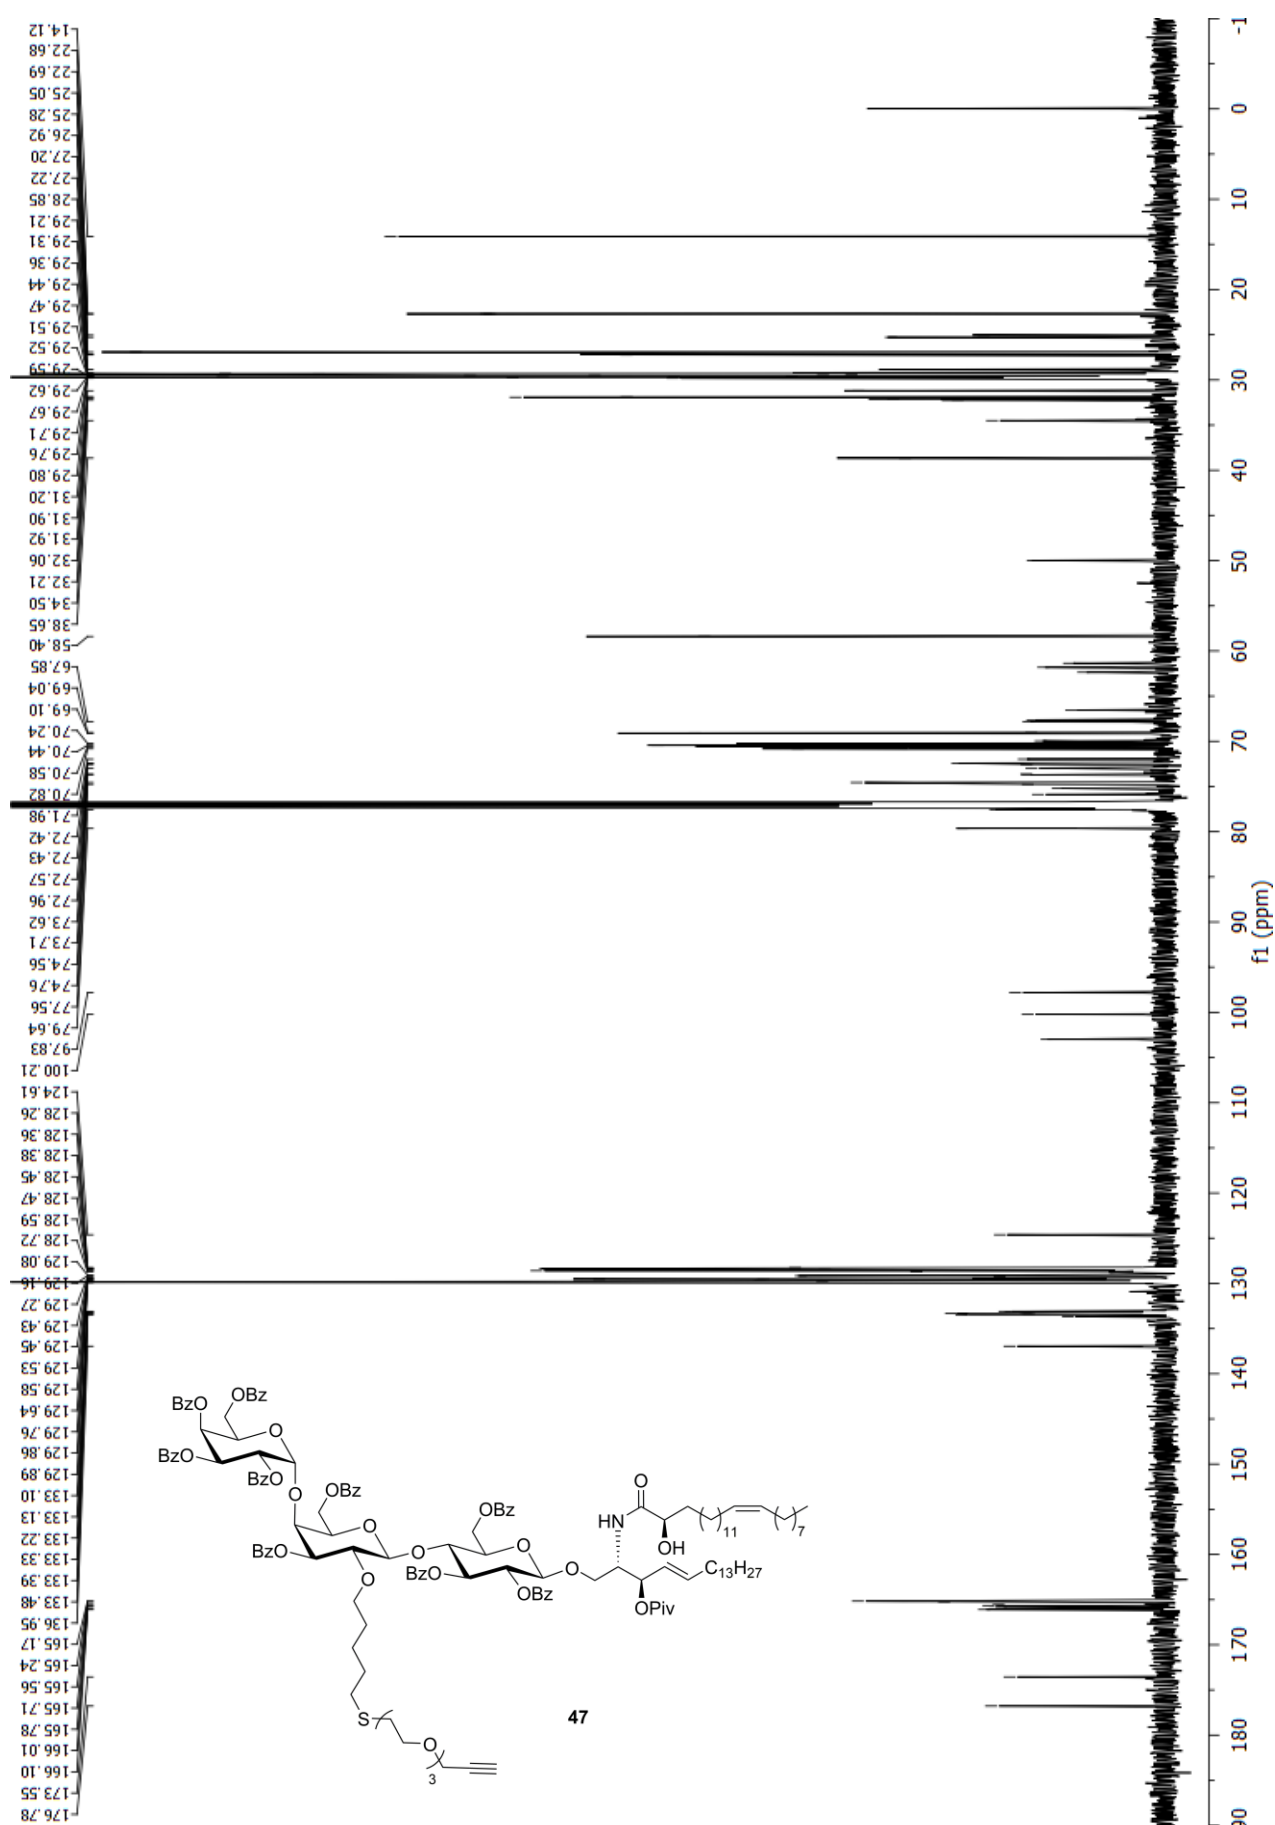



## SUPPORTING INFORMATION

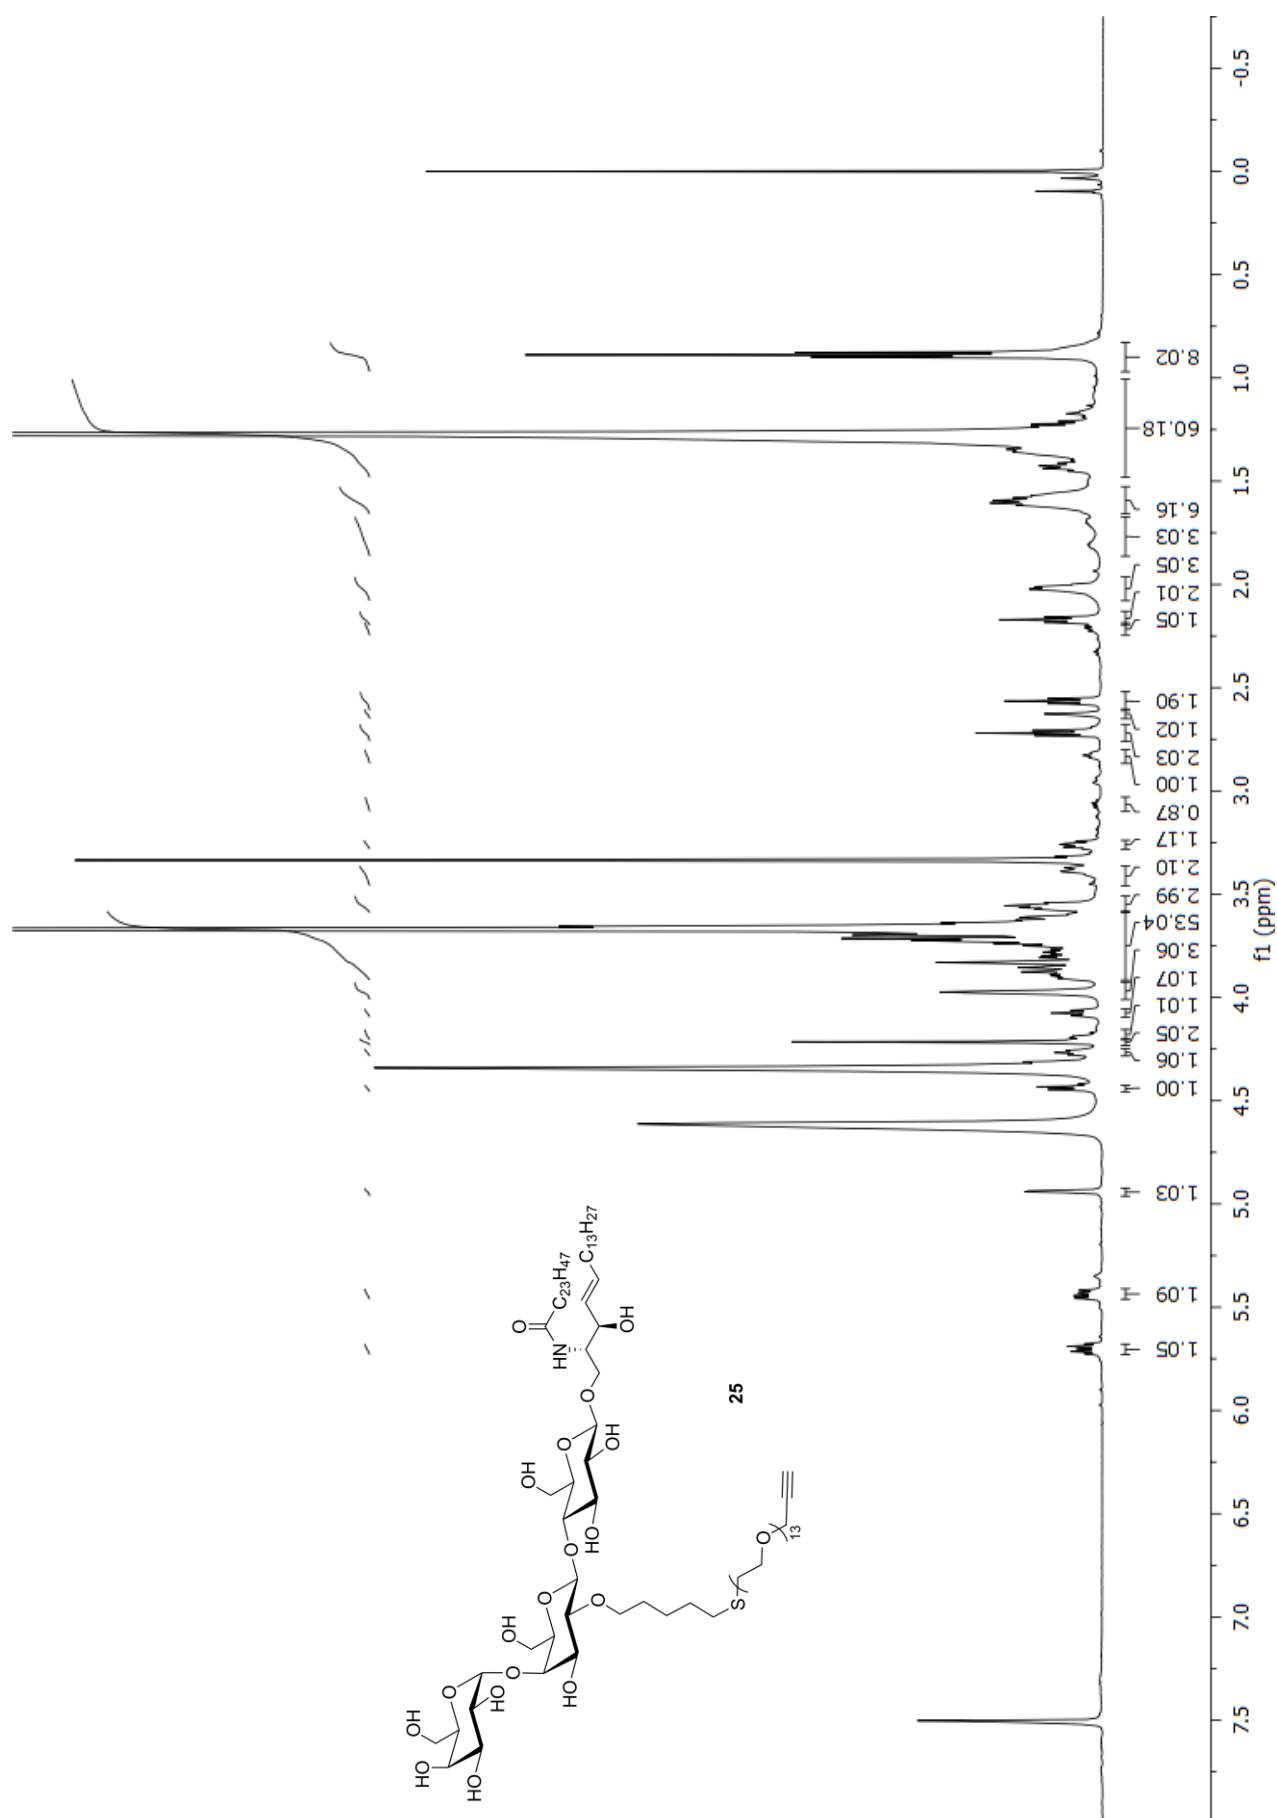

## SUPPORTING INFORMATION

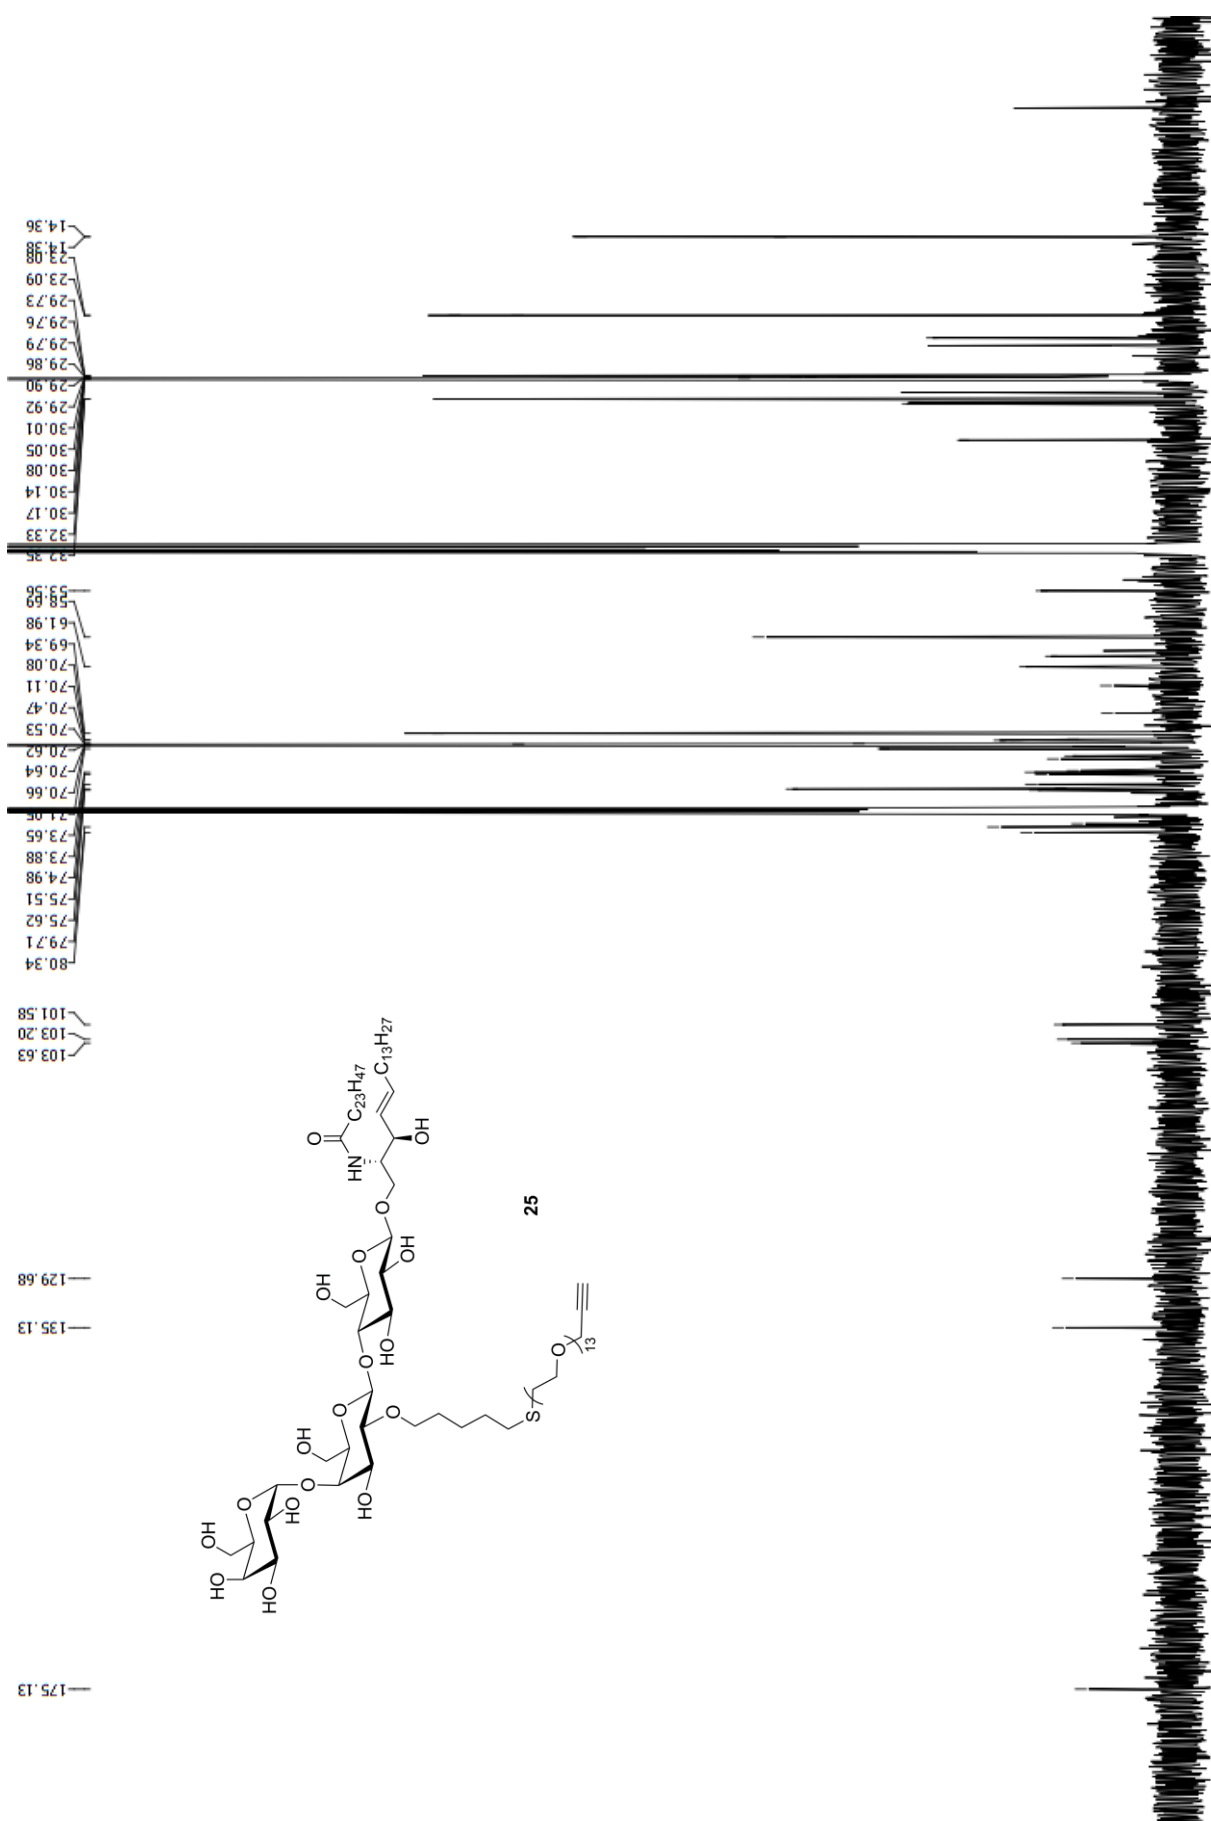

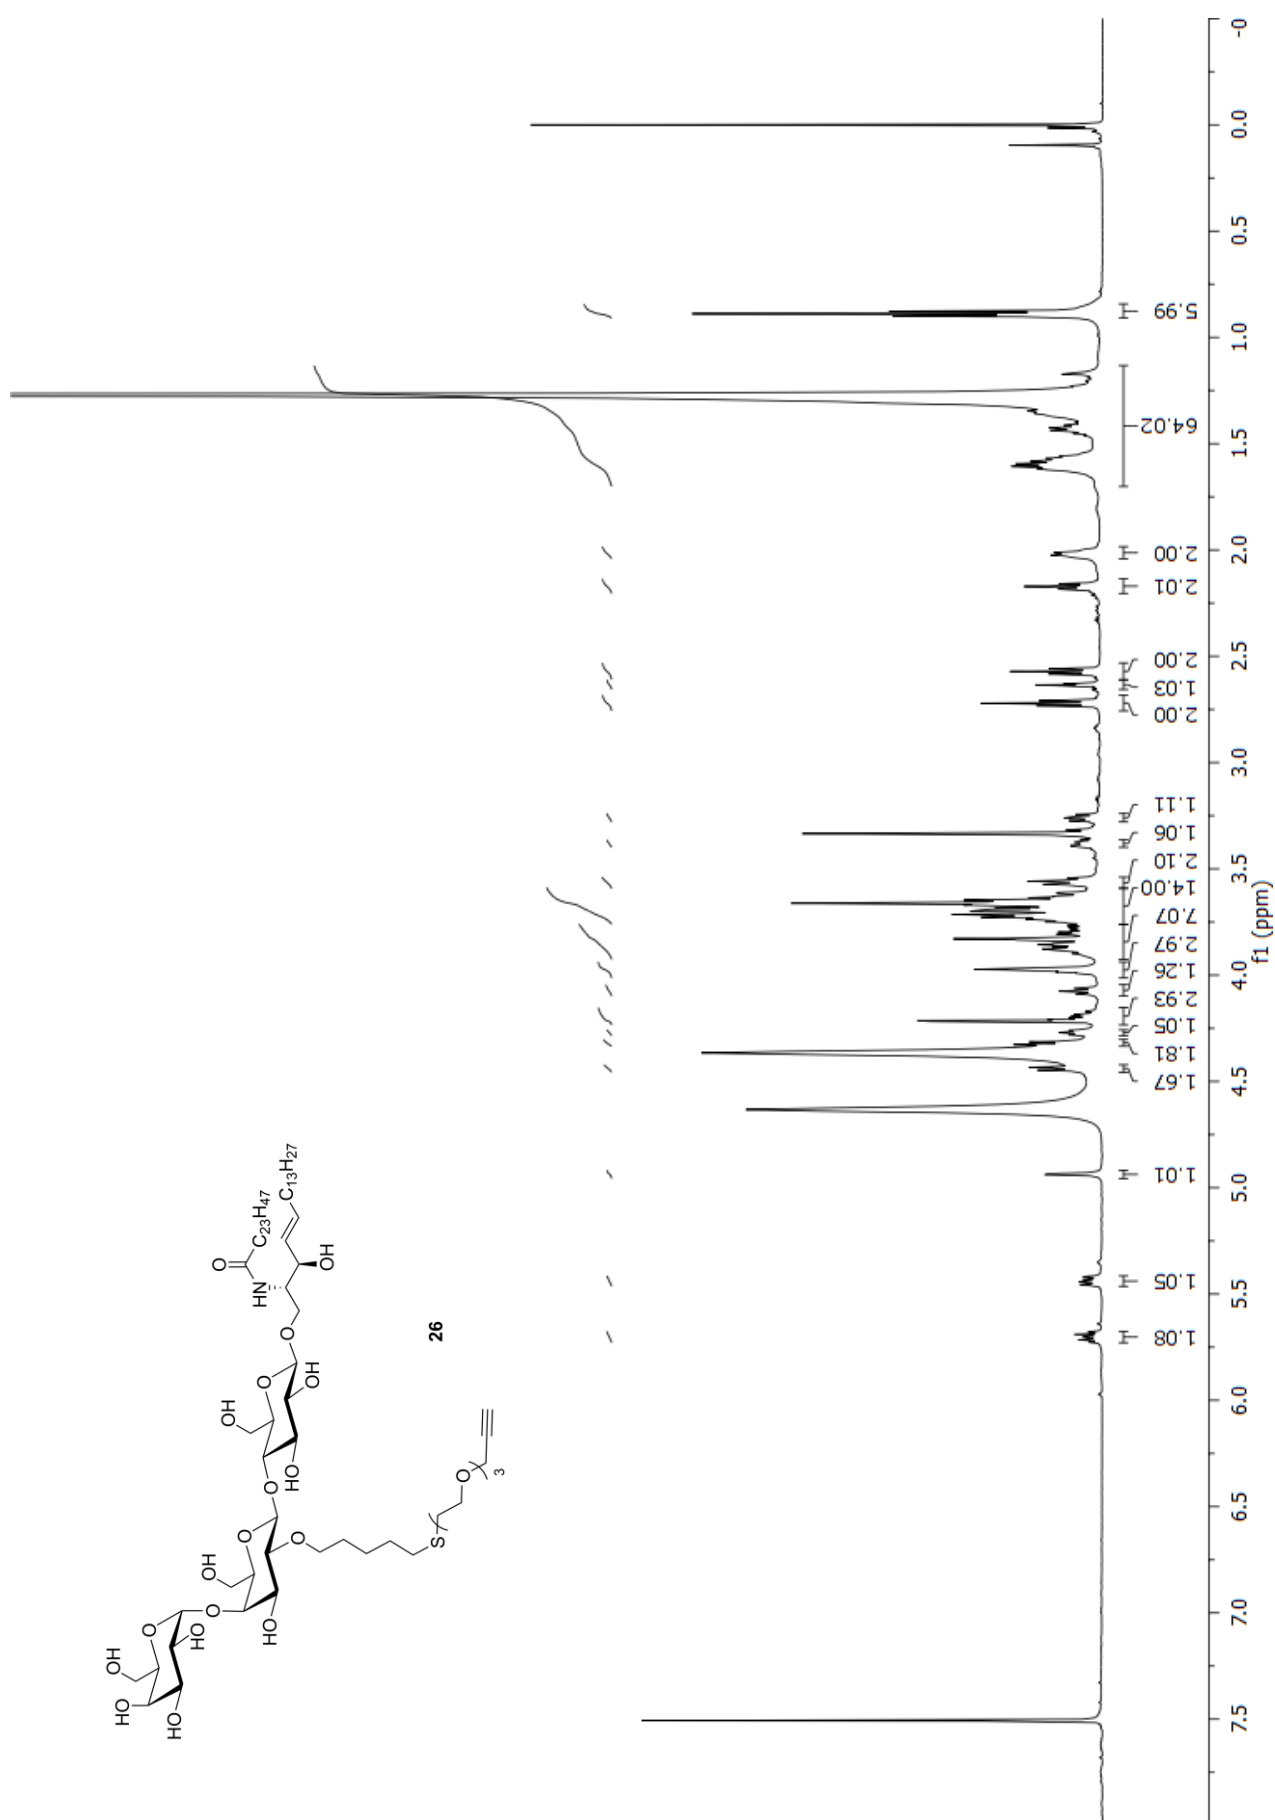

## SUPPORTING INFORMATION

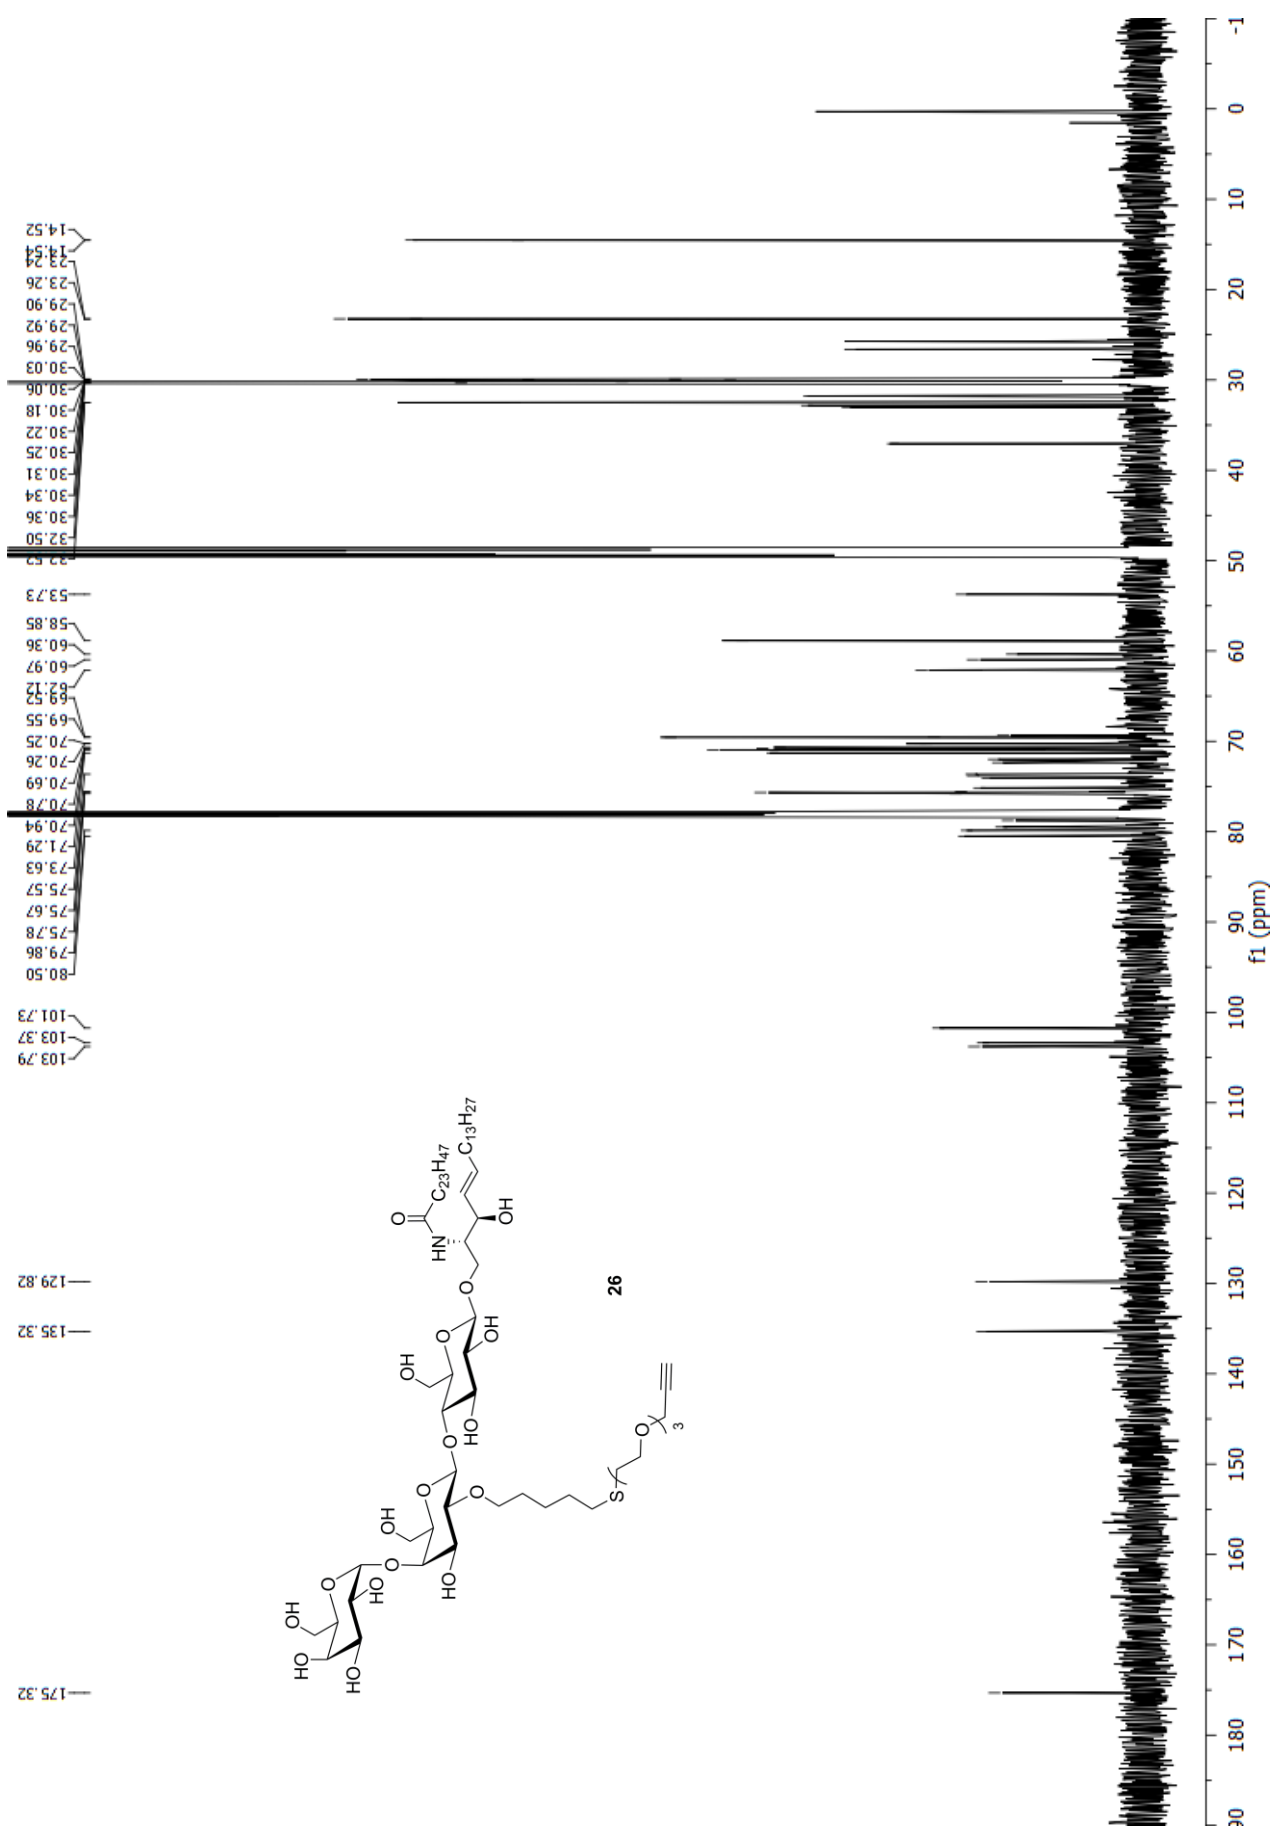

## SUPPORTING INFORMATION

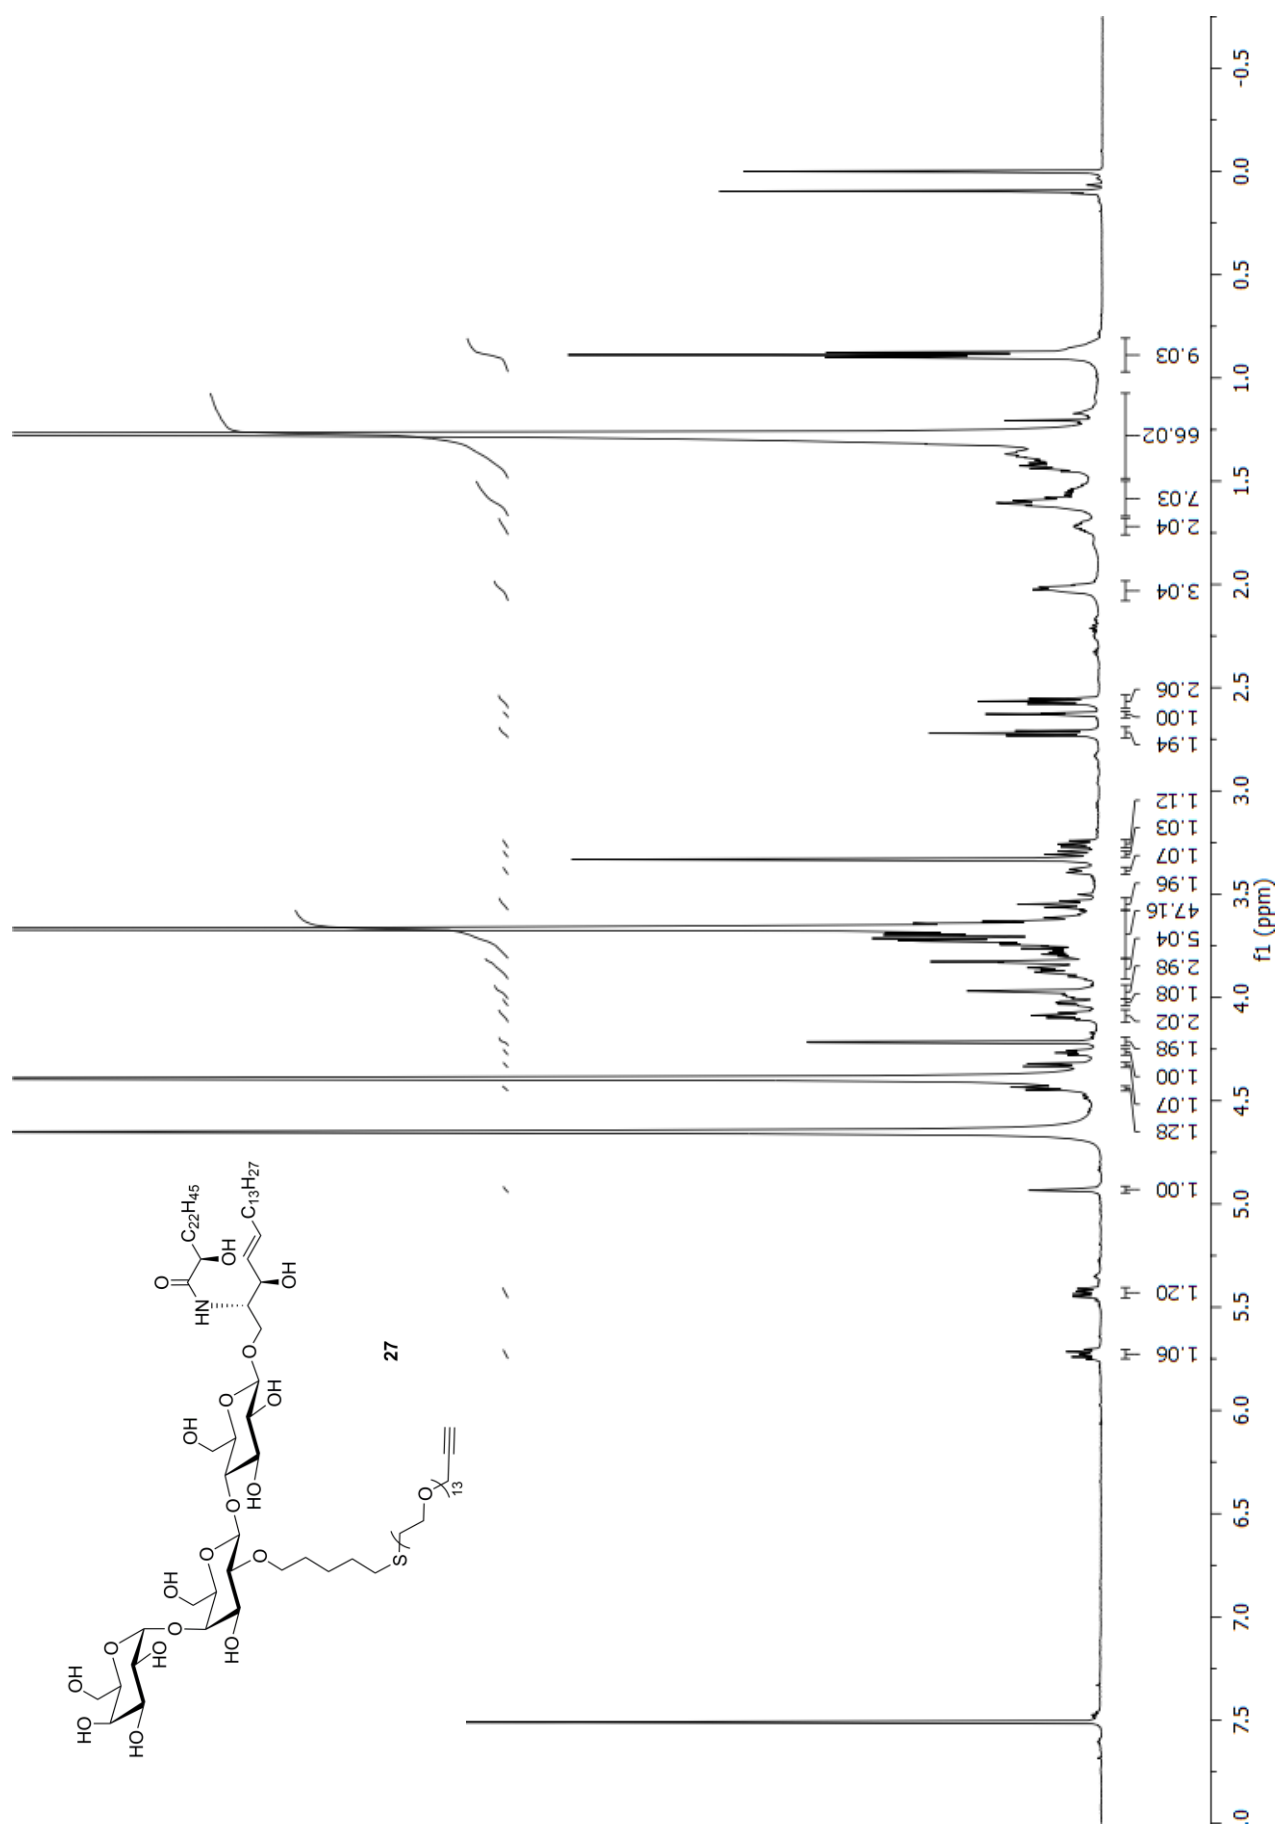

## SUPPORTING INFORMATION

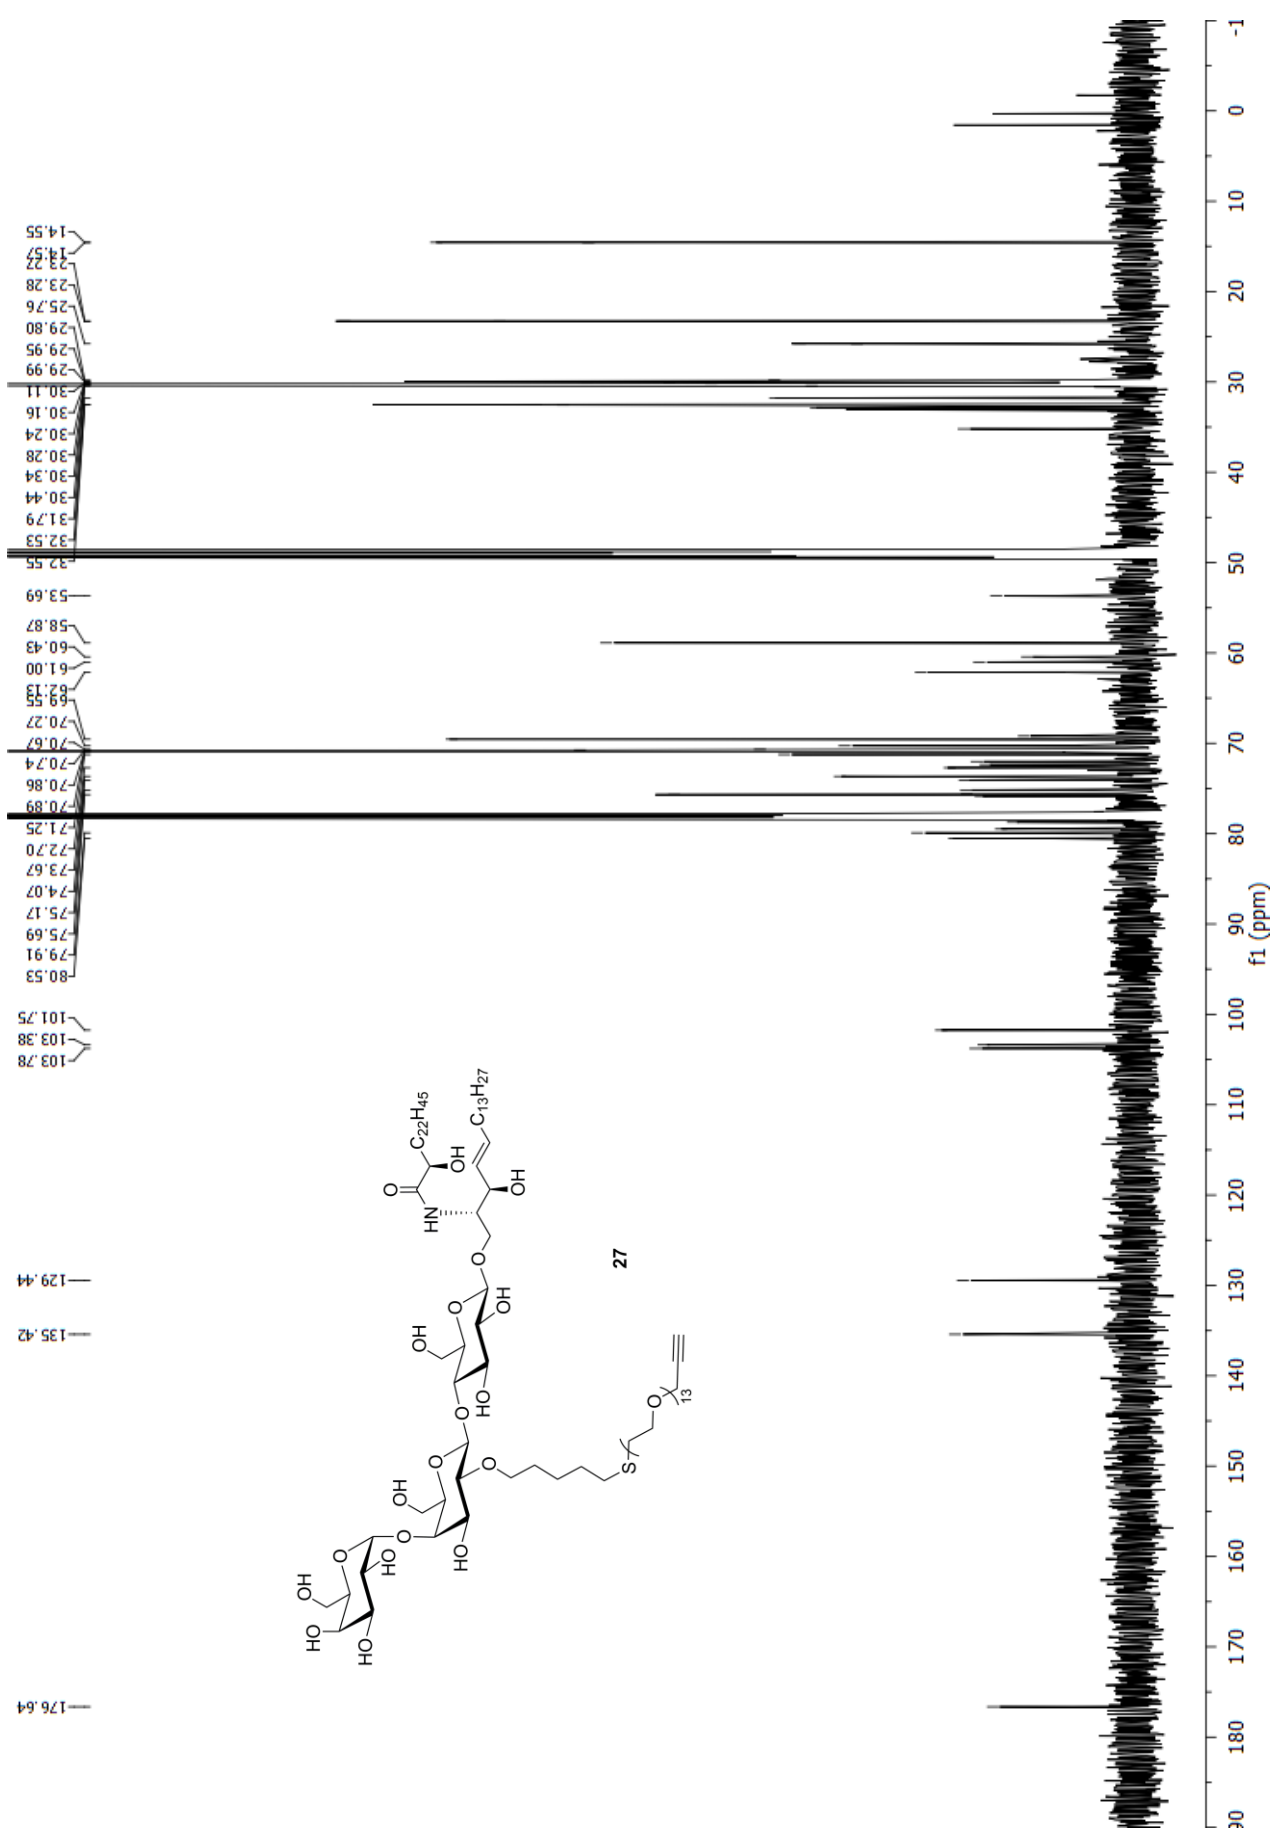



## SUPPORTING INFORMATION

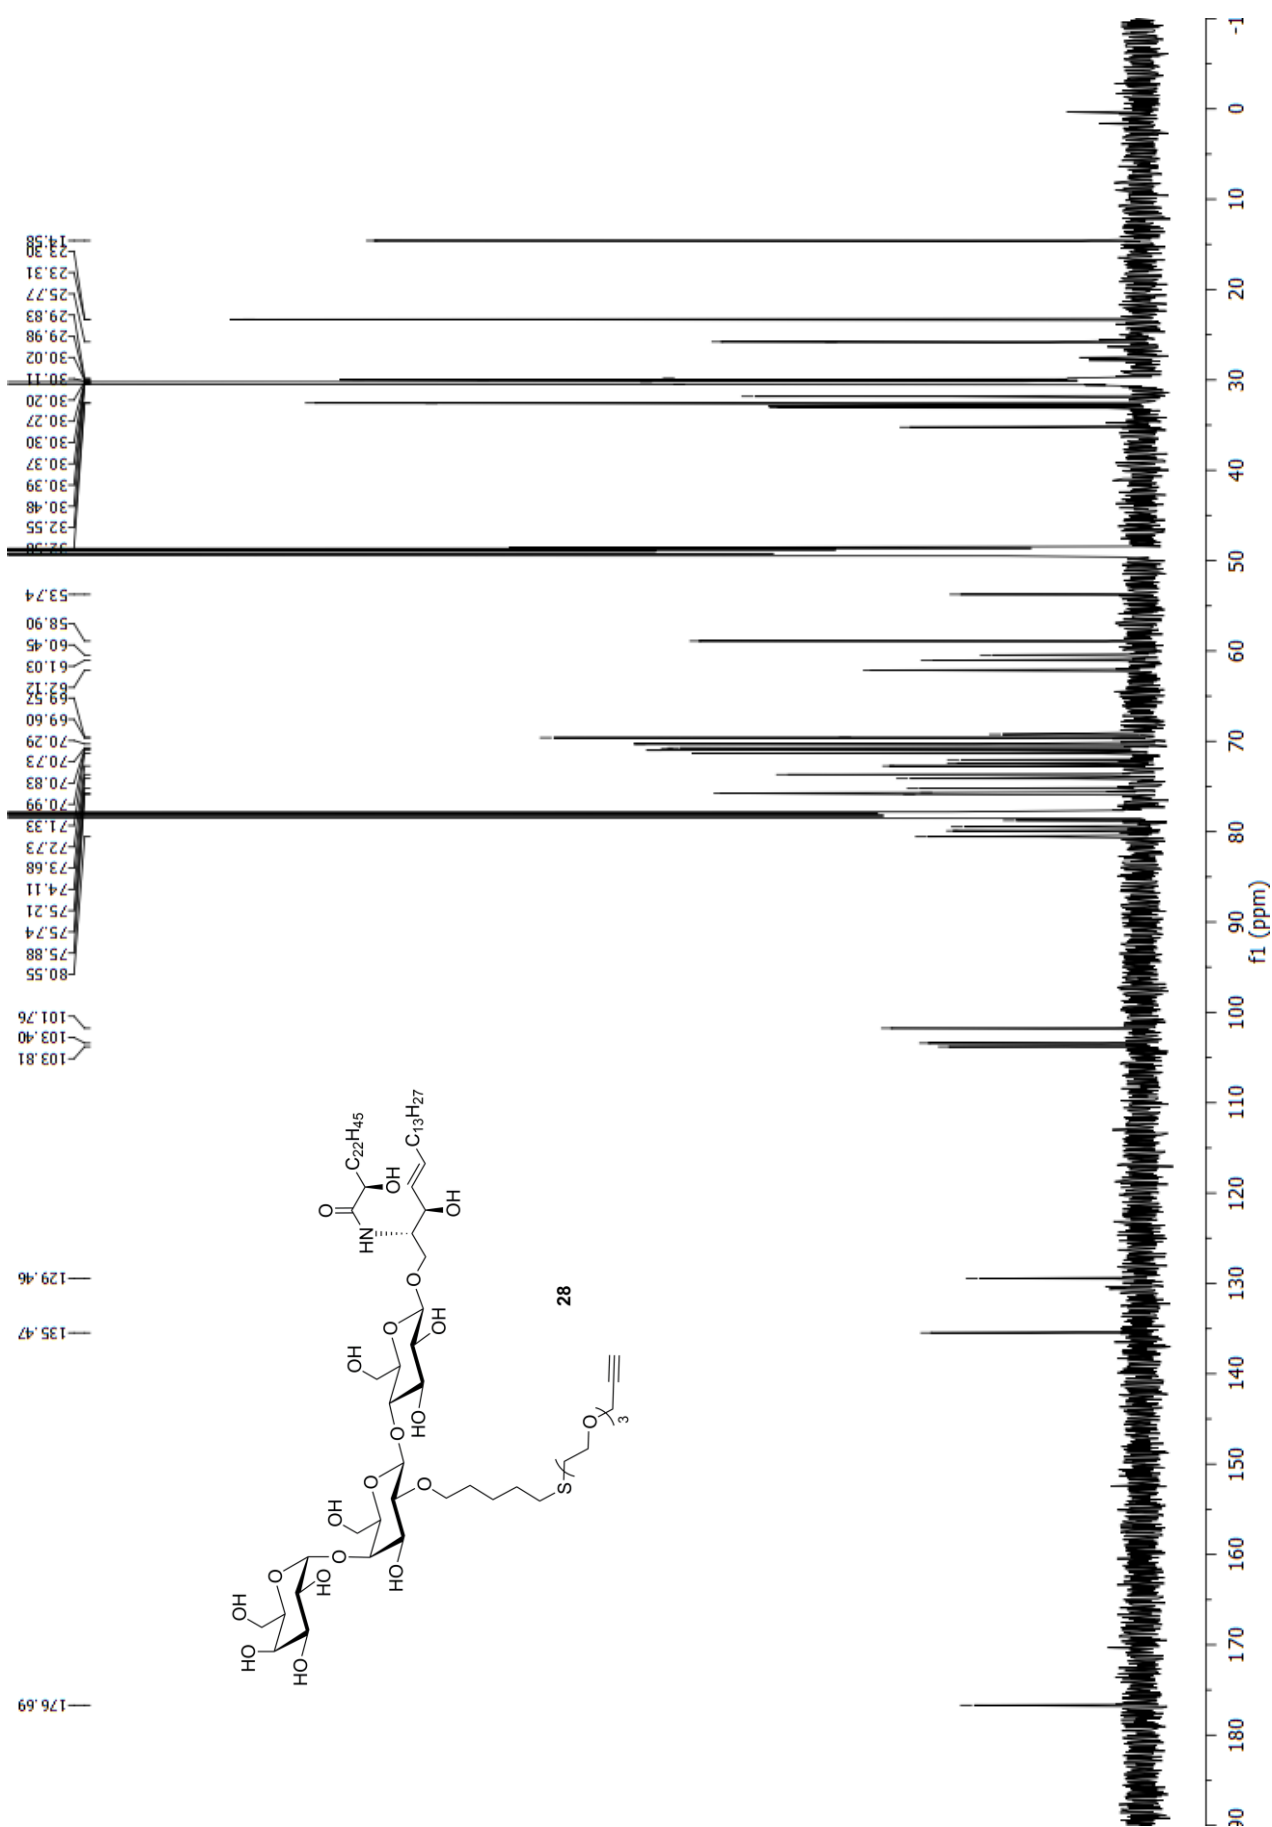



## SUPPORTING INFORMATION

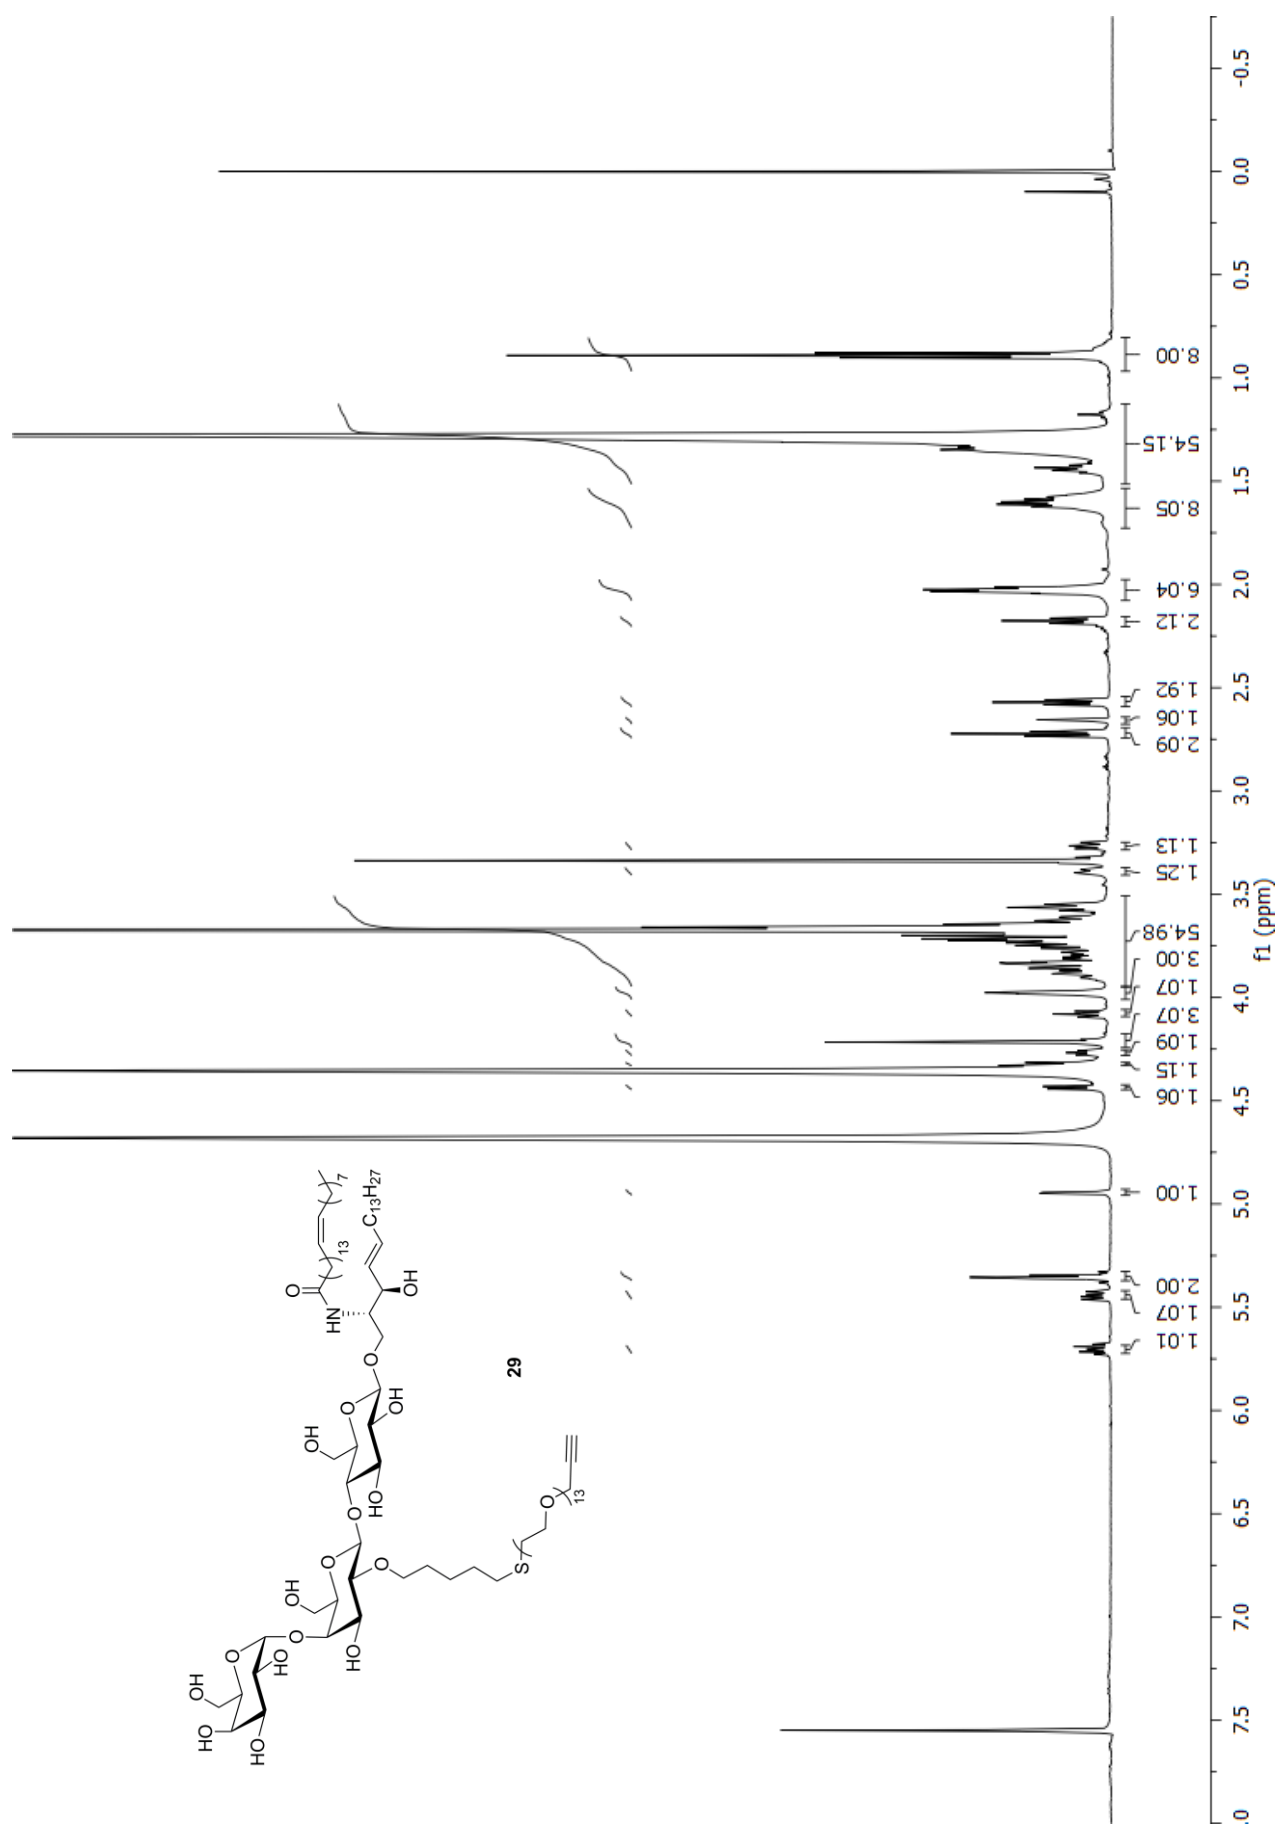

## SUPPORTING INFORMATION

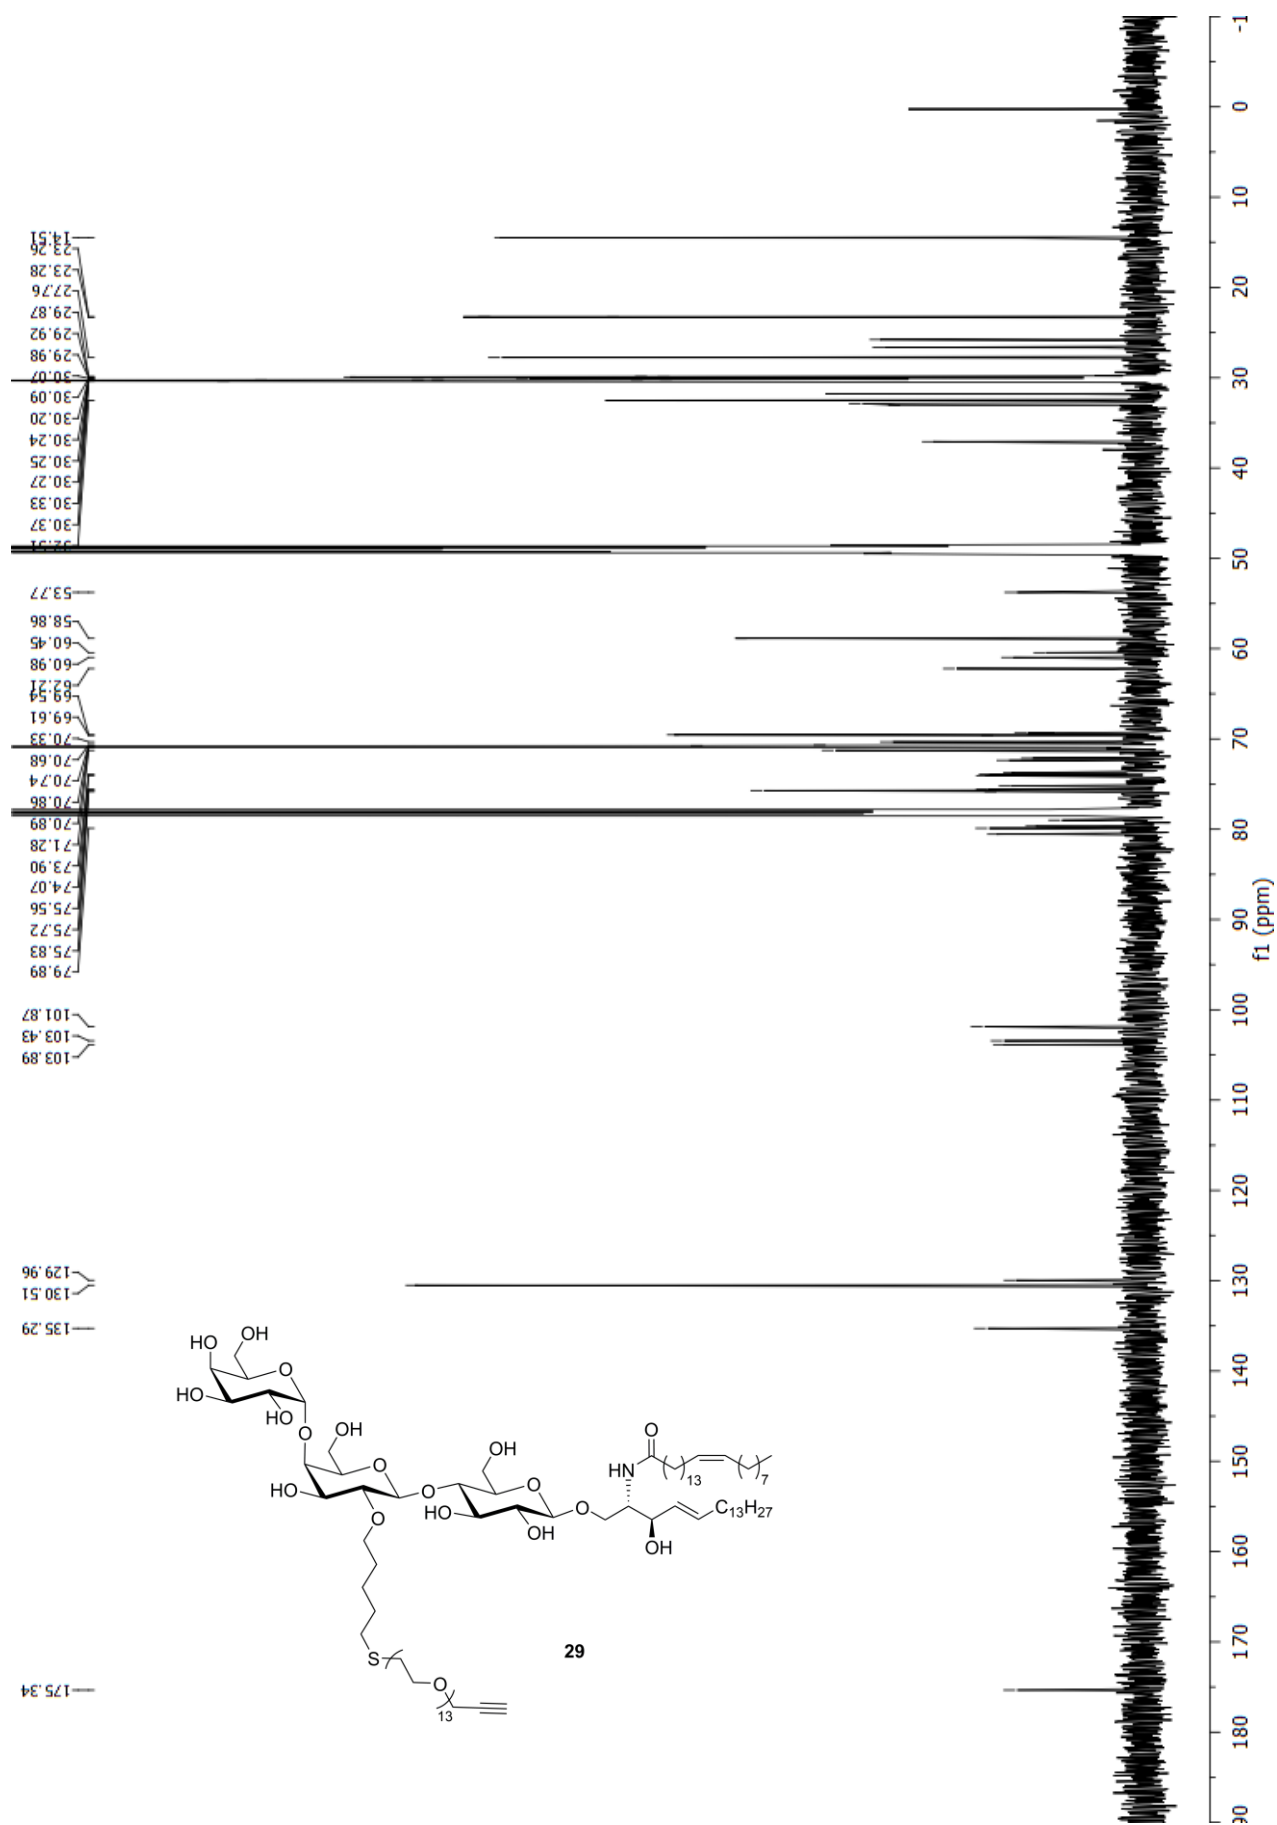

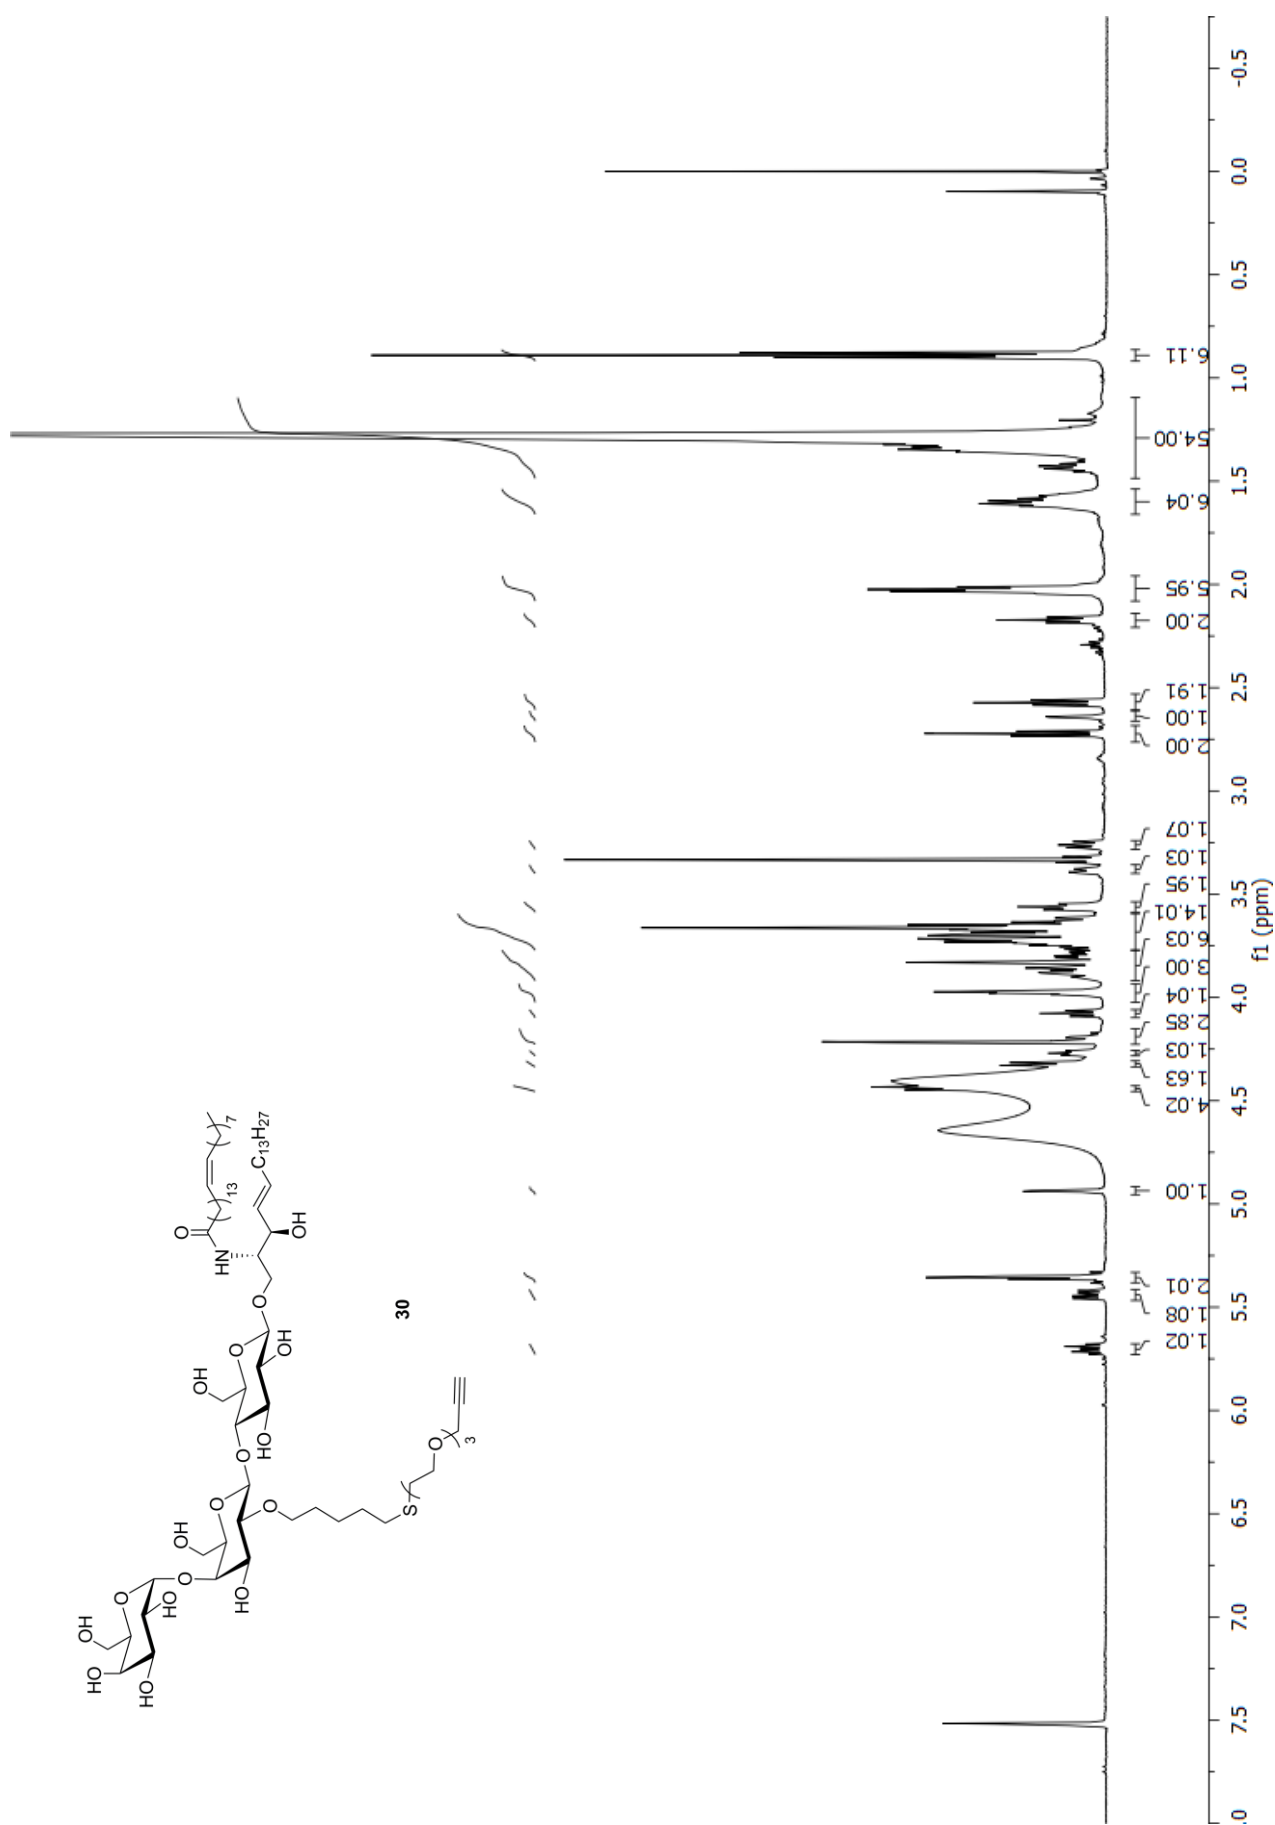

## SUPPORTING INFORMATION

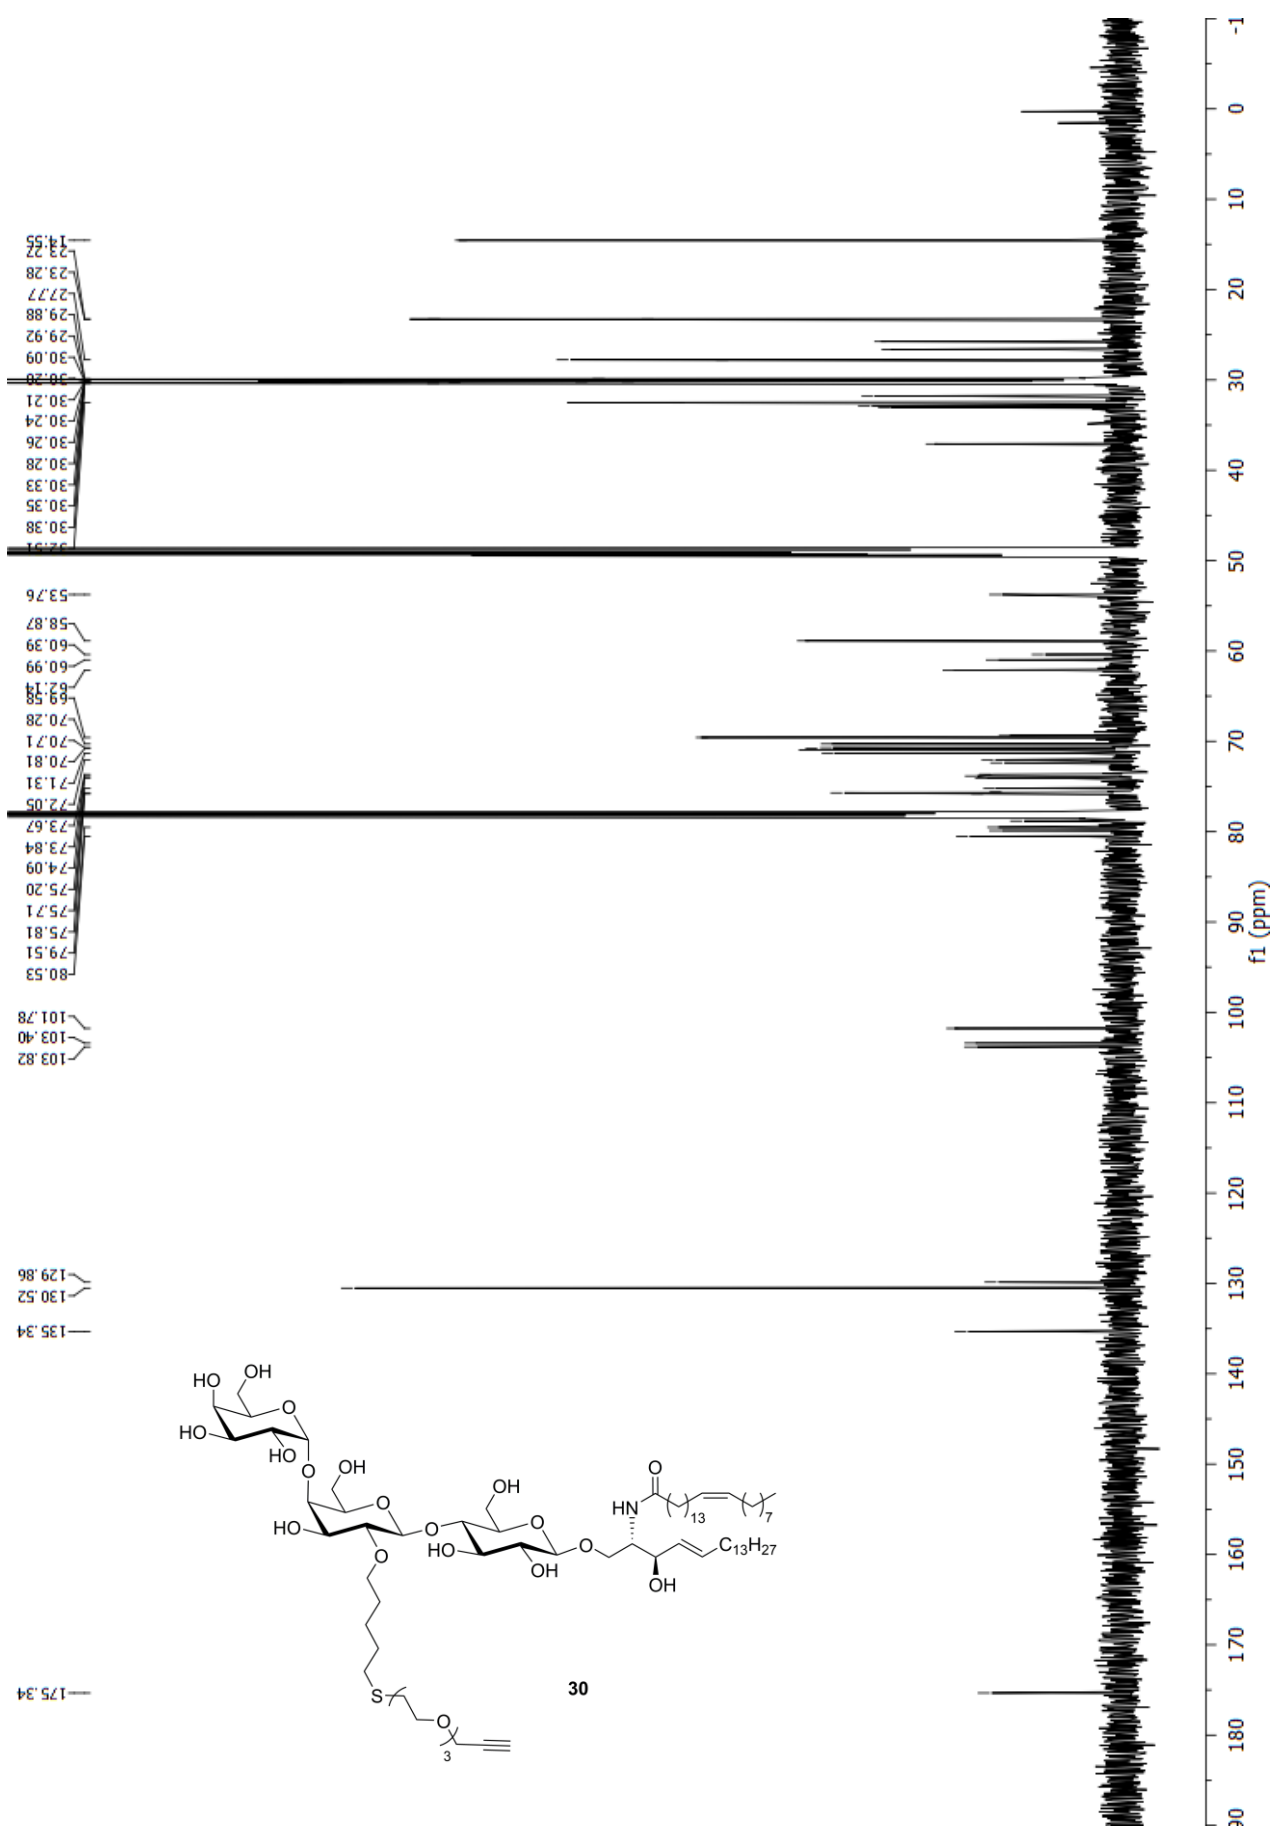

## SUPPORTING INFORMATION

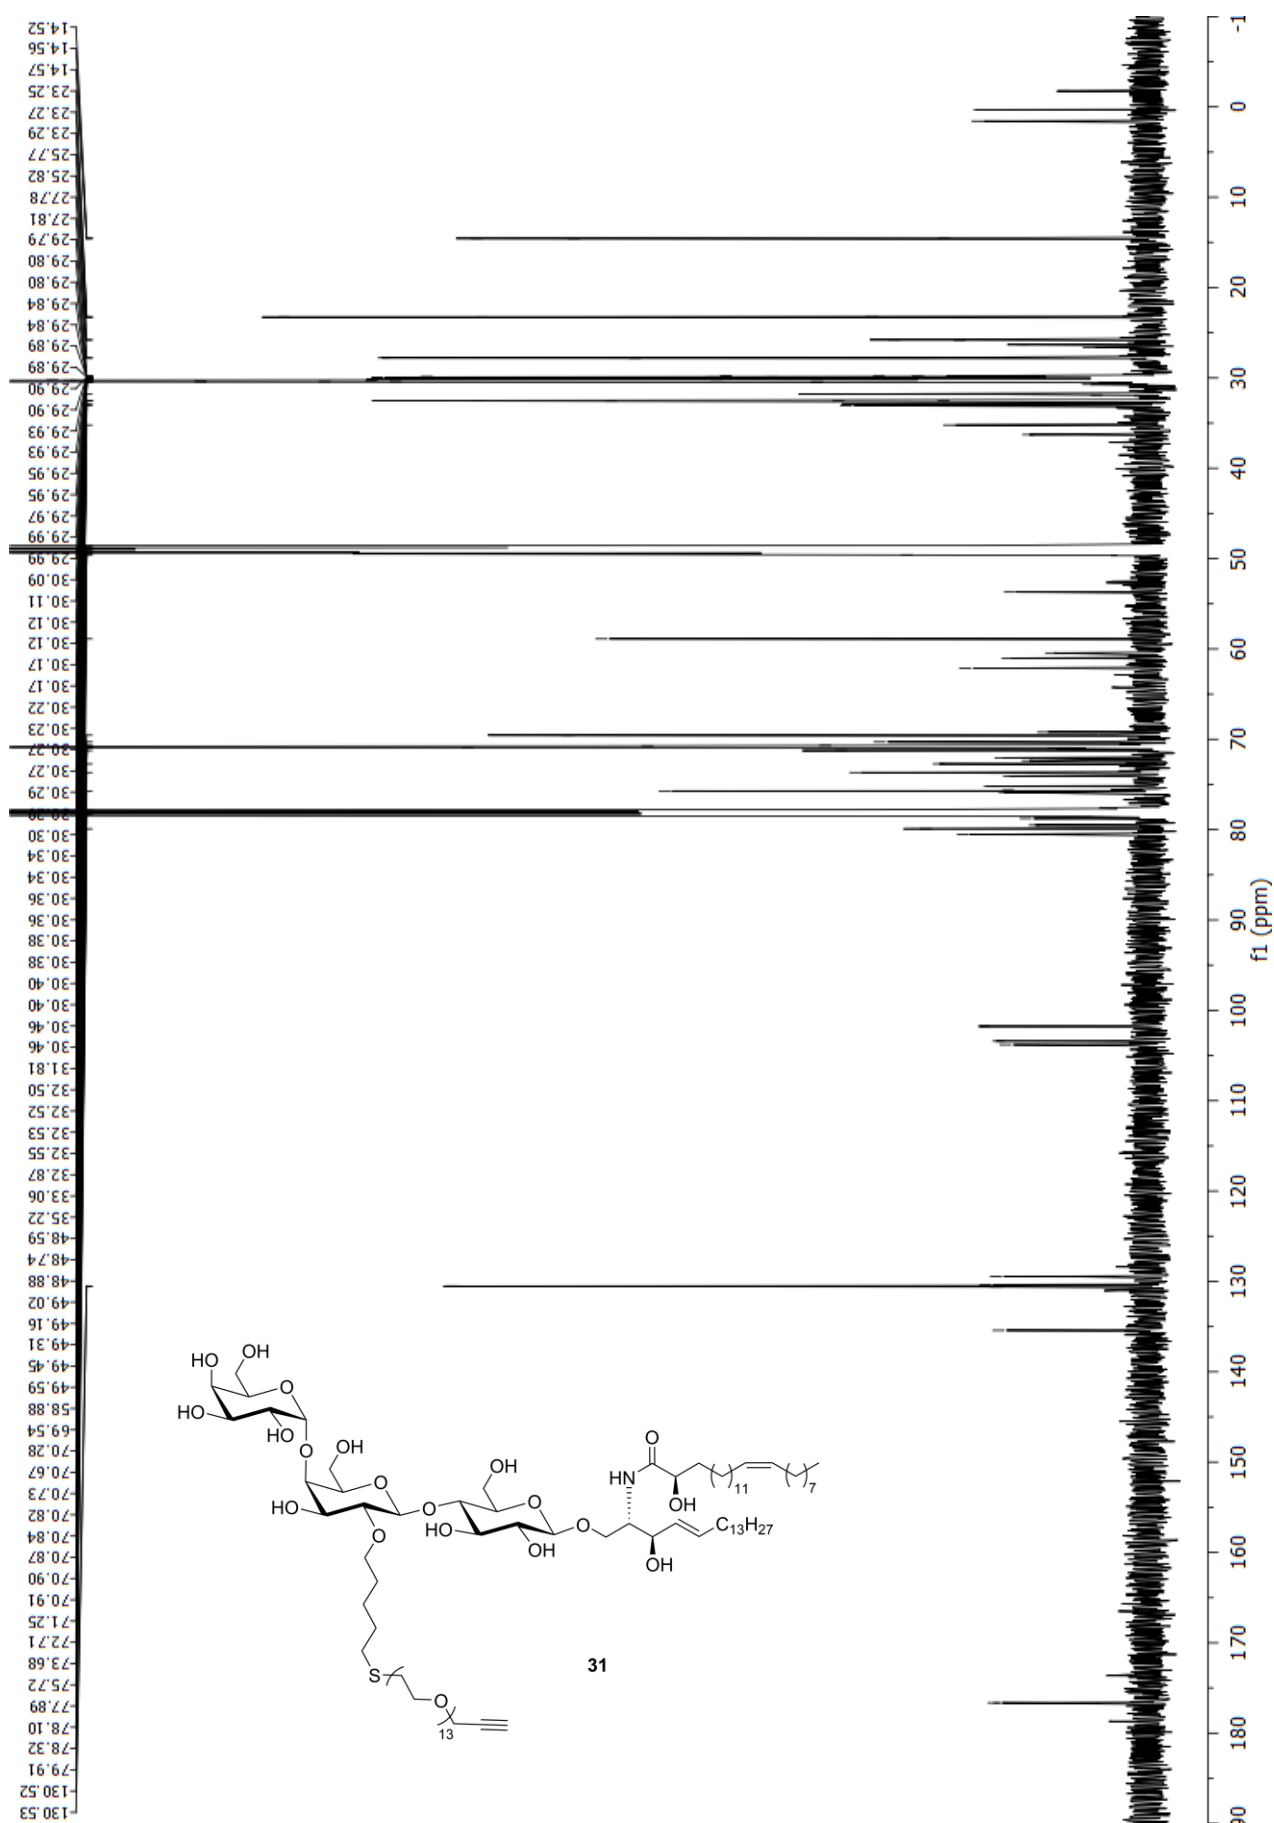



## SUPPORTING INFORMATION

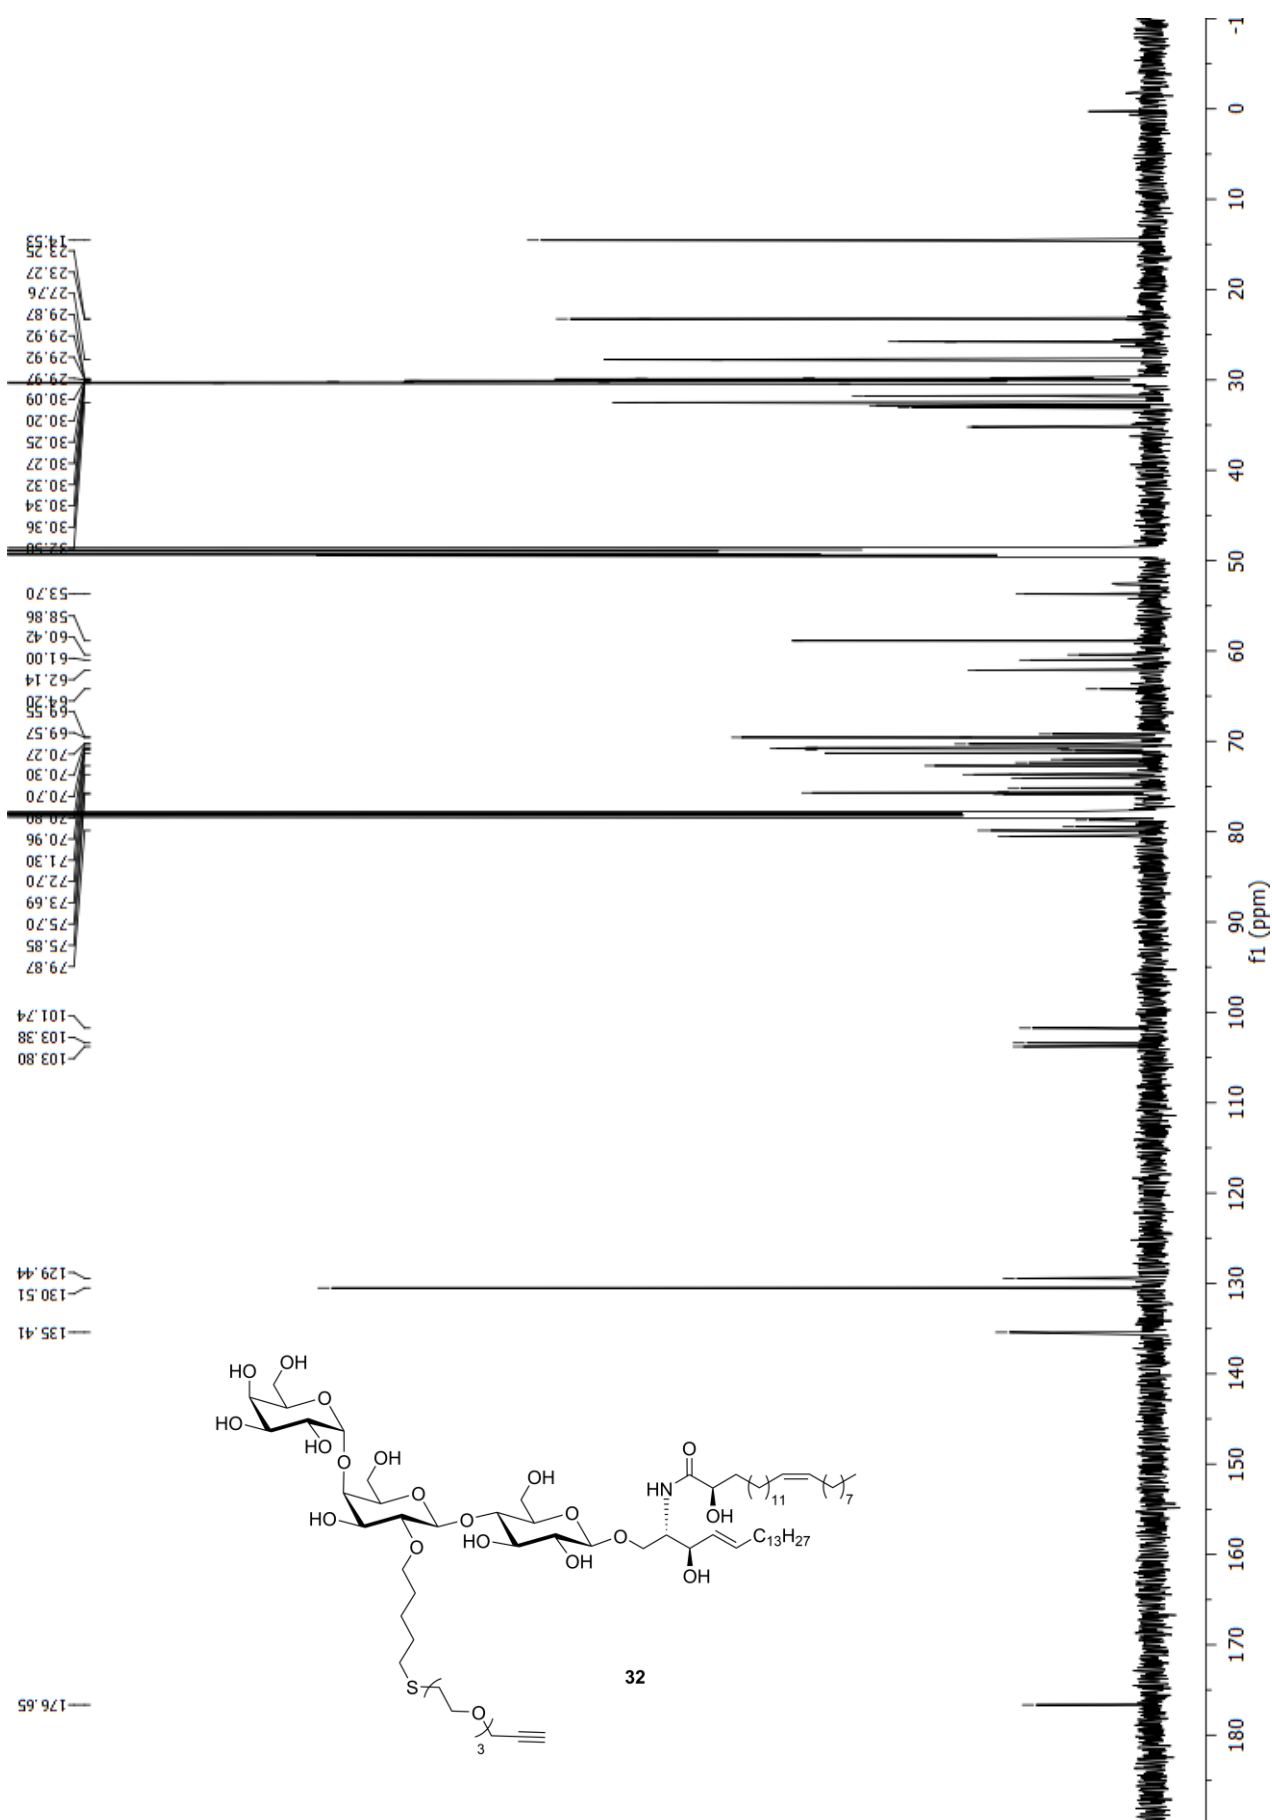





## SUPPORTING INFORMATION

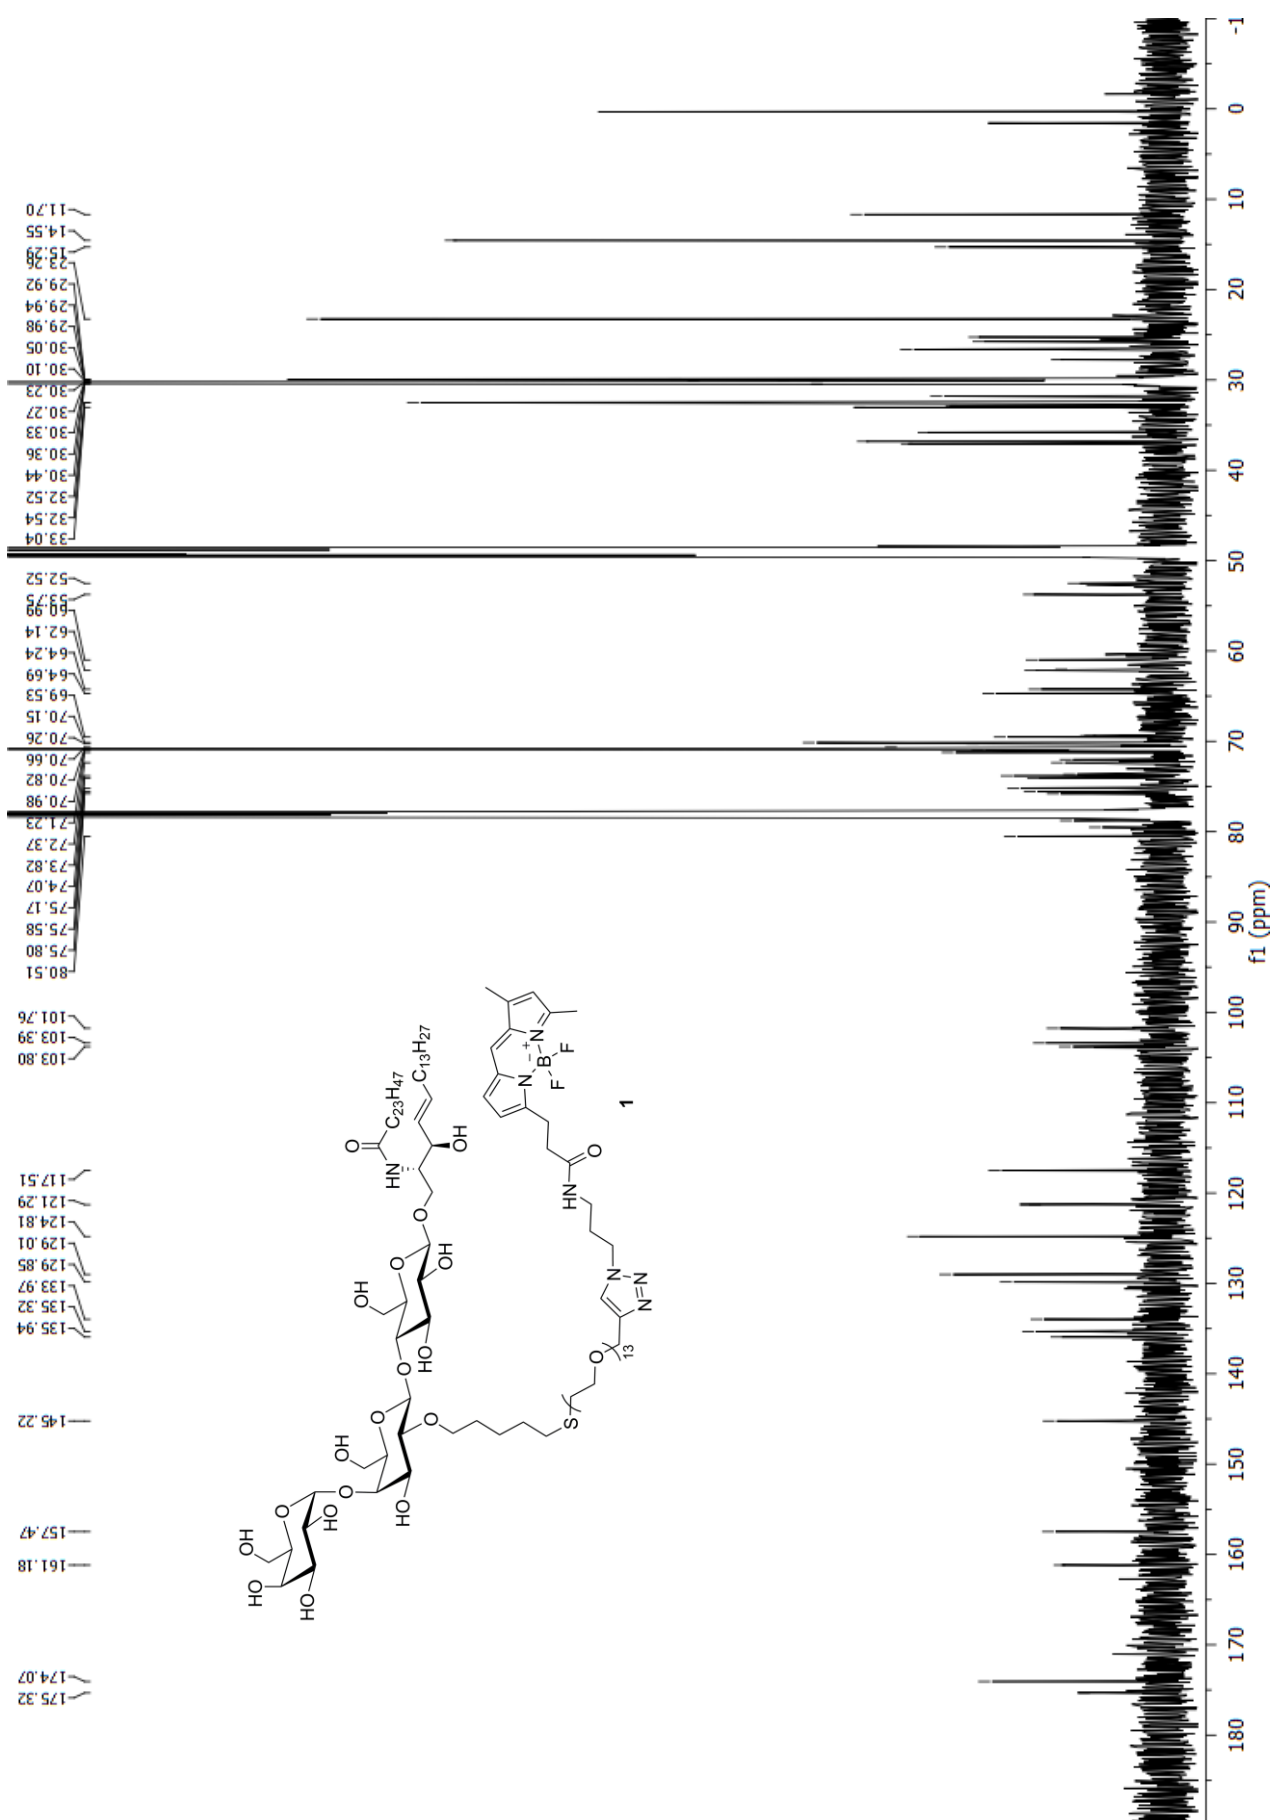

## SUPPORTING INFORMATION

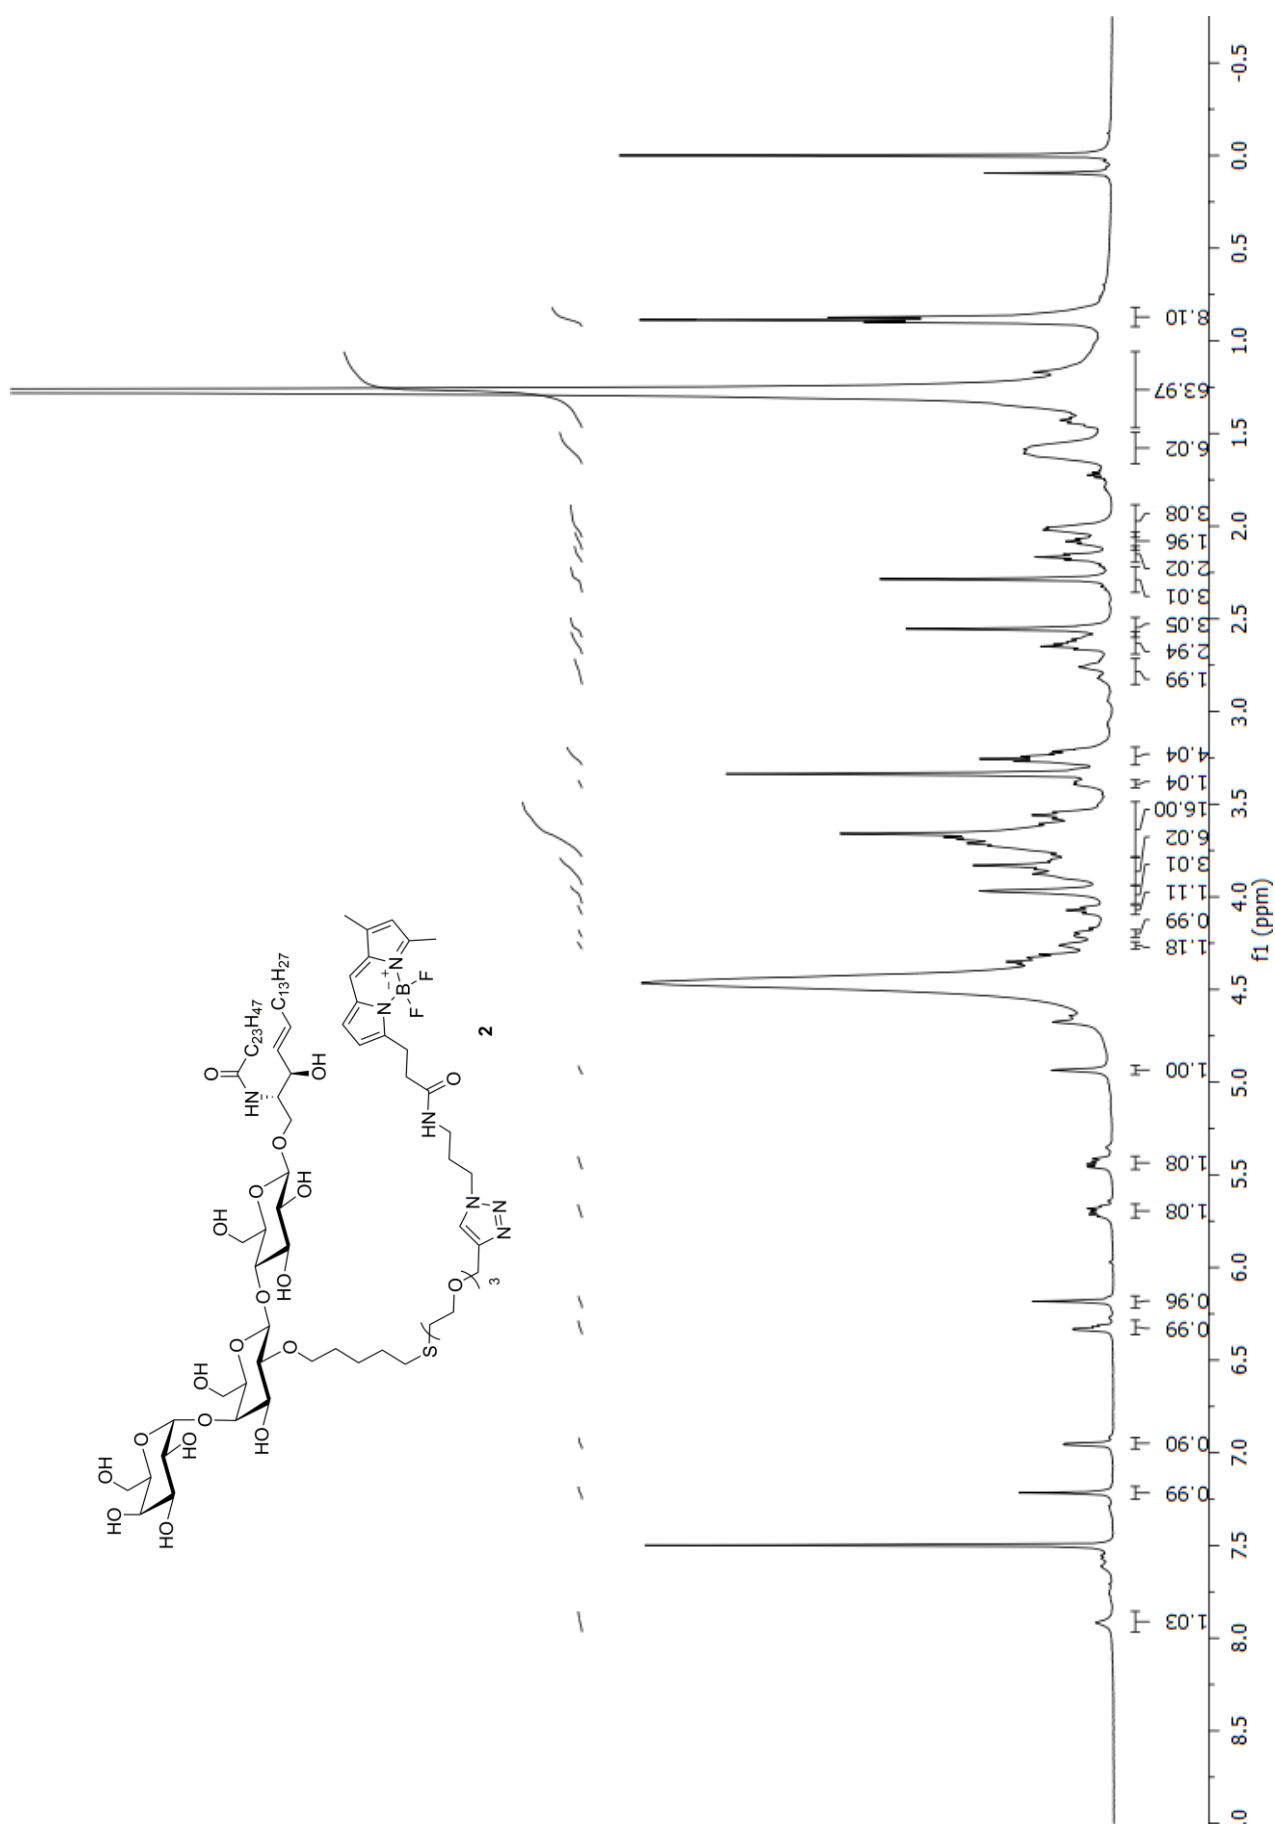

## SUPPORTING INFORMATION

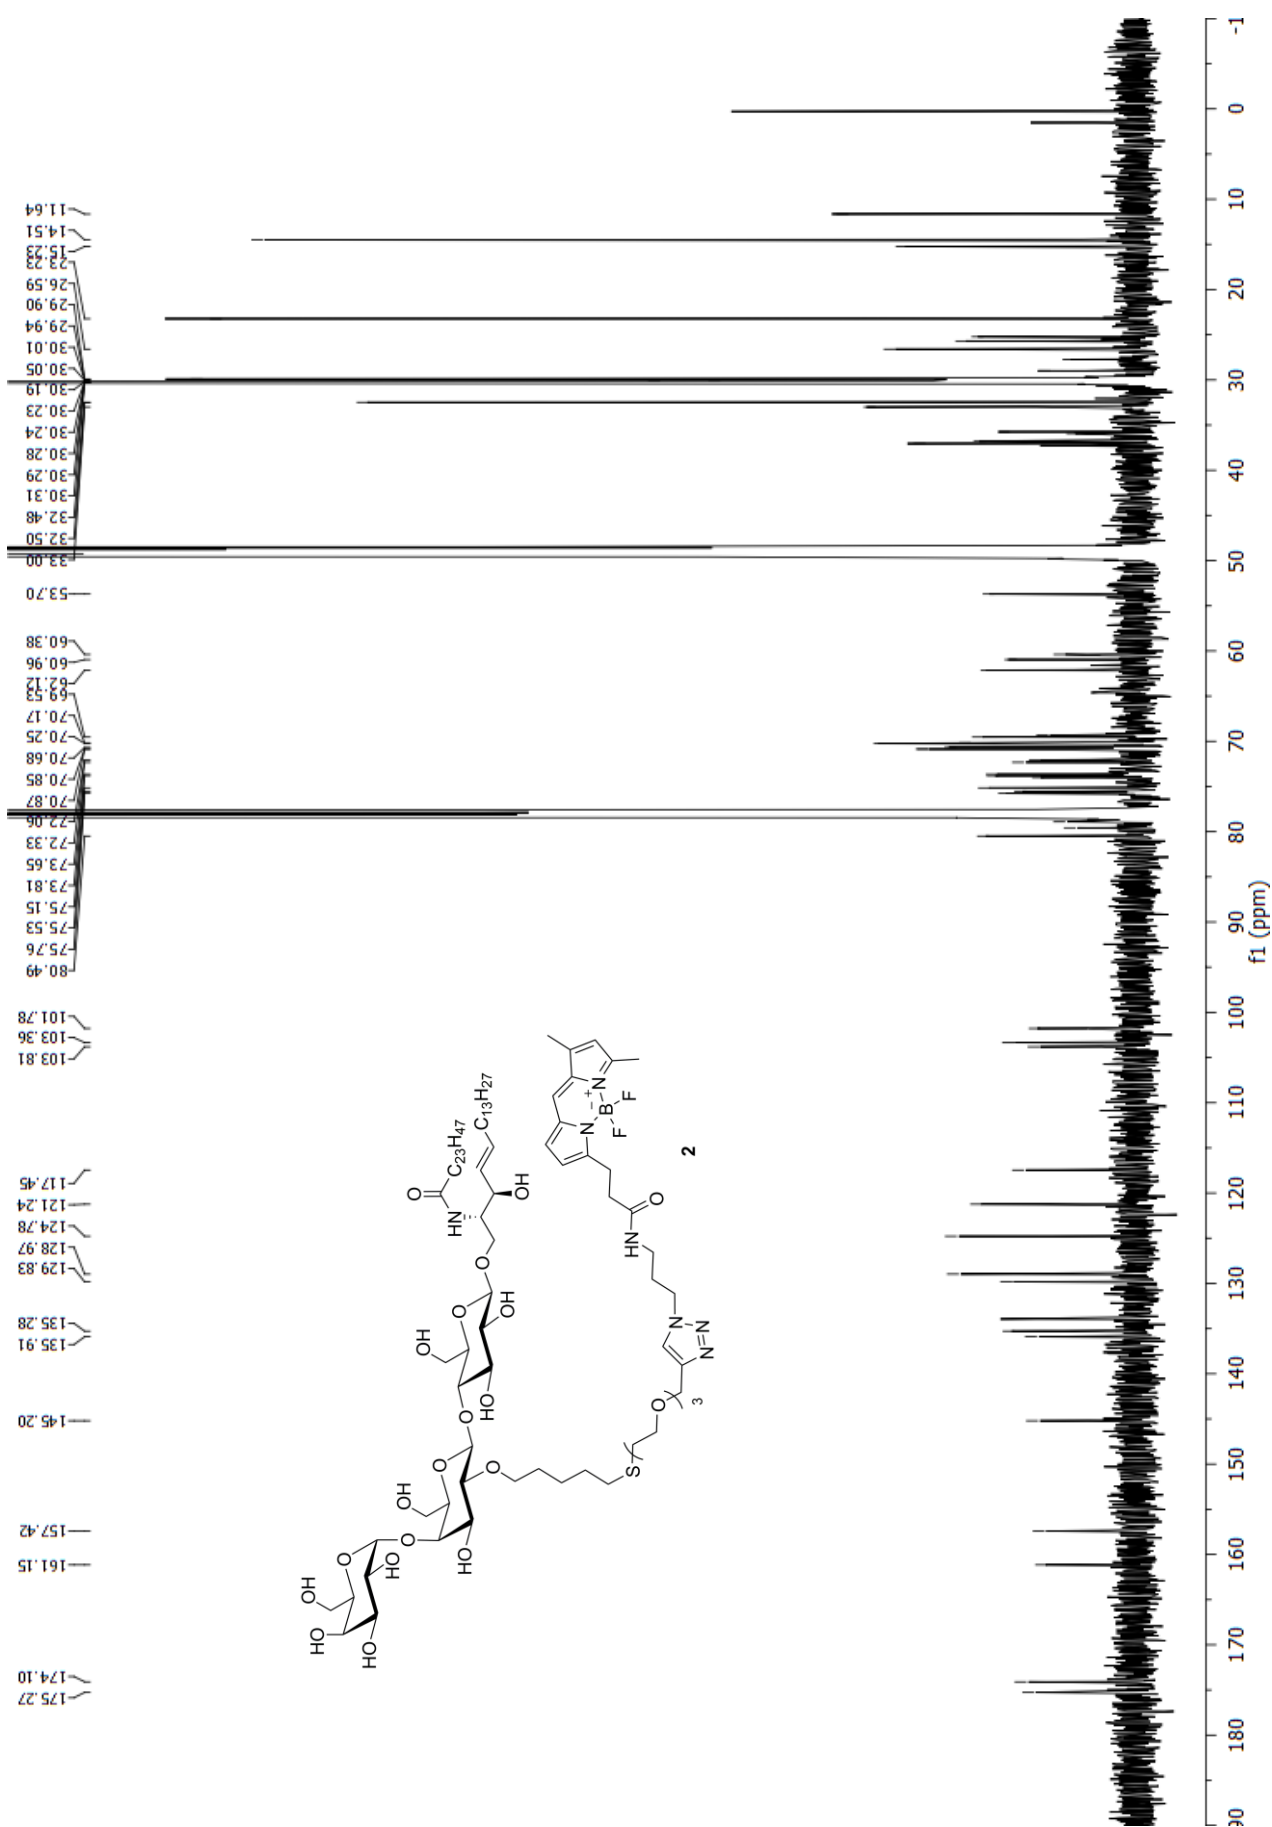



## SUPPORTING INFORMATION

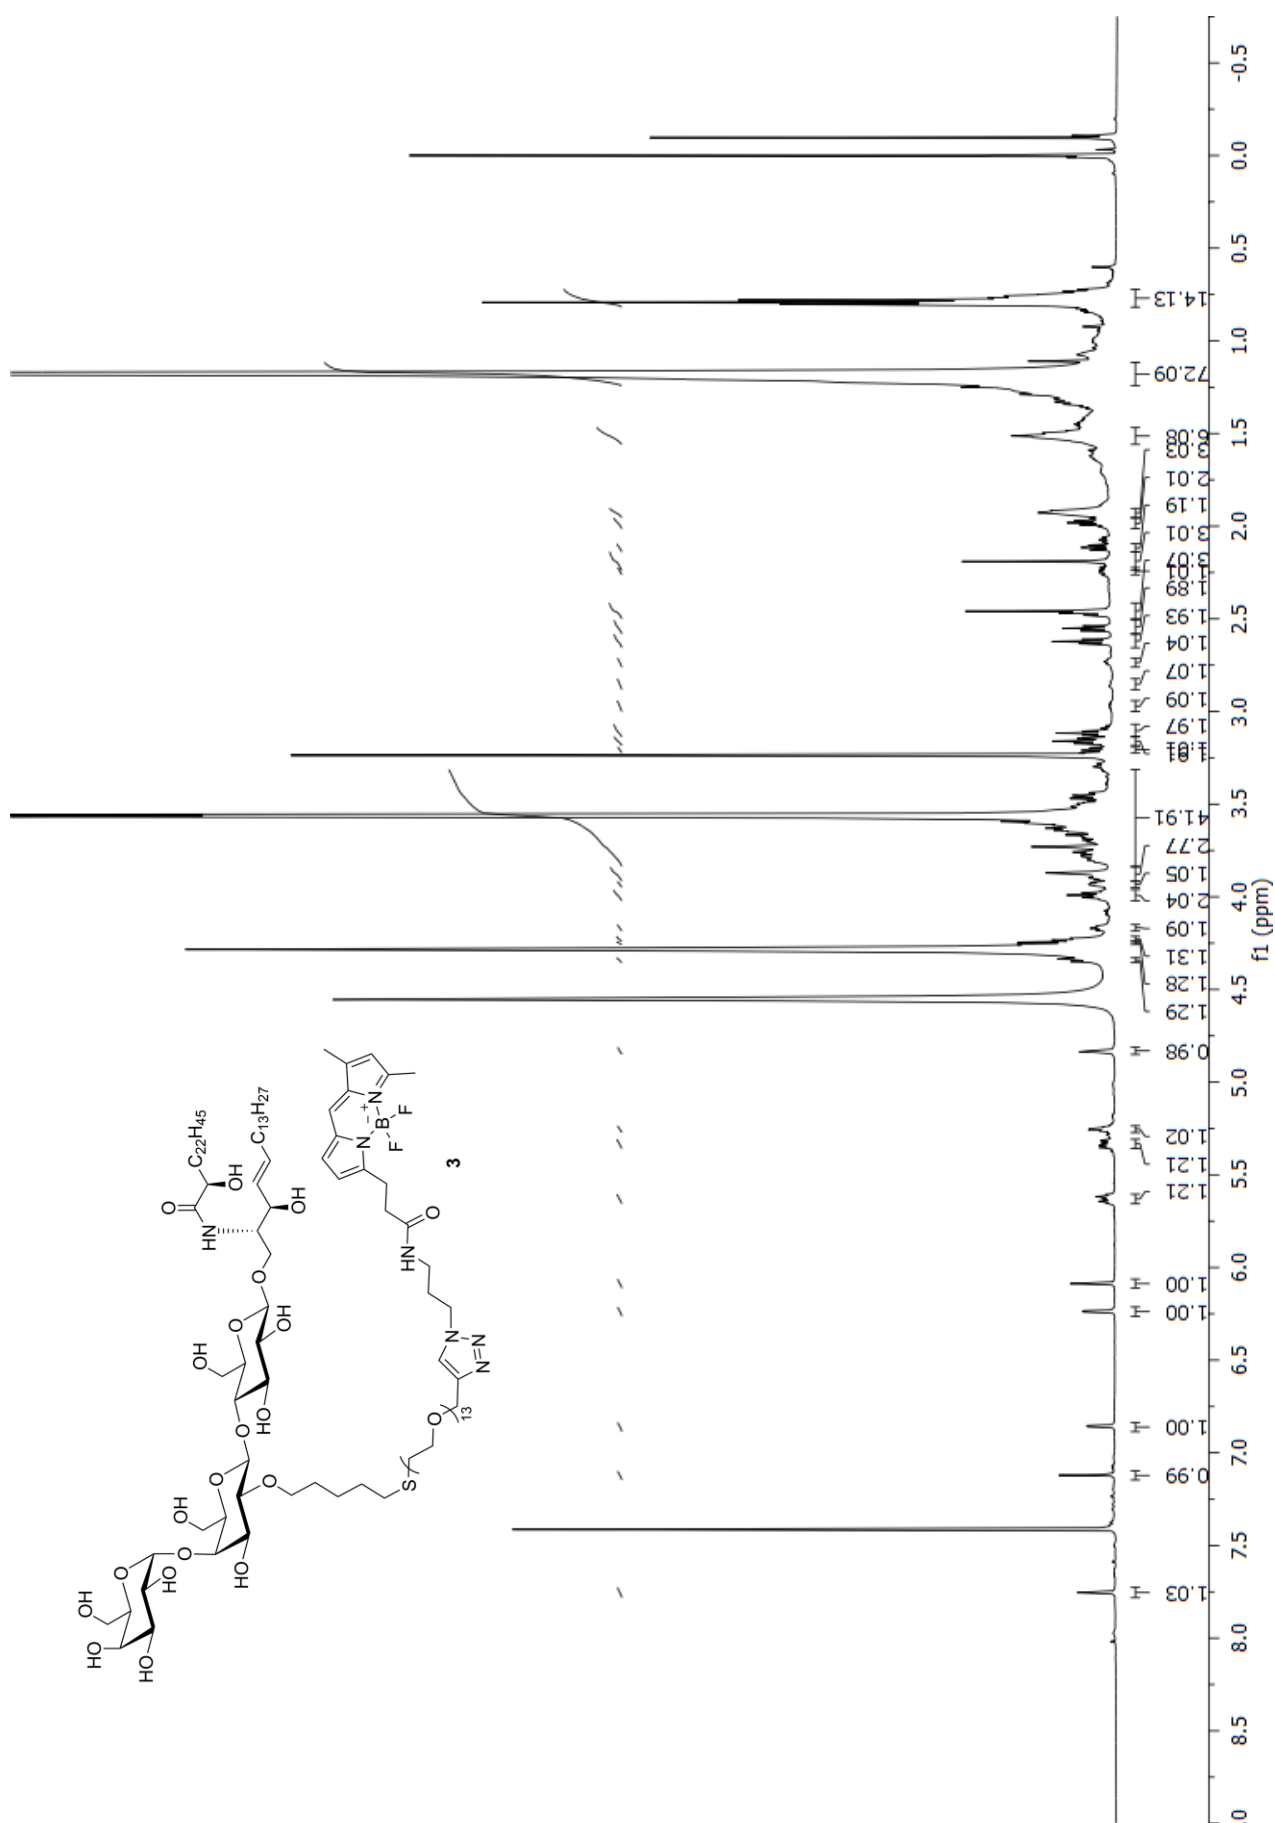

## SUPPORTING INFORMATION

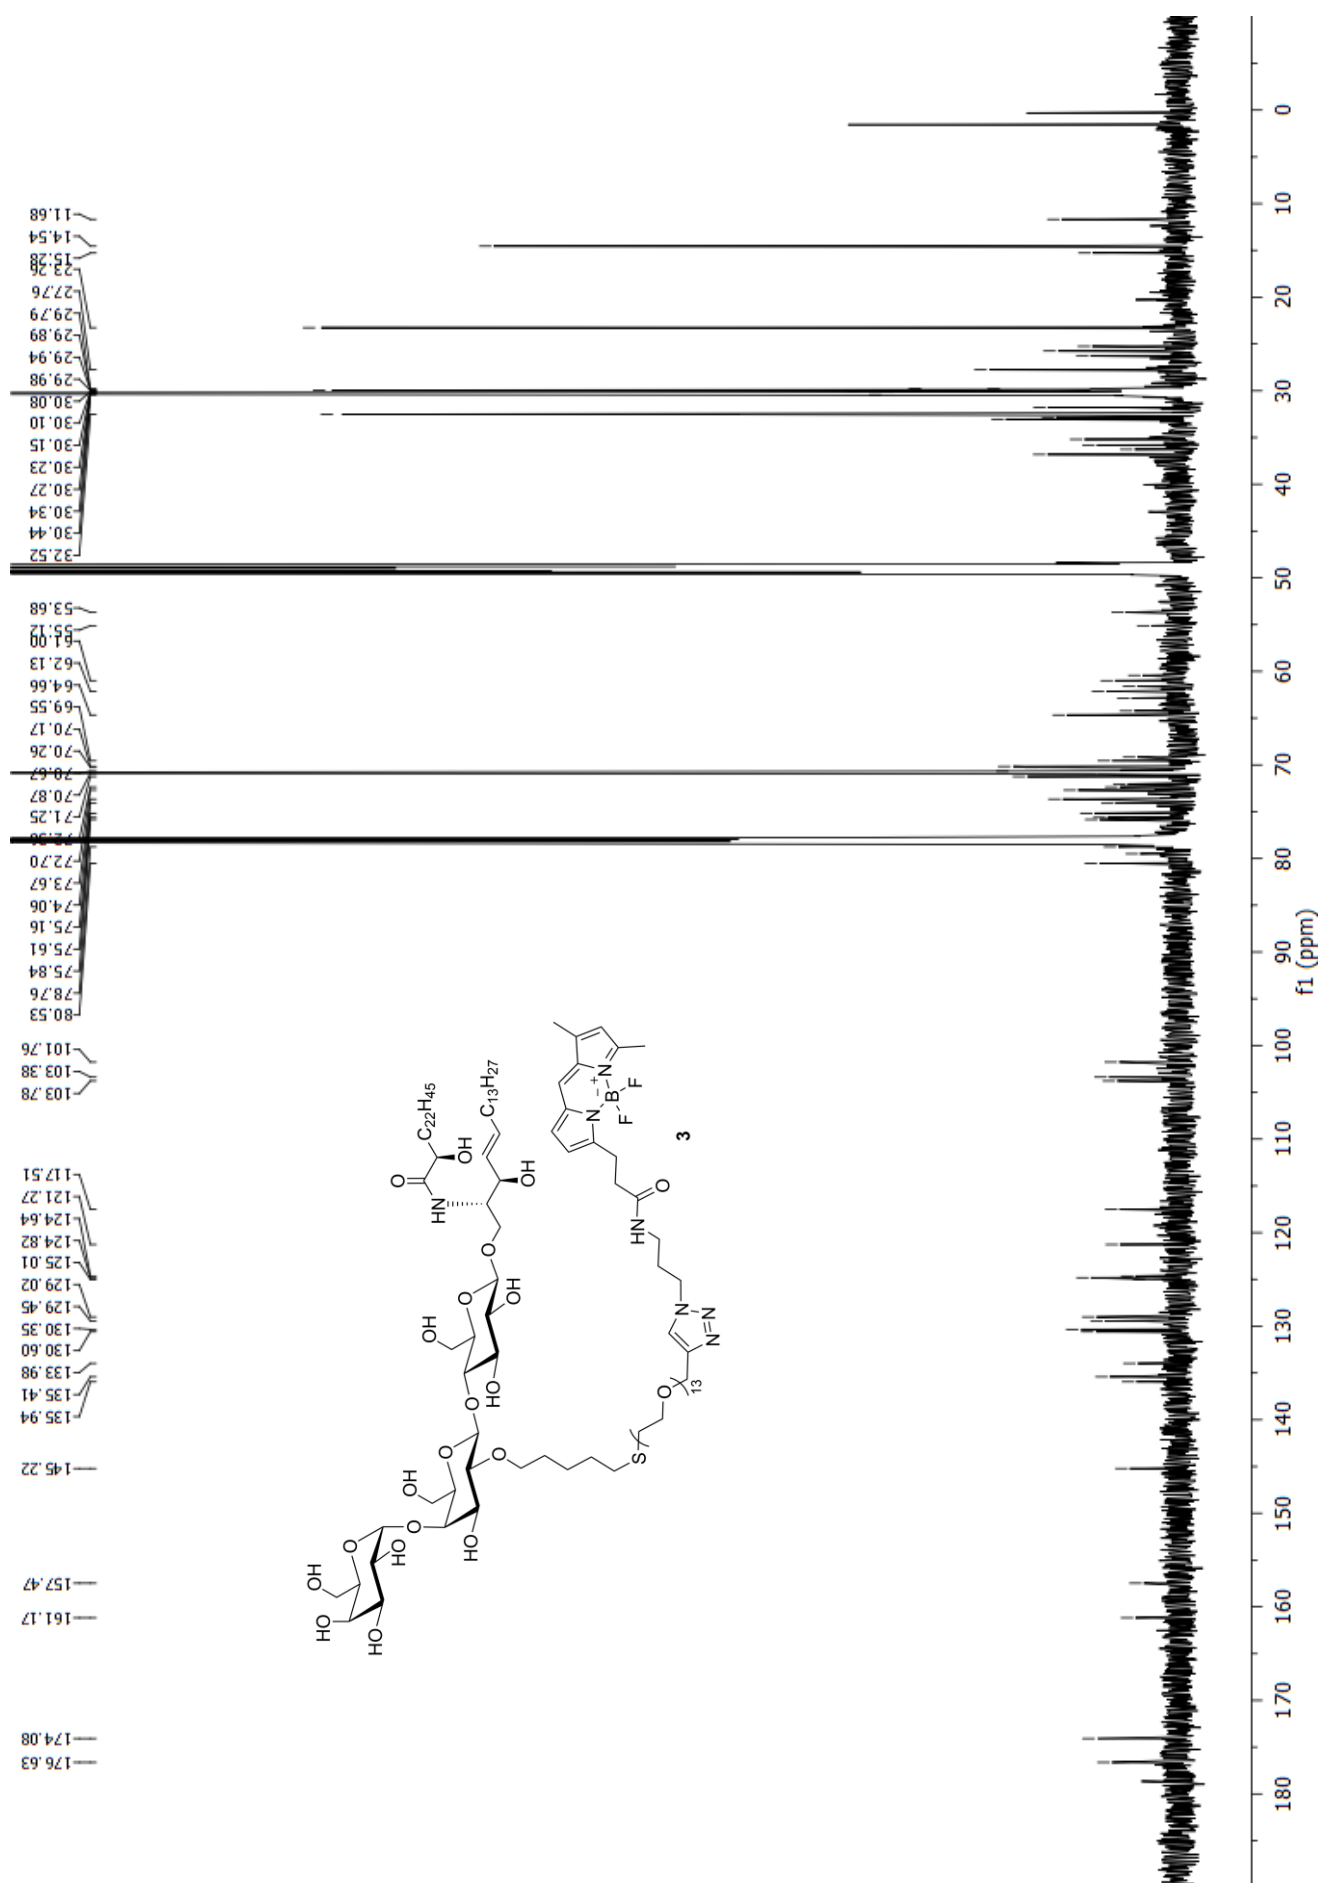

## SUPPORTING INFORMATION

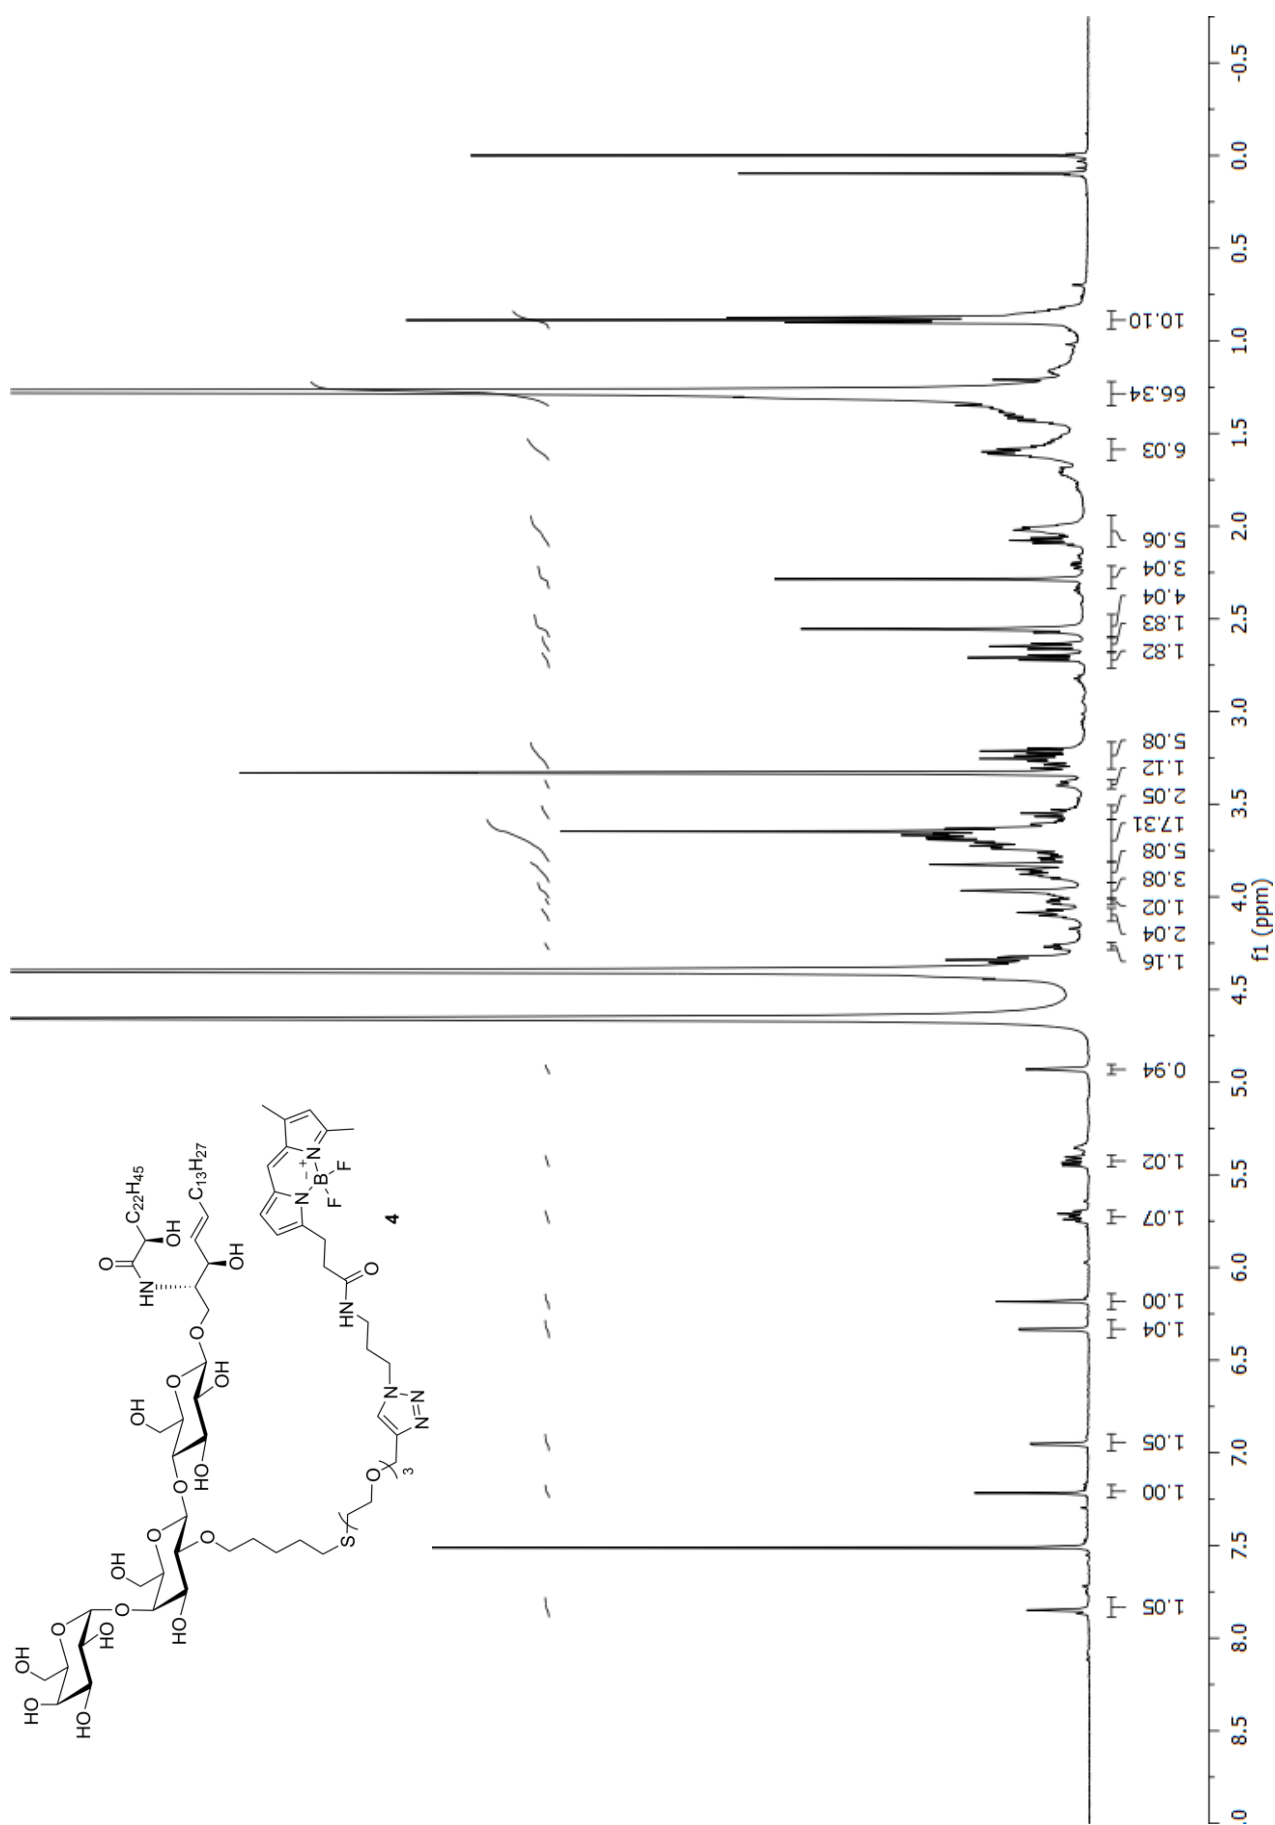

## SUPPORTING INFORMATION

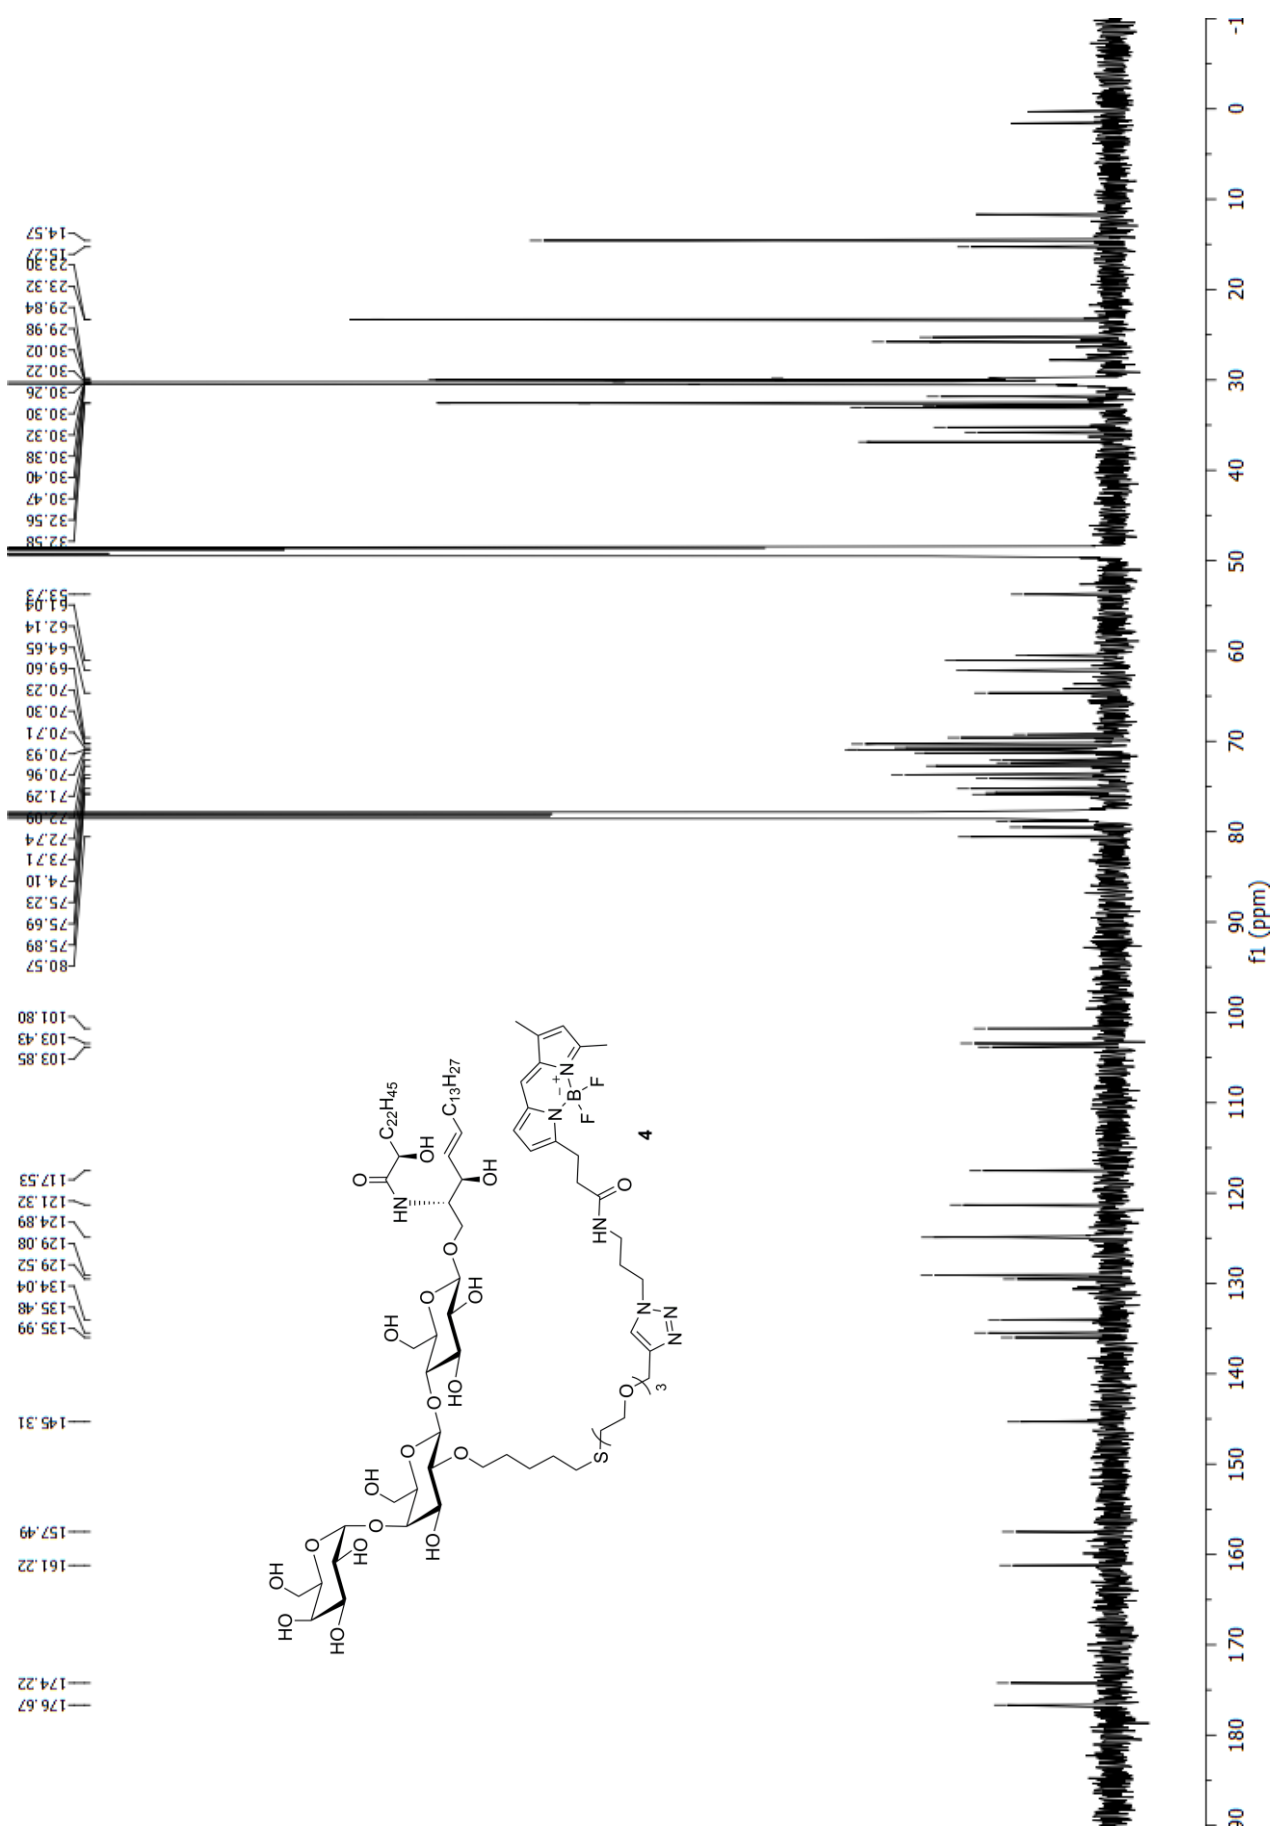



## SUPPORTING INFORMATION

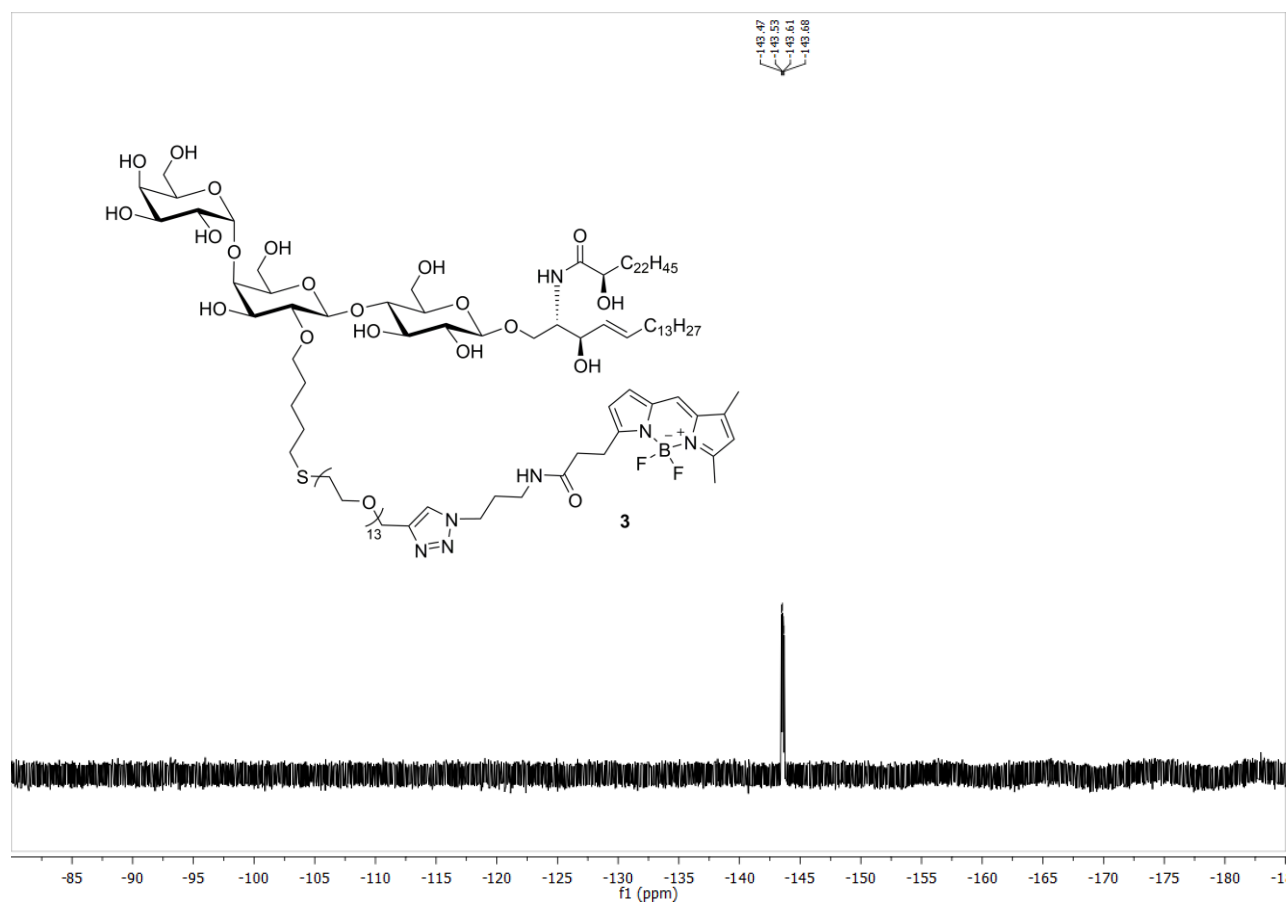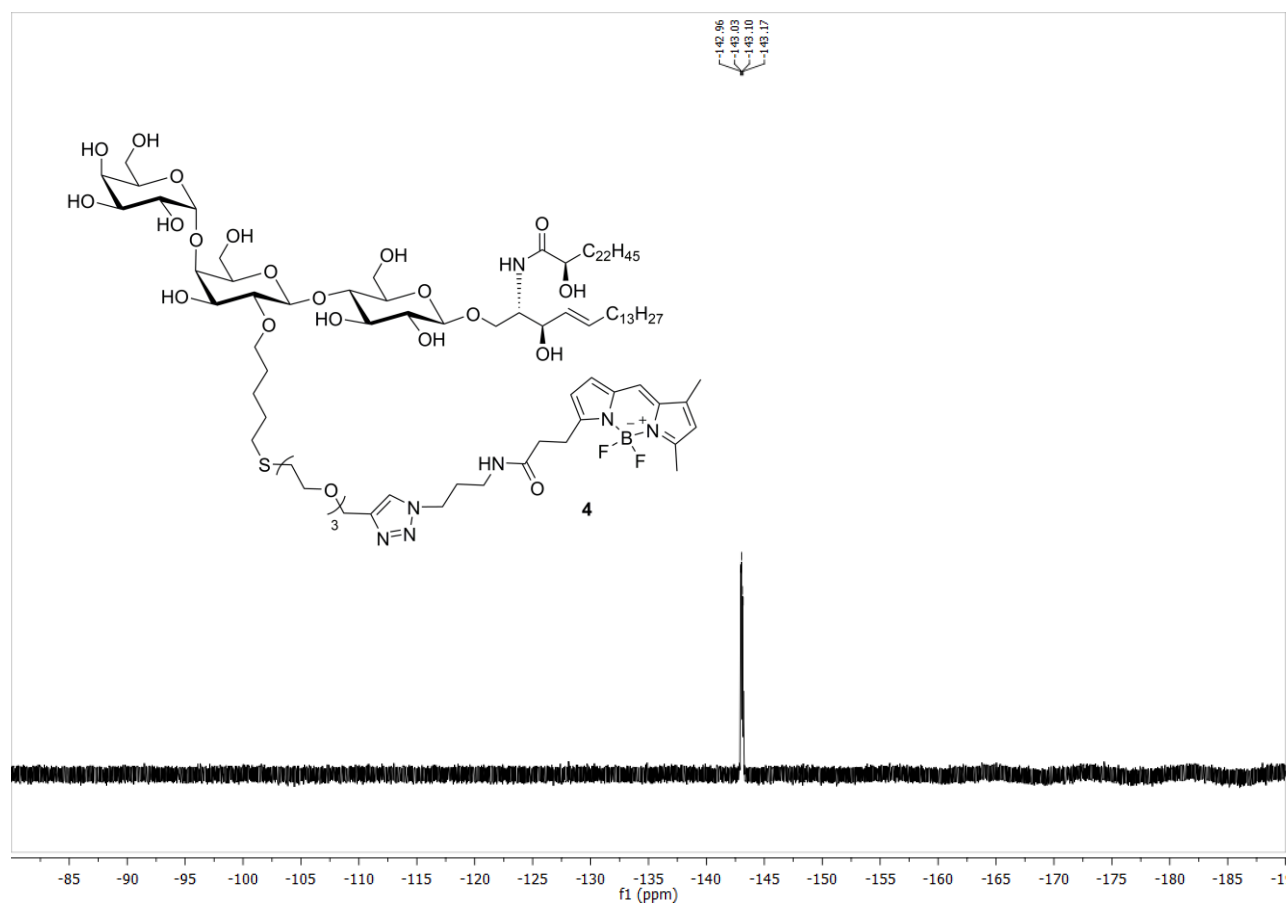

## SUPPORTING INFORMATION

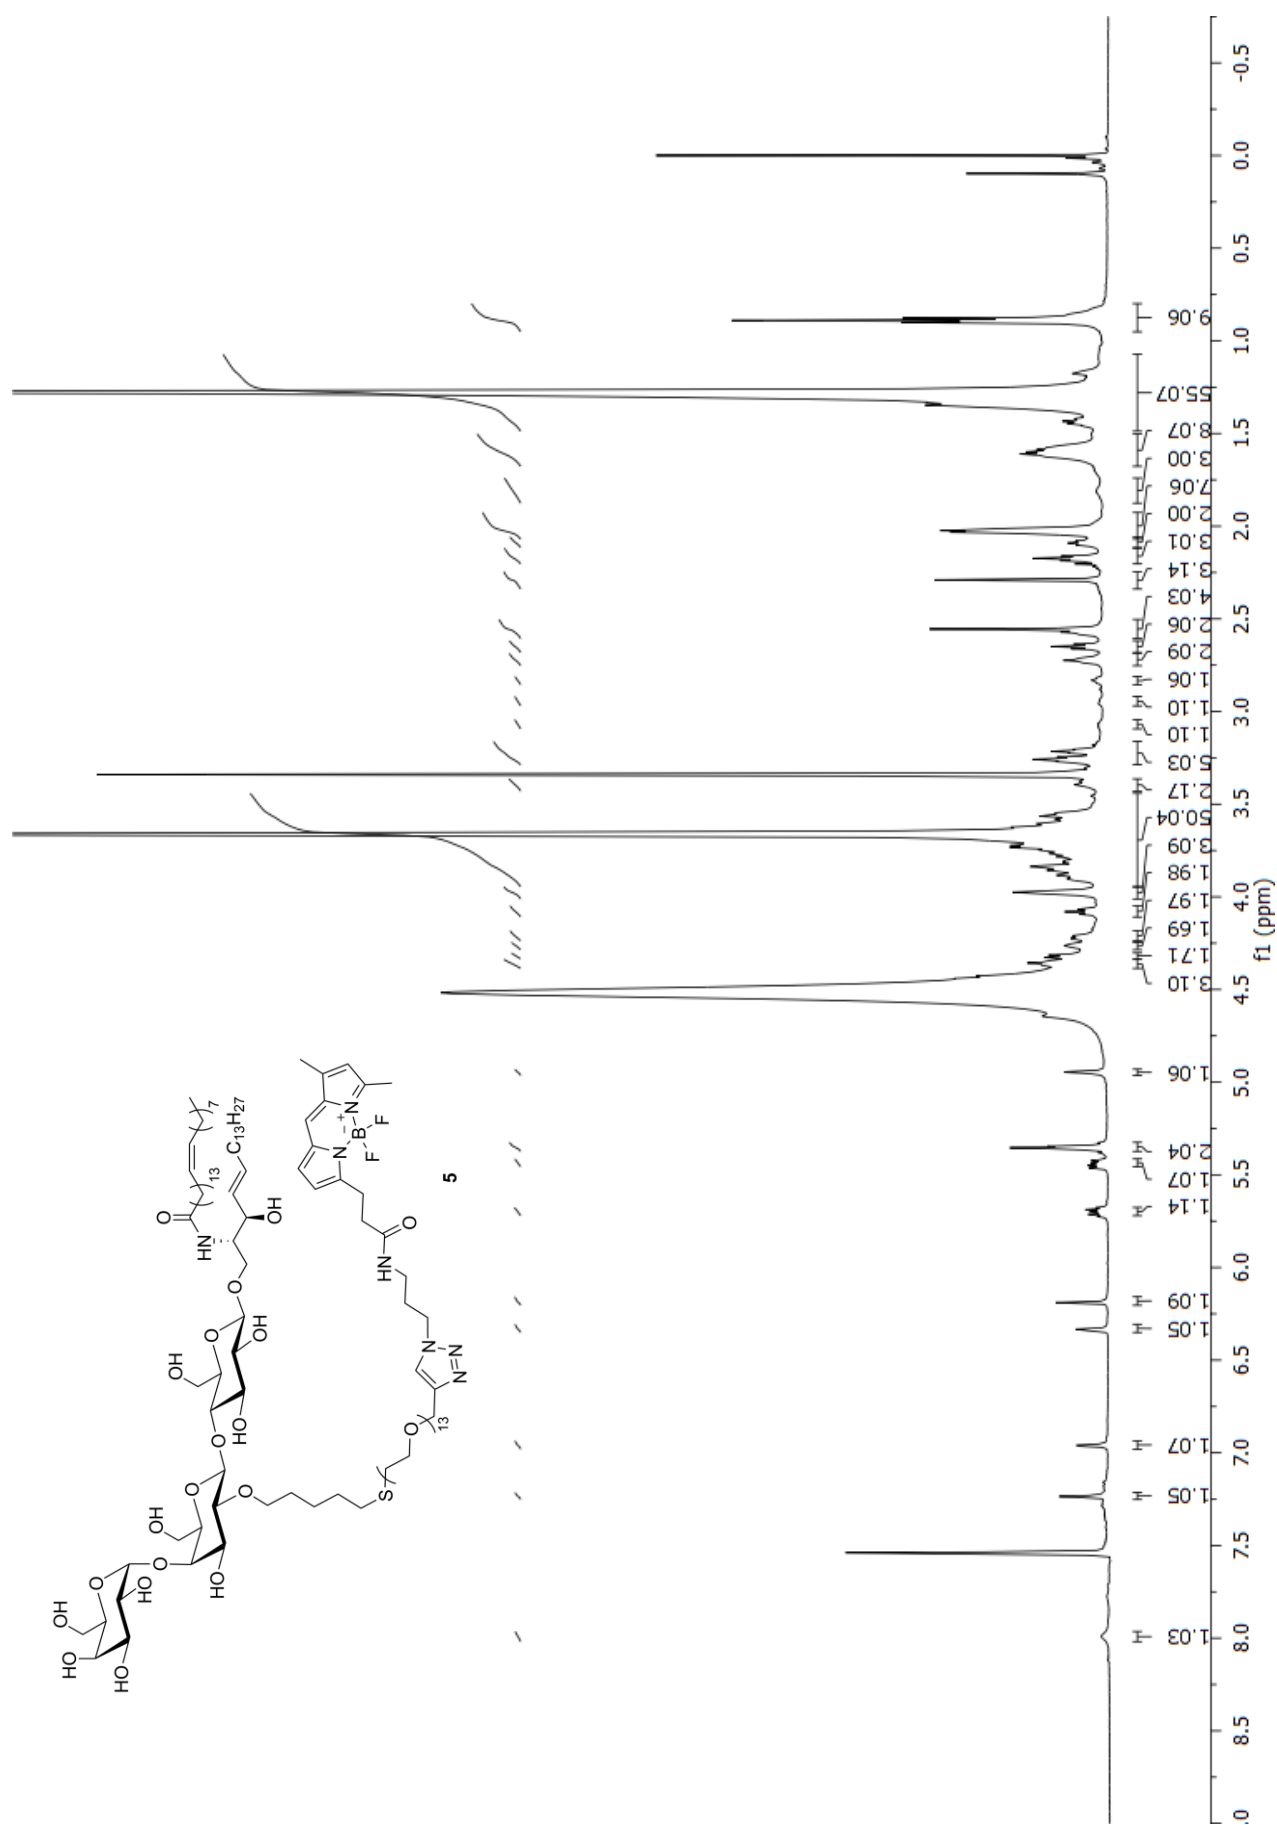

## SUPPORTING INFORMATION

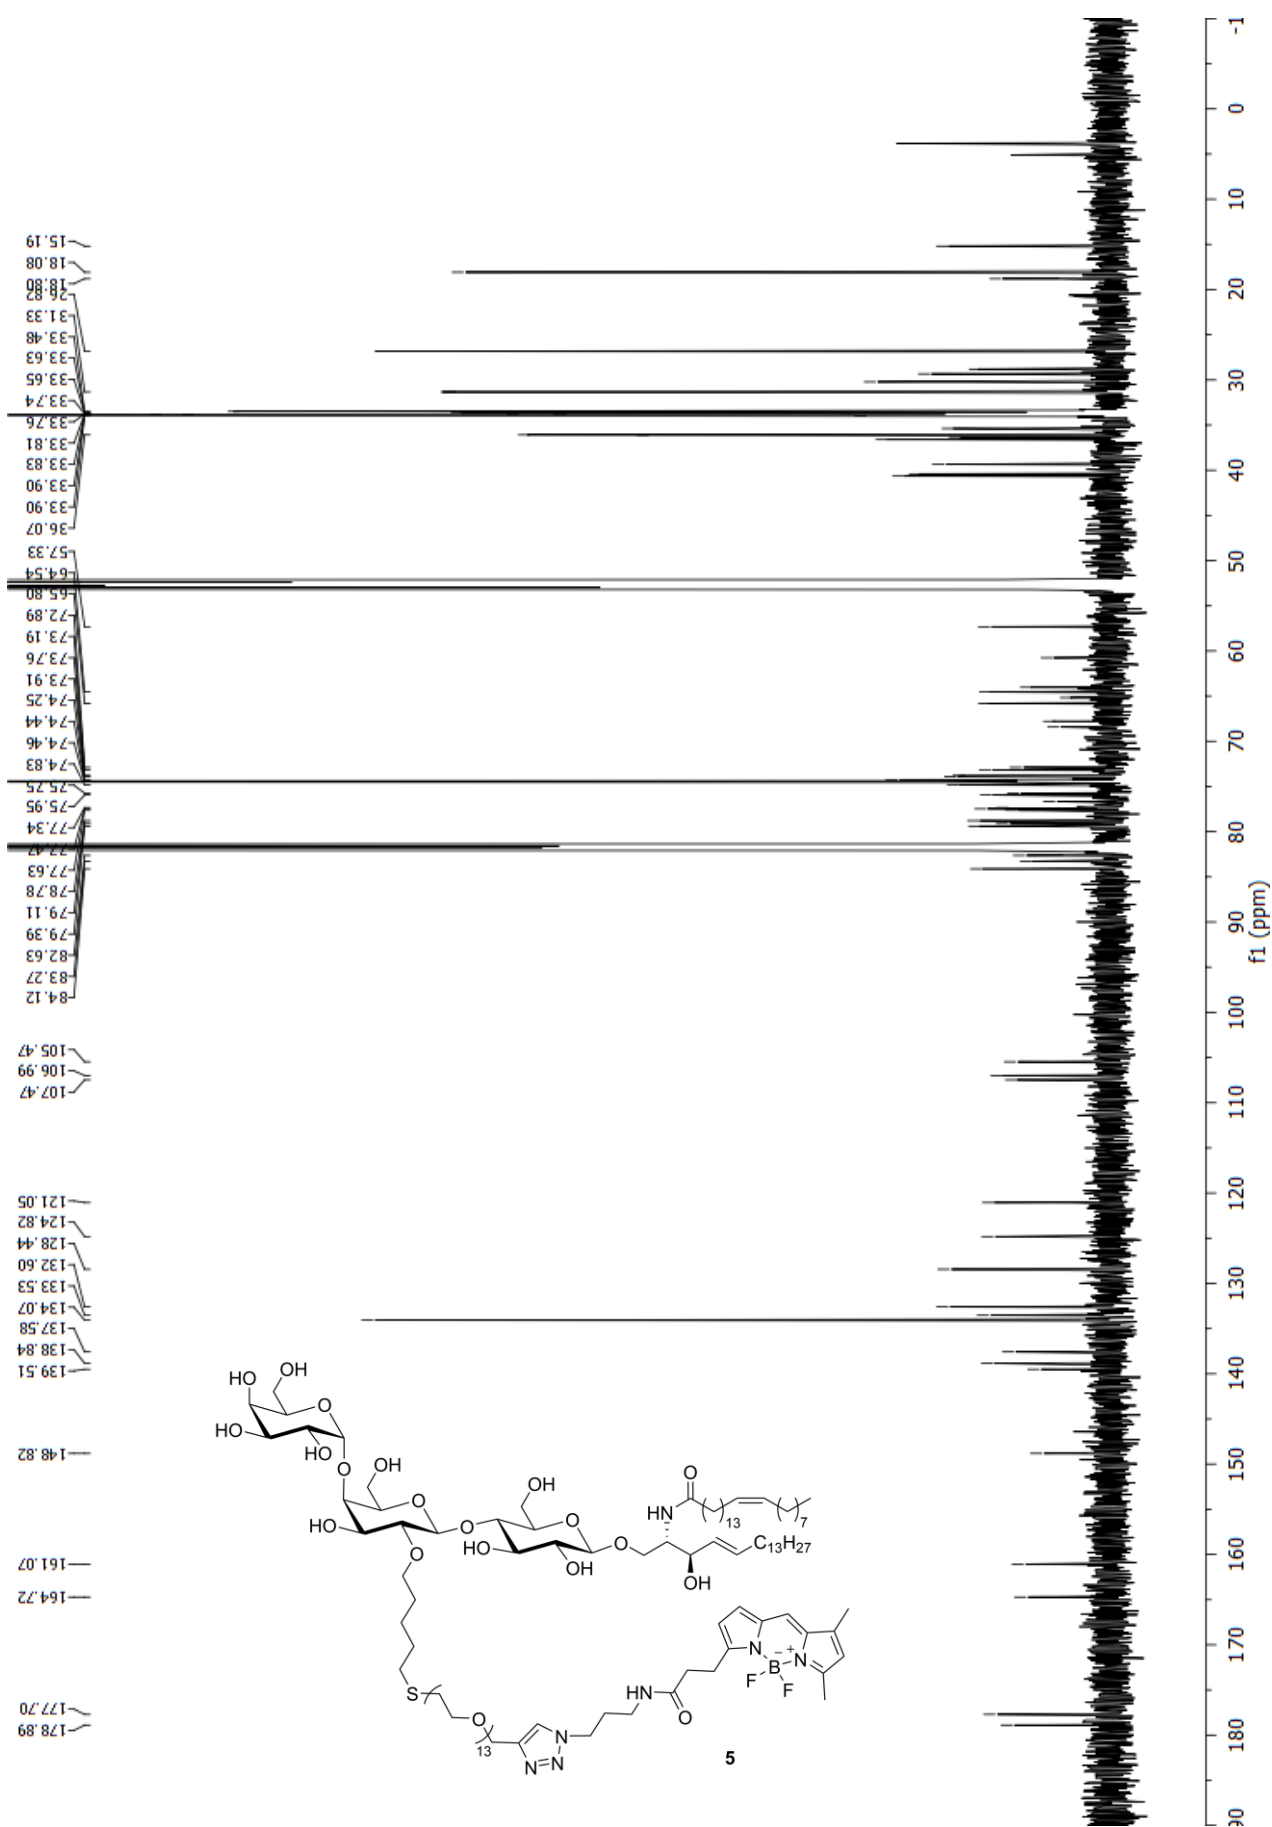



## SUPPORTING INFORMATION

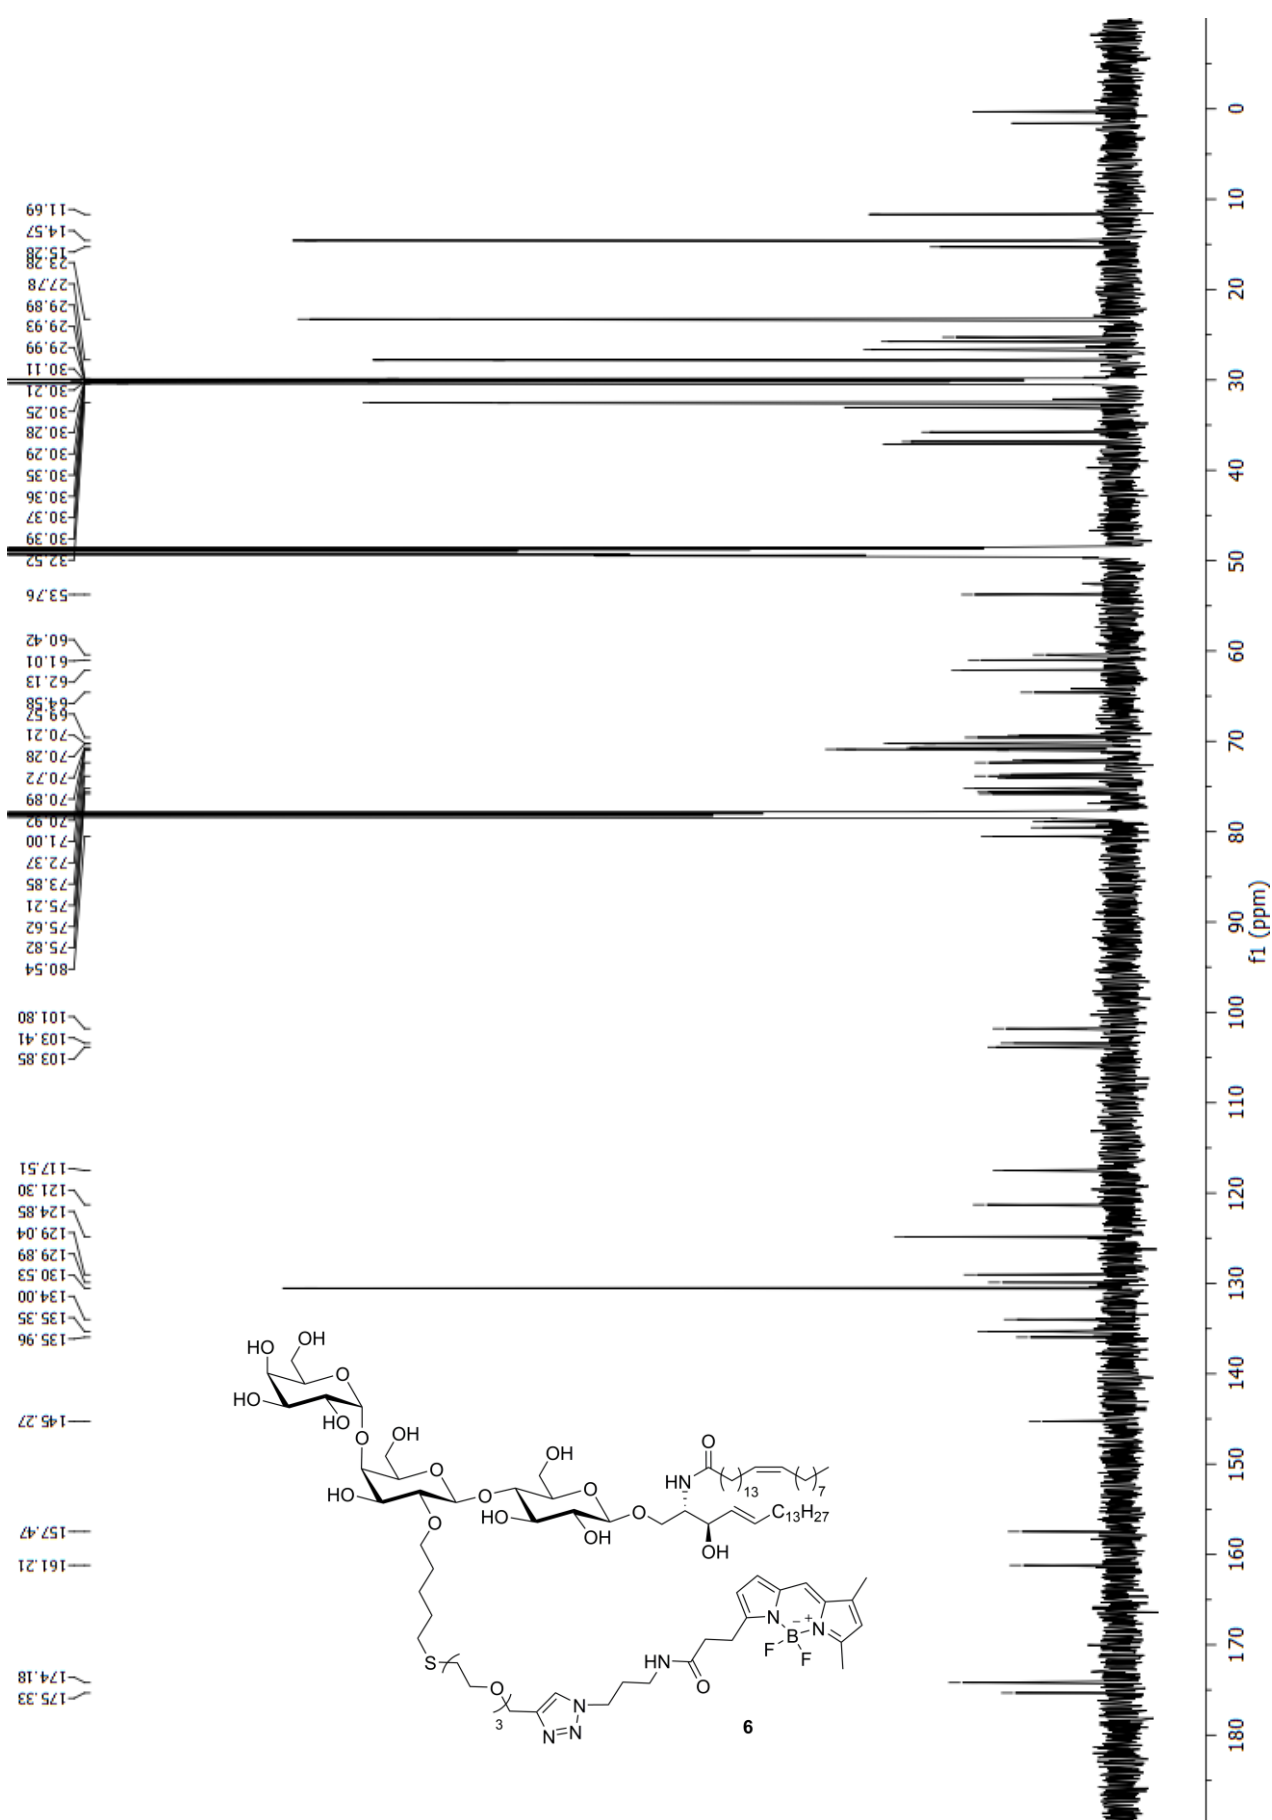

## SUPPORTING INFORMATION

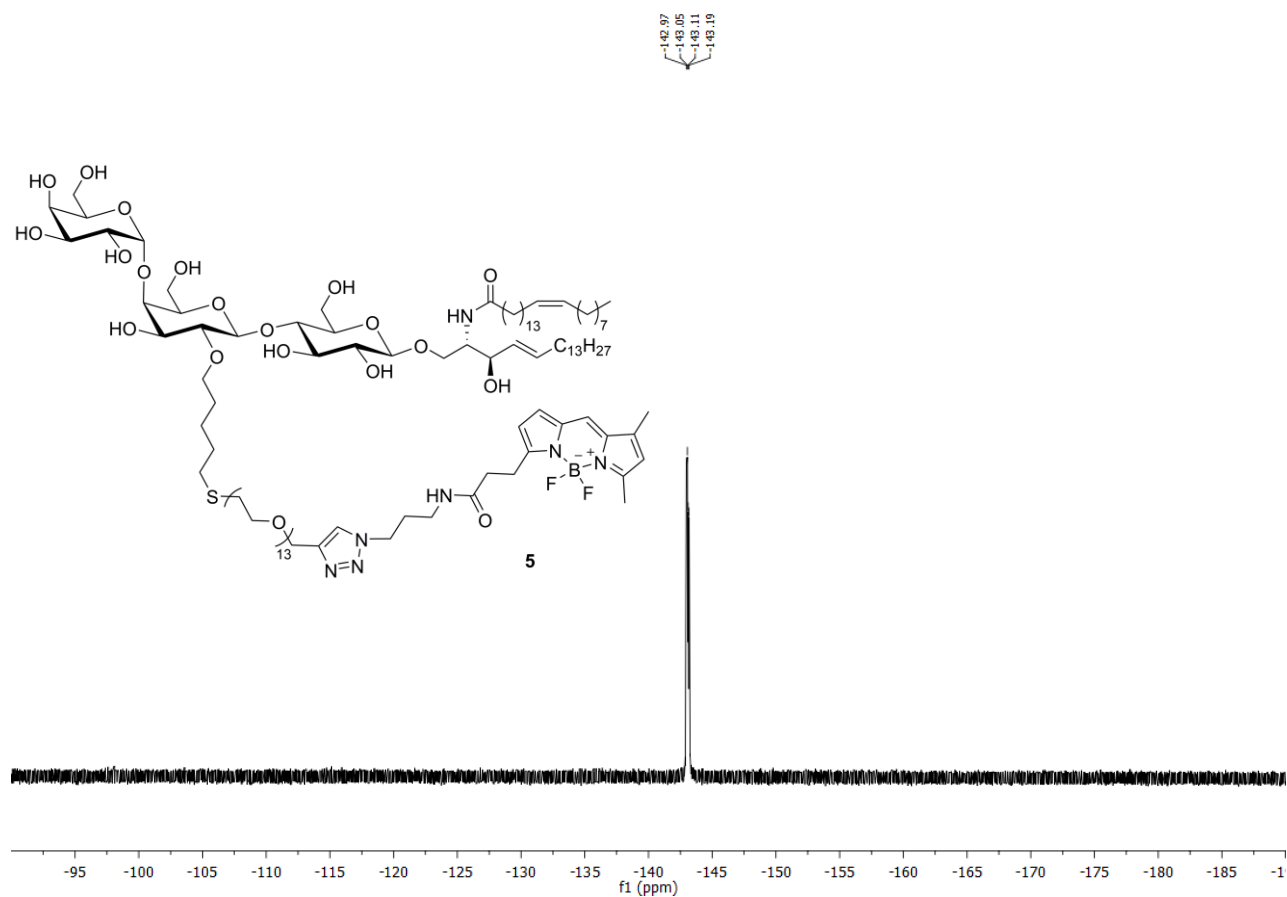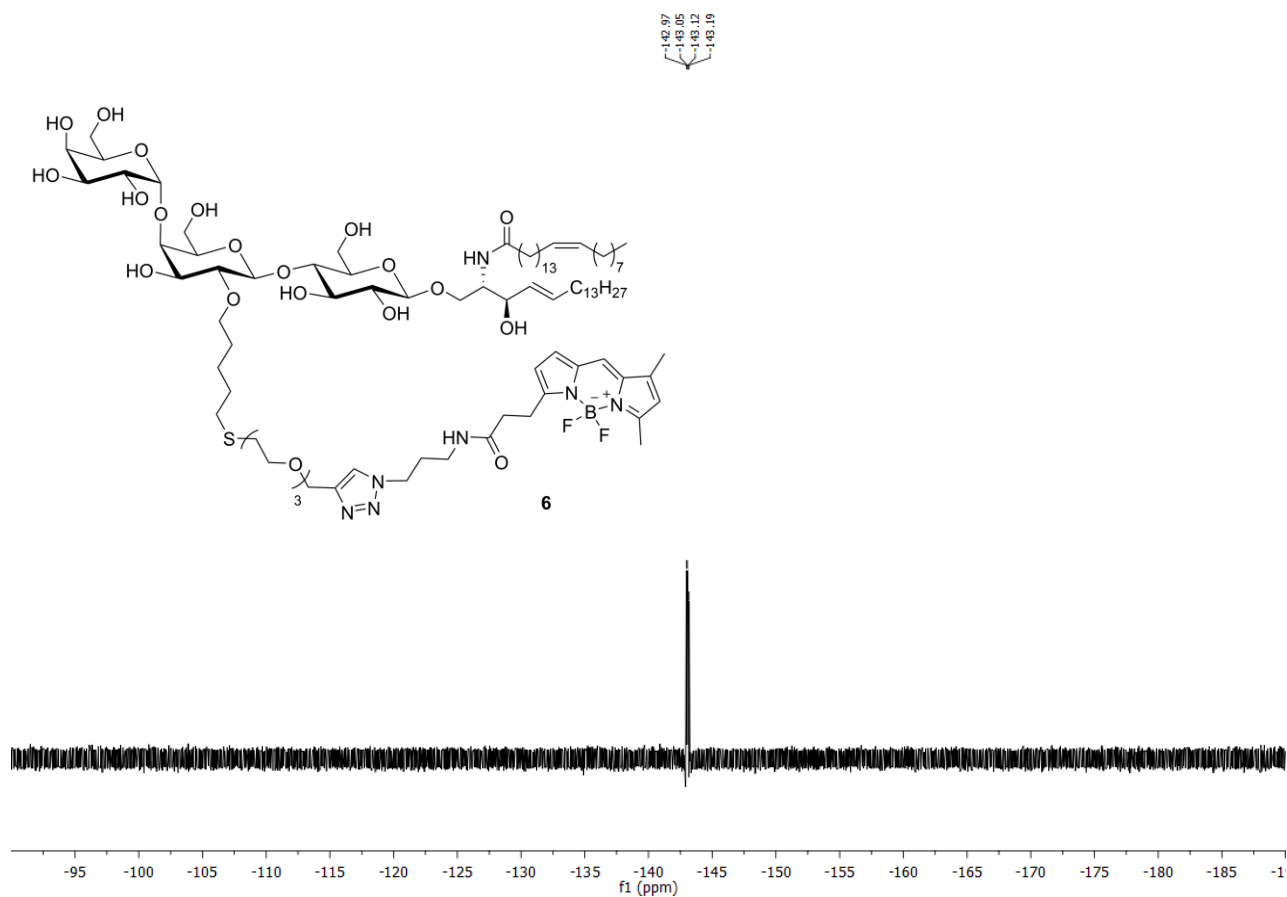



## SUPPORTING INFORMATION

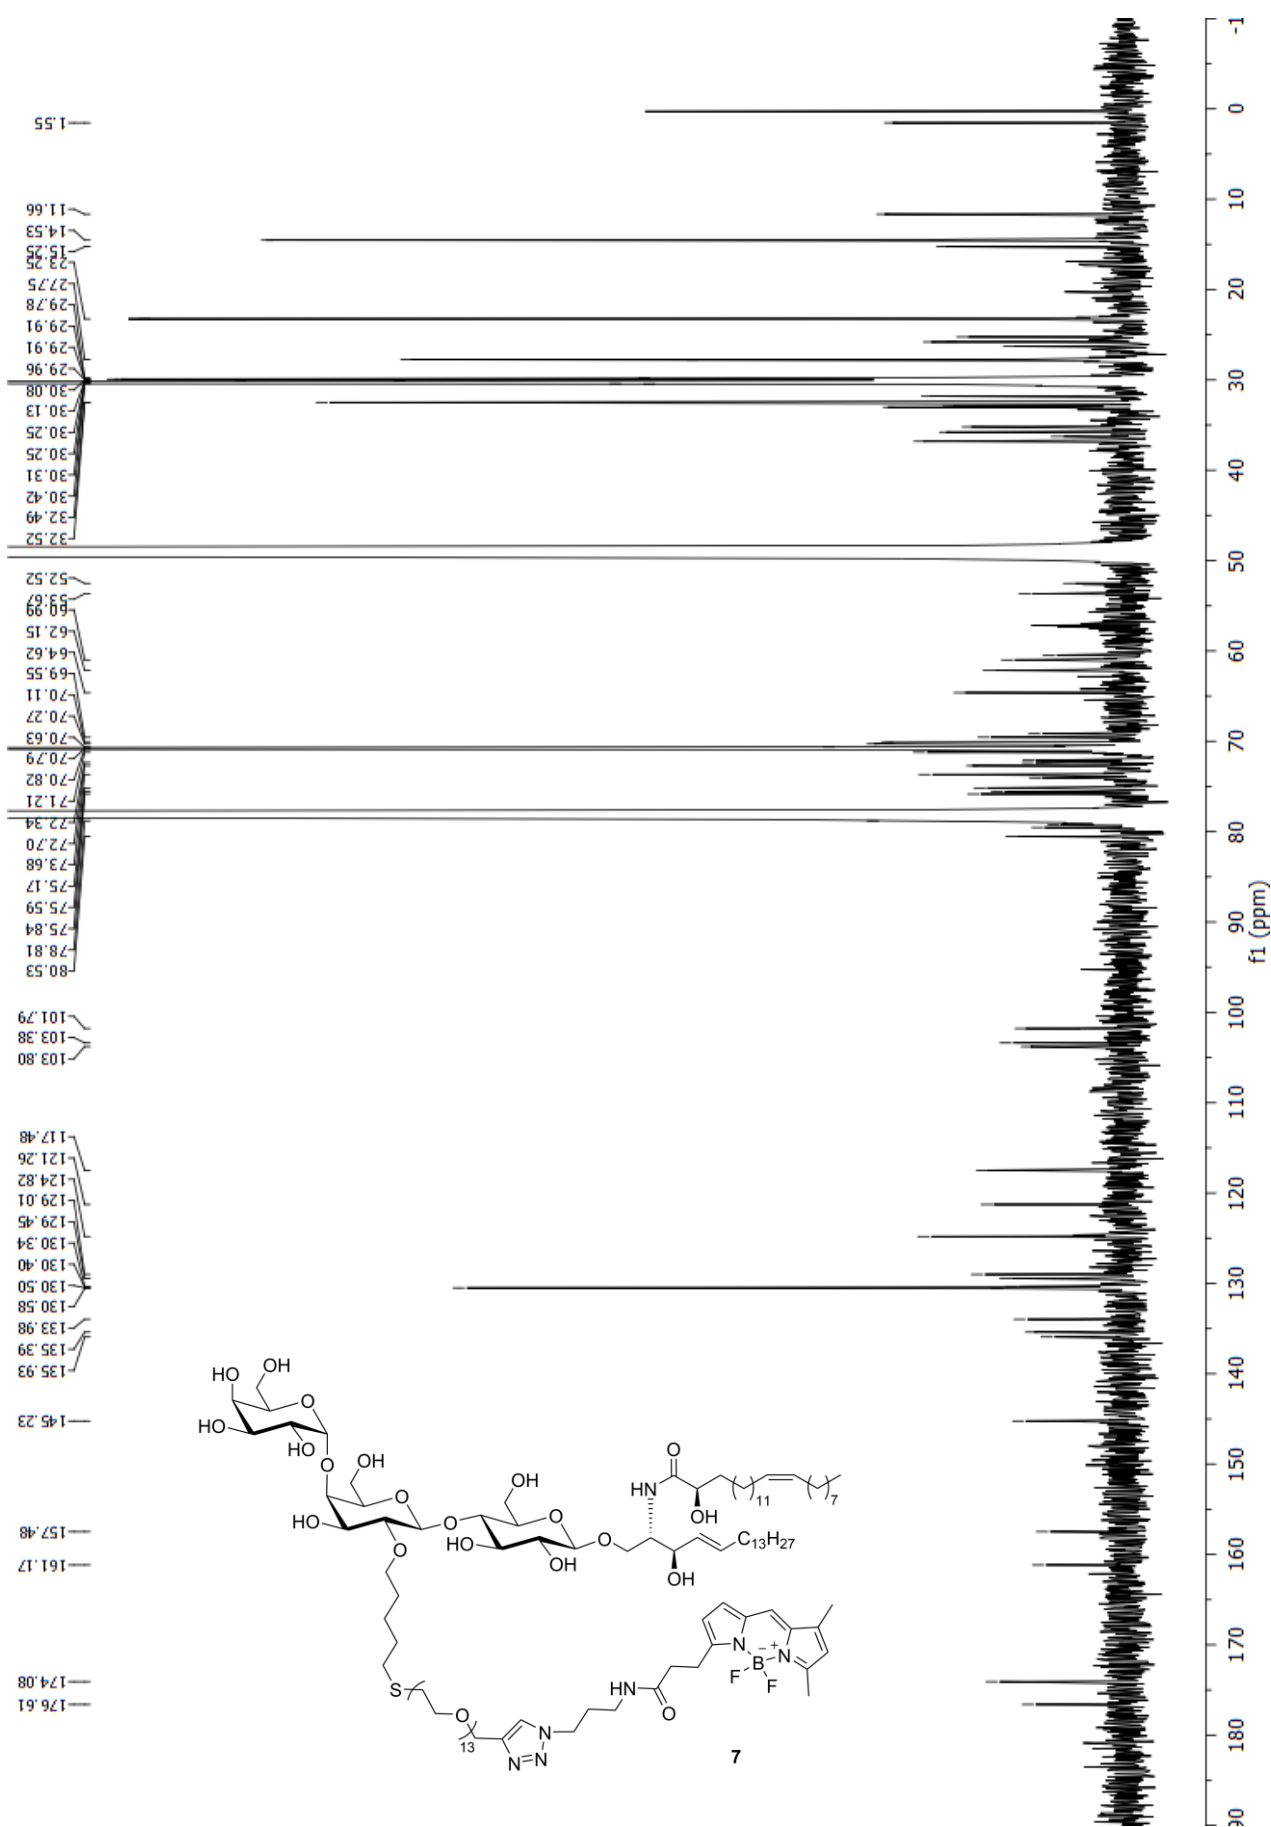



## SUPPORTING INFORMATION

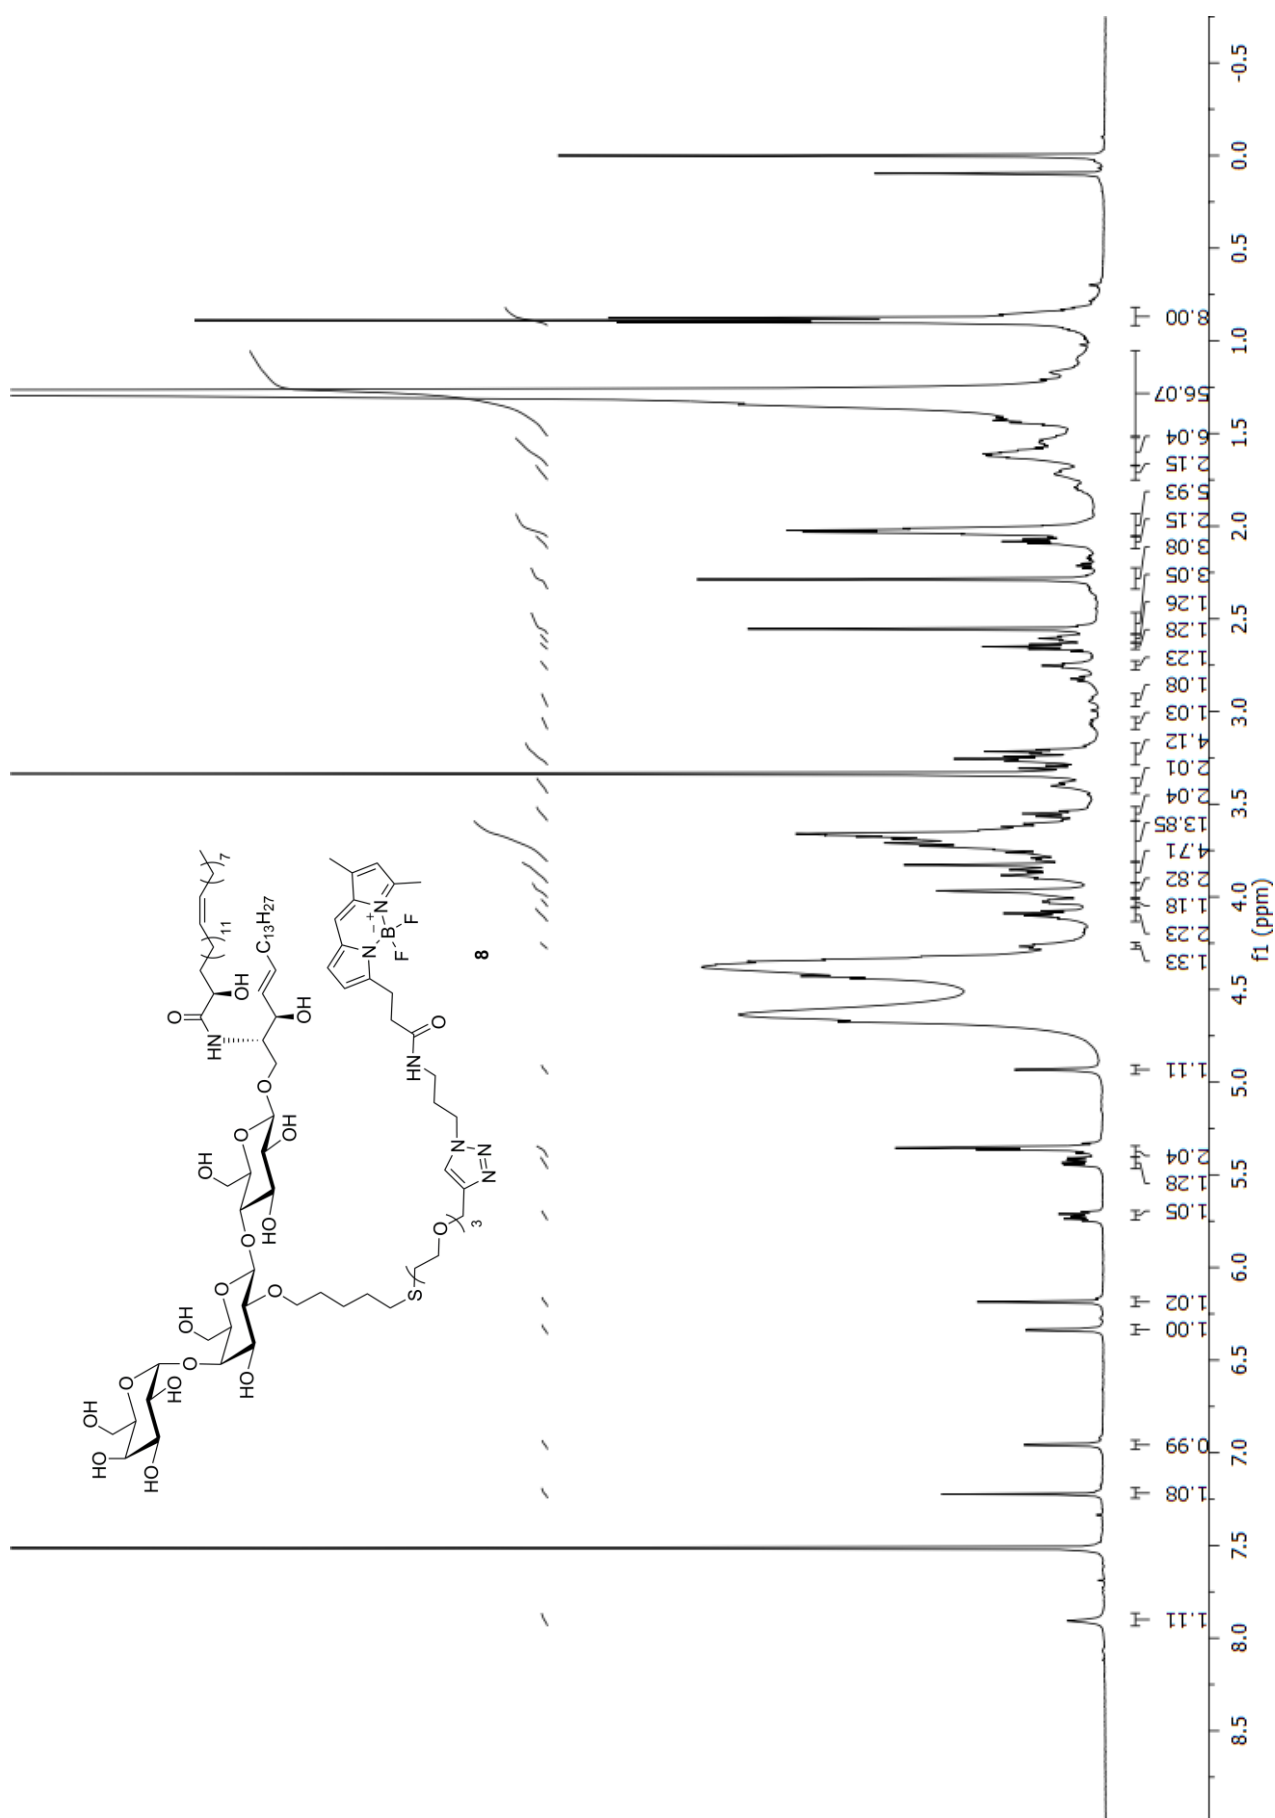

## SUPPORTING INFORMATION

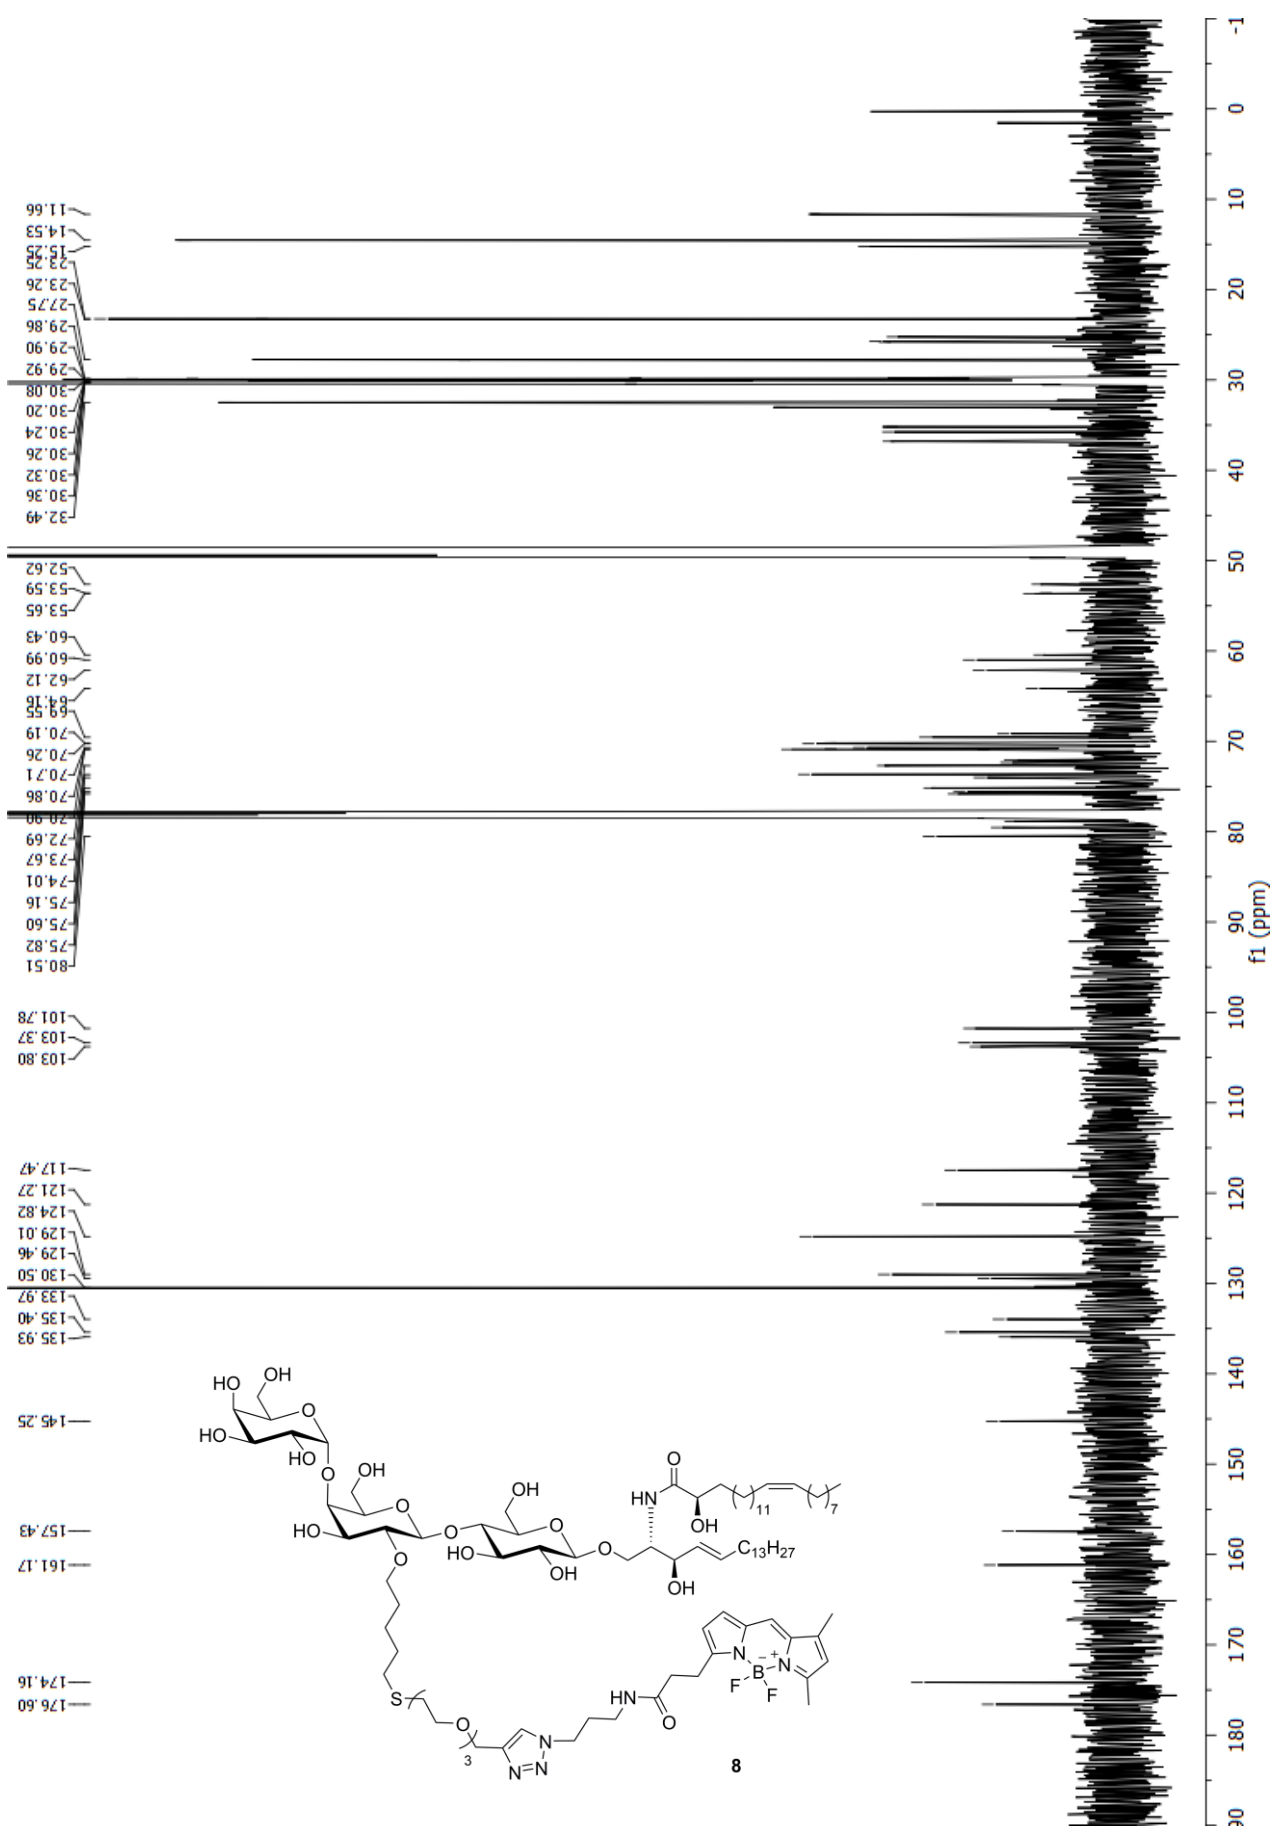

## SUPPORTING INFORMATION

-142.99  
-143.06  
-143.13  
-143.20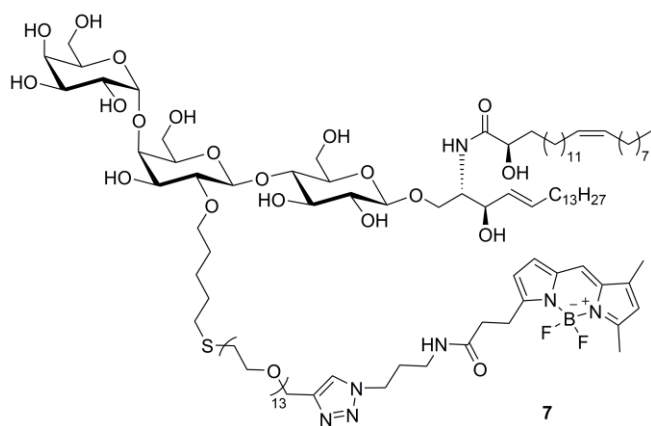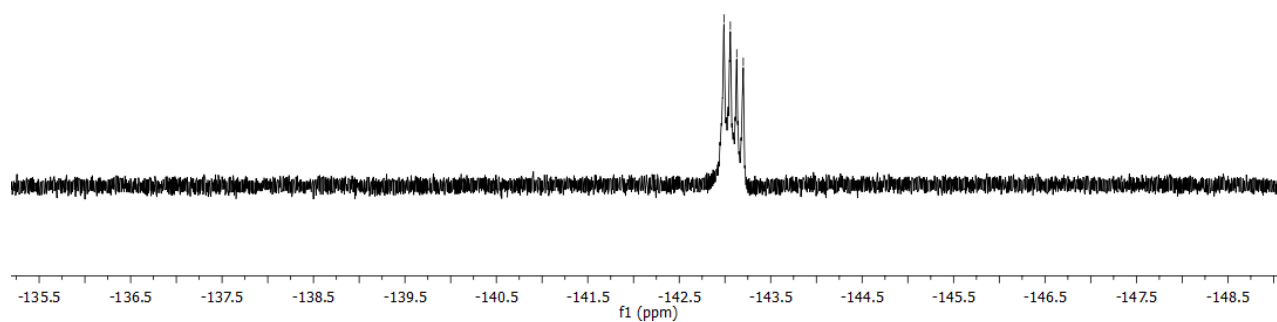-142.99  
-143.06  
-143.13  
-143.20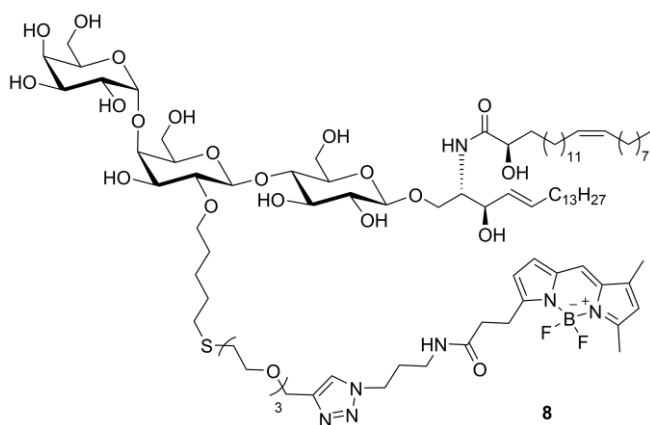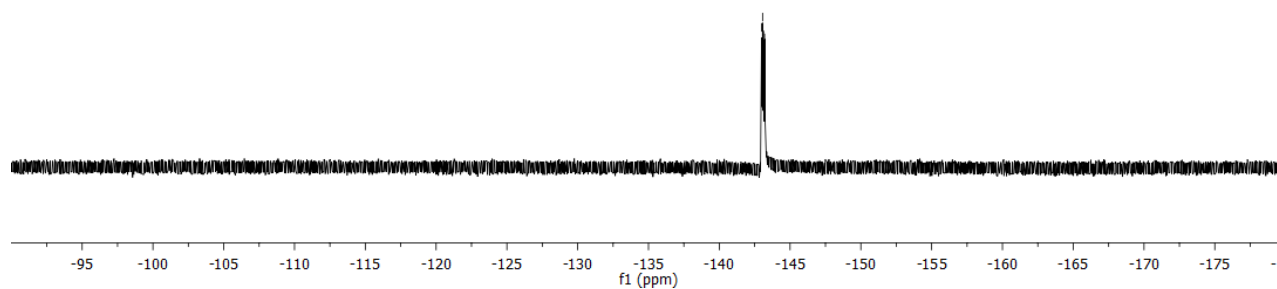

## SUPPORTING INFORMATION

**Materials**

1,2-Dioleoyl-*sn*-glycero-3-phosphocholine (DOPC), sphingomyelin from porcine brain (SM-porc), palmitoyl SM (C<sub>16:0</sub>), stearoyl SM (C<sub>18:0</sub>) and lignoceroyl SM (C<sub>24:0</sub>) were purchased from Avanti Polar Lipids (Alabaster, AL). Arachidoyl SM (C<sub>20:0</sub>) and behenoyl SM (C<sub>22:0</sub>) were from Matreya (State College, PA). Cholesterol (Chol) and sulforhodamine-1,2-dihexanoyl-*sn*-glycero-3-phosphoethanolamine (Texas Red-DHPE) were obtained from Sigma-Aldrich (Taufkirchen, Germany). Dy731-DOPE was synthesized as described previously.<sup>[8]</sup> Bovine serum albumin (BSA) was purchased from Carl Roth GmbH (Karlsruhe, Germany). STxB-Cy5 was purified as described previously.<sup>[9]</sup>

**Preparation of giant unilamellar vesicles (GUVs)**

GUVs were prepared by electroformation. Each lipid composition (total lipid: 1 mg) was dissolved in chloroform/methanol (2:1) and the solution was deposited equally on two indium tin oxide (ITO) cover slides that were preheated to 55 °C. The solvent was removed under reduced pressure for 3 h at 55 °C. A Teflon ring was placed between the two ITO slides and the chamber was filled with 1.7 mL sucrose solution (298 mOsmol/L). An AC field was applied ( $U = 1.66 V_{pp}$ ,  $f = 12$  Hz) for 3 h at 55 °C. Resulting GUVs were stored at room temperature before use.

**Fluorescence microscopy of GUVs**

A petri dish was passivated with BSA (8 mg/mL in phosphate buffered saline (PBS): 1.5 mM KH<sub>2</sub>PO<sub>4</sub>, 8.1 mM Na<sub>2</sub>HPO<sub>4</sub>, 2.7 mM KCl, 136.9 mM NaCl, pH 7.4) at 4 °C overnight. After removing the BSA solution, the petri dish was filled with 2 mL PBS and washed with 50 mL PBS. 100 µL of the GUV solution were sedimented through a PBS filled 5 mL tip into the petri dish. After 10 min, the GUVs were analyzed with a confocal laser scanning microscope (LSM 710 or 880, Carl Zeiss, Jena, Germany). Both microscopes were equipped with a W Plan-Apochromat 40 × objective and an Ar 488 nm, a DPSS 561 nm and a HeNe 633 nm laser line. Fluorescence intensities were detected in a range of 500-620 nm (BODIPY), 565-620 nm (Texas Red-DHPE), and 640-758 nm (Dy731, Cy5-STxB).

**Self-quenching of BODIPY labeled Gb<sub>3</sub>**

Different amounts of **1** were reconstituted in DOPC GUVs in ultrapure water at room temperature (lipid concentration 16 µM), and the fluorescence intensity at 488 nm was readout before ( $F$ ) and after ( $F_0$ ) Triton-X addition.<sup>[10]</sup>

## SUPPORTING INFORMATION

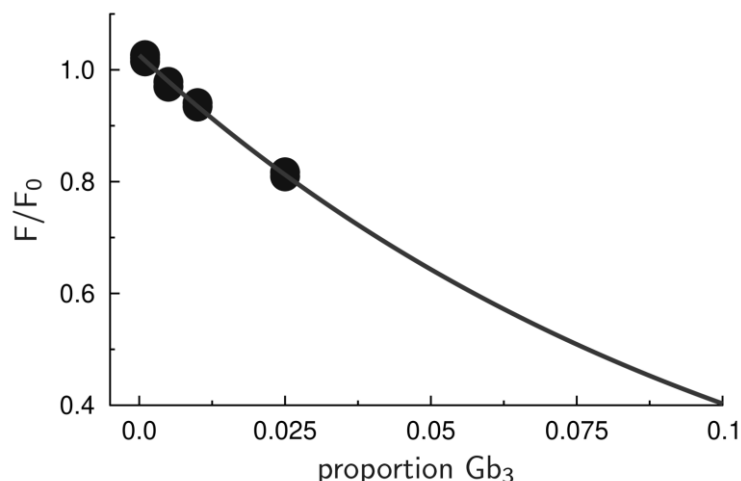

**Figure S1.** Self-quenching of BODIPY labeled Gb<sub>3</sub> (1). The fluorescence intensity of DOPC GUVs with different amounts of Gb<sub>3</sub> was readout before Triton-X addition ( $F$ ) and after ( $F_0$ ).

### $I_0$ distribution of different Gb<sub>3</sub> species with a PEG<sub>3</sub> linker (SM-porc)

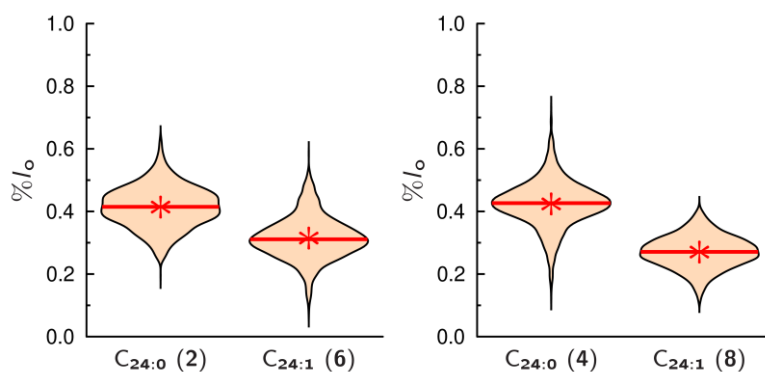

**Figure S2.**  $I_0$  distribution of different Gb<sub>3</sub> species with a PEG<sub>3</sub> linker in GUVs composed of DOPC/SM-porc/Chol/Gb<sub>3</sub>/Dy731 (39/39/20/1/1). The partition of Gb<sub>3</sub> sphingolipids with a saturated fatty acid (C<sub>24:0</sub>) was compared with those carrying a monounsaturated fatty acid (C<sub>24:1</sub>). The mean values are given as a red star, while the solid red lines show the median value, the number of line scans are given in Table S1.

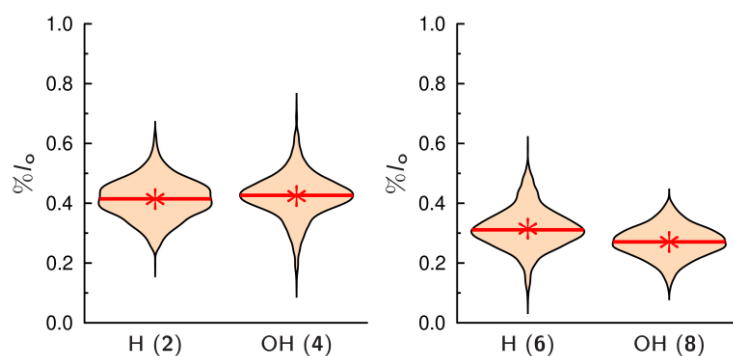

**Figure S3.**  $I_0$  distribution of different Gb<sub>3</sub> species with a PEG<sub>3</sub> linker in GUVs composed of DOPC/SM-porc/Chol/Gb<sub>3</sub>/Dy731 (39/39/20/1/1). The partition of Gb<sub>3</sub> sphingolipids with no hydroxylation (H) was compared with those carrying an  $\alpha$ -hydroxylation (OH). The mean values are given as red stars, while the red solid lines show the median values, the number of line scans are given in Table S1.

## SUPPORTING INFORMATION

***I<sub>o</sub>* distribution of different Gb<sub>3</sub> species with a PEG<sub>3</sub> linker (chemically defined SM)**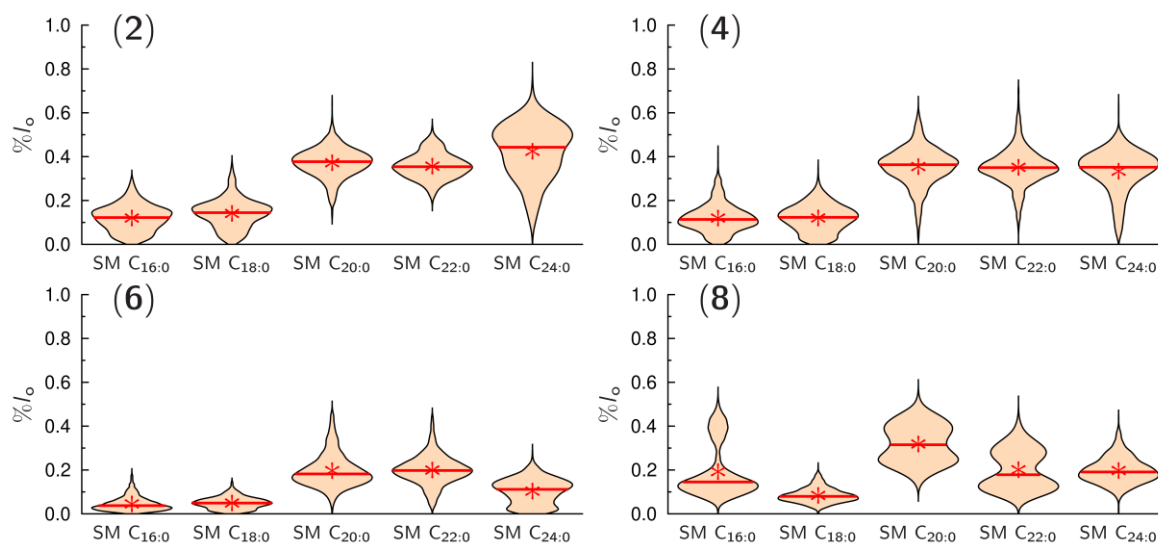

**Figure S4.** *I<sub>o</sub>* distribution of different Gb<sub>3</sub> species with a PEG<sub>3</sub> linker composed of DOPC/SM/Chol/Gb<sub>3</sub>/Dy731 (39/39/20/1/1). The partition of four different Gb<sub>3</sub> sphingolipids in *I<sub>o</sub>*/*I<sub>d</sub>* phase separated GUVs with different sphingomyelin species are shown: SM C<sub>16:0</sub> (palmitoyl SM), SM C<sub>18:0</sub> (stearoyl SM), SM C<sub>20:0</sub> (arachidoyl SM), SM C<sub>22:0</sub> (behenoyl SM) and SM C<sub>24:0</sub> (lignoceroyl SM). The mean values are given as red stars and the solid red lines show the median, the number of line scans ins given in Table S1.

**Table S1.** Mean values of the *I<sub>o</sub>* distributions (%*I<sub>o</sub>*) for the different Gb<sub>3</sub> glycosphingolipids with the PEG<sub>3</sub> linker in GUVs composed of DOPC/SM/Chol/Gb<sub>3</sub>/Dy731 (39/39/20/1/1) varying in the SM species: SM C<sub>16:0</sub> (palmitoyl SM), SM C<sub>18:0</sub> (stearoyl SM), SM C<sub>20:0</sub> (arachidoyl SM), SM C<sub>22:0</sub> (behenoyl SM) and SM C<sub>24:0</sub> (lignoceroyl SM). The errors are the standard deviation of the mean.

| Gb <sub>3</sub> | % <i>I<sub>o</sub></i> (SM C <sub>16:0</sub> ) ( <i>N</i> ) | % <i>I<sub>o</sub></i> (SM C <sub>18:0</sub> ) ( <i>N</i> ) | % <i>I<sub>o</sub></i> (SM C <sub>20:0</sub> ) ( <i>N</i> ) | % <i>I<sub>o</sub></i> (SM C <sub>22:0</sub> ) ( <i>N</i> ) | % <i>I<sub>o</sub></i> (SM C <sub>24:0</sub> ) ( <i>N</i> ) |
|-----------------|-------------------------------------------------------------|-------------------------------------------------------------|-------------------------------------------------------------|-------------------------------------------------------------|-------------------------------------------------------------|
| 2               | 0.12 ± 0.06 (1890)                                          | 0.14 ± 0.07 (1539)                                          | 0.37 ± 0.07 (2188)                                          | 0.36 ± 0.06 (2363)                                          | 0.42 ± 0.13 (1695)                                          |
| 4               | 0.12 ± 0.07 (2769)                                          | 0.12 ± 0.07 (2549)                                          | 0.36 ± 0.09 (2907)                                          | 0.36 ± 0.09 (2155)                                          | 0.33 ± 0.10 (2431)                                          |
| 6               | 0.05 ± 0.04 (2384)                                          | 0.05 ± 0.03 (2413)                                          | 0.20 ± 0.08 (2227)                                          | 0.20 ± 0.07 (2259)                                          | 0.10 ± 0.06 (2505)                                          |
| 8               | 0.19 ± 0.12 (3086)                                          | 0.09 ± 0.04 (1768)                                          | 0.32 ± 0.09 (1988)                                          | 0.20 ± 0.09 (2695)                                          | 0.20 ± 0.06 (1828)                                          |

## SUPPORTING INFORMATION

## References

- [1] H. Tanaka, R. Takeuchi, M. Jimbo, N. Kuniya, T. Takahashi, *Chem. Eur. J.* **2013**, *19*, 3177.
- [2] H. Isobe, K. Cho, N. Solin, D. B. Werz, P. H. Seeberger, E. Nakamura, *Org. Lett.* **2007**, *9*, 4611.
- [3] C. Bucher, R. Gilmour, *Angew. Chem., Int. Ed.* **2010**, *49*, 8724.
- [4] O. M. Schütte, A. Ries, A. Orth, L. J. Patalag, W. Römer, C. Steinem, D. B. Werz, *Chem. Sci.* **2014**, *5*, 3104.
- [5] M. Pawliczek, J. Wallbaum, D. Werz, *Synlett* **2014**, *25*, 1435.
- [6] a) M. S. Sandbhor, J. A. Key, I. S. Strelkov, C. W. Cairo, *J. Org. Chem.* **2009**, *74*, 8669; b) E. D. Goddard-Borger, R. V. Stick, *Org. Lett.* **2011**, *13*, 2514; c) E. D. Goddard-Borger, R. V. Stick, *Org. Lett.* **2007**, *9*, 3797; d) K. Sa-Ei, J. Montgomery, *Tetrahedron* **2009**, *65*, 6707; e) T. Murakami, K. Furusawa, *Tetrahedron* **2002**, *58*, 9257.
- [7] a) W. R. Roush, J. A. Hunt, *J. Org. Chem.* **1995**, *60*, 798; b) P. Garner, J. M. Park, *Org. Synth.* **1992**, *70*, 18; c) A. Dondoni, D. Perrone, *Org. Synth.* **2000**, *77*, 64; d) P. Garner, *Tetrahedron Lett.* **1984**, *25*, 5855.
- [8] L. J. Patalag, J. Sibold, O. M. Schütte, C. Steinem, D. B. Werz, *ChemBioChem* **2017**, *18*, 2171.
- [9] K. Sandvig, M. Ryd, O. Garred, E. Schweda, P. K. Holm, B. vanDeurs, *J. Cell Biol.* **1994**, *126*, 53.
- [10] R. I. MacDonald, *J. Biol. Chem.* **1990**, *265*, 13533.
